# Supplementary material for: Catalytic and mechanistic studies of a highly active and E-selective Co(ii) PNNH pincer catalyst system for transfer-semihydrogenation of internal alkynes
Source: Royal Society of Chemistry journal article supplement (doi:10.1039/d1qi00998b), 2022-01-01
Supplement: d1qi00998b1.pdf [file d1qi00998b1.pdf]

## Catalytic and mechanistic studies of a highly active and *E*-selective Co(II) PNN<sup>H</sup> pincer catalyst system for transfer-semihydrogenation of internal alkynes

David Decker<sup>a</sup>, Zhihong Wei<sup>b</sup>, Jabor Rabeah<sup>a</sup>, Hans-Joachim Drexler<sup>a</sup>, Angelika Brückner<sup>a</sup>, Haijun Jiao<sup>a</sup>, and Torsten Beweries<sup>a</sup>

<sup>a</sup> Leibniz-Institut für Katalyse e.V. (LIKAT), Albert-Einstein-Str. 29a, 18059 Rostock, Germany.

<sup>b</sup> Institute of Molecular Science, Key Laboratory of Materials for Energy Conversion and Storage of Shanxi Province, Shanxi University, Taiyuan 030006, P. R. China.

E-mail: [haijun.jiao@catalysis.de](mailto:haijun.jiao@catalysis.de); [torsten.beweries@catalysis.de](mailto:torsten.beweries@catalysis.de).

### Table of contents

|     |                            |
|-----|----------------------------|
| S2  | General Information        |
| S15 | NMR spectra                |
| S27 | Mechanistic investigations |
| S43 | DFT Calculations           |
| S85 | References                 |

## Experimental Section

### General considerations

All experiments, unless otherwise stated, were performed under oxygen- and moisture-free conditions under an inert atmosphere of argon using standard Schlenk and glovebox techniques.

Methanol (99.8%, Extra Dry over Molecular Sieve, AcroSeal™), 2-Propanol (99.5%, Extra Dry over Molecular Sieve, AcroSeal™) were purchased from Acros Organics, transferred to a Schlenk flask and stored over molecular sieve (3 Å). Ammonia borane was purchased from Sigma-Aldrich and stored in the glovebox. 2-Methyl-6-[5(3)-(tert-butyl)-1H-pyrazol-3(5)-yl]pyridine and P<sup>Bu</sup>NNCoCl<sub>2</sub> complex **1a** were synthesised according to the literature.<sup>1</sup> Deuterated educts were synthesized according to literature.<sup>2</sup>

<sup>1</sup>H, <sup>11</sup>B, <sup>11</sup>B{<sup>1</sup>H}<sup>13</sup>C{<sup>1</sup>H} and <sup>31</sup>P{<sup>1</sup>H} NMR spectra were recorded at room temperature on Bruker AV300, AV400 or Fourier300 spectrometers. All <sup>1</sup>H and <sup>13</sup>C NMR spectra were referenced using the chemical shifts of residual proton solvent resonances (CD<sub>2</sub>Cl<sub>2</sub>: δ<sub>H</sub> 5.32 ppm, δ<sub>C</sub> 53.84 ppm, CDCl<sub>3</sub>: δ<sub>H</sub> 7.26 ppm, δ<sub>C</sub> 77.16 ppm, C<sub>6</sub>D<sub>6</sub>: 7.16 ppm).

### Synthesis of ligands and precatalysts

#### Synthesis of 2-(5-(tert-butyl)-1H-pyrazol-3-yl)-6-((diisopropylphosphaneyl)methyl)pyridine (**2**)

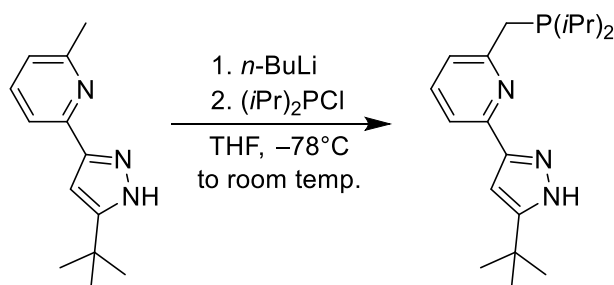

At -78°C a solution of *n*-BuLi (2.5 eq., 2.1 mL, 2.5 M in hexane) were added dropwise over a period of 10 min to a solution of 2-methyl-6-pyrazolylpyridine (451 mg, 2.09 mmol) in THF (10 mL). A colour change to red was observed immediately. The reaction mixture was stirred overnight and slowly warmed to room temperature. A red precipitation formed overnight. Then the solution was cooled again to -78°C and ClP*i*Pr<sub>2</sub> (1.2 eq., 368 μL, 353 mg, 2.55 mmol) was slowly added. The mixture was stirred overnight and allowed to warm to room temperature. The reaction mixture was diluted with EtO<sub>2</sub> (15 mL). Then degassed water (5 mL) was added and the solution was stirred for 10 min. The organic layer was separated, and the solvent was removed in vacuum. The product was obtained as yellow oil (512 mg, 1.57 mmol, 75%). The purity of the crude product was high enough for metalation. Further purification steps failed due the high solubility. Two pyrazole H tautomers were observed. – <sup>1</sup>H NMR (400 MHz, CDCl<sub>3</sub>): δ(isomer 1) 10.60 (br s, 1 H, NH), 7.27 (d, *J* = 7.1 Hz, 1H), 7.54–7.49 (m, 2H), 6.46 (s, 1H), 2.92 (br s, 2H, CH<sub>2</sub>), 1.80–1.73 (m, 2H), 1.30 (s, 9H), 1.10–1.00 (m, 12H). δ(isomer 2) 9.82 (br s, 1 H, NH), 7.71 (d, *J* = 7.1 Hz, 1H), 7.12–7.09 (m, 2H), 6.57 (s, 1H), 2.97 (d, *J* = 2.1 Hz, 2H, CH<sub>2</sub>), 2.54–2.46 (m, 2H), 1.43 (s, 9H), 1.12–1.07 (m, 12H). <sup>31</sup>P NMR (400 MHz, CDCl<sub>3</sub>): δ(isomer 1) 13.38; δ(isomer 2) 12.08. MS (ESI): *m/z* 332.37 (100) [M+H]<sup>+</sup>. HRMS (ESI): Calcd. C<sub>19</sub>H<sub>30</sub>N<sub>3</sub>P [M+H]<sup>+</sup>: *m/z* 332.2256. Found: 332.2256.

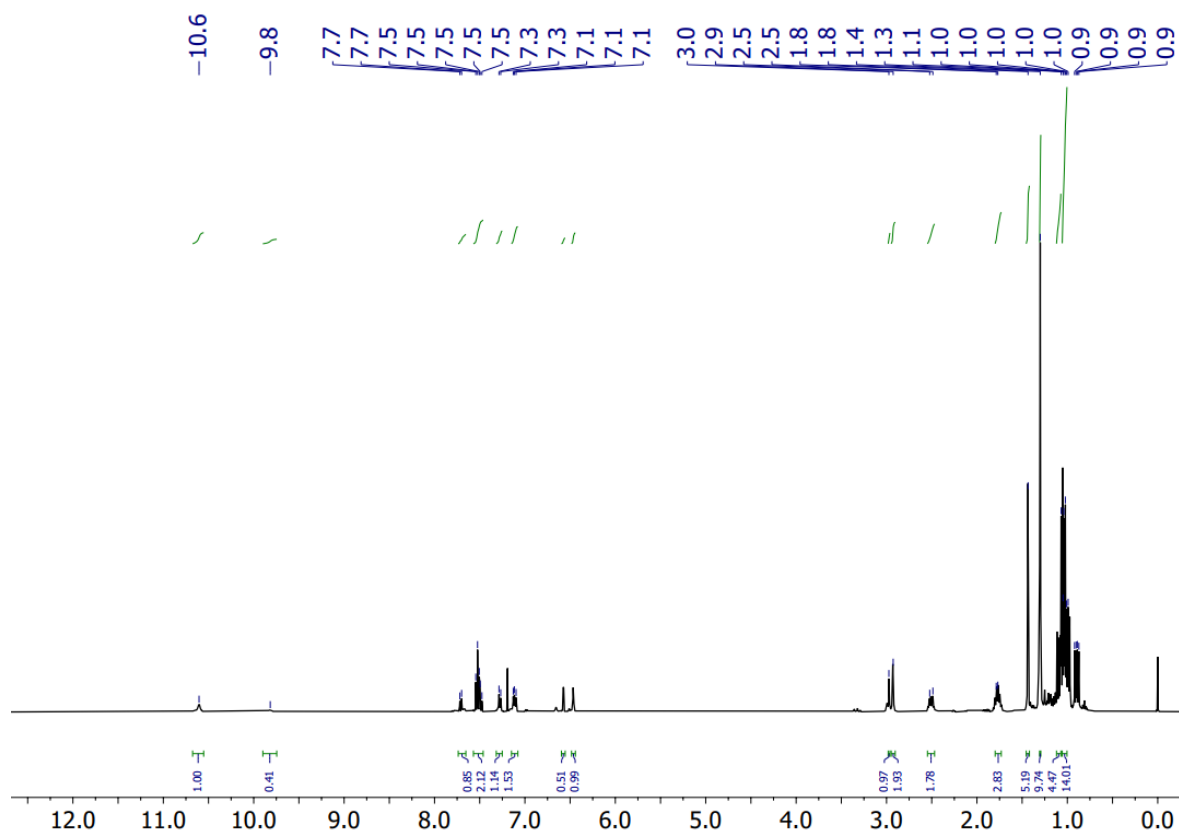

Figure S 1.  $^1\text{H}$  NMR spectrum of **2** ( $\text{CDCl}_3$ , 25 °C).

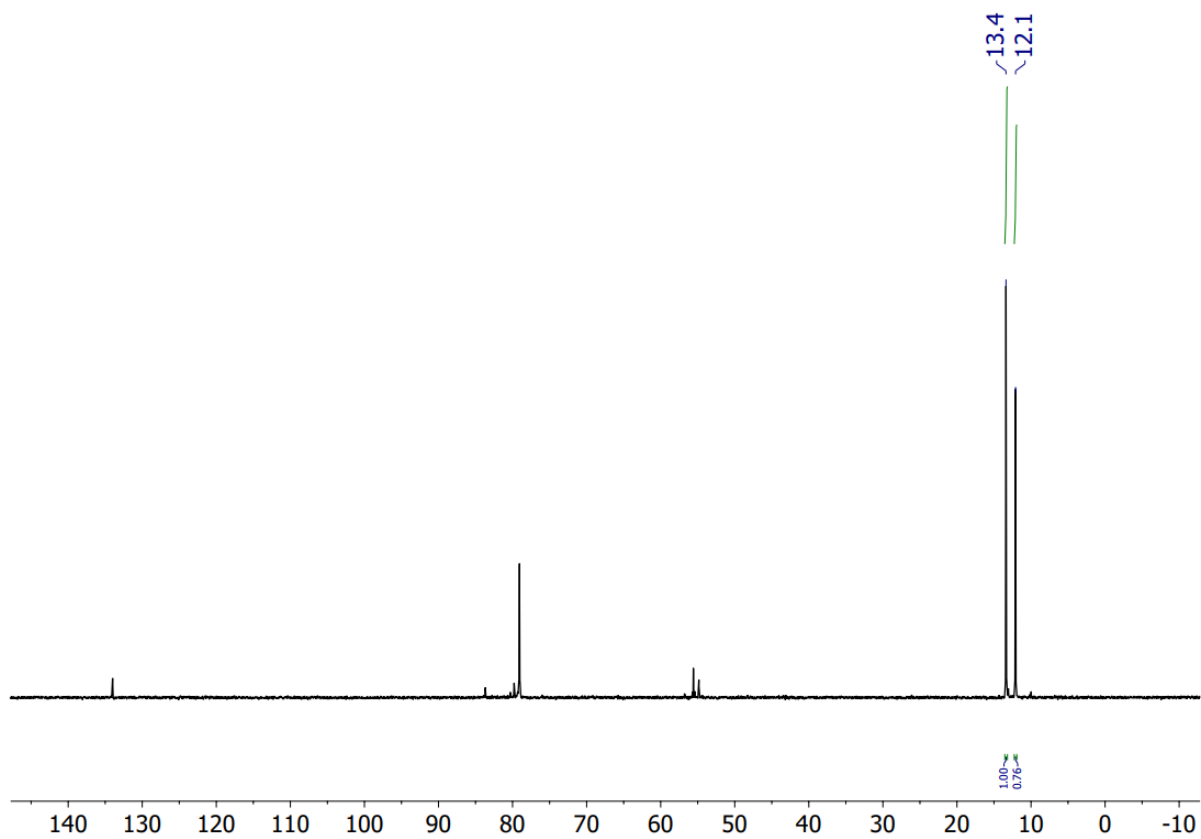

Figure S 2.  $^{31}\text{P}$ -NMR spectrum of **2** ( $\text{CDCl}_3$ , 25 °C).

$P^{iPr}NCoCl_2$  (**1b**)

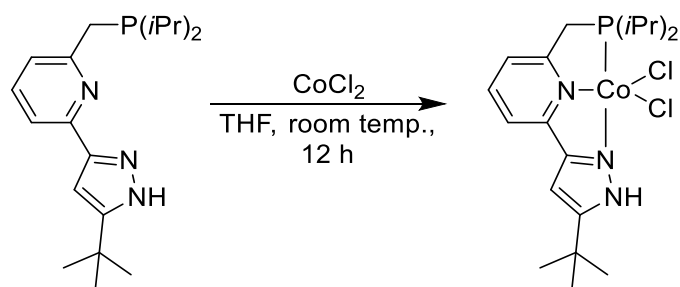

To a suspension of  $CoCl_2$  (43.1 mg, 332  $\mu$ mol) in THF (15 mL) was added a solution of ligand **2** (110 mg, 332  $\mu$ mol) in THF (5 mL). The reaction mixture was stirred for 12 h at room temperature. The solvent was removed in vacuum and the corresponding residue was extracted with benzene (3x10 mL) and filtered. The solvent was removed in vacuum to  $\approx$  1 mL and then pentane (20 mL) was added. The precipitation was filtered and washed with  $Et_2O$  (2x 10 mL) and pentane (2x 10 mL). The product was obtained as a green solid (97.3 mg, 258  $\mu$ mol, 78%). –  $^1H$  NMR (300 MHz,  $CDCl_3$ ):  $\delta$  79.81 (br s, 2 H), 61.27 (br s, 1 H), 54.14 (br s, 1 H), 42.20 (br s, 1 H), 18.33 (br s, 2 H), 4.86 (br s), –11.14 (br s). MS (ESI):  $m/z$  332 [ $M-CoCl_2$ ] $^+$ ,  $m/z$  216 [ $C_{13}H_{17}N_3+H$ ] $^+$ .

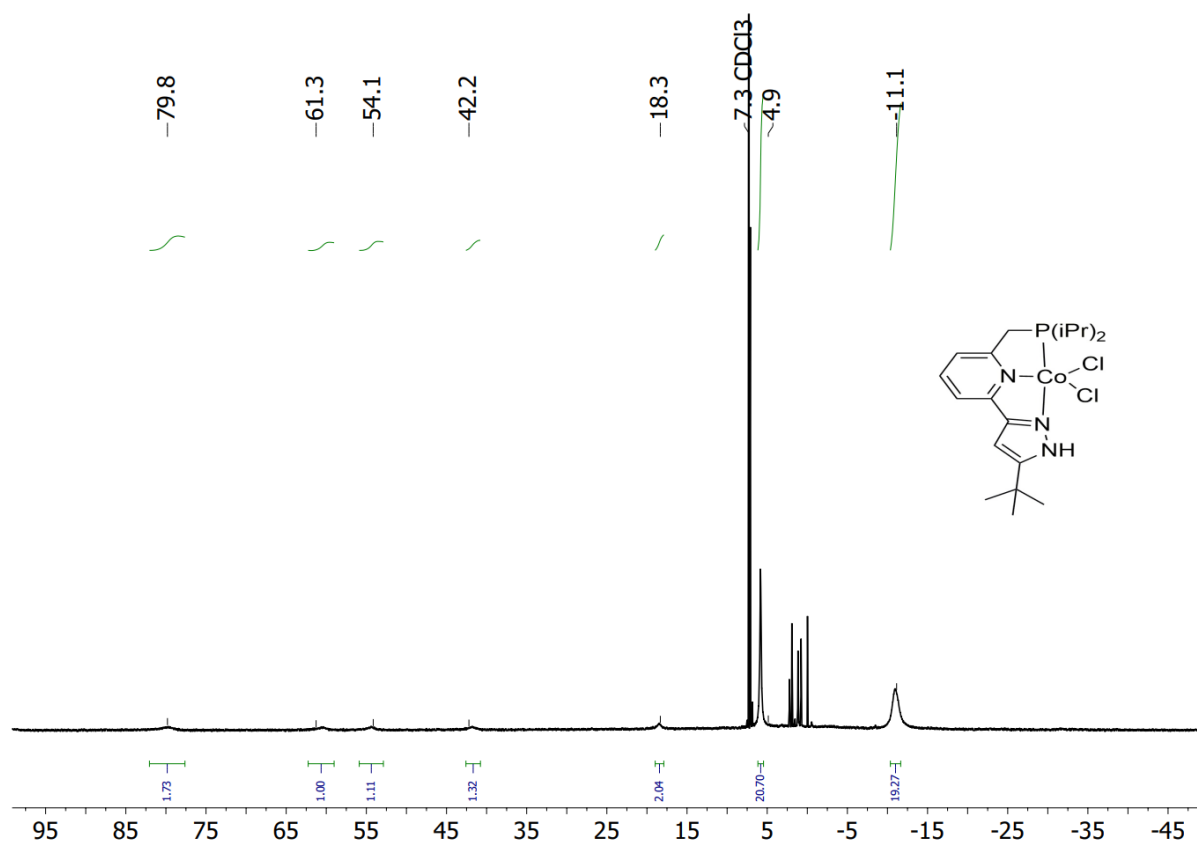

Figure S 3.  $^1H$  NMR spectrum of **1b** ( $CDCl_3$ , 25  $^\circ C$ ).

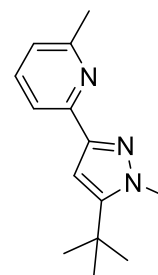

**Synthesis of 2-(5-(tert-butyl)-1-methyl-1H-pyrazol-3-yl)-6-methylpyridine<sup>3</sup> (3)**

To a suspension of NaH (35.8 mg, 1.45 mmol, 1.25 eq.) in THF (10 mL) was added dropwise a solution of 2-methyl-6-pyrazolylpyridine (250 mg, 1.16 mmol) in THF (8 ml). Then, solid [Me<sub>3</sub>O][BF<sub>4</sub>] (189 mg, 1.28 mmol, 1.1 eq.) was added in small portions at 0°C. After addition, the reaction mixture was stirred overnight and slowly warmed to room temperature. The reaction mixture was filtered, and the solvent was removed in vacuum. The residue was redissolved in CH<sub>2</sub>Cl<sub>2</sub> (15 mL) and washed with H<sub>2</sub>O (4x10 mL). The combined organic layers were dried over Na<sub>2</sub>SO<sub>4</sub>, filtered and the solvent was removed in vacuum. The compound was recrystallized from EtOAc, resulting in colorless needles of the product (221 mg, 964 μmol, 83%). – <sup>1</sup>H NMR (300 MHz, CDCl<sub>3</sub>): δ = 7.70–7.62 (m, 1 H), 7.55 (t, *J* = 7.7 Hz, 1 H), 7.04–6.97 (m, 1 H), 6.62 (s, 1 H), 3.99 (s, 3 H), 2.52 (s, 3 H), 1.41 (s, 9 H). – <sup>13</sup>C NMR (75 MHz, CD<sub>2</sub>Cl<sub>2</sub>) δ = 157.88, 152.57, 152.01, 149.31, 136.47, 121.33, 116.30, 102.15, 53.84, 39.68, 31.20, 29.42, 24.32. El. Anal. for C<sub>14</sub>H<sub>19</sub>N<sub>3</sub> (229.33), calcd (%): C 73.32, H 8.35, N 18.32, found (%): C 73.36, H 8.83, N 18.00.– MS (ESI): *m/z* 230.28 (100) [M+H]<sup>+</sup>.

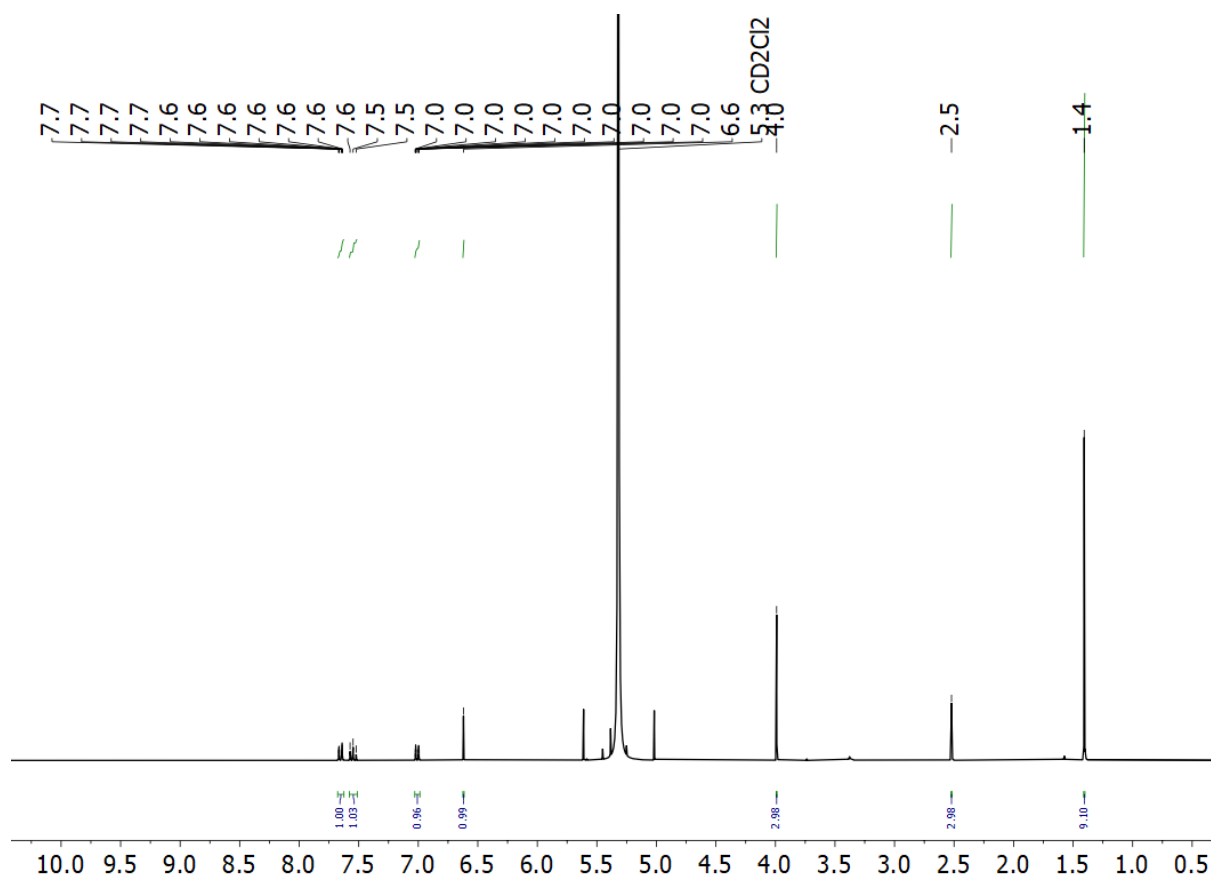

**Figure S 4.** <sup>1</sup>H NMR spectrum of **3** (CD<sub>2</sub>Cl<sub>2</sub>, 25 °C).

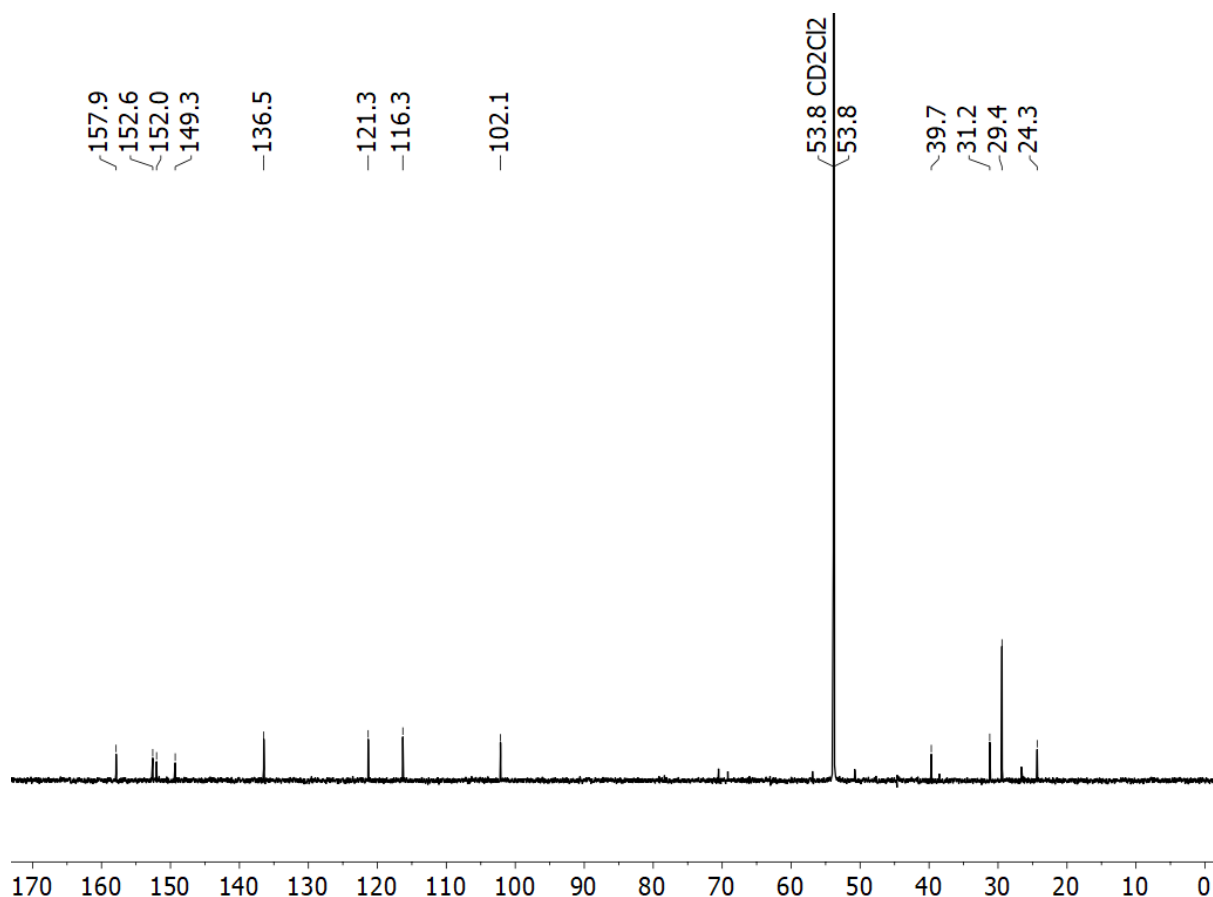

**Figure S 5.** <sup>13</sup>C NMR spectrum of **3** (CD<sub>2</sub>Cl<sub>2</sub>, 25 °C).

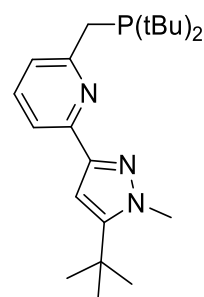

**Synthesis of 2-(5-(tert-butyl)-1-methyl-1H-pyrazol-3-yl)-6-((di-tert-butylphosphaneyl)methyl)pyridine (**4**)**

At  $-78^{\circ}\text{C}$  a solution of *n*-BuLi (1.10 eq., 191  $\mu\text{L}$ , 2.5 M in hexane) was added dropwise to a solution 2-(5-(tert-butyl)-1-methyl-1H-pyrazol-3-yl)-6-methylpyridine (99.7 mg, 435  $\mu\text{mol}$ ) in THF (10 mL) over a period of 10 min. A colour change to purple was observed immediately. The reaction mixture was stirred overnight and slowly warmed to room temperature. Then the solution was cooled again to  $-78^{\circ}\text{C}$  and  $\text{ClP}t\text{Bu}_2$  (1.10 eq., 90.1  $\mu\text{L}$ , 86.4 mg, 478  $\mu\text{mol}$ ) was slowly added. The mixture was stirred overnight and allowed to warm to room temperature. The reaction mixture was diluted with  $\text{Et}_2\text{O}$  (15 mL). Then degassed water (5 mL) was added and the solution was stirred for 10 min. The organic layer was separated, and the solvent was removed in vacuum. The product was obtained as yellow oil (132.4 mg, 354  $\mu\text{mol}$ , 82%). The purity of the crude product was high enough for subsequent metalation. Further purification steps failed due the high solubility. – <sup>1</sup>H NMR (400 MHz, CDCl<sub>3</sub>):  $\delta$  = 7.67–7.58 (m, 1 H), 7.56 (t,  $J$  = 7.6 Hz, 1 H), 7.32–7.23 (m, 1 H), 6.62 (s, 1 H), 4.00 (s, 3 H), 3.06 (d,  $J$  = 3.1 Hz, 2 H), 1.42 (s, 9 H), 1.18 (s, 9 H), 1.14 (s, 9 H). <sup>31</sup>P NMR (400 MHz, CD<sub>2</sub>Cl<sub>2</sub>):  $\delta$  = 35.9 (s). MS (ESI):  $m/z$  374.49 (100) [M+H]<sup>+</sup>. HRMS (ESI): Calcd. C<sub>22</sub>H<sub>36</sub>N<sub>3</sub>P [M+H]<sup>+</sup>:  $m/z$  374.2725. Found: 374.2732.



$P^{tBu}NN^{Me}CoCl_2$  (**1a-Me**)

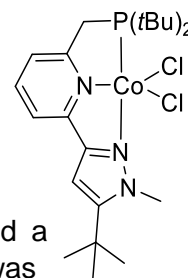

To a suspension of  $CoCl_2$  (29.6 mg, 228  $\mu$ mol) in THF (10 mL) was added a solution of ligand **4** (85 mg, 228  $\mu$ mol) in THF (5 mL). The reaction mixture was stirred for 12 h at room temperature. A colour change to turquoise-blue was observed. The solvent was removed in vacuum and the corresponding residue was extracted with benzene (3x10 mL) and filtered. The solvent was removed in vacuum and the residue was washed with pentane (3x10 mL). After removing of the solvent, the product was obtained as dark blue solid (94.5 mg, 188  $\mu$ mol, 83%). –  $^1H$  NMR (400 MHz,  $C_6D_6$ ):  $\delta$  = 66.34 (s, 1 H), 61.40 (s, 2 H), 57.61 (s, 1 H), 24.58 (s, 1 H), 5.38 (s, 2 H), -11.65 (s, 18 H), -12.82 (br s), -42.06 (s, 3 H). MS (ESI):  $m/z$  374  $[M-CoCl_2]^+$ ,  $m/z$  216  $[C_{14}H_{19}N_3+H]^+$ .

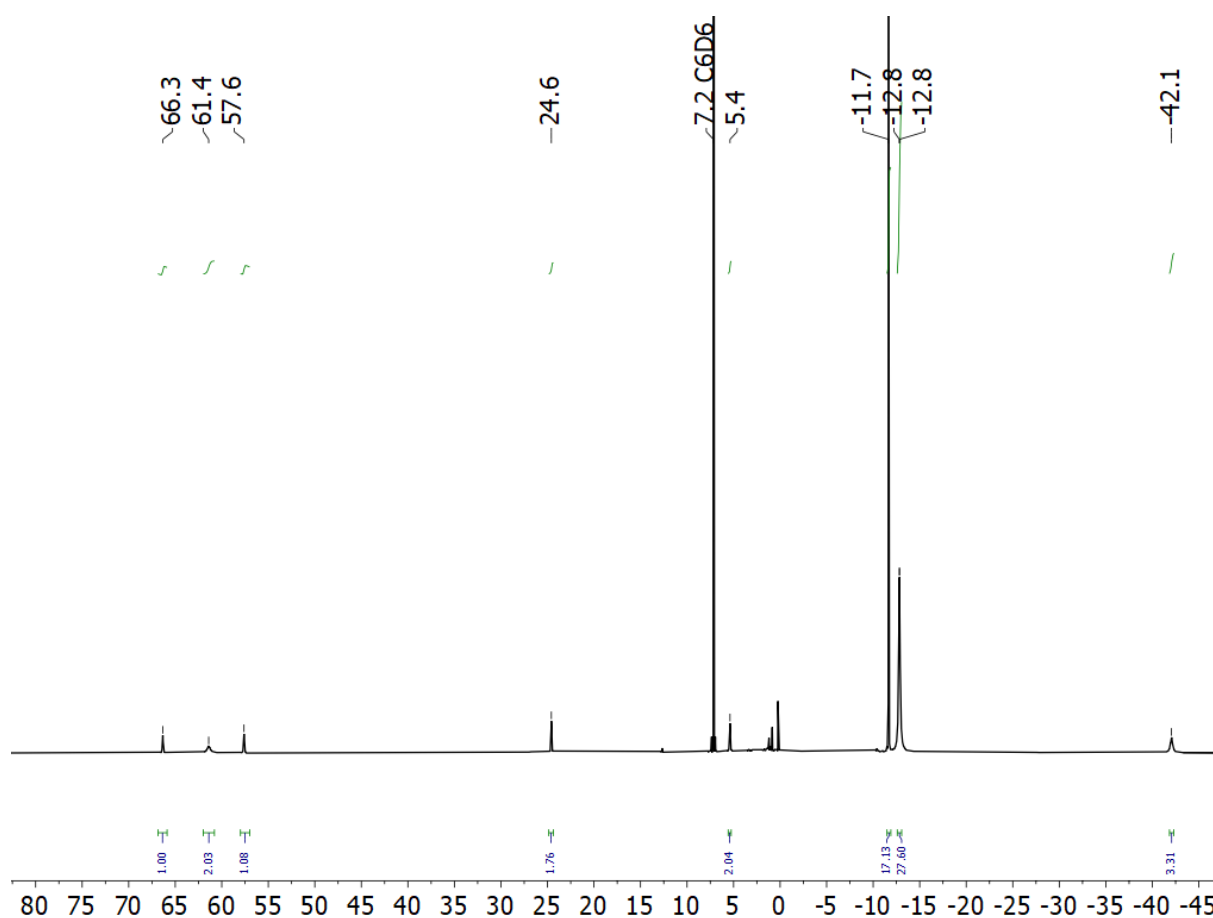

**Figure S 8.**  $^1H$  NMR spectrum of **1a-Me** ( $C_6D_6$ , 25  $^\circ$ C).



## Synthesis of alkynes<sup>4</sup>

### General procedure (GP1)

The corresponding aryl iodide (1 eq.), phenylacetylene (1 eq.), Pd(PPh<sub>3</sub>)<sub>2</sub>Cl<sub>2</sub> (1 mol%), PPh<sub>3</sub> (1 mol%) and Cul (1 mol%) were stirred together over night in THF and NEt<sub>3</sub> under an atmosphere of Ar. Afterwards H<sub>2</sub>O (15 mL) were added and the reaction mixture was extracted with EtOAc (3 x 15 mL). The combined organic phases were washed with brine (3 x 10 mL) and dried over Na<sub>2</sub>SO<sub>4</sub>, filtered and the solvent was removed under reduced pressure. The residue was then purified by column chromatography.

### 1-nitro-4-(phenylethynyl)benzene

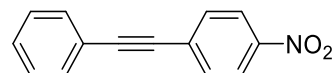

According to GP 1, 1-iodo-4-nitrobenzene (1.22 g, 4.90 mmol), Pd(PPh<sub>3</sub>)<sub>2</sub>Cl<sub>2</sub> (34.4 mg, 1 mol%), PPh<sub>3</sub> (12.8 mg, 1 mol%) and Cul (9.32 mg, 1 mol%) made to react with phenylacetylene (500 mg, 4.90 mmol, 538  $\mu$ L) in THF (10 mL) and NEt<sub>3</sub> (10 mL). After work up and purification by column chromatography (SiO<sub>2</sub>; eluent: hexane/EtOAc 10/1,  $R_f$  = 0.26) the product was obtained as yellow solid (625 mg, 2.80 mmol, 57%). mp.: 118–120 °C (lit.: 120–122 °C<sup>5</sup>). – <sup>1</sup>H NMR (300 MHz, CDCl<sub>3</sub>):  $\delta$  8.22 (d,  $J$  = 9.0 Hz, 2 H, Ar-H), 7.67 (d,  $J$  = 9.0 Hz, 2 H, Ar-H), 7.60–7.52 (m, 2 H, Ar-H), 7.44–7.34 (m, 3 H, Ar-H).

### 1-methoxy-4-(phenylethynyl)benzene

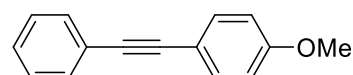

According to GP 1, 1-iodo-4-methoxybenzene (1.15 g, 4.90 mmol), Pd(PPh<sub>3</sub>)<sub>2</sub>Cl<sub>2</sub> (34.4 mg, 1 mol%), PPh<sub>3</sub> (12.8 mg, 1 mol%) and Cul (9.32 mg, 1 mol%) made to react with phenylacetylene (500 mg, 4.90 mmol, 538  $\mu$ L) in THF (10 mL) and NEt<sub>3</sub> (10 mL). After work up and purification by column chromatography (SiO<sub>2</sub>; eluent: hexane/EtOAc 10/1,  $R_f$  = 0.38) the product was obtained as white solid (754 mg, 3.62 mmol, 74%). – mp.: 56–58 °C (lit.: 57–59 °C<sup>6</sup>). – <sup>1</sup>H NMR (300 MHz, CD<sub>2</sub>Cl<sub>2</sub>):  $\delta$  7.55–7.45 (m, 4 H, Ar-H), 7.40–7.32 (m, 3 H, Ar-H), 6.90 (d,  $J$  = 9.0 Hz, 2 H, Ar-H), 3.82 (s, 3 H, OCH<sub>3</sub>).

### 4-(phenylethynyl)aniline

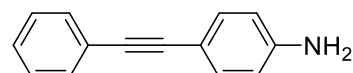

According to GP 1, 4-iodoaniline (1.15 g, 4.90 mmol), Pd(PPh<sub>3</sub>)<sub>2</sub>Cl<sub>2</sub> (34.4 mg, 1 mol%), PPh<sub>3</sub> (12.8 mg, 1 mol%) and Cul (9.32 mg, 1 mol%) made to react with phenylacetylene (500 mg, 4.90 mmol, 538  $\mu$ L) in THF (10 mL) and NEt<sub>3</sub> (10 mL). After work up and purification by column chromatography (SiO<sub>2</sub>; eluent: pentane/EtOAc 4/1,  $R_f$  = 0.42) the product was obtained as brown solid (736 mg, 3.81 mmol, 78%). – mp.: 125–127 °C (dec.). (lit.: 126–128 °C<sup>7</sup>). – <sup>1</sup>H NMR (300 MHz, CDCl<sub>3</sub>):  $\delta$  7.56–7.47 (m, 2 H, Ar-H), 7.38–7.28 (m, 5 H, Ar-H), 6.64 (d,  $J$  = 8.7 Hz, 2 H, Ar-H), 3.81 (s, 2 H, NH<sub>2</sub>).

### 1-methyl-2-(phenylethynyl)benzene

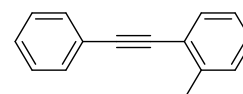

According to GP 1, 1-iodo-2-methylbenzene (1.07 g, 4.90 mmol, 626  $\mu$ L), Pd(PPh<sub>3</sub>)<sub>2</sub>Cl<sub>2</sub> (34.4 mg, 1 mol%), PPh<sub>3</sub> (12.8 mg, 1 mol%) and Cul (9.32 mg, 1 mol%) made to react with phenylacetylene (500 mg, 4.90 mmol, 538  $\mu$ L) in THF (10 mL) and NEt<sub>3</sub> (10 mL). After work

up by vacuum distillation (bp.: 84 °C, 1.0 μbar) the product was obtained as colorless liquid (714 mg, 3.72 mmol, 76%). – <sup>1</sup>H NMR (300 MHz, CDCl<sub>3</sub>): δ 7.56–7.43 (m, 3 H, Ar-H), 7.37–7.25 (m, 3 H, Ar-H), 7.23–7.09 (m, 3 H, Ar-H), 2.54 (s, 3 H, CH<sub>3</sub>).

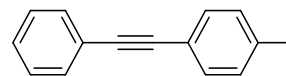

### 1-methyl-4-(phenylethynyl)benzene

According to GP 1, 1-iodo-4-methylbenzene (1.07 g, 4.90 mmol), Pd(PPh<sub>3</sub>)<sub>2</sub>Cl<sub>2</sub> (34.4 mg, 1 mol%), PPh<sub>3</sub> (12.8 mg, 1 mol%) and CuI (9.32 mg, 1 mol%) made to react with phenylacetylene (500 mg, 4.90 mmol, 538 μL) in THF (10 mL) and NEt<sub>3</sub> (10 mL). After work up and purification by column chromatography (SiO<sub>2</sub>; eluent: pentane/CH<sub>2</sub>Cl<sub>2</sub> 6/4, R<sub>f</sub> = 0.30) the product was obtained as pale yellow solid (825 mg, 4.29 mmol, 87%). – mp.: 68–71 °C (dec.). (lit.: 70–72 °C<sup>8</sup>). – <sup>1</sup>H NMR (300 MHz, CDCl<sub>3</sub>): δ 7.61–7.50 (m, 2 H, Ar-H), 7.44 (d, J = 8.1 Hz, 2 H, Ar-H), 7.39–7.30 (m, 3 H, Ar-H), 7.17 (d, J = 7.9 Hz, 2 H, Ar-H), 2.38 (s, 3 H, CH<sub>3</sub>).

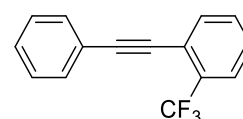

### 1-(phenylethynyl)-2-(trifluoromethyl)benzene

According to GP 1, 1-iodo-2-(trifluoromethyl)benzene (686 μL, 1.33 g, 4.90 mmol), Pd(PPh<sub>3</sub>)<sub>2</sub>Cl<sub>2</sub> (34.4 mg, 1 mol%), PPh<sub>3</sub> (12.8 mg, 1 mol%) and CuI (9.32 mg, 1 mol%) made to react with phenylacetylene (500 mg, 4.90 mmol, 538 μL) in THF (10 mL) and NEt<sub>3</sub> (10 mL). After work up and purification by column chromatography (SiO<sub>2</sub>; eluent: pentane, R<sub>f</sub> = 0.91) the product was obtained as colorless liquid (1.06 g, 4.30 mmol, 88%). – <sup>1</sup>H NMR (300 MHz, CDCl<sub>3</sub>): δ 7.74–7.66 (m, 2 H, Ar-H), 7.61–7.56 (m, 2 H, Ar-H), 7.56–7.49 (m, 1 H, Ar-H), 7.46–7.41 (m, 1 H, Ar-H), 7.41–7.35 (m, 3 H, Ar-H).

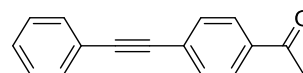

### 1-(4-(phenylethynyl)phenyl)ethan-1-one

According to GP 1, 1-(4-iodophenyl)ethan-1-one (1.21 g, 4.90 mmol), Pd(PPh<sub>3</sub>)<sub>2</sub>Cl<sub>2</sub> (34.4 mg, 1 mol%), PPh<sub>3</sub> (12.8 mg, 1 mol%) and CuI (9.32 mg, 1 mol%) made to react with phenylacetylene (500 mg, 4.90 mmol, 538 μL) in THF (10 mL) and NEt<sub>3</sub> (10 mL). After work up and purification by column chromatography (SiO<sub>2</sub>; eluent: hexane/CH<sub>2</sub>Cl<sub>2</sub> 6/4, R<sub>f</sub> = 0.56) the product was obtained as off white solid (965 mg, 4.39 mmol, 89%). – mp.: 94–96 °C. (lit.: 95–97 °C<sup>9</sup>). – <sup>1</sup>H NMR (300 MHz, CD<sub>2</sub>Cl<sub>2</sub>): δ 7.94 (d, J = 8.7 Hz, 2 H, Ar-H), 7.63 (d, J = 8.7 Hz, 2 H, Ar-H), 7.60–7.53 (m, 2 H, Ar-H), 7.44–7.33 (m, 3 H, Ar-H), 2.59 (s, 3 H, CH<sub>3</sub>).

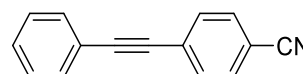

### 4-(phenylethynyl)benzonitrile

According to GP 1, 4-iodobenzonitrile (1.12 g, 4.90 mmol), Pd(PPh<sub>3</sub>)<sub>2</sub>Cl<sub>2</sub> (34.4 mg, 1 mol%), PPh<sub>3</sub> (12.8 mg, 1 mol%) and CuI (9.32 mg, 1 mol%) made to react with phenylacetylene (500 mg, 4.90 mmol, 538 μL) in THF (10 mL) and NEt<sub>3</sub> (10 mL). After work up and purification by column chromatography (SiO<sub>2</sub>; eluent: hexane/CH<sub>2</sub>Cl<sub>2</sub> 6/4, R<sub>f</sub> = 0.56) the product was obtained as white solid (901 mg, 4.44 mmol, 91%). – mp.: 104–106 °C. (lit.: 103–105 °C<sup>10</sup>). – <sup>1</sup>H NMR (300 MHz, CD<sub>2</sub>Cl<sub>2</sub>): δ 7.71–7.60 (m, 4 H, Ar-H), 7.59–7.52 (m, 2 H, Ar-H), 7.45–7.36 (m, 3 H, Ar-H).

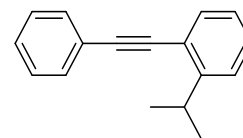

### 1-isopropyl-2-(phenylethynyl)benzene

According to GP 1, 1-iodo-2-isopropylbenzene (763  $\mu\text{L}$ , 1.21 g, 4.90 mmol),  $\text{Pd}(\text{PPh}_3)_2\text{Cl}_2$  (34.4 mg, 1 mol%),  $\text{PPh}_3$  (12.8 mg, 1 mol%) and  $\text{CuI}$  (9.32 mg, 1 mol%) made to react with phenylacetylene (500 mg, 4.90 mmol, 538  $\mu\text{L}$ ) in THF (10 mL) and  $\text{NEt}_3$  (10 mL). After work up and purification by vacuum distillation the product was obtained as colorless liquid (757 mg, 3.44 mmol, 70%). –  $^1\text{H}$  NMR (300 MHz,  $\text{CD}_2\text{Cl}_2$ ):  $\delta$  7.74–7.49 (m, 3 H, Ar-H), 7.45–7.30 (m, 5 H, Ar-H), 7.28–7.08 (m, 1 H, Ar-H), 3.58 (hept,  $J = 6.9$  Hz 1 H, C-H), 1.33 (d,  $J = 6.9$  Hz, 6 H,  $\text{CH}_3$ ).

### General protocol for the transfer semihydrogenation of alkynes

#### General procedure (GP 2)

Under an atmosphere of argon, cobalt complex **1a** or **1b** (1–0.01 mol%), ammonia borane (15.4 mg, 0.50 mmol), diphenylacetylene (89.1 mg, 0.50 mmol) and alcohol (2 mL) were added sequentially to a preheated Schlenk tube equipped with a magnetic stir bar. The reaction mixture was stirred for 1–118 h at room temperature or 50 °C. Subsequently the reaction mixture was exposed to air and  $\text{CH}_2\text{Cl}_2$  (5 mL) was added. An aliquot of this solution was analysed by gas chromatography with biphenyl as the internal standard.

**Table S 1.** Influence of the catalyst loading, solvents, and boron source on the transfer hydrogenation.

$$\text{Ph}-\text{C}\equiv\text{C}-\text{Ph} + [\text{BH}] \xrightarrow[\text{solvent}]{\text{P}^t\text{BuNnCoCl}_2} \text{Ph}-\text{CH}=\text{CH}-\text{Ph} + \text{Ph}-\text{CH}=\text{CH}-\text{Ph}$$

| entry          | [BH]                                          | c(catalyst) / mol% | solvent                    | time / h | Conversion / % | E-yield / % | Z-yield / % |
|----------------|-----------------------------------------------|--------------------|----------------------------|----------|----------------|-------------|-------------|
| 1              | $\text{H}_3\text{B}\cdot\text{NH}_3$          | 1                  | MeOH                       | 0.5      | $\geq 95$      | 100         | –           |
| 2 <sup>a</sup> | $\text{H}_3\text{B}\cdot\text{NH}_3$          | 0.5                | MeOH                       | 0.5      | $\geq 95$      | 100         | –           |
| 3              | $\text{H}_3\text{B}\cdot\text{NH}_3$          | 0.1                | MeOH                       | 0.5      | $\geq 95$      | 99          | 1           |
| 4              | $\text{H}_3\text{B}\cdot\text{NH}_3$          | 0.01               | MeOH                       | 12       | 65             | 32          | 68          |
| 5 <sup>a</sup> | $\text{H}_3\text{B}\cdot\text{NH}_3$          | 1                  | EtOH                       | 0.5      | $\geq 95$      | 99          | 1           |
| 6              | $\text{H}_3\text{B}\cdot\text{NH}_3$          | 1                  | <i>i</i> -PrOH             | 1        | $\geq 95$      | 38          | 62          |
| 7              | $\text{H}_3\text{B}\cdot\text{NH}_3$          | 1                  | <i>i</i> -PrOH             | 2        | $\geq 95$      | 99          | 1           |
| 8              | $\text{H}_3\text{B}\cdot\text{NMe}_2$         | 1                  | MeOH                       | 0.5      | $\geq 95$      | 100         | –           |
| 9              | $\text{H}_3\text{B}\cdot\text{NMe}_2\text{H}$ | 1                  | MeOH                       | 1.25     | $\geq 95$      | 100         | –           |
| 10             | $\text{H}_3\text{B}\cdot\text{THF}$           | 1                  | MeOH                       | 19       | $\leq 5$       | 38          | 62          |
| 11             | $\text{H}_3\text{B}\cdot\text{NH}_3$          | 1                  | MeOH/ $\text{H}_2\text{O}$ | 2        | $\leq 5$       | 90          | 10          |
| 12             | $\text{H}_3\text{B}\cdot\text{NH}_3$          | 1                  | $\text{H}_2\text{O}$       | 2        | 12             | 46          | 54          |

Reaction conditions: Diphenylacetylene (0.50 mmol), [BH] (0.50 mmol),  $V(\text{solvent}) = 2.0$  mL,  $T =$  room temperature, Yields were determined by GC-Analysis using biphenyl as the internal standard. <sup>a</sup> $T = 50$  °C.

## Characterisation data for alkene products

### General procedure (GP3)

Under an atmosphere of argon, cobalt complex **1a** or **1b** (1 mol%), ammonia borane (15.4 mg, 0.50 mmol), alkyne (0.50 mmol) and MeOH (2 mL) were added sequentially to a preheated Schlenk tube equipped with a magnetic stir bar. The reaction mixture was stirred for 0.5–40 h at room temperature. Subsequently the reaction mixture was exposed to air and CH<sub>2</sub>Cl<sub>2</sub> (5 mL) were added. An aliquot part of this solution was analyzed by gas chromatography.

**Note:** Liquid substrates were dissolved in MeOH (2 mL) before the addition to the reaction mixture.

### Substrate scope

**Table S 2.** Substrate scope.

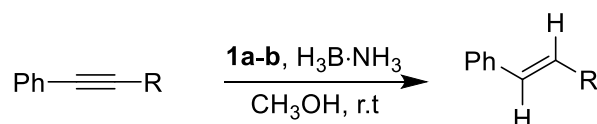

| entry          | R                                                    | 1a     |         |                                  | 1b     |         |                                 |
|----------------|------------------------------------------------------|--------|---------|----------------------------------|--------|---------|---------------------------------|
|                |                                                      | time/h | Conv./% | E/Z                              | time/h | Conv./% | E/Z                             |
| 1              | -C <sub>6</sub> H <sub>5</sub>                       | 0.5    | ≥ 95    | 100/0                            | 1      | ≥ 95    | 100/0                           |
| 2              | 2-CH <sub>3</sub> -C <sub>6</sub> H <sub>4</sub> -   | 0.5    | ≥ 95    | 99/1                             | 0.5    | ≥ 95    | 100/0                           |
| 3              | 4-CH <sub>3</sub> -C <sub>6</sub> H <sub>4</sub>     | 0.5    | ≥ 95    | 100/0                            | 1      | ≥ 95    | 100/0                           |
| 4              | 2- <i>i</i> -Pr-C <sub>6</sub> H <sub>4</sub>        | 0.5    | ≥ 95    | 95/5                             | 0.5    | ≥ 95    | 99/1                            |
| 5              | 4-OMe-C <sub>6</sub> H <sub>4</sub>                  | 0.5    | ≥ 95    | 100/0                            | 1.5    | 81      | 100/0                           |
| 6              | 4-NH <sub>2</sub> -C <sub>6</sub> H <sub>4</sub>     | 0.5    | ≥ 95    | 100/0                            | 1.5    | ≥ 95    | 100/0                           |
| 7 <sup>a</sup> | 4-C(O)CH <sub>3</sub> -C <sub>6</sub> H <sub>4</sub> | 0.5    | ≥ 95    | <sup>b</sup>                     | 0.5    | 80      | <sup>b</sup>                    |
| 8 <sup>a</sup> | 4-NO <sub>2</sub> -C <sub>6</sub> H <sub>4</sub>     | 1      | ≥ 95    | crude mixture (35%) <sup>c</sup> | 1      | 39      | crude mixture (2%) <sup>c</sup> |
| 9 <sup>a</sup> | 4-CN-C <sub>6</sub> H <sub>4</sub>                   | 1      | ≥ 95    | 100/0 (90%) <sup>c</sup>         | 1      | 79      | 25/75 (2%) <sup>c</sup>         |
| 10             | 2-CF <sub>3</sub> -C <sub>6</sub> H <sub>4</sub>     | 1      | ≥ 95    | 99/1                             | 6      | ≥ 95    | 97/3                            |
| 11             | CH <sub>3</sub>                                      | 1      | ≥ 95    | 97/3 (3%) <sup>c</sup>           | 1.5    | ≥ 95    | 97/3 (6%) <sup>c</sup>          |

Reaction conditions: Alkyne (0.50 mmol), H<sub>3</sub>B·NH<sub>3</sub> (0.50 mmol), V(MeOH) = 2.0 mL, Yields were determined by GC-Analysis. <sup>a</sup> Formation of the alkane product was observed. <sup>b</sup> In these cases, the reactions were not chemoselective for the alkyne reduction, producing a mixture of several products, containing the alcohol-alkene, the acyl-alkene, as well as the acyl-alkane (Figure S24). The exact composition of these mixtures could not be determined by GC-MS. <sup>c</sup> Yield of the alkane product.

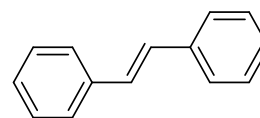

### (E)-1,2-diphenylethene

According to GP 4, cobalt catalyst **1a–b** (1 mol%) and  $\text{H}_3\text{B}\cdot\text{NH}_3$  (15.4 mg, 0.50 mmol) made to react with 1,2-diphenylethyne (89.1 mg, 0.50 mmol) in MeOH (2 mL). The product was obtained as white solid (79 mg, 0.44 mmol, 88%).  $^1\text{H NMR}$  (300 MHz,  $\text{CDCl}_3$ ):  $\delta$  7.59–7.46 (m, 4 H), 7.43–7.31 (m, 4 H), 7.30–7.22 (m, 2 H), 7.12 (s, 2 H).

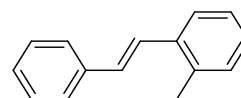

### (E)-1-methyl-2-styrylbenzene

According to GP 4, cobalt catalyst **1a–b** (1 mol%) and  $\text{H}_3\text{B}\cdot\text{NH}_3$  (15.4 mg, 0.50 mmol) made to react with 1-methyl-2-(phenylethynyl)benzene (96.1 mg, 0.50 mmol) in MeOH (2 mL). The product was obtained as colourless liquid (87 mg, 0.45 mmol, 90%). –  $^1\text{H NMR}$  (300 MHz,  $\text{CD}_2\text{Cl}_2$ ):  $\delta$  7.67 (d,  $J = 6.3$  Hz, 1 H), 7.61 (d,  $J = 8.1$  Hz, 2 H), 7.49–7.39 (m, 3 H), 7.37–7.22 (m, 4 H), 7.09 (d,  $J = 16.2$  Hz, 1 H), 2.50 (s, 3 H).

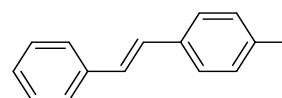

### (E)-1-methyl-4-styrylbenzene

According to GP 4, cobalt catalyst **1a–b** (1 mol%) and  $\text{H}_3\text{B}\cdot\text{NH}_3$  (15.4 mg, 0.50 mmol) made to react with 1-methyl-4-(phenylethynyl)benzene (96.1 mg, 0.50 mmol) in MeOH (2 mL). The product was obtained as yellow solid (80 mg, 0.41 mmol, 82%). –  $^1\text{H NMR}$  (300 MHz,  $\text{CD}_2\text{Cl}_2$ ):  $\delta$  7.55–7.49 (m, 2 H), 7.43 (d,  $J = 8.2$  Hz, 2 H), 7.40–7.31 (m, 2 H), 7.30–7.21 (m, 1 H), 7.18 (d,  $J = 7.8$  Hz, 2 H), 7.10 (d,  $J = 1.4$  Hz, 2 H), 2.36 (s, 3 H,  $\text{CH}_3$ ).

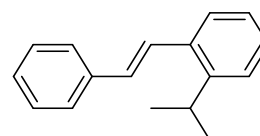

### (E)-1-isopropyl-2-styrylbenzene

According to GP 4, cobalt catalyst **1a–b** (1 mol%) and  $\text{H}_3\text{B}\cdot\text{NH}_3$  (15.4 mg, 0.50 mmol) made to react with 1-isopropyl-2-(phenylethynyl)benzene (120 mg, 0.50 mmol) in MeOH (2 mL). The product was obtained as colorless liquid (93 mg, 0.42 mmol, 84%). –  $^1\text{H NMR}$  (300 MHz,  $\text{CD}_2\text{Cl}_2$ ):  $\delta$  7.76–7.49 (m, 4 H), 7.49–7.19 (m, 6 H), 7.03 (d,  $J = 16.0$  Hz, 1 H), 3.43 (hept,  $J = 6.8$  Hz, 1 H), 1.33 (d,  $J = 6.9$  Hz, 6 H).

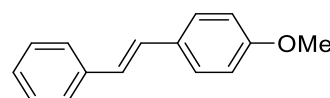

### (E)-1-methoxy-4-styrylbenzene

According to GP 4, cobalt catalyst **1a–b** (1 mol%) and  $\text{H}_3\text{B}\cdot\text{NH}_3$  (15.4 mg, 0.50 mmol) made to react with 1-methoxy-4-(phenylethynyl)benzene (104 mg, 0.50 mmol) in MeOH (2 mL). The product was obtained as off white solid (72 mg, 0.34 mmol, 68%). –  $^1\text{H NMR}$  (400 MHz,  $\text{CD}_2\text{Cl}_2$ ):  $\delta$  7.51–7.43 (m, 4 H), 7.35 (t,  $J = 7.6$  Hz, 2 H), 7.29–7.18 (m, 1 H), 7.09 (d,  $J = 16.4$  Hz, 1 H), 6.99 (d,  $J = 16.3$  Hz, 1 H), 6.91 (d,  $J = 8.8$  Hz, 2 H), 3.81 (s, 3 H).

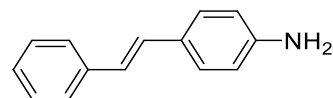

### (E)-4-styrylaniline

According to GP 4, cobalt catalyst **1a–b** (1 mol%) and  $\text{H}_3\text{B}\cdot\text{NH}_3$  (89.1 mg, 0.50 mmol) made to react with 4-(phenylethynyl)aniline (96.6 mg, 0.50 mmol) in MeOH (2 mL). The product was obtained as yellow solid (82 mg, 0.42 mmol, 84%). –  $^1\text{H NMR}$  (300 MHz,  $\text{CD}_2\text{Cl}_2$ ):  $\delta$  7.48 (d,  $J$  = 7.2 Hz, 2 H), 7.42–7.29 (m, 4 H), 7.25–7.15 (m, 1 H), 7.04 (d,  $J$  = 16.3 Hz, 1 H), 6.92 (d,  $J$  = 16.3 Hz, 1 H), 6.67 (d,  $J$  = 8.5 Hz, 2 H), 3.79 (br. s, 2 H).

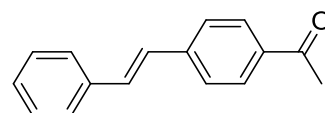

### (E)-1-(4-styrylphenyl)ethan-1-one

According to GP 4, cobalt catalyst **1a–b** (1 mol%) and  $\text{H}_3\text{B}\cdot\text{NH}_3$  (15.4 mg, 0.50 mmol) made to react with 1-(4-(phenylethynyl)phenyl)ethan-1-one (110 mg, 0.50 mmol) in MeOH (2 mL). The product was obtained as off white solid, including several hydrogenation products (see figure S 24) as impurities (107 mg). – GC/MS:  $m/z$  195, 225, 227.

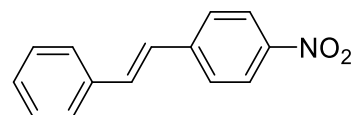

### (E)-1-nitro-4-styrylbenzene

According to GP 4, cobalt catalyst **1a–b** (1 mol%) and  $\text{H}_3\text{B}\cdot\text{NH}_3$  (89.1 mg, 0.50 mmol) made to react with 1-nitro-4-(phenylethynyl)benzene (111 mg, 0.50 mmol) in MeOH (2 mL). The reaction mixture contains further hydrogenation products. – GC/MS:  $m/z$  195, 205, 225, 227.

**In case of precatalyst 1a:** Overreduction to the corresponding alkane (30–35%) was observed. The educt decomposed in several runs after the addition of MeOH. **Caution:** Evolution of nitrous gases was observed!

**In case of precatalyst 1b:** The product was obtained as brown oil (87 mg), containing the (*E*)/(*Z*)-isomer and the full hydrogenation product 1-nitro-4-phenethylbenzene (3–8%).

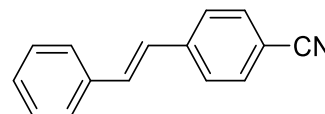

### (E)-4-styrylbenzotrile

According to GP 4, cobalt catalyst **1a–b** (1 mol%) and  $\text{H}_3\text{B}\cdot\text{NH}_3$  (15.4 mg, 0.50 mmol) made to react with 4-(phenylethynyl)benzotrile (102.6 mg, 0.50 mmol) in MeOH (2 mL).

**In case of precatalyst 1a:** Overreduction to the corresponding alkane was observed (see Figure S 26).

**Table S 3.** Results of the TSH with **1a** and *p*-CN-C<sub>6</sub>H<sub>4</sub>C≡CPh.

| entry    | time / h | Conv. / % | <i>E/Z</i> | Yield alkane / % |
|----------|----------|-----------|------------|------------------|
| <b>1</b> | 0.5      | ≥ 95      | 100/0      | 78               |
| <b>2</b> | 0.5      | ≥ 95      | 100/0      | 88               |
| <b>3</b> | 1        | ≥ 95      | 100/0      | 90               |
| <b>4</b> | 1        | ≥ 95      | 100/0      | 85               |
| <b>5</b> | 0.5      | ≥ 95      | 100/0      | 78               |

Reaction conditions: Alkyne (0.50 mmol), H<sub>3</sub>B·NH<sub>3</sub> (0.50 mmol), V(MeOH) = 2.0 mL.

**In case of precatalyst 1b:** (*E*)/(*Z*)-mixture of the corresponding product was observed (figure S 27). Overreduction to the corresponding alkane (3–9%) was observed.

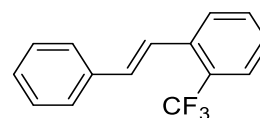

#### **(*E*)-1-styryl-2-(trifluoromethyl)benzene**

According to GP 4, cobalt catalyst **1a–b** (1 mol%) and H<sub>3</sub>B·NH<sub>3</sub> (15.4 mg, 0.50 mmol) made to react with 1-(phenylethynyl)-2-(trifluoromethyl)benzene (123 mg, 0.50 mmol) in MeOH (2 mL). The product was obtained as yellow liquid (106 mg, 0.43 mmol, 85%). – <sup>1</sup>H NMR (300 MHz, CDCl<sub>3</sub>): δ 7.74 (d, *J* = 7.9 Hz, 1 H), 7.63 (d, *J* = 7.8 Hz, 1 H), 7.57–7.40 (m, 4 H), 7.40–7.14 (m, 4 H), 7.04 (d, *J* = 16.1 Hz, 1 H).

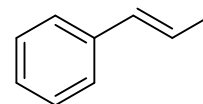

#### **(*E*)-prop-1-en-1-ylbenzene**

According to GP 4, cobalt catalyst **1a–b** (1 mol%) and H<sub>3</sub>B·NH<sub>3</sub> (15.4 mg, 0.50 mmol) made to react with prop-1-yn-1-ylbenzene (62.6 μL, 58.1 mg, 0.50 mmol) in MeOH (2 mL). The product was obtained as colorless oil (39 mg, 0.33 mmol, 66%). – <sup>1</sup>H NMR (300 MHz, CD<sub>2</sub>Cl<sub>2</sub>): δ 7.39–7.25 (m, 4 H), 7.24–7.15 (m, 1 H), 6.51–6.36 (m, 1 H), 6.35–6.20 (m, 1 H), 1.90 (dd, *J* = 6.4, 1.5 Hz, 3 H).

## NMR spectra

NMR spectra of alkynes

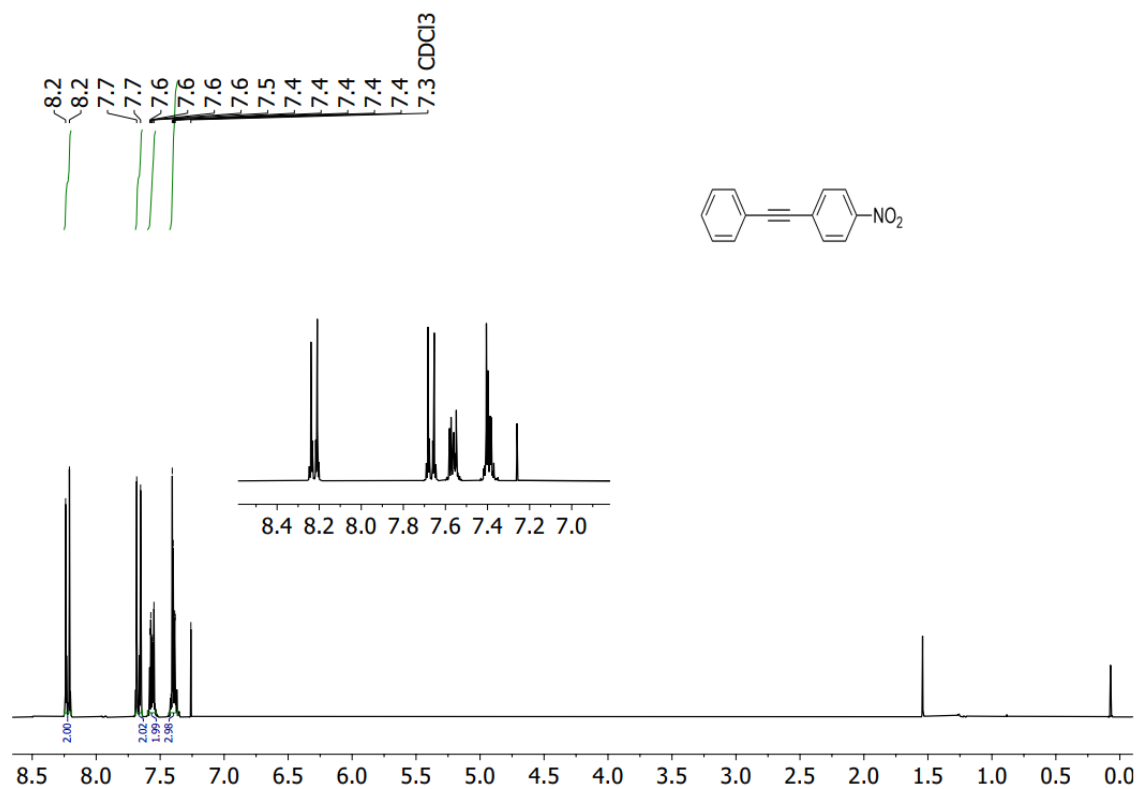

Figure S 9. <sup>1</sup>H NMR spectrum of *p*-NO<sub>2</sub>-C<sub>6</sub>H<sub>4</sub>C≡CPh (CDCl<sub>3</sub>, 25 °C).

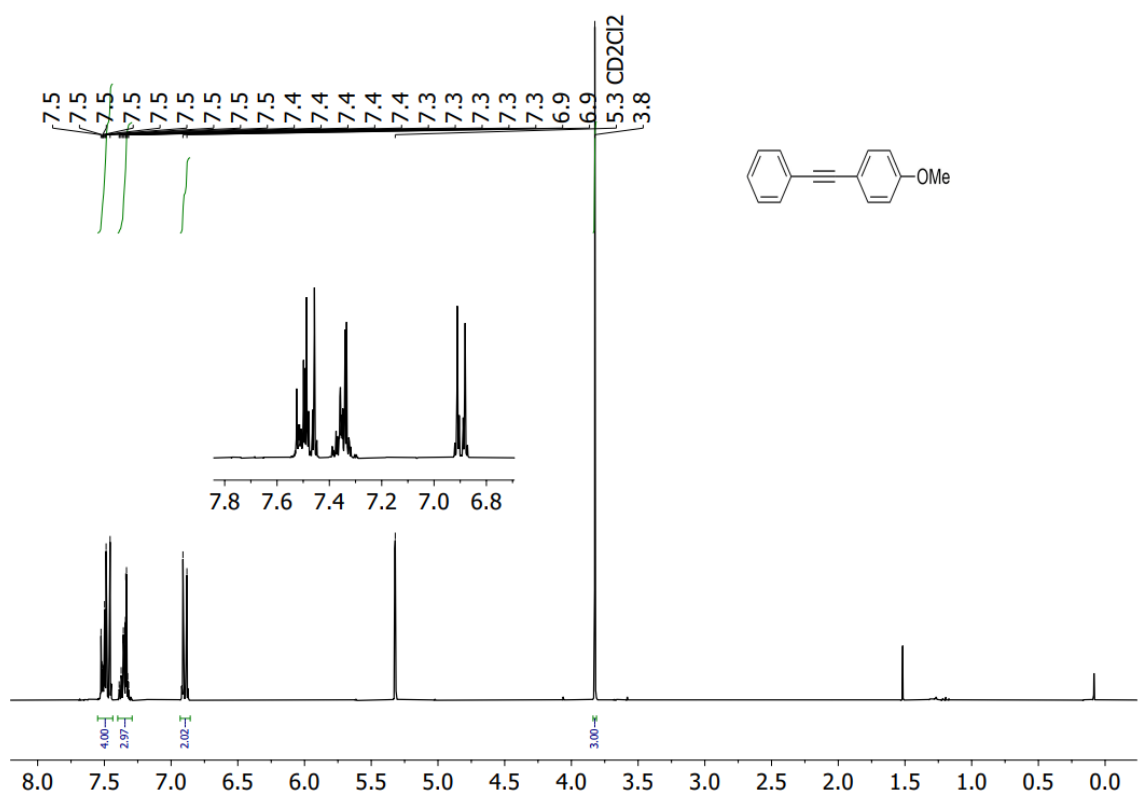

Figure S 10. <sup>1</sup>H NMR spectrum of *p*-OMe-C<sub>6</sub>H<sub>4</sub>C≡CPh (CDCl<sub>3</sub>, 25 °C).



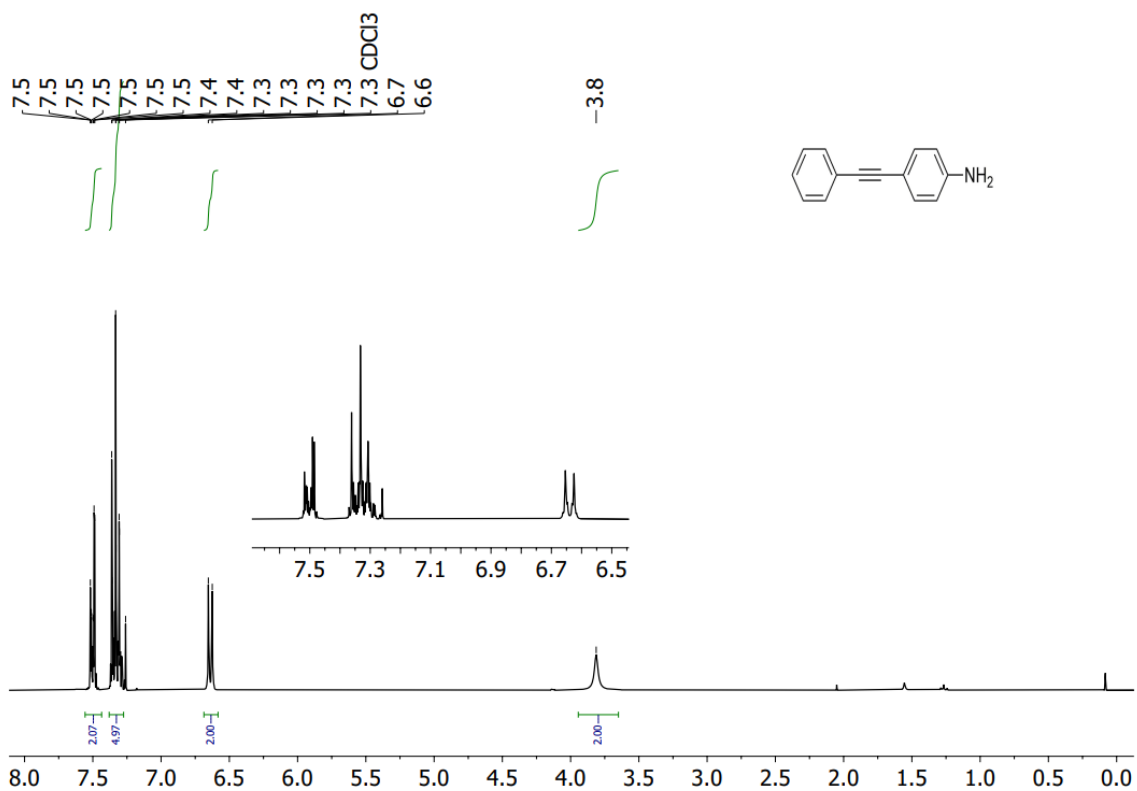

Figure S 11.  $^1\text{H}$  NMR spectrum of  $p\text{-NH}_2\text{-C}_6\text{H}_4\text{C}\equiv\text{CPh}$  ( $\text{CDCl}_3$ ,  $25^\circ\text{C}$ ).

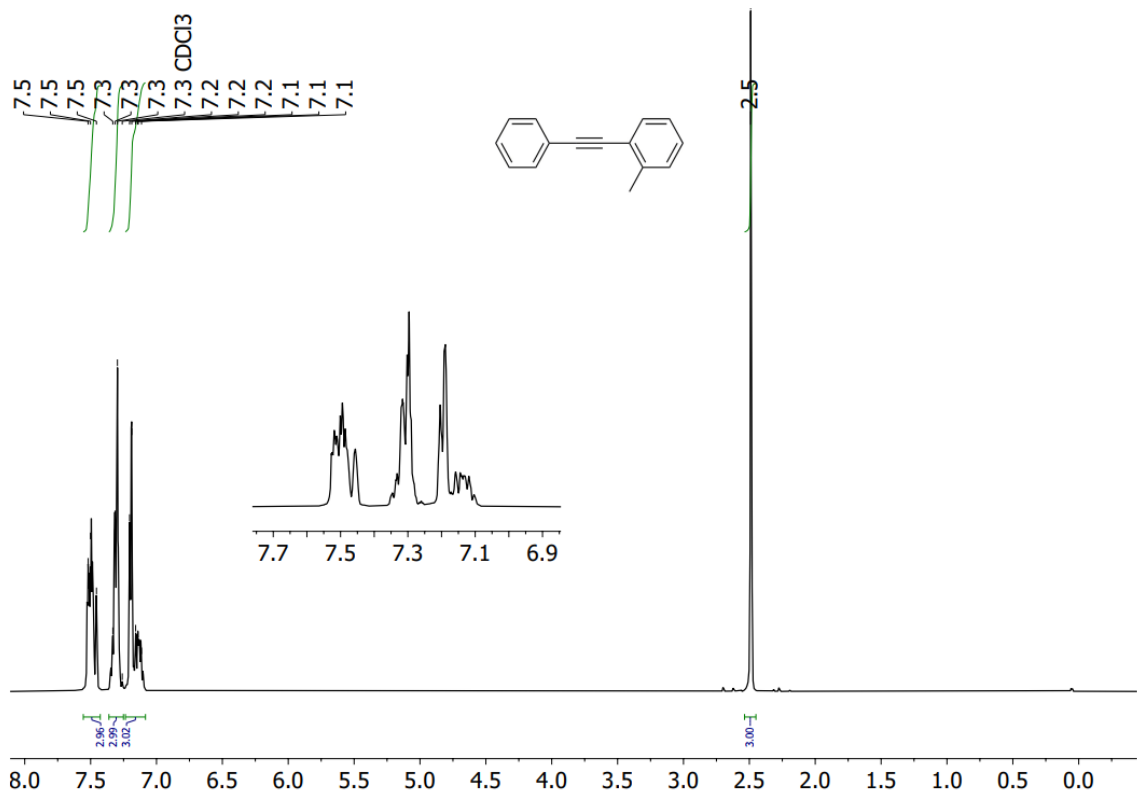

Figure S 12.  $^1\text{H}$  NMR spectrum of  $o\text{-CH}_3\text{-C}_6\text{H}_4\text{C}\equiv\text{CPh}$  ( $\text{CDCl}_3$ ,  $25^\circ\text{C}$ ).

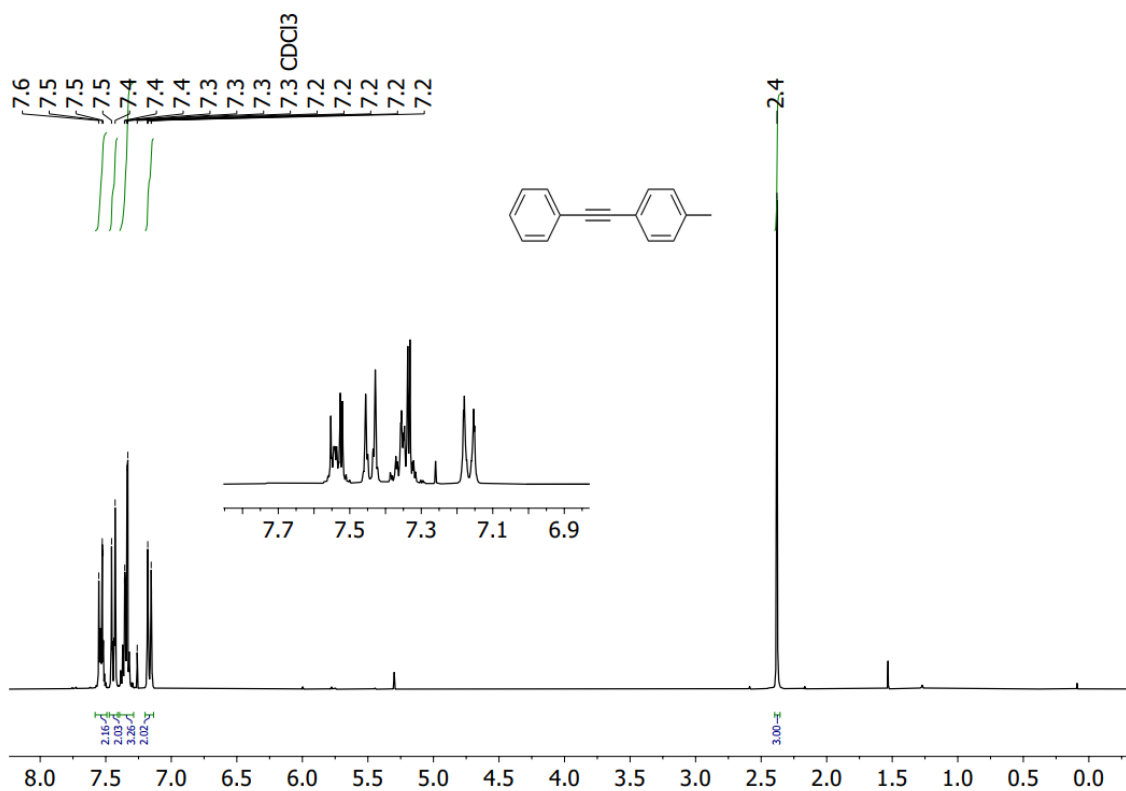

**Figure S 13.** <sup>1</sup>H NMR spectrum of *p*-CH<sub>3</sub>-C<sub>6</sub>H<sub>4</sub>C≡CPh (CDCl<sub>3</sub>, 25 °C).

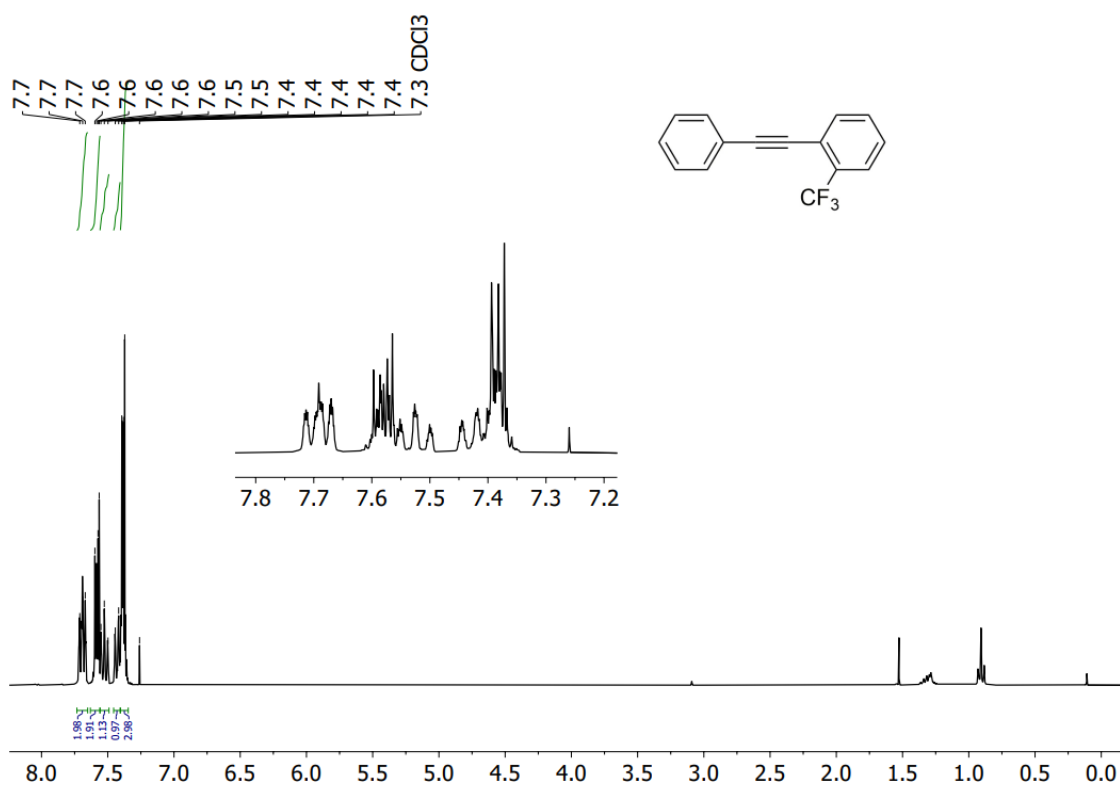

**Figure S 14.** <sup>1</sup>H NMR spectrum of *o*-CF<sub>3</sub>-C<sub>6</sub>H<sub>4</sub>C≡CPh (CDCl<sub>3</sub>, 25 °C).

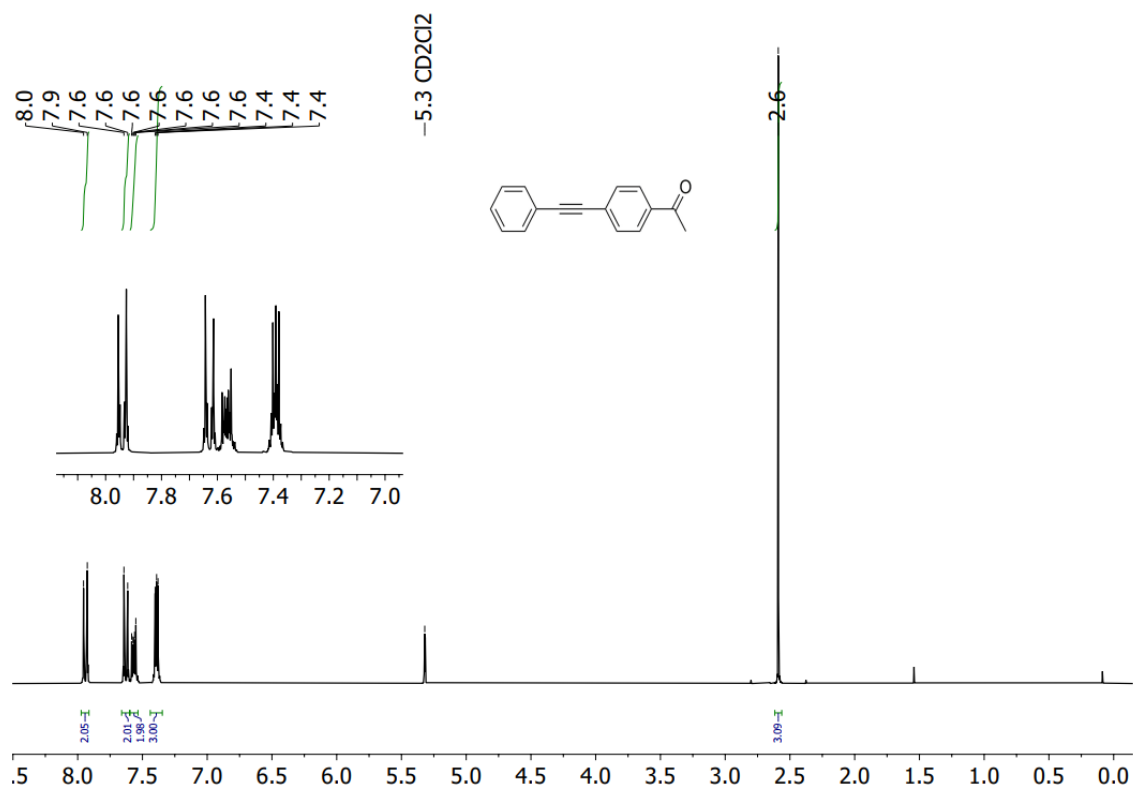

**Figure S 15.** <sup>1</sup>H NMR spectrum of *p*-C(O)CH<sub>3</sub>-C<sub>6</sub>H<sub>4</sub>C≡CPh (CD<sub>2</sub>Cl<sub>2</sub>, 25 °C).

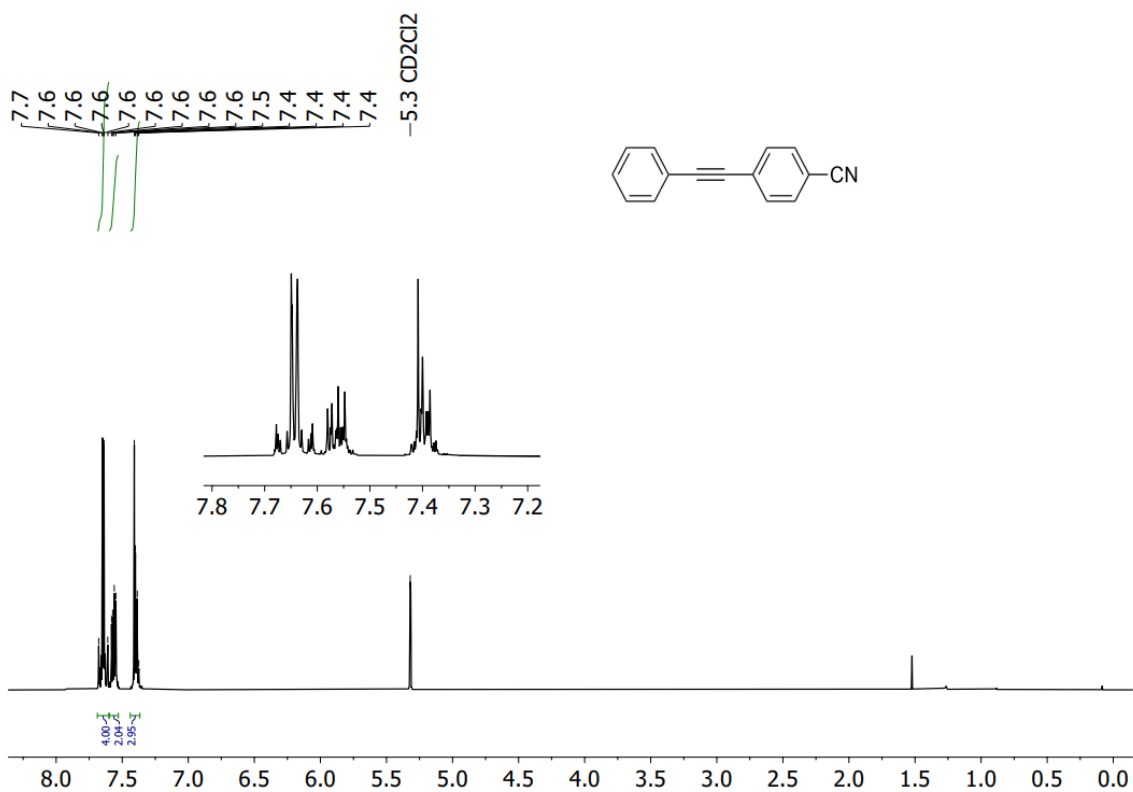

**Figure S 16.** <sup>1</sup>H NMR spectrum of *p*-CN-C<sub>6</sub>H<sub>4</sub>C≡CPh (CD<sub>2</sub>Cl<sub>2</sub>, 25 °C).

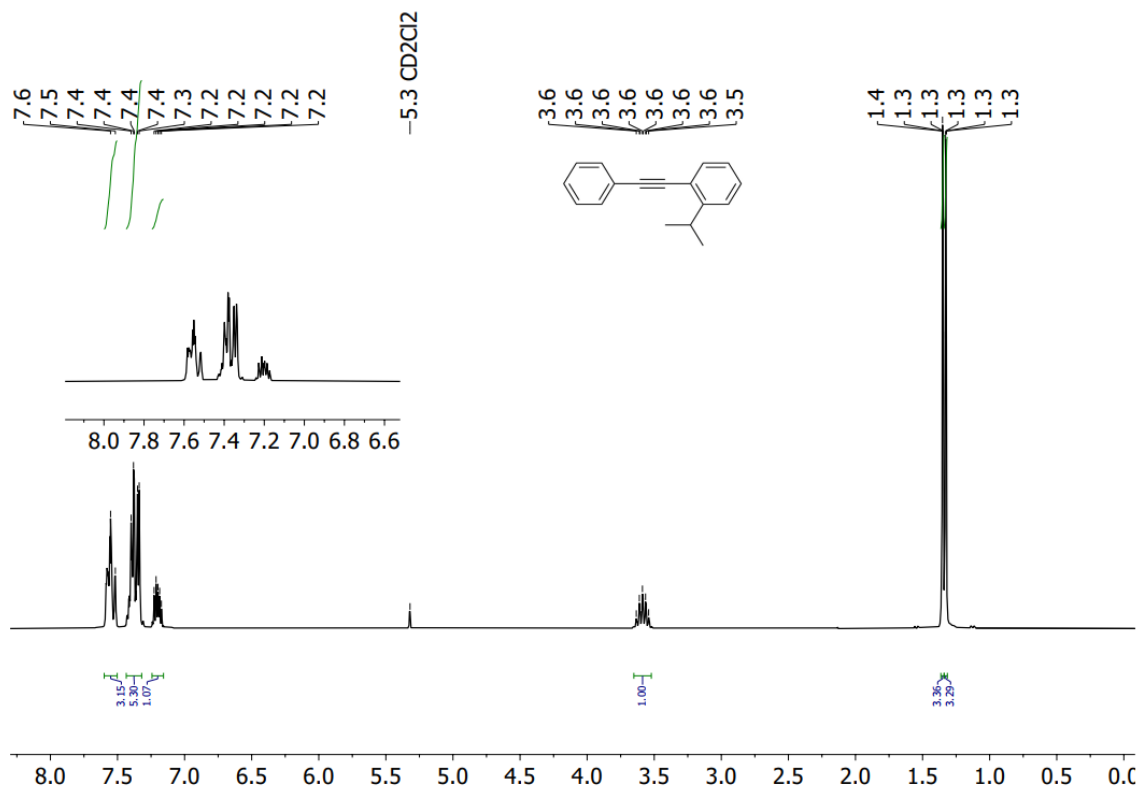

**Figure S 17.**  $^1\text{H}$  NMR spectrum of *o*-*i*-Pr- $\text{C}_6\text{H}_4\text{C}\equiv\text{CPh}$  ( $\text{CD}_2\text{Cl}_2$ , 25 °C).

NMR spectra of alkenes

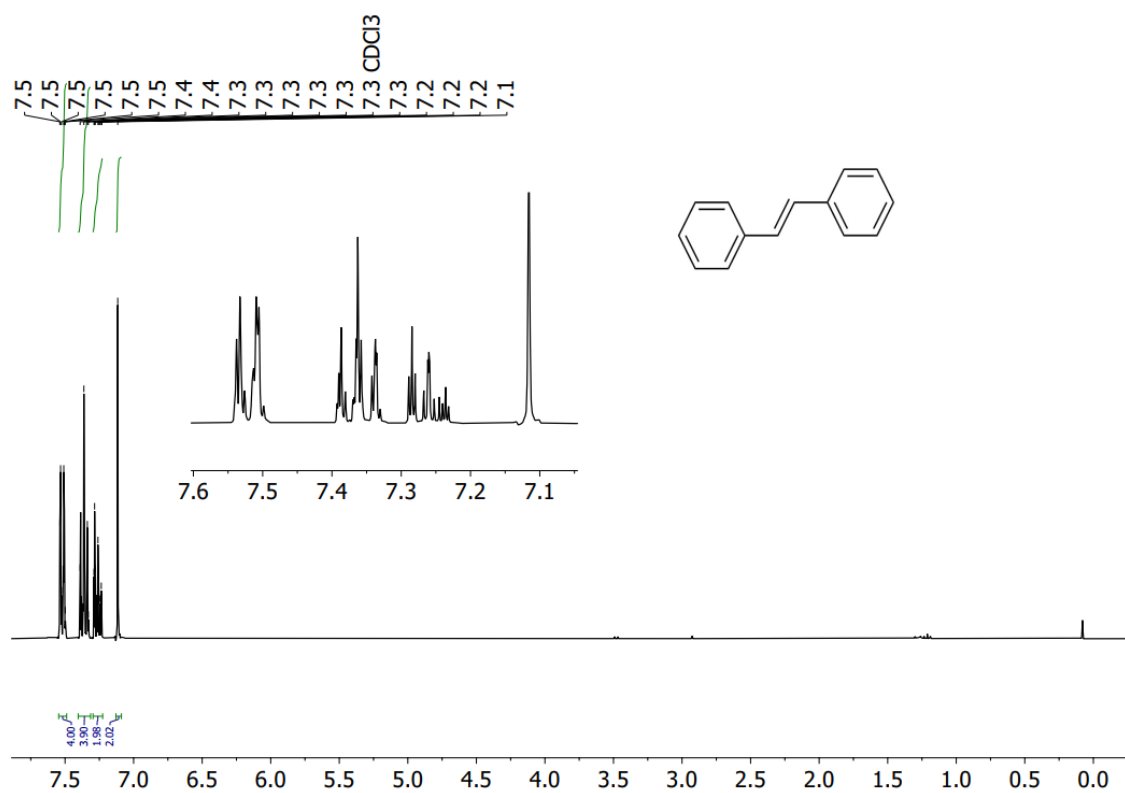

Figure S 18.  $^1\text{H}$  NMR spectrum of  $\text{PhCH}=\text{CHPh}$  ( $\text{CDCl}_3$ ,  $25^\circ\text{C}$ ).

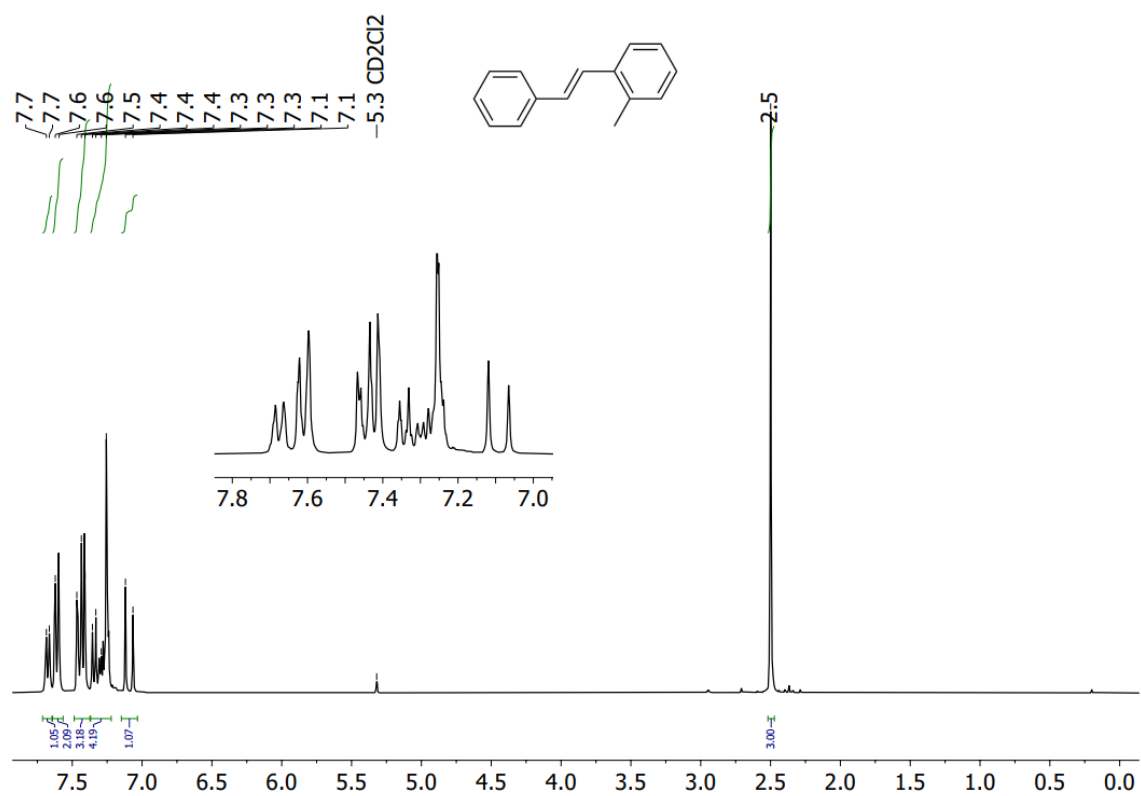

Figure S 19.  $^1\text{H}$  NMR spectrum of  $o\text{-CH}_3\text{-C}_6\text{H}_4\text{CH}=\text{CHPh}$  ( $\text{CD}_2\text{Cl}_2$ ,  $25^\circ\text{C}$ ).

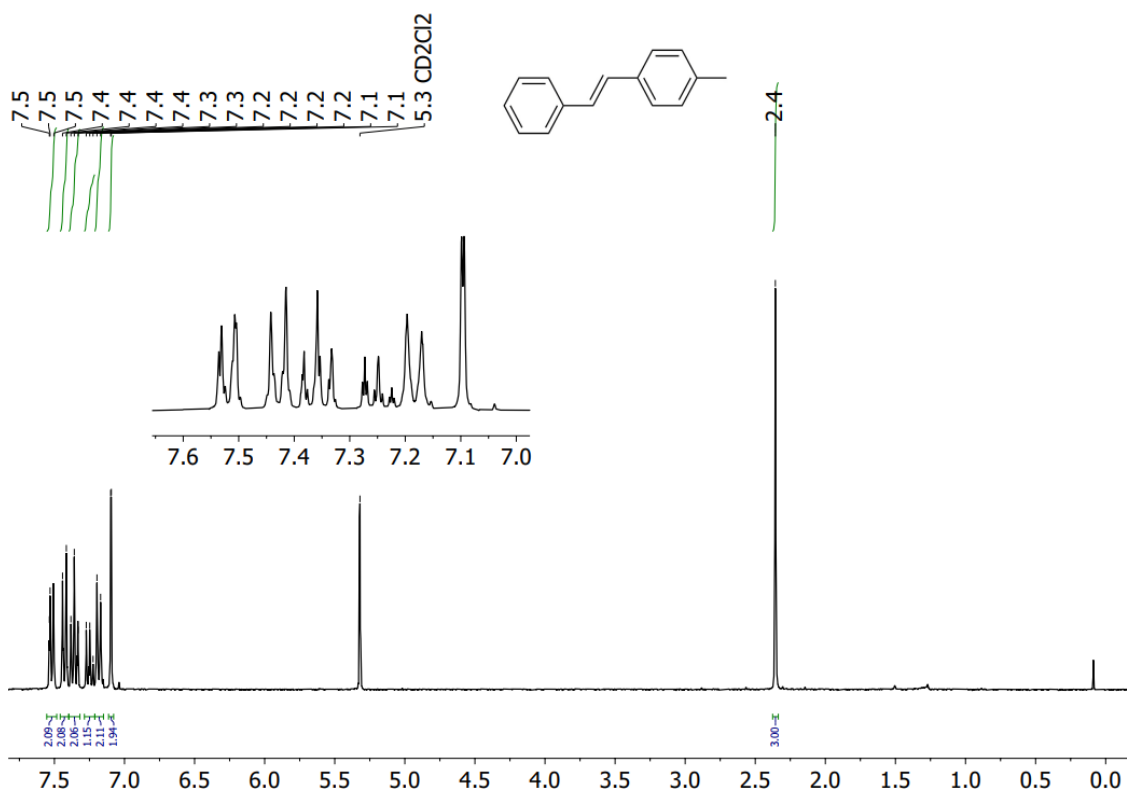

**Figure S 20.** <sup>1</sup>H NMR spectrum of *p*-CH<sub>3</sub>-C<sub>6</sub>H<sub>4</sub>CH=CHPh (CD<sub>2</sub>Cl<sub>2</sub>, 25 °C).

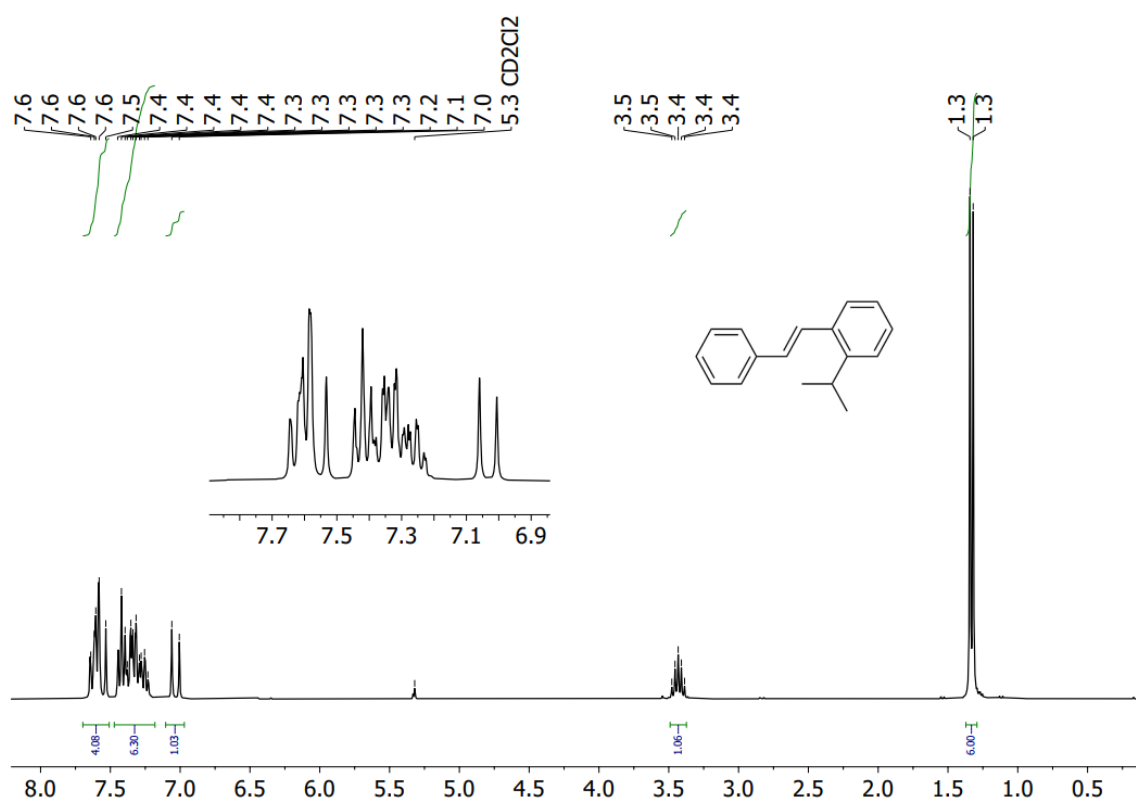

**Figure S 21.** <sup>1</sup>H NMR spectrum of *o*-*i*-Pr-C<sub>6</sub>H<sub>4</sub>CH=CHPh (CD<sub>2</sub>Cl<sub>2</sub>, 25 °C).

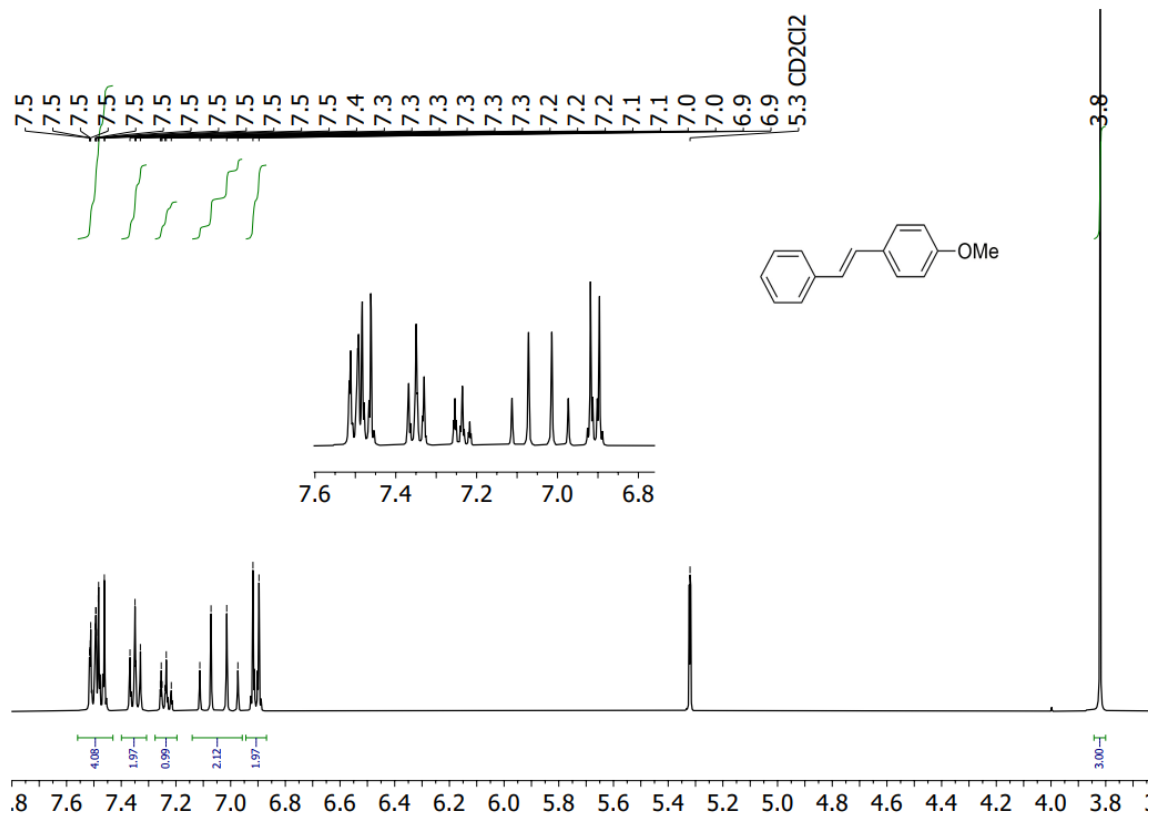

**Figure S 22.** <sup>1</sup>H NMR spectrum of *p*-OMe-C<sub>6</sub>H<sub>4</sub>CH=CHPh (CD<sub>2</sub>Cl<sub>2</sub>, 25 °C).

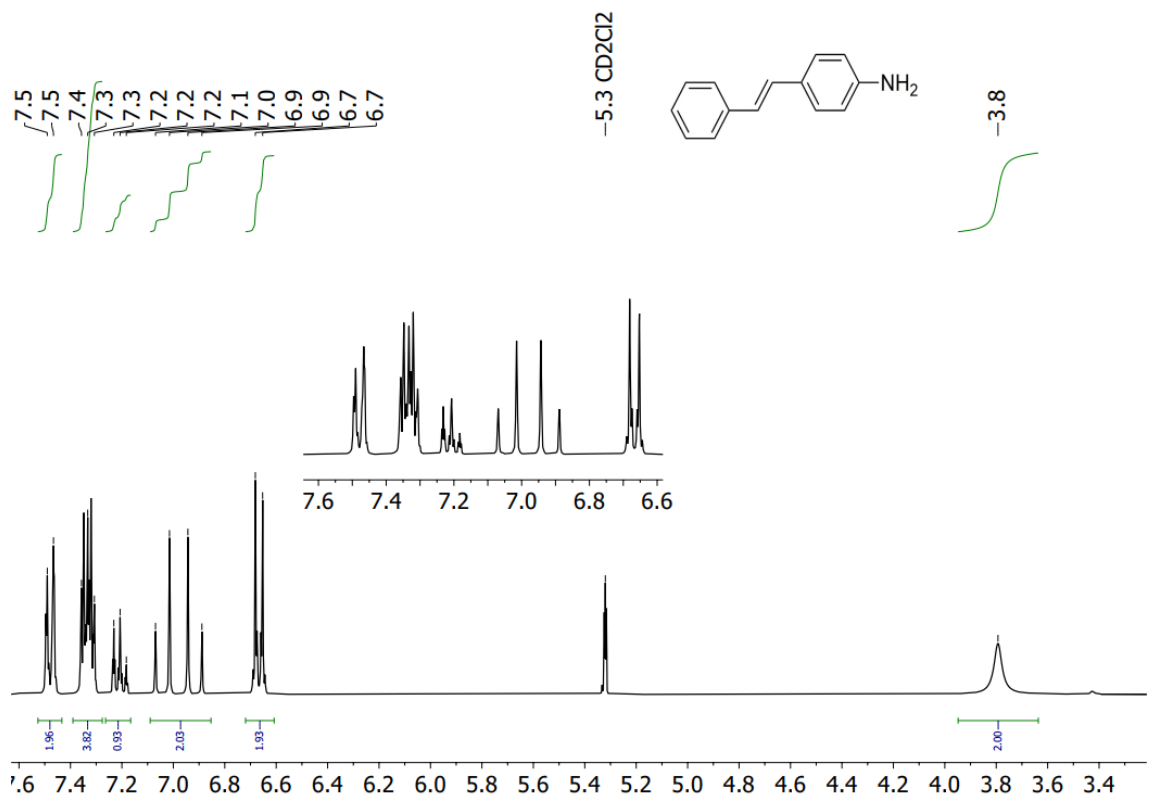

**Figure S 23.** <sup>1</sup>H NMR spectrum of *p*-NH<sub>2</sub>-C<sub>6</sub>H<sub>4</sub>CH=CHPh (CD<sub>2</sub>Cl<sub>2</sub>, 25 °C).

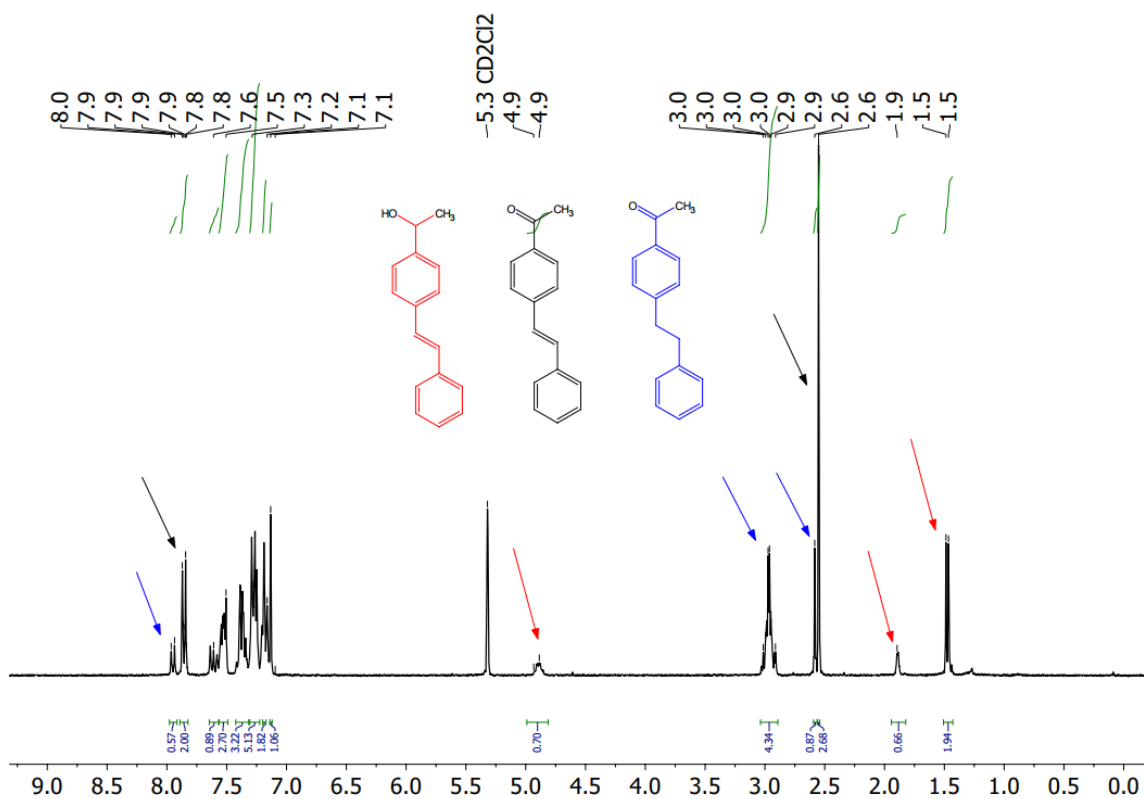

**Figure S 24.** <sup>1</sup>H NMR spectrum of a mixture obtained with **1b** after TSH of *p*-C(O)CH<sub>3</sub>-C<sub>6</sub>H<sub>4</sub>C≡CPh (CD<sub>2</sub>Cl<sub>2</sub>, 25 °C).

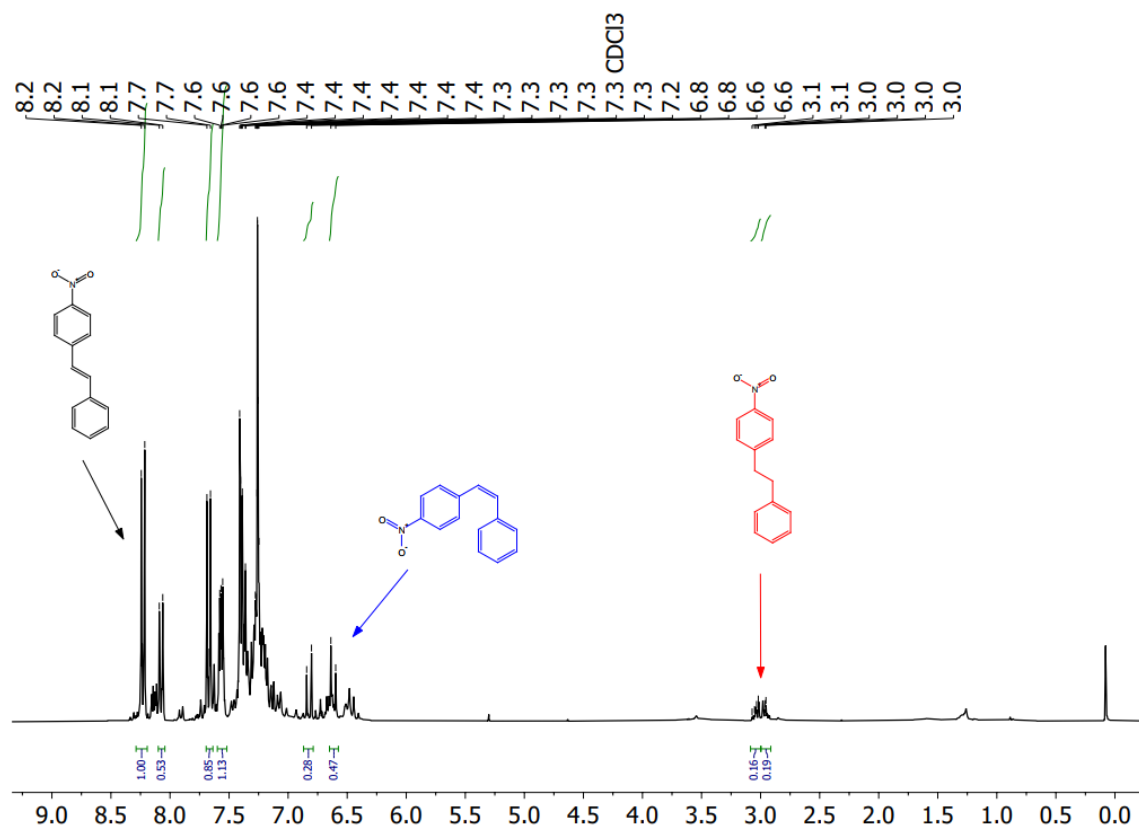

**Figure S 25.** <sup>1</sup>H NMR spectrum of a mixture obtained with **1b** after TSH of *p*-NO<sub>2</sub>-C<sub>6</sub>H<sub>4</sub>C≡CPh (CDCl<sub>3</sub>, 25 °C). Yield of the corresponding alkane due overreduction: 8%.



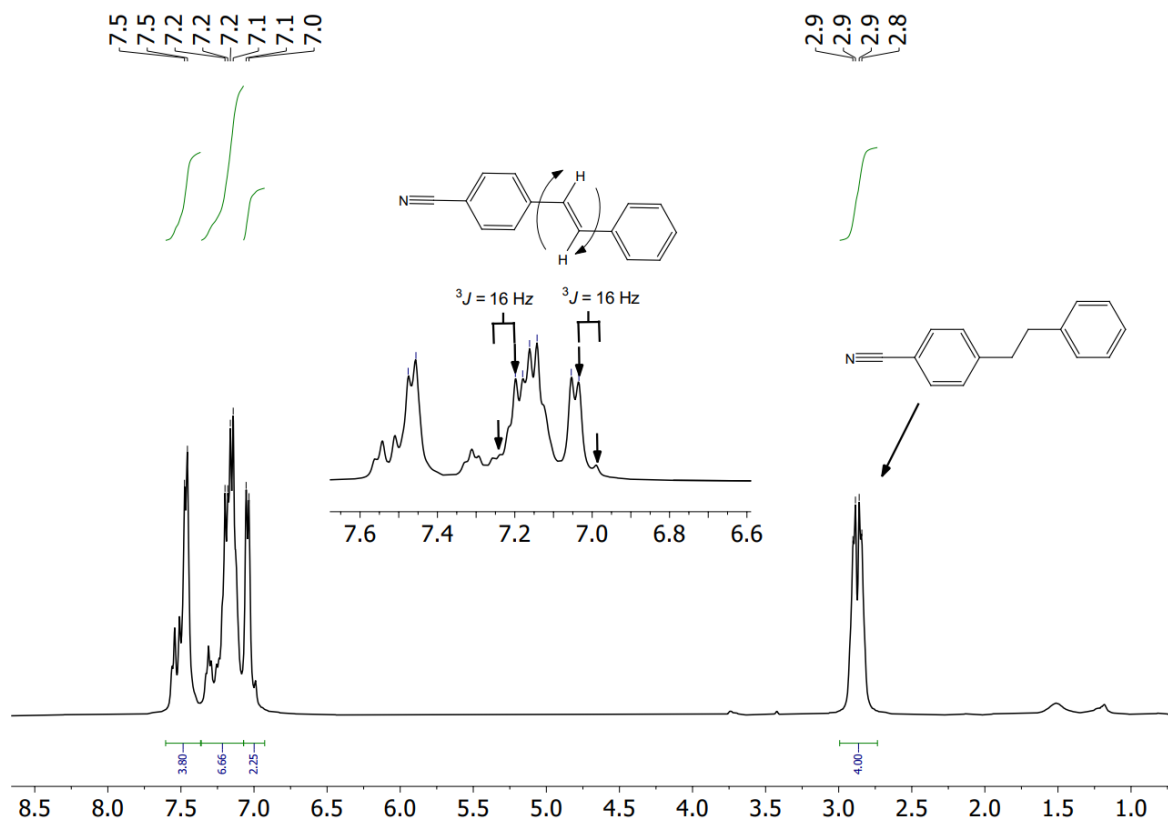

**Figure S 26.** <sup>1</sup>H NMR spectrum of a mixture after TSH with **1a** and *p*-CN-C<sub>6</sub>H<sub>4</sub>C≡CPh (CDCl<sub>3</sub>, 25 °C). Yield of the corresponding alkane due overreduction: 78%.

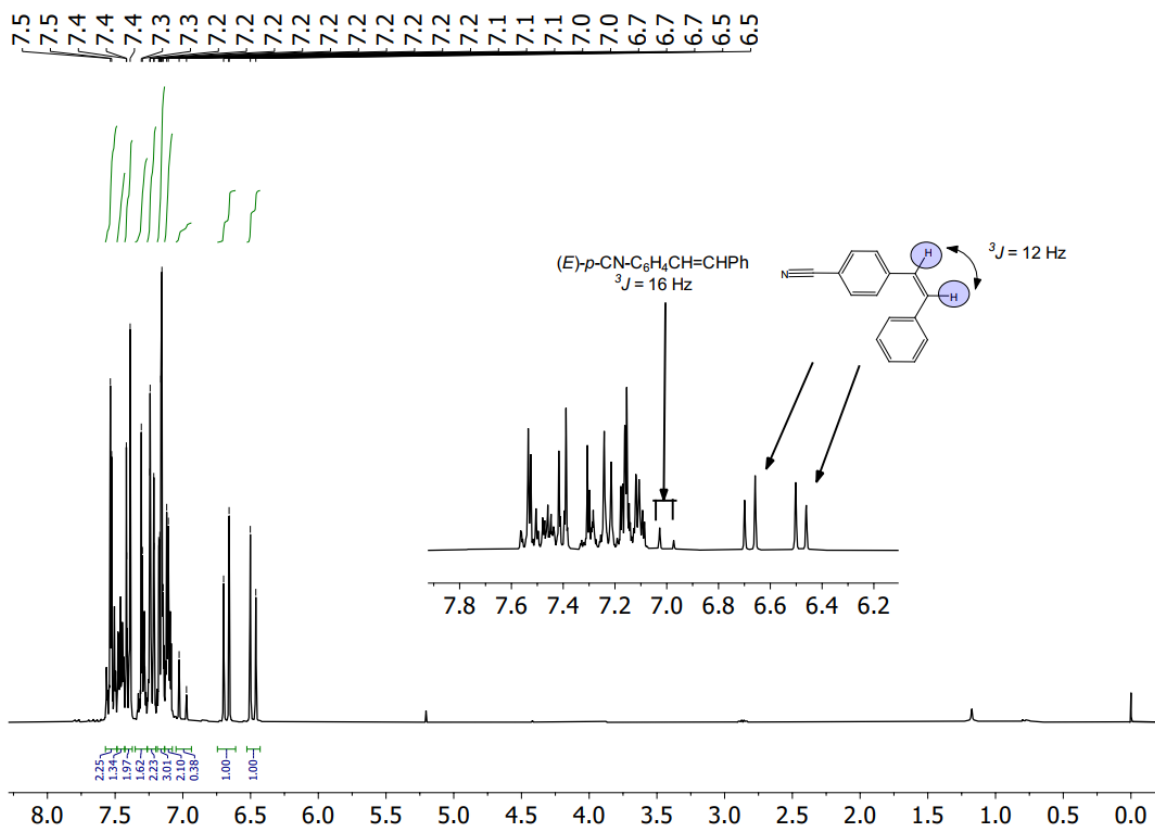

**Figure S 27.** <sup>1</sup>H NMR spectrum of a mixture after TSH with **1b** and *p*-CN-C<sub>6</sub>H<sub>4</sub>C≡CPh (CDCl<sub>3</sub>, 25 °C). Yield of the corresponding alkane due overreduction: 2–3%.

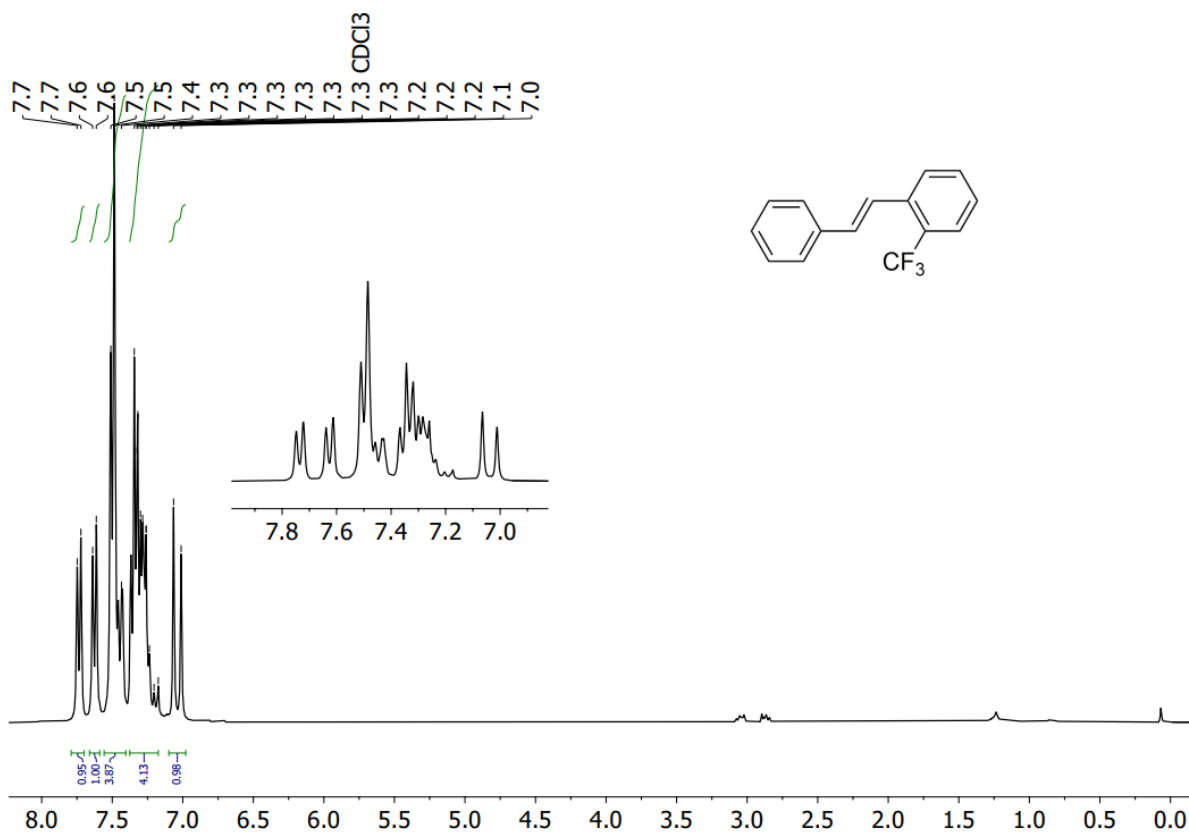

**Figure S 28.** <sup>1</sup>H NMR spectrum of *o*-CF<sub>3</sub>-C<sub>6</sub>H<sub>4</sub>CH=CHPh (CDCl<sub>3</sub>, 25 °C).

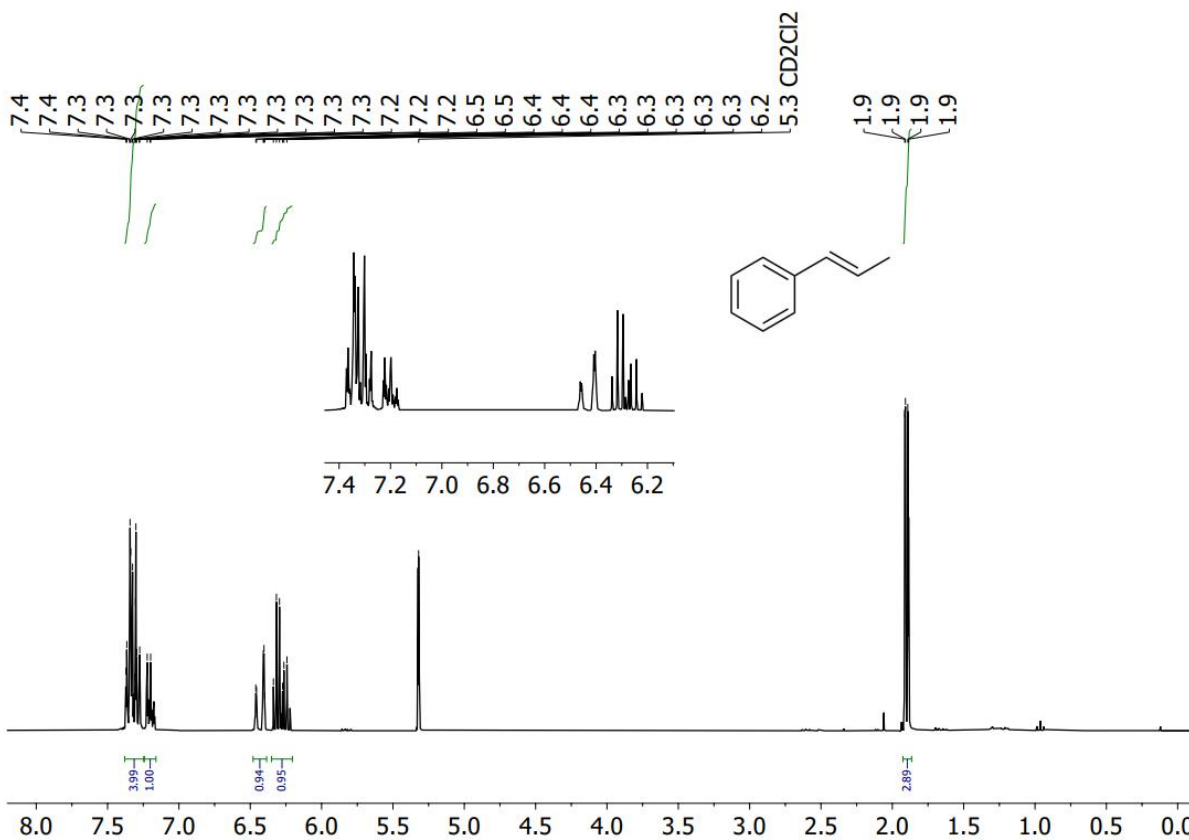

**Figure S 29.** <sup>1</sup>H NMR spectrum of C<sub>6</sub>H<sub>5</sub>CH=CHCH<sub>3</sub> (CD<sub>2</sub>Cl<sub>2</sub>, 25 °C).

## Mechanistic investigations

### EPR spectroscopy

EPR measurements were recorded on a Bruker EMX CW-micro X-band spectrometer with a microwave power  $\approx 6.9$  mW, a modulation frequency of 100 kHz and modulation amplitude up to 5 G. The EPR spectrometer is equipped with a variable temperature control unit including a liquid  $N_2$  cryostat and a temperature controller for recording the EPR spectra at low temperature down to 96K.  $g$  values were calculated using the equation  $h\nu = g\beta B_0$  with  $\beta$ ,  $B_0$  and  $\nu$  being the Bohr magneton, resonance field and frequency, respectively. Calibration of the  $g$  values was performed using a DPPH standard ( $g = 2.0036 \pm 0.0004$ ).

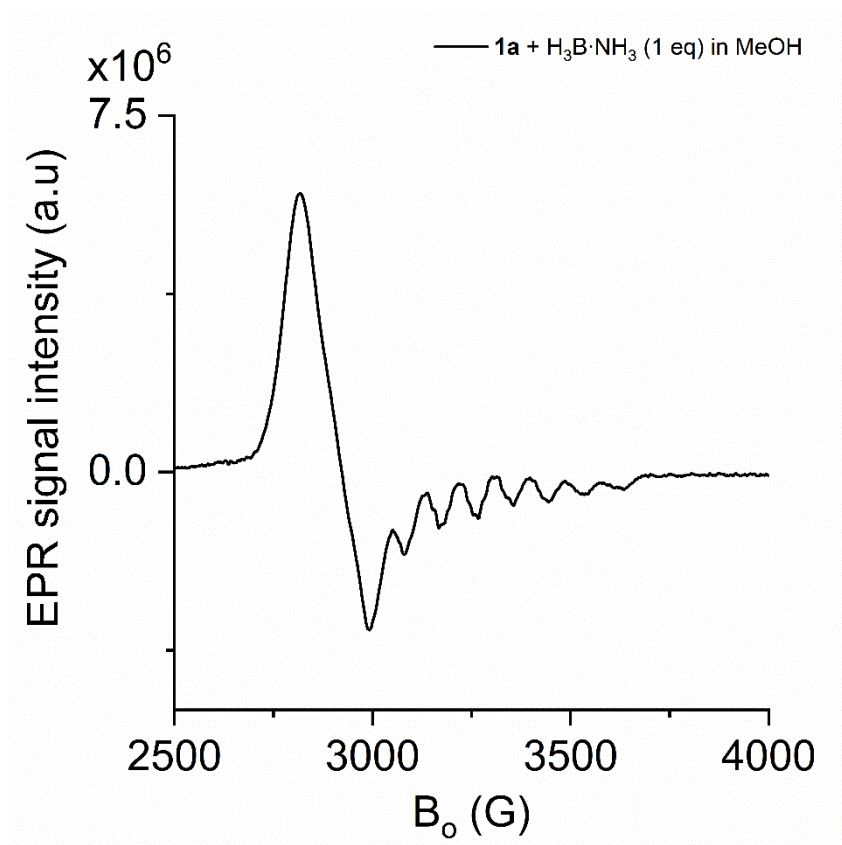

**Figure S 30.** EPR spectrum of **1a** with  $H_3B \cdot NH_3$  (1 eq.) measured at 97K.

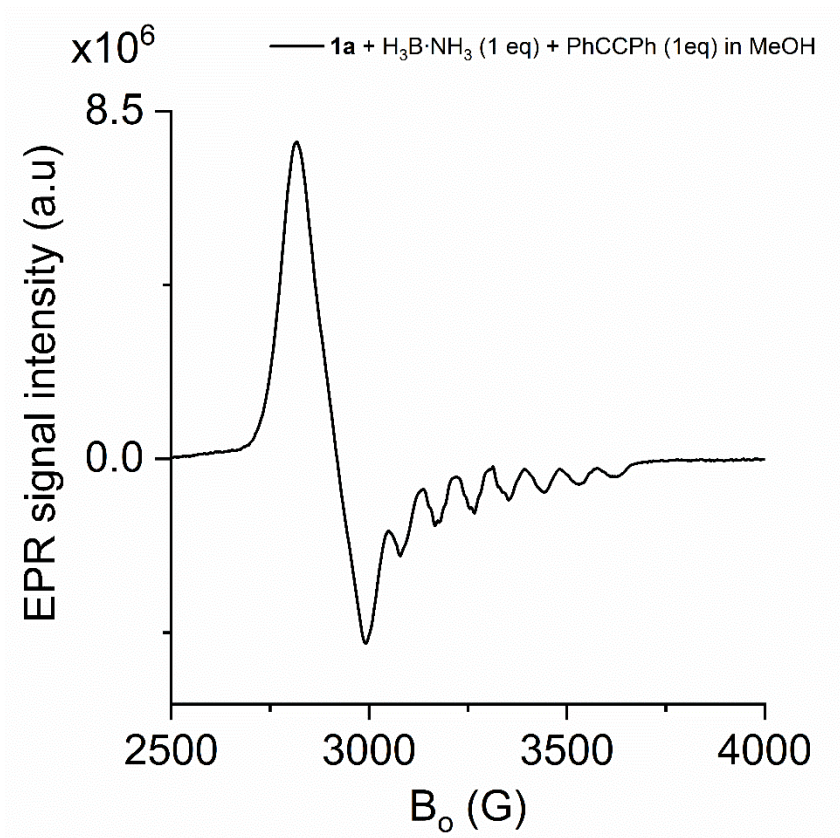

**Figure S 31.** EPR spectrum of **1a** with H<sub>3</sub>B·NH<sub>3</sub> (1 eq.) and PhCCPh (1 eq.) measured at 97K.

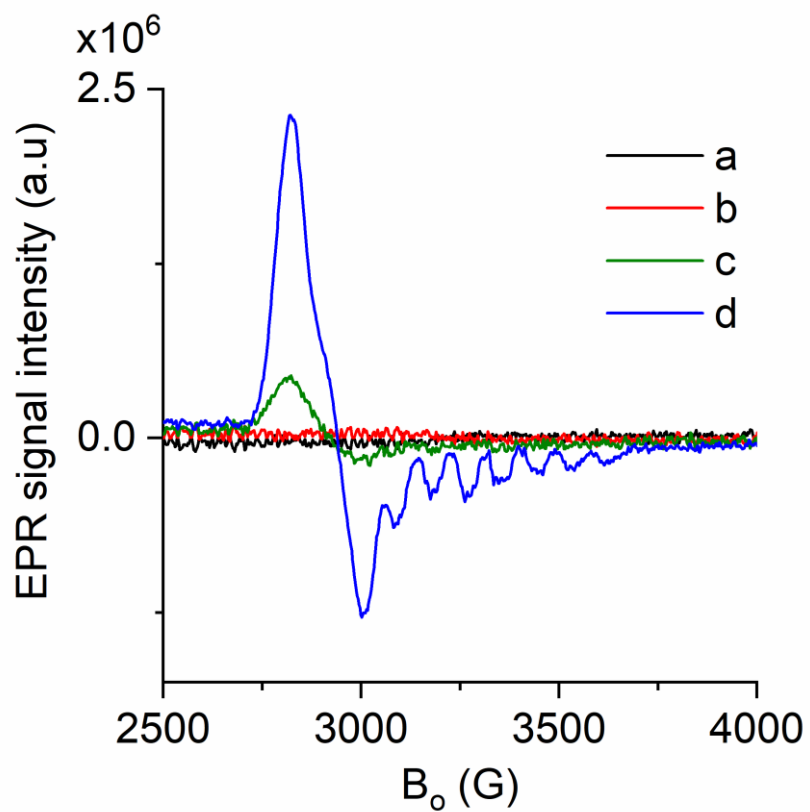

**Figure S 32.** EPR Spectra measured at 108K of a) **1a** in toluene; b) after addition of 2 equivalents of MeOH to (a); c) after addition of  $H_3B \cdot NH_3$  to (b); d) after addition an excess of MeOH to (a).

## Deuterium labelling studies

### General procedure (GP3)

Under an atmosphere of argon, cobalt complex **1a** (2.45 mg, 1 mol%), B-D, N-D or fully deuterated ammonia borane (0.5 mmol) were stirred together with diphenylacetylene (89.1 mg, 0.50 mmol) in methanol (*-d*<sub>1</sub>, *-d*<sub>3</sub>, *-d*<sub>4</sub>) at 50 °C overnight. After the reaction, the mixture was exposed to air and CH<sub>2</sub>Cl<sub>2</sub> (5 mL) was added. The solution was filtered through a pad of silica and washed with EtOAc (3 x 5 mL). Subsequently the solvent was removed under reduced pressure to give (*E*)-Stilbene, the mono- or di-deuterated product.

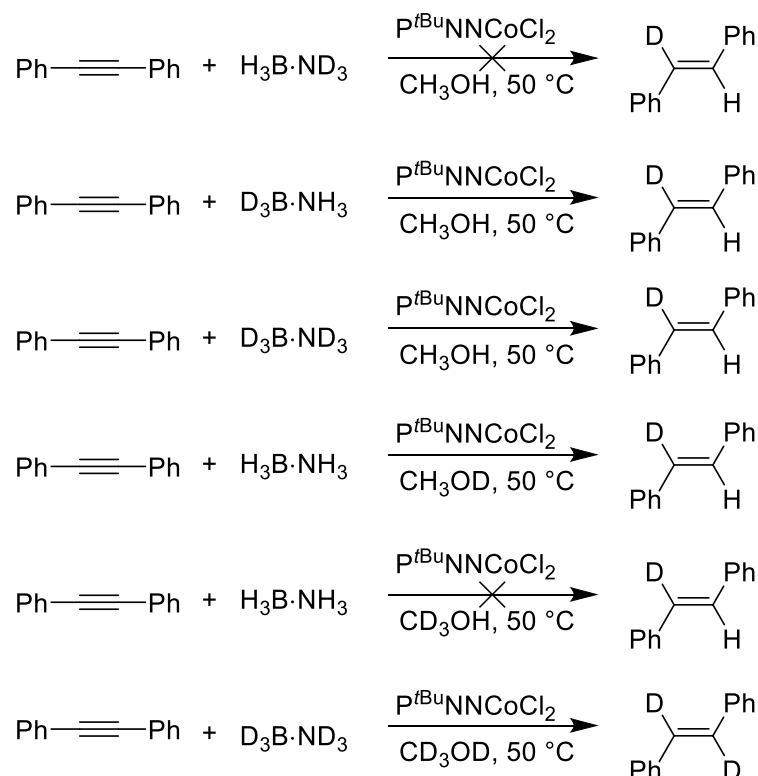

**Scheme S 1.** An overview of the deuterium labeling experiments.

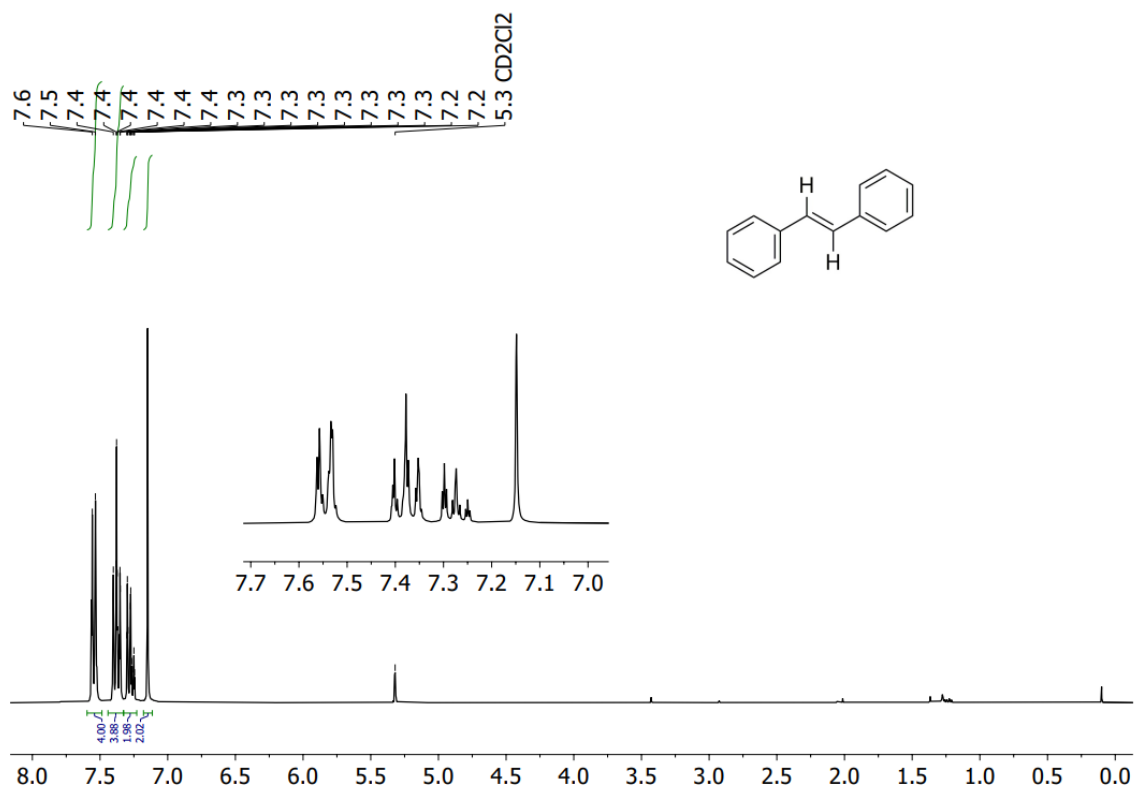

**Figure S 33.** <sup>1</sup>H NMR spectrum (CD<sub>2</sub>Cl<sub>2</sub> at 25 °C) of (*E*)-Stilbene after the TSH with H<sub>3</sub>B·ND<sub>3</sub>. In CH<sub>3</sub>OH.

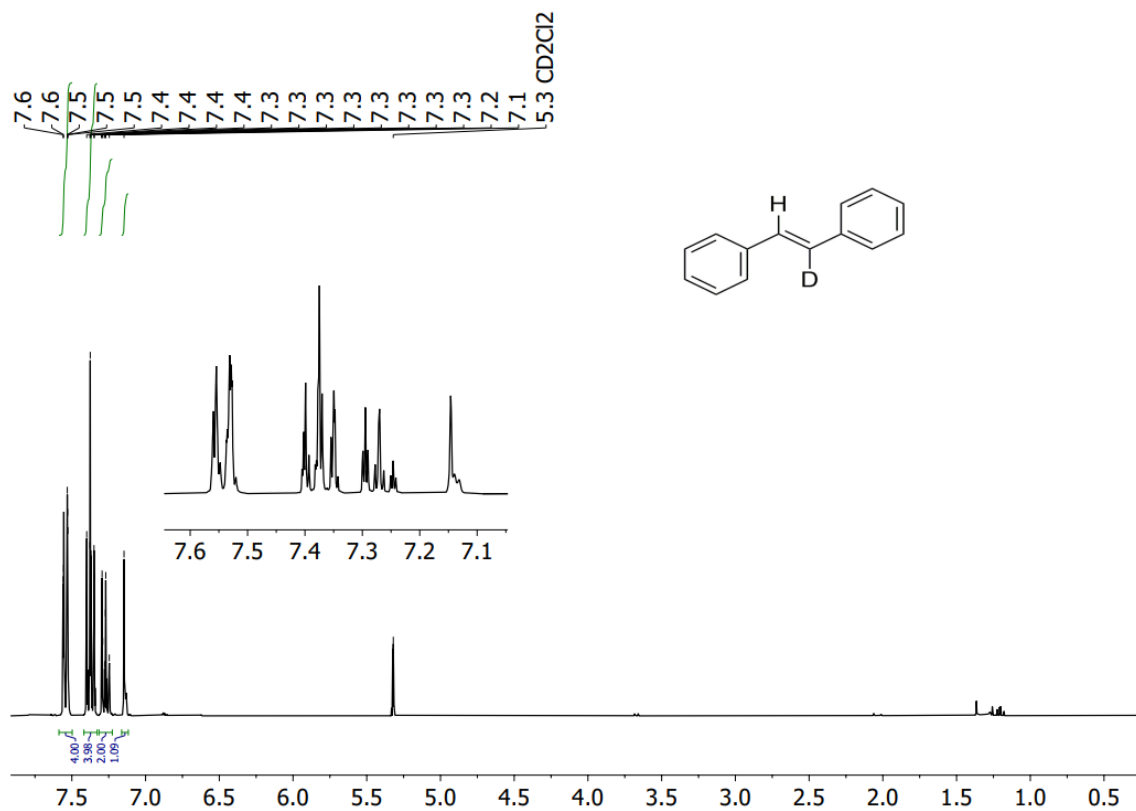

**Figure S 34.** <sup>1</sup>H NMR spectrum (CD<sub>2</sub>Cl<sub>2</sub> at 25 °C) of monodeuterated (*E*)-Stilbene after the TSH with D<sub>3</sub>B·NH<sub>3</sub> in CH<sub>3</sub>OH.

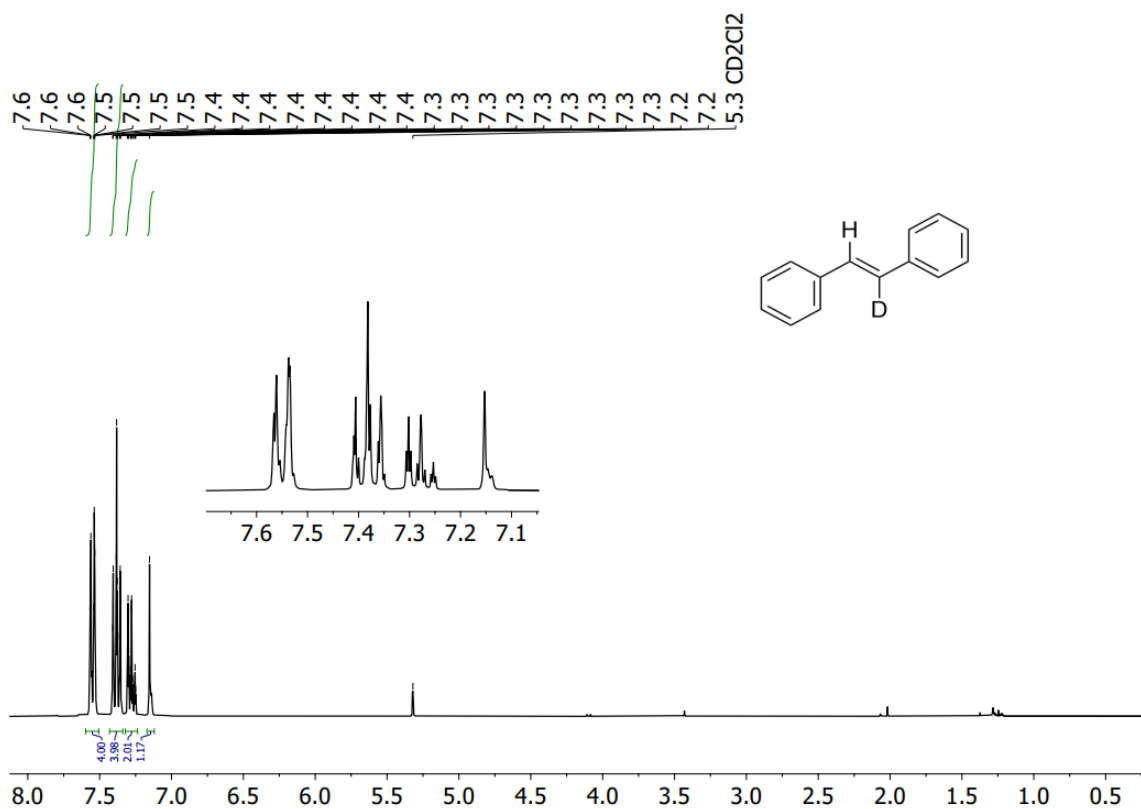

**Figure S 35.** <sup>1</sup>H NMR spectrum (CD<sub>2</sub>Cl<sub>2</sub> at 25 °C) of (*E*)-Stilbene after the TSH with D<sub>3</sub>B·ND<sub>3</sub> in CH<sub>3</sub>OH.

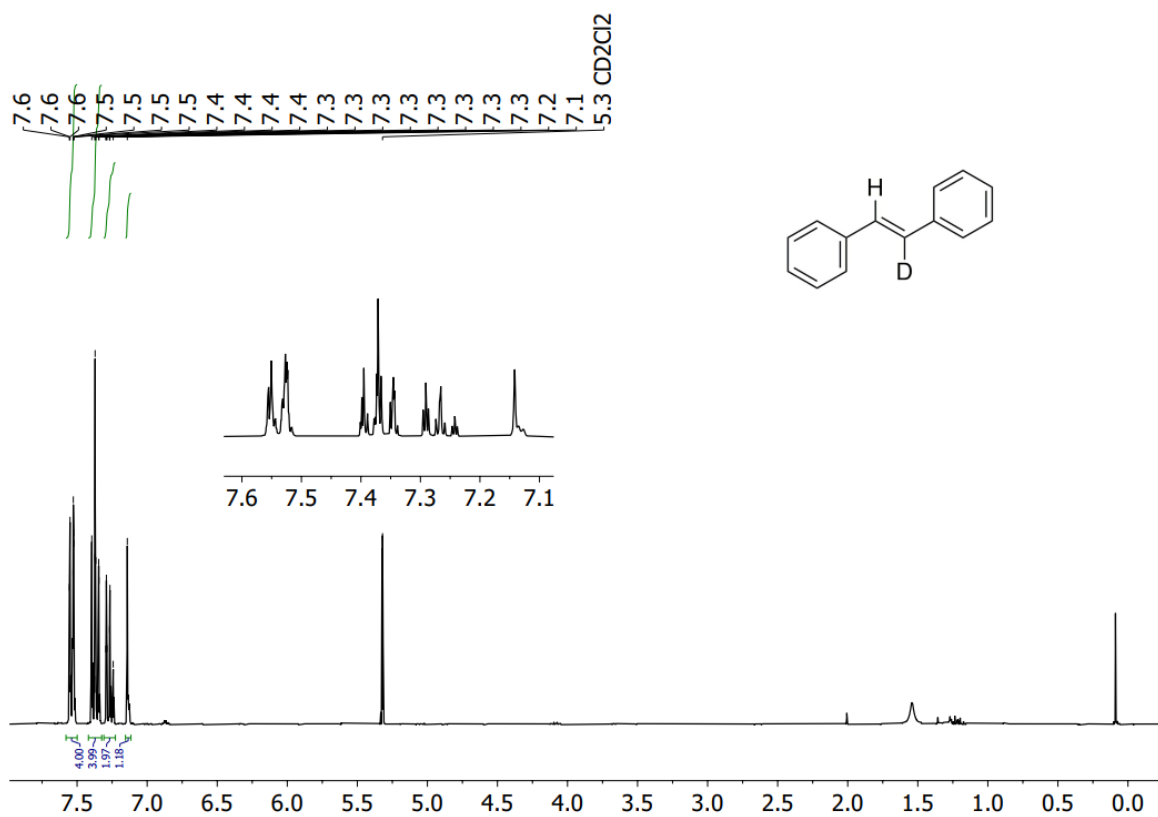

**Figure S 36.** <sup>1</sup>H NMR spectrum (CD<sub>2</sub>Cl<sub>2</sub> at 25 °C) of (*E*)-Stilbene after the TSH with H<sub>3</sub>B·NH<sub>3</sub> in CH<sub>3</sub>OD.



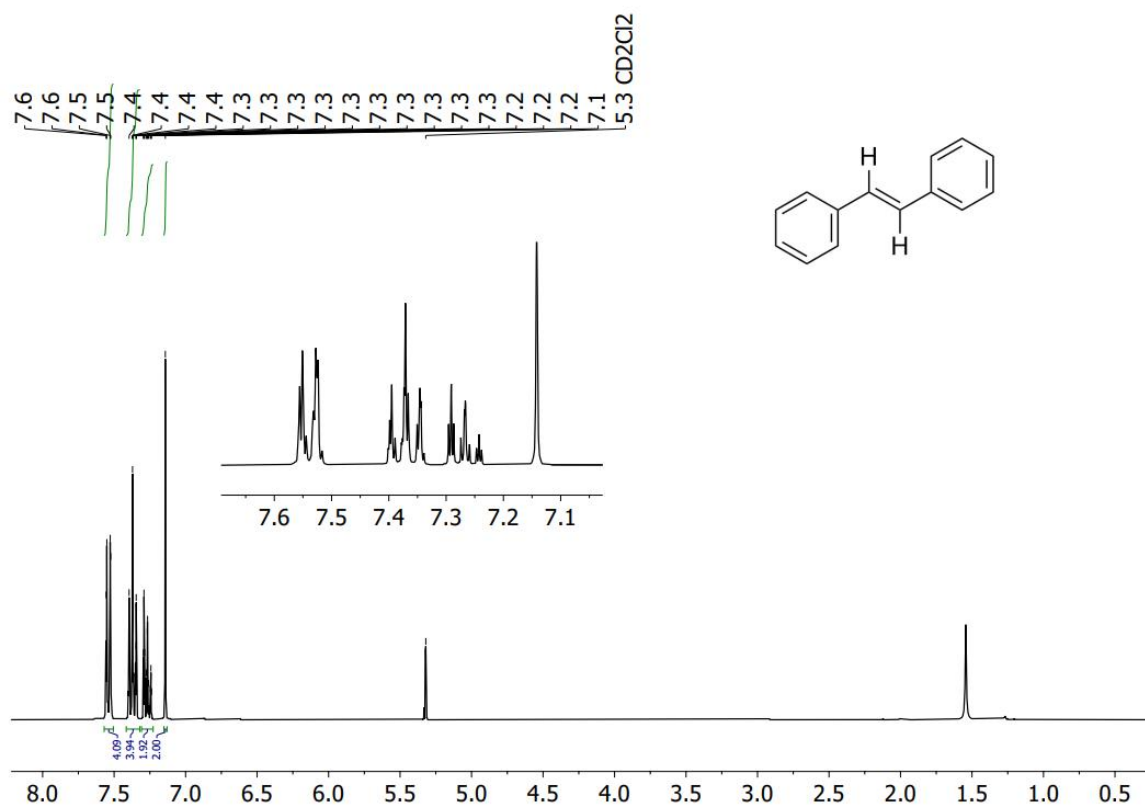

**Figure S 37.** <sup>1</sup>H NMR spectrum (CD<sub>2</sub>Cl<sub>2</sub> at 25 °C) of (*E*)-Stilbene after the TSH with H<sub>3</sub>B·NH<sub>3</sub> in CD<sub>3</sub>OH.

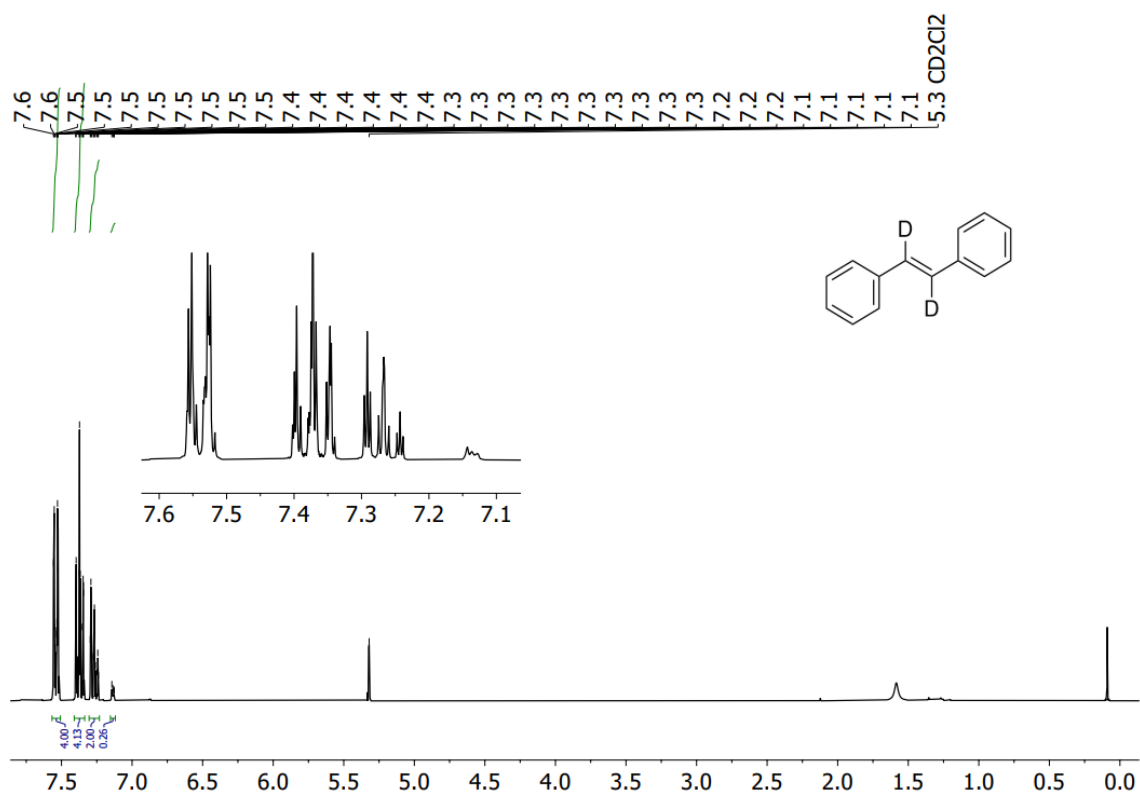

**Figure S 38.** <sup>1</sup>H NMR spectrum (CD<sub>2</sub>Cl<sub>2</sub> at 25 °C) of (*E*)-Stilbene after the TSH with D<sub>3</sub>B·ND<sub>3</sub> in CD<sub>3</sub>OD.

## Control experiments

### Mercury poisoning

According to GP 1, cobalt complex **1a** (2.45 mg, 1 mol%), ammonia borane (15.4 mg, 0.50 mmol) and one drop of mercury were made to react with diphenylacetylene (89.1 mg, 0.50 mmol) in methanol (2 mL). The corresponding GC analysis and  $^1\text{H}$  NMR spectra show full conversion to (*E*)-stilbene.

### $\text{PMe}_3$ poisoning

According to GP 1, cobalt catalyst **1a** (2.45 mg, 1 mol%), ammonia borane (15.4 mg, 0.50 mmol) were made to react with diphenylacetylene (89.1 mg, 0.50 mmol) in methanol (2 mL). After a reaction time of 3 min,  $\text{PMe}_3$  (0.1 eq or 100 eq) was added and stirred for 12 h. The corresponding GC-analysis and  $^1\text{H}$ -NMR-spectra shows full conversion to (*E*)-stilbene.

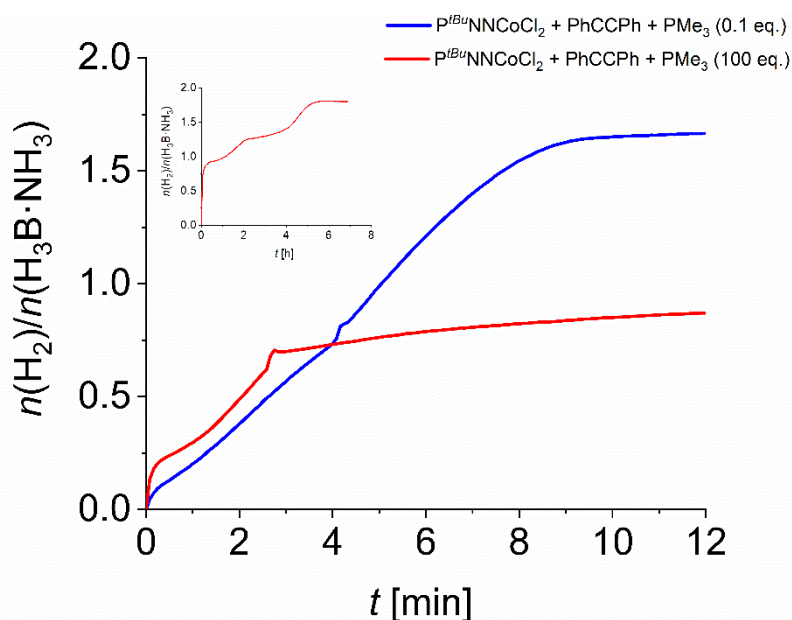

**Figure S 39.** Comparison of volumetric data from  $\text{PMe}_3$  poisoning experiments.

### Reaction under $\text{H}_2$ atmosphere

Under an atmosphere of argon, cobalt catalyst **1a** (2.45 mg, 1 mol%) was dissolved in MeOH or THF (2 ml). The reaction mixture was then degassed by using freeze-pump-thaw cycles (3x). Afterwards the Schlenk tube was purged with hydrogen gas and diphenylacetylene (89.1 mg, 0.50 mmol) was added. The reaction mixture was stirred at room temperature for 2 days under an atmosphere of hydrogen. Then  $\text{CH}_2\text{Cl}_2$  (5 mL) were added, and an aliquot part of this solution was analyzed by gas chromatography. The corresponding GC analysis and  $^1\text{H}$  NMR spectra shows no conversion to the (*E*)- or (*Z*)-product.

### Reaction in the presence of base under $H_2$ atmosphere

Under an atmosphere of argon, cobalt catalyst **1a** (2.45 mg, 1 mol%) and KOtBu (1–2 eq.) was dissolved in MeOH. The reaction mixture was then degassed by using freeze-pump-thaw cycles (3x). Afterwards the Schlenk tube was purged with hydrogen gas and diphenylacetylene (89.1 mg, 0.50 mmol) was added. The reaction mixture was stirred at room temperature for 2 day under an atmosphere of hydrogen. Then  $CH_2Cl_2$  (5 mL) were added, and an aliquot part of this solution was analyzed by gas chromatography. The corresponding GC analysis shows no conversion to the (*E*)- or (*Z*)-product.

### Reaction of **1a** with MeOH

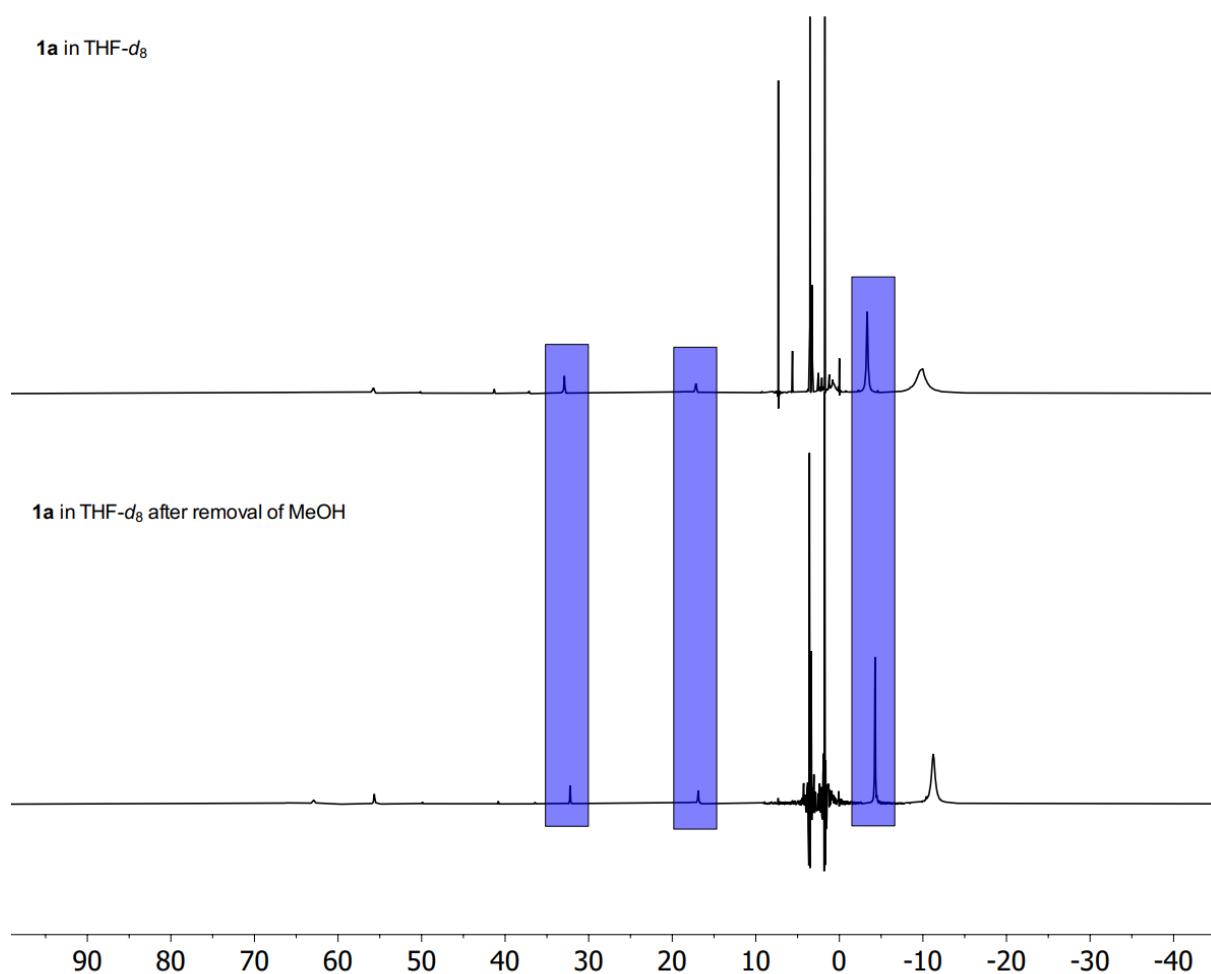

**Figure S 40.**  $^1H$  NMR spectrum ( $THF-d_8$  at 25 °C) of **1a** before the addition of MeOH (above) and **1a** after removal of MeOH (below).

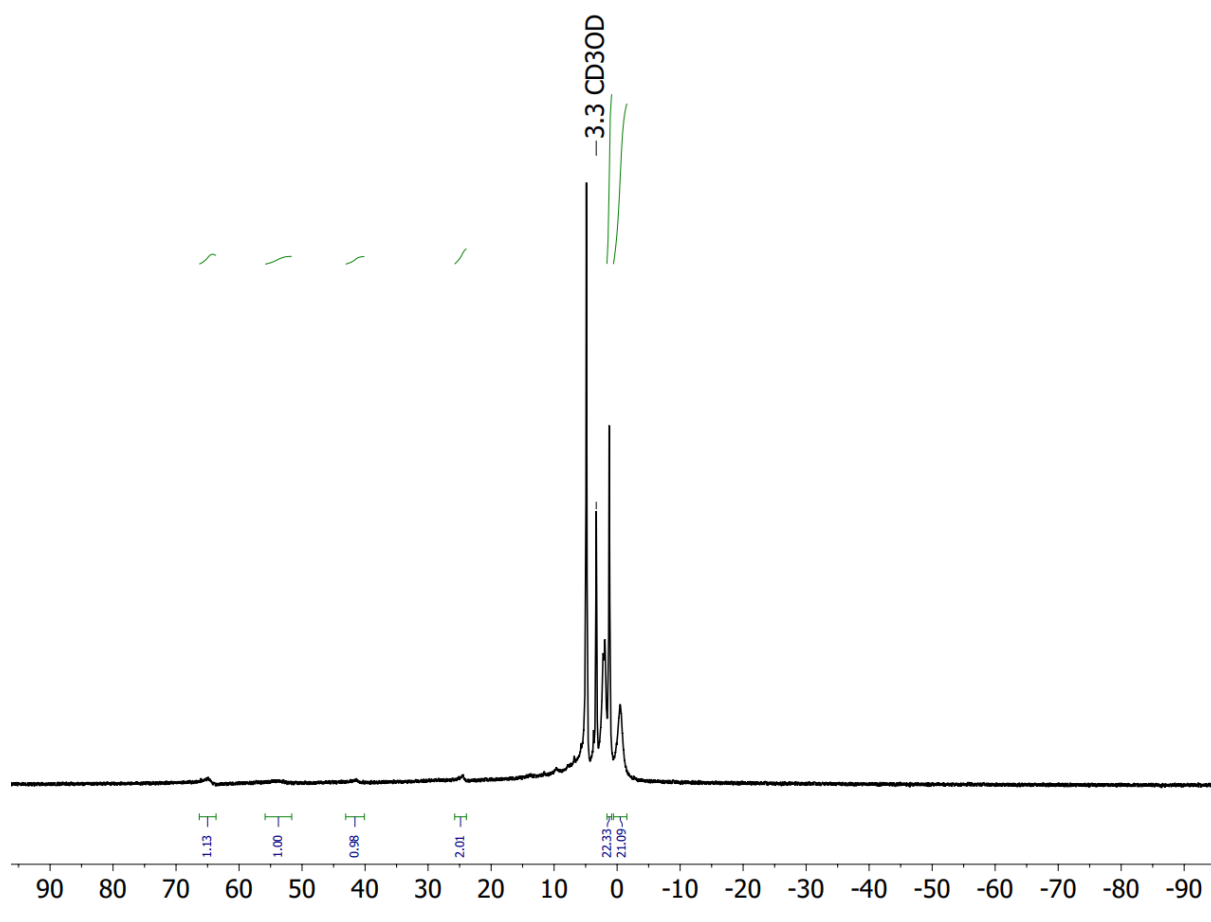

**Figure S 41.** In situ  $^1\text{H}$  NMR spectrum ( $\text{CD}_3\text{OD}$  at  $25\text{ }^\circ\text{C}$ ) of catalytic mixtures using complex **1a** as catalyst.

*TSH with 1a in the presence of Zn*

Under an atmosphere of Ar, cobalt catalyst (2.45 mg, 1 mol%) and Zn (1 eq.) were stirred together in MeOH (2 mL) at ambient temperature for 2 h. Then the reaction mixture was filtered in to an empty Schlenk flask containing diphenylacetylene (89.1 mg, 0.5 mmol) and ammonia borane (15.4 mg, 0.5 mmol). This mixture was stirred for another 2 h. Then  $\text{CH}_2\text{Cl}_2$  (5 mL) was added, an aliquot of this solution was analysed by gas chromatography (Table S4).

**Table S 4.** TSH of diphenylacetylene with **1a** in the presence of different additives.

| Entry | Cat.      | [Co]<br>mol% | Additive | T / $^\circ\text{C}$ | Conv. | E/Z   |
|-------|-----------|--------------|----------|----------------------|-------|-------|
| 1     | —         | —            | Zn       | r.t                  | 51    | 11/89 |
| 2     | <b>1a</b> | 1            | Zn       | r.t                  | 84    | 37/63 |
| 3     | <b>1a</b> | 1            | Zn       | 40                   | 100   | 100/0 |

Yields were determined by GC-Analysis.

### Reaction of **1a** with Zn

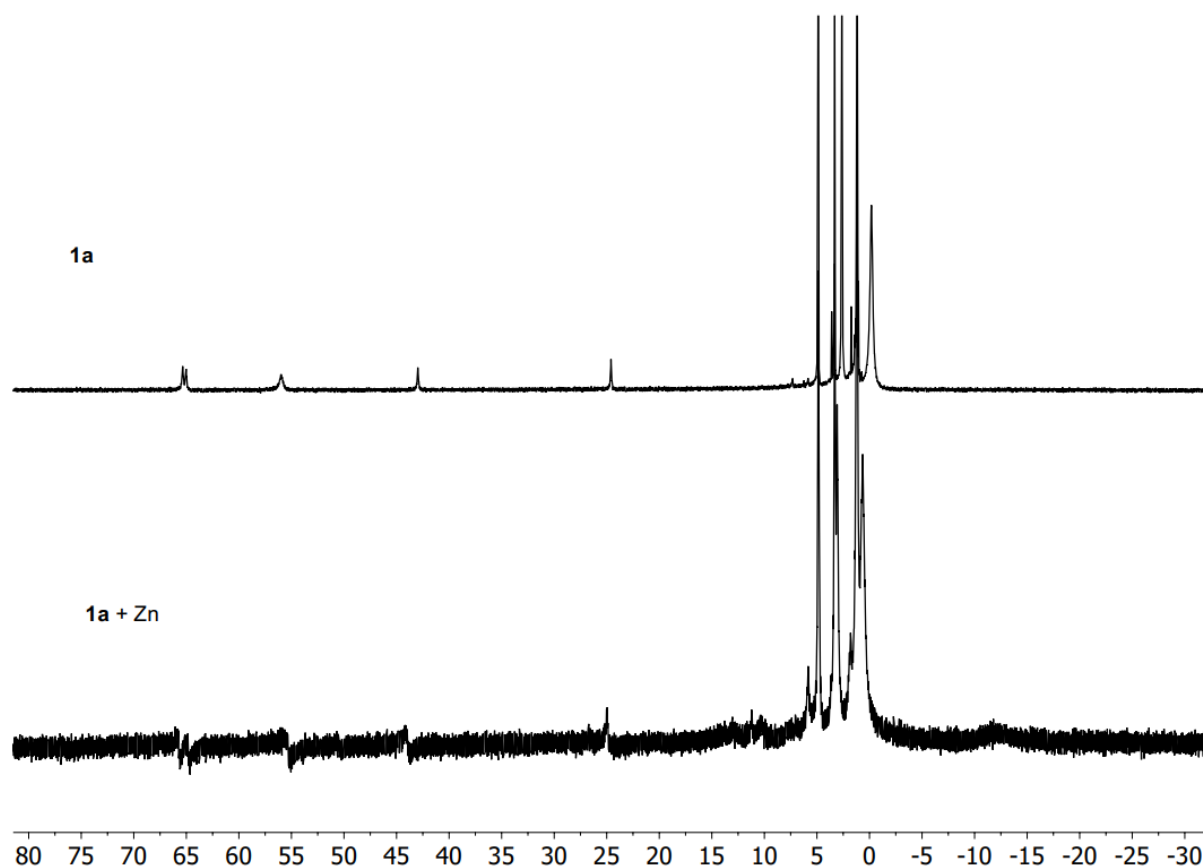

**Figure S 42.** In situ <sup>1</sup>H NMR spectrum (CD<sub>3</sub>OD at 25 °C) of complex **1a** (20.4 mmol) in presence of Zn (1 eq.).

### TSH with **1a-Me**

According to GP 3, cobalt complex **1a-Me** (2.52 mg, 1 mol%), ammonia borane (15.4 mg, 0.50 mmol) were reacted with diphenylacetylene (89.1 mg, 0.50 mmol) in methanol (2 mL). Results are shown in Table S 5.

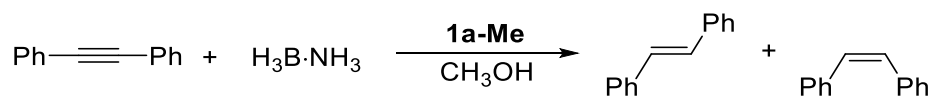

**Table S 5.** Summary of the TSH experiments with catalyst **1a-Me**.

| Entry | c / mol% | time / h | Conv. / % | E/Z (GC) |
|-------|----------|----------|-----------|----------|
| 1     | 1        | 0.5      | 58        | 56/54    |
| 2     | 1        | 1        | 70        | 61/39    |
| 3     | 1        | 15       | 99        | 81/19    |
| 4     | 1        | 17       | 94        | 67/33    |

Reaction conditions: Alkyne (0.50 mmol), H<sub>3</sub>B·NH<sub>3</sub> (0.50 mmol), V(MeOH) = 2.0 mL, Yields were determined by GC-Analysis.

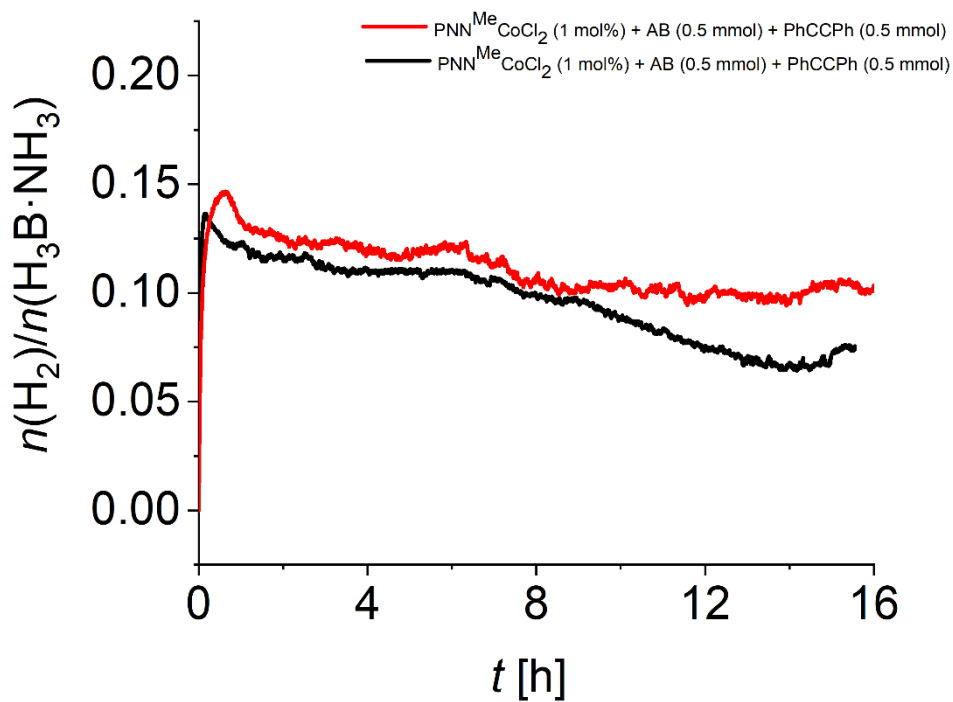

**Figure S 43.** Volumetric curves of the TSH with **1a-Me** and diphenylacetylene. Red: entry 4 (Table S 5). Black: entry 3 (Table S 5).

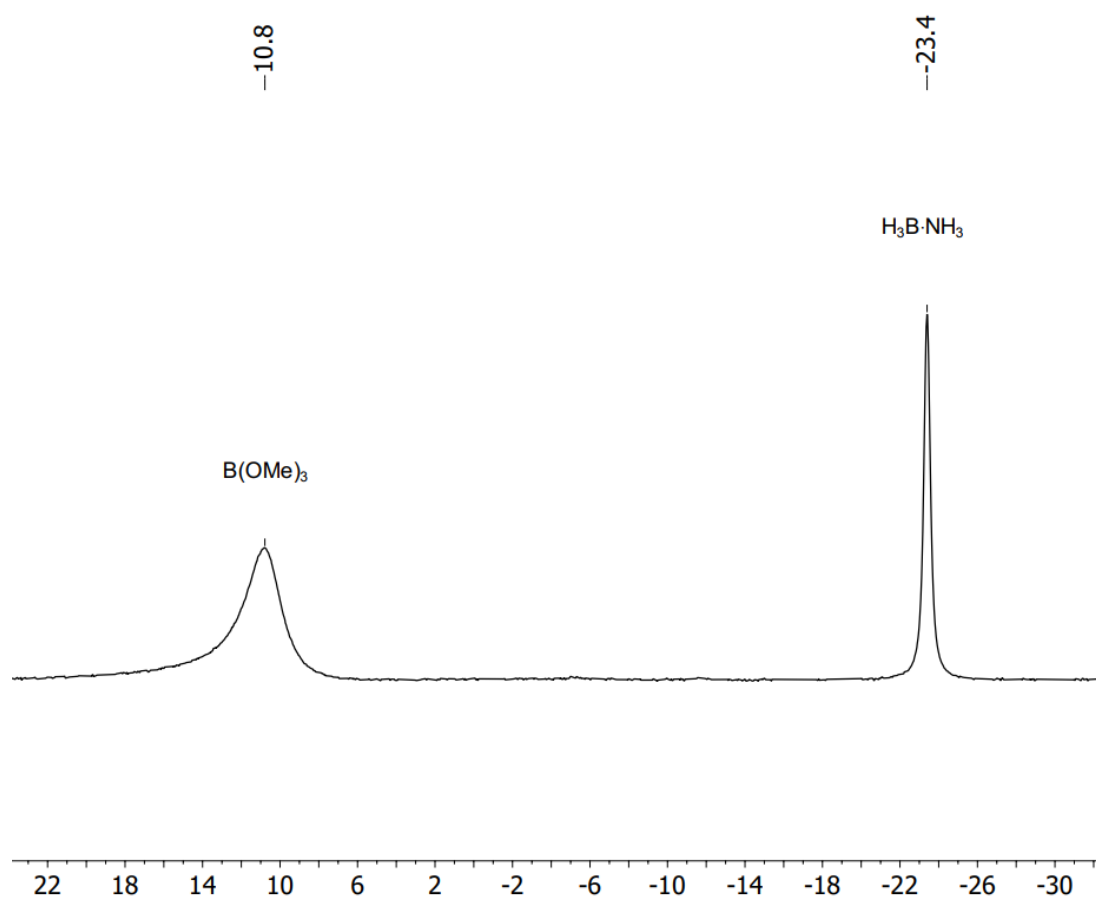

**Figure S 44.**  $^{11}\text{B}\{\text{H}\}$  NMR spectrum of the reaction mixture of entry 3 (Table S 5) ( $\text{CD}_3\text{OD}$ ,  $25^\circ\text{C}$ ).

## Isomerisation experiments

### General procedure (GP2)

Under an atmosphere of argon, cobalt complex **1a** (1 mol%) and ammonia borane (15.4 mg, 0.50 mmol) were added sequentially to a preheated schlenk tube equipped with a magnetic stir bar. (*Z*)-Stilbene (85.7  $\mu$ L, 89.1 mg, 0.50 mmol) was dissolved in MeOH (2 ml) and added to the Schlenk tube. The reaction mixture was then stirred for 1–3.5 h at given temperature. Subsequently the reaction mixture was exposed to air and  $\text{CH}_2\text{Cl}_2$  (5 mL) were added. An aliquot of this solution was analysed by gas chromatography with biphenyl as the internal standard.

**Table S 6.** Summary of isomerisation experiments in presence of catalyst and ammonia borane.

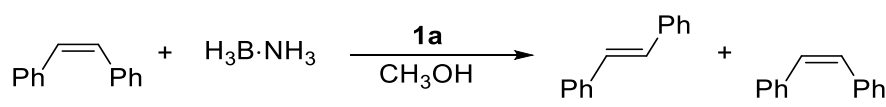

| entry | <i>c</i> / mol% | solvent        | <i>T</i> / °C | time / h | <i>E/Z</i> (GC) |
|-------|-----------------|----------------|---------------|----------|-----------------|
| 1     | 3               | MeOH           | 50            | 0.5      | 100/0           |
| 2     | 1               | MeOH           | r.t           | 0.5      | 97/3            |
| 3     | 1               | <i>i</i> -PrOH | r.t           | 0.5      | 97/3            |
| 4     | 1               | THF            | r.t           | 3        | 82/18           |

Reaction conditions: (*Z*)-Stilbene (0.50 mmol),  $\text{H}_3\text{B}\cdot\text{NH}_3$  (0.50 mmol),  $V(\text{solvent})= 2.0$  mL, *E/Z*-ratio was determined by GC analysis using biphenyl as the internal standard.

**Table S 7.** Summary of isomerisation experiments in absence of catalyst.

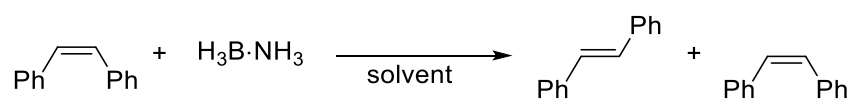

| entry | solvent        | <i>T</i> / °C | time / h | <i>E/Z</i> (GC) |
|-------|----------------|---------------|----------|-----------------|
| 1     | MeOH           | r.t           | 1        | 85/15           |
| 2     | MeOH           | r.t           | 2        | 82/18           |
| 3     | MeOH           | r.t           | 3.5      | 82/18           |
| 4     | MeOH           | 50            | 0.5      | 86/14           |
| 5     | <i>i</i> -PrOH | r.t           | 1        | 88/12           |
| 6     | <i>i</i> -PrOH | 50            | 1        | 88/12           |

Reaction conditions: (*Z*)-Stilbene (0.50 mmol),  $\text{H}_3\text{B}\cdot\text{NH}_3$  (0.50 mmol),  $V(\text{solvent})= 2.0$  mL, *E/Z*-ratio was determined by GC analysis using biphenyl as the internal standard.

**Table S 8.** Summary of isomerisation experiments in absence of catalyst and ammonia borane.

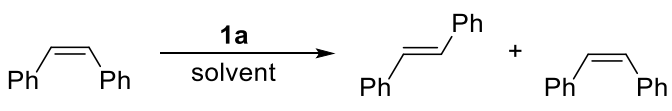

| entry | solvent        | $T / ^\circ\text{C}$ | time / h | $E/Z$ (GC) |
|-------|----------------|----------------------|----------|------------|
| 1     | MeOH           | r.t                  | 0.5      | 39/61      |
| 2     | <i>i</i> -PrOH | r.t                  | 0.5      | 29/71      |

Reaction conditions: (*Z*)-Stilbene (0.50 mmol),  $V(\text{solvent})= 2.0 \text{ mL}$ ,  $E/Z$ -ratio were determined by GC-Analysis using biphenyl as the internal standard.



## Volumetric studies

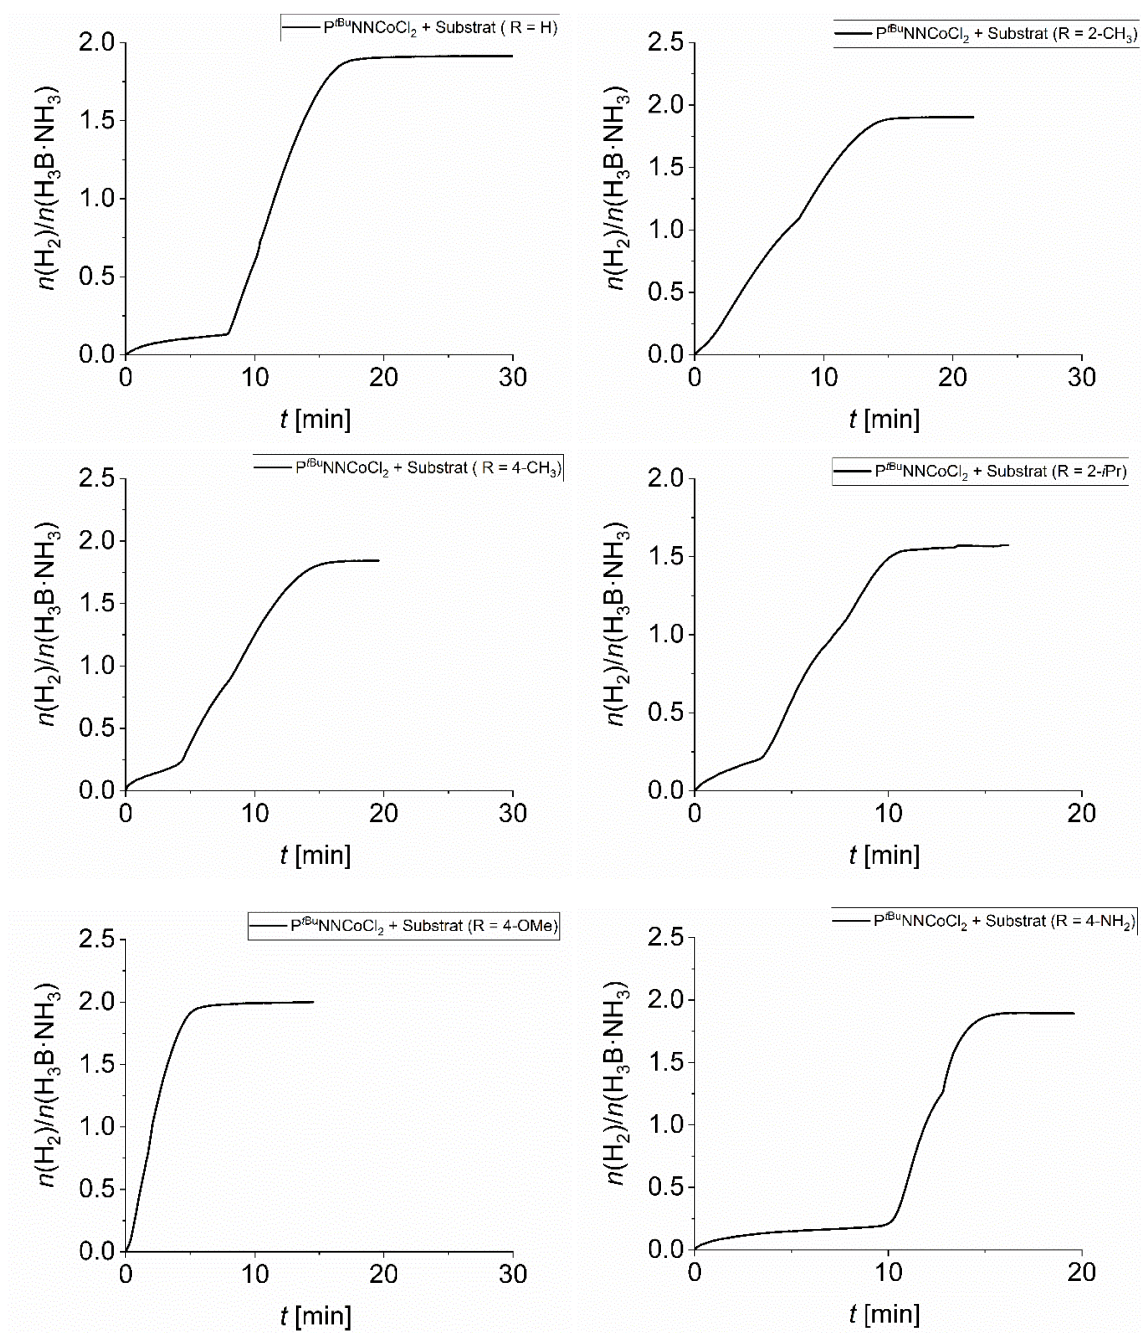

**Figure S 45.** Volumetric curves of the TSH with **1a** and different substituted alkynes (Part 1).

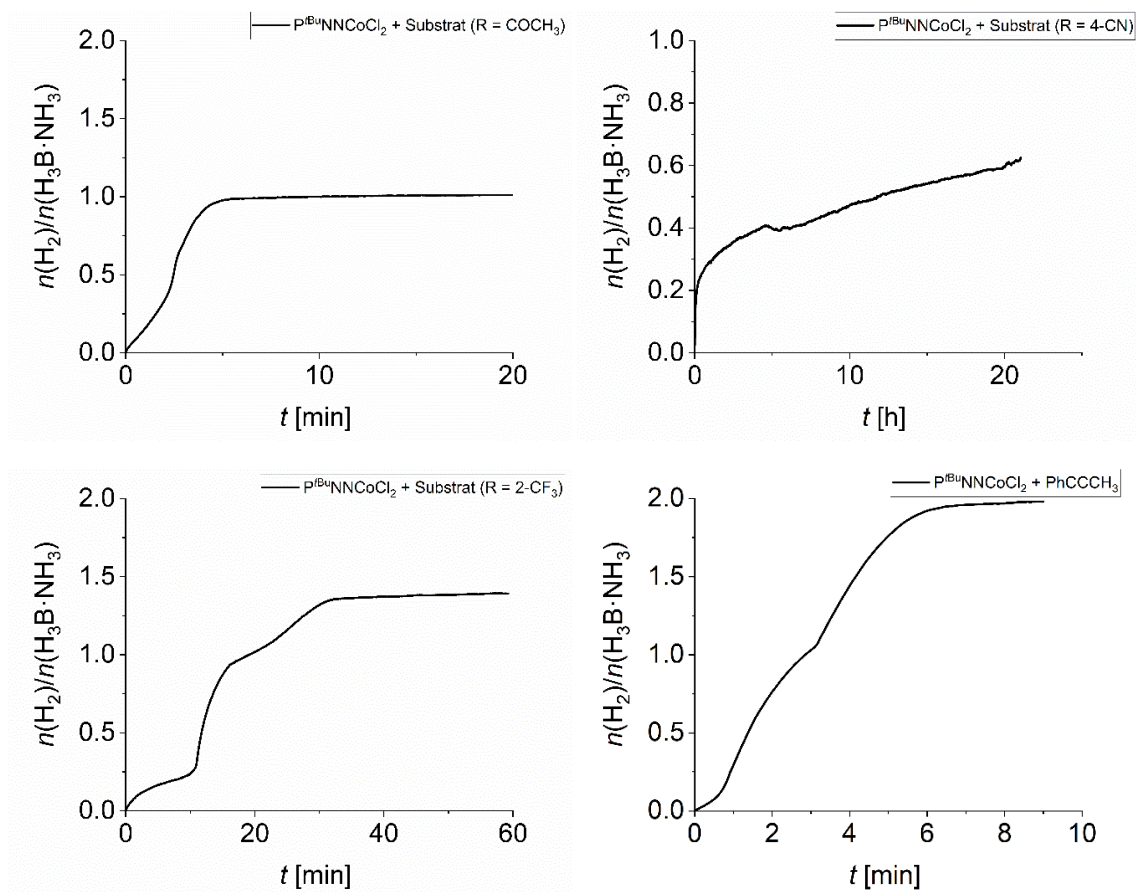

**Figure S 46.** Volumetric curves of the TSH with **1a** and different substituted alkynes (Part 2).

## DFT calculations

All calculations were carried out with Gaussian 16 program.<sup>11</sup> Geometry optimisation was performed in gas phase at the M06L level<sup>12</sup> with the TZVP basis set (M06L/TZVP).<sup>13</sup> The M06L functional has been validated in our recent work<sup>14</sup> in which benchmark calculations have been performed for thermodynamic parameters of the Co(I) and Co(III) PNP complexes by using different density functional methods in conjunction of solvation and van der Waals dispersion correction, and M06L has been found to show the best agreement with experiment. In addition, we also showed that M06L functional can reproduce the difference of the enthalpy of formation between *cis*- and *trans*-stilbene as well as the hydrogenation enthalpy from *trans*-stilbene to 1,2-diphenyl ethane within 1 kcal·mol<sup>-1</sup> in gas phase.<sup>15</sup> All these show the best performance in calculating the kinetics and thermodynamics. All optimised structures were further characterised either as energy minimums without imaginary frequencies or transition states with only one imaginary frequency by frequency analysis. On the basis of M06L/TZVP geometries in the gas phase, single-point energies were calculated by including the solvation effect of methanol as solvent based on solute electron density (SMD<sup>16</sup>) at the M06L-SCRF (M06L-SCRF/TZVP//M06L/TZVP). The Gibbs free energies were further corrected to standard state in solution with a standard concentration of 1 mol·L<sup>-1</sup> ( $p = 24.5$  atm) from the standard state in gas phase ( $p = 1$  atm). In our calculations, we used catalyst (**1a**), substrates and intermediates in real-size; this can rule out the effect of oversimplification. The computed energetic data and optimised Cartesian coordinates are listed in Supporting Information.

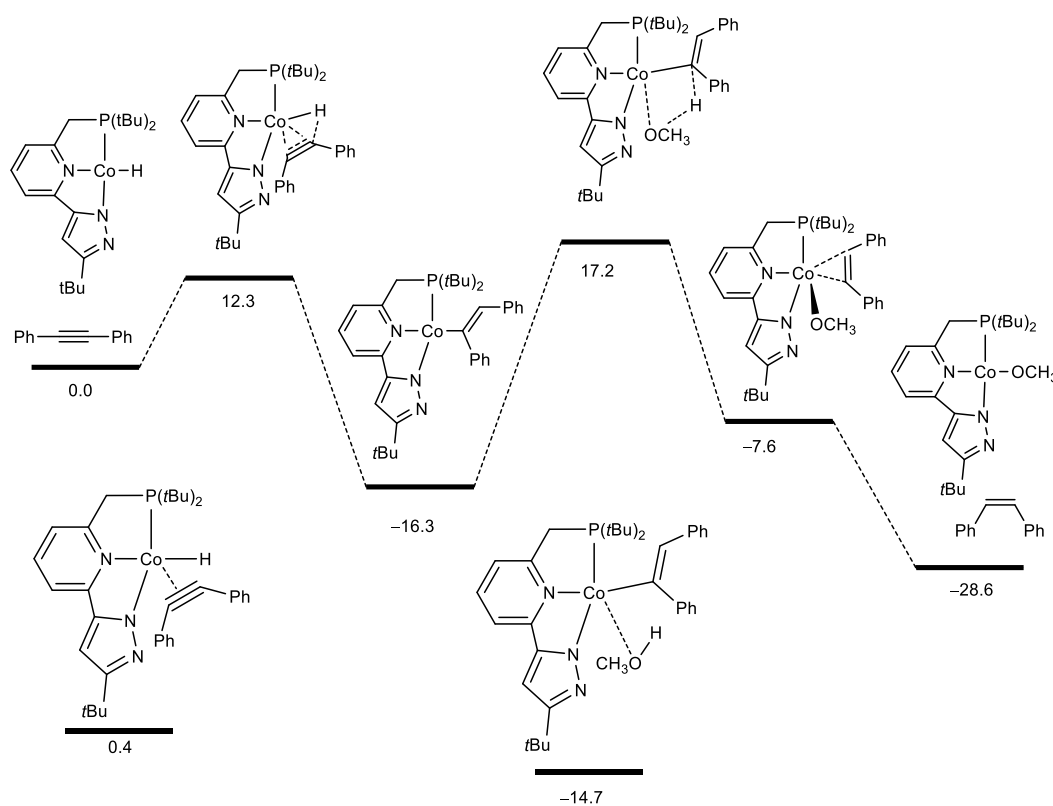

**Figure S 47.** Full Gibbs free energy profile for the hydrogenation of 1,2-diphenylacetylene to Z-stilbene (kcal·mol<sup>-1</sup>).

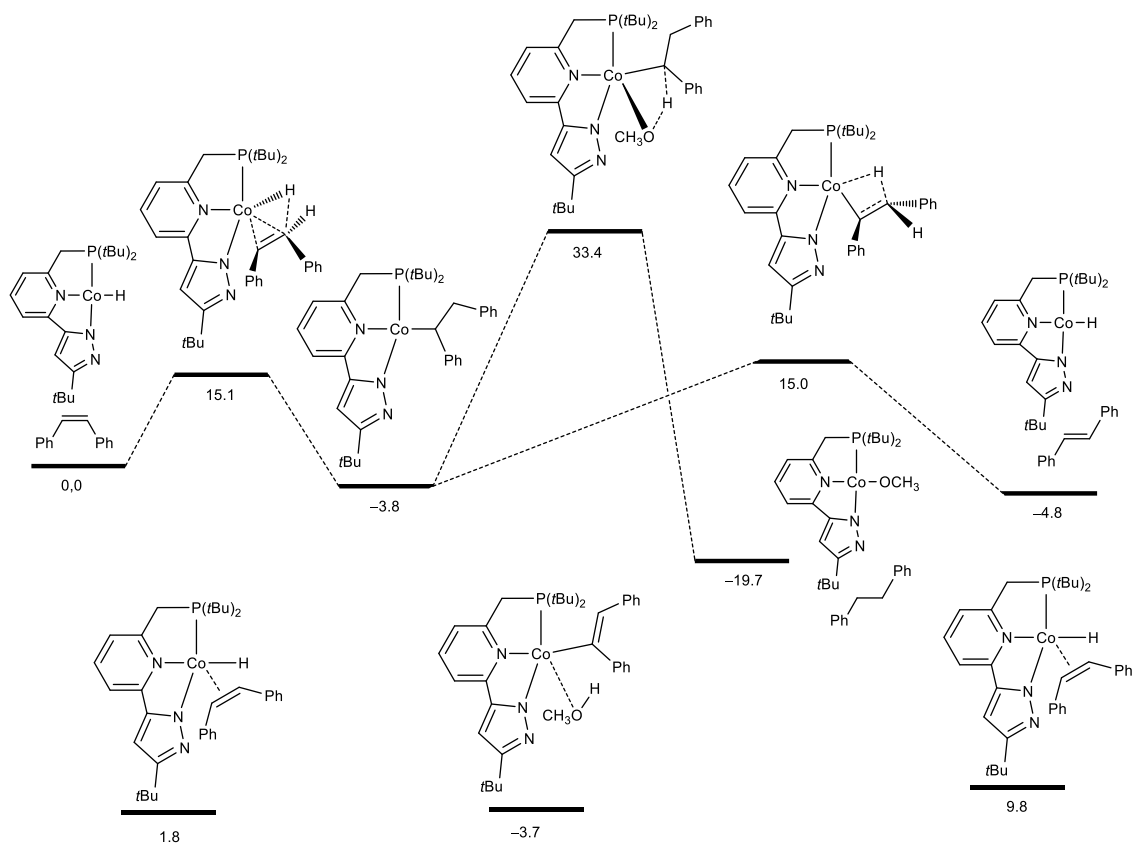

**Figure S 48.** Full Gibbs free energy profile for isomerization of *Z*-stilbene to *E*-stilbene as well as hydrogenation to 1,2-diphenyl ethane (kcal·mol<sup>-1</sup>).

**Table S 9.** M06L/TZVP computed energetic data from structure optimisation in gas phase (M06L/TZVP//FOpt) as well as in methanol solution from single-point calculation on using the gas phase optimised structures (M06L-SCRF/TZVP//M06L/TZVP/SP).

|                                                                                                                     | M06L/TZVP//FOpt                                                                          | M06L-<br>SCRF/TZVP//M06L/TZVP/SP                                                         |
|---------------------------------------------------------------------------------------------------------------------|------------------------------------------------------------------------------------------|------------------------------------------------------------------------------------------|
| 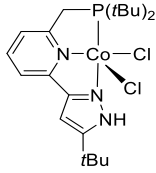 <p><b>1a-Doublet</b></p>          | HF=-3629.8430585<br>ZPE=0.522884<br>NImag=0<br>Htot=-3629.286642<br>Gtot= -3629.382901   | HF=-3629.8873938<br>ZPE= 0.521854<br>NImag=0<br>Htot= -3629.331794<br>Gtot= -3629.430217 |
|  <p><b>1a-Quartet</b></p>          | HF=-3629.8419592<br>ZPE=0.521440<br>NImag=0<br>Htot=-3629.286079<br>Gtot= -3629.386989   | HF=-3629.8850597<br>ZPE= 0.520415<br>NImag=0<br>Htot= -3629.330060<br>Gtot= -3629.432122 |
|  <p><b>PNNCo-Cl-Doublet</b></p>    | HF=-3168.9833244<br>ZPE=0.508132<br>NImag=0<br>Htot=-3168.443703<br>Gtot=-3168.535088    | HF=-3169.0275229<br>ZPE= 0.507125<br>NImag=0<br>Htot= -3168.489632<br>Gtot= -3168.578649 |
| H-Cl                                                                                                                | HF=-460.8061245<br>ZPE=0.006842<br>NImag=0<br>Htot=-460.795978<br>Gtot= -460.817166      | HF=-460.8120891<br>ZPE=0.006839<br>NImag=0<br>Htot=-460.801945<br>Gtot= -460.823133      |
|  <p><b>PNNCo-Cl-Quartet</b></p>  | HF=-3168.9771163<br>ZPE= 0.508016<br>NImag=0<br>Htot= -3168.437346<br>Gtot= -3168.530838 | HF=-3169.0166433<br>ZPE= 0.506739<br>NImag=0<br>Htot= -3168.478663<br>Gtot= -3168.572275 |
|  <p><b>PNNCo(H)2-Doublet</b></p> | HF=-2710.4648002<br>ZPE=0.532207<br>NImag=0<br>Htot=-2709.901795<br>Gtot= -2709.991237   | HF=-2710.4985094<br>ZPE= 0.530898<br>NImag=0<br>Htot= -2709.937453<br>Gtot= -2710.024837 |
|  <p><b>PNNCo(H)2-Quartet</b></p> | HF=-2710.4334515<br>ZPE=0.529069<br>NImag=0<br>Htot=-2709.872327<br>Gtot= -2709.966361   | HF=-2710.4801352<br>ZPE= 0.527467<br>NImag=0<br>Htot= -2709.921880<br>Gtot= -2710.011615 |
| CH3O-Anion                                                                                                          | HF=-115.1187534<br>ZPE=0.034728<br>NImag=0<br>Htot=-115.080181<br>Gtot= -115.106242      | HF=-115.2401942<br>ZPE=0.035663<br>NImag=0<br>Htot=-115.200698<br>Gtot= -115.226746      |
| LCoH-OCH3-Anion-Doublet                                                                                             | HF=-2824.5032846<br>ZPE=0.551899<br>NImag=0<br>Htot=-2823.917806<br>Gtot= -2824.013537   | HF=-2824.5954532<br>ZPE=0.551723<br>NImag=0<br>Htot=-2824.012768<br>Gtot= -2824.100798   |

|                                                                                                                 |                                                                                                      |                                                                                                       |
|-----------------------------------------------------------------------------------------------------------------|------------------------------------------------------------------------------------------------------|-------------------------------------------------------------------------------------------------------|
| LCoH-OCH3-Anion-Q                                                                                               | HF=-2824.4901848<br>ZPE=0.549642<br>NImag=0<br>Htot=-2823.905728<br>Gtot= -2824.005796               | HF=-2824.5887774<br>ZPE=0.548478<br>NImag=0<br>Htot=-2824.008395<br>Gtot= -2824.100142                |
| LDHCo-H-Anion                                                                                                   | HF=-2709.3243999<br>ZPE=0.509689<br>NImag=0<br>Htot=-2708.784475<br>Gtot= -2708.871971               | HF=-2709.4168042<br>ZPE=0.509711<br>NImag=0<br>Htot=-2708.878656<br>Gtot= -2708.960275                |
| LDHCo-H-Anion-Triplet                                                                                           | HF=-2709.3257488<br>ZPE=0.508704<br>NImag=0<br>Htot=-2708.786474<br>Gtot= -2708.875866               | HF=-2709.416925<br>ZPE=0.507956<br>NImag=0<br>Htot=-2708.879816<br>Gtot= -2708.965103                 |
| LDHCo-Alkynyl-OH-CH3-TS-Anion                                                                                   | HF=-3364.6811203<br>ZPE=0.755223<br>NImag= 1 (-1474.2062)<br>Htot=-3363.880551<br>Gtot= -3364.000229 | HF=-3364.7683753<br>ZPE= 0.754681<br>NImag=1 (-1588.5016)<br>Htot= -3363.969834<br>Gtot= -3364.086419 |
| 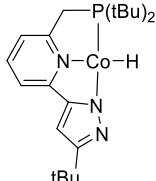<br><b>PNNCoH-Doublet</b>      | HF=-2709.3010077<br>ZPE=0.513669<br>NImag=0<br>Htot=-2708.757168<br>Gtot= -2708.846412               | HF=-2709.3403456<br>ZPE= 0.513166<br>NImag=0<br>Htot= -2708.797987<br>Gtot= -2708.883762              |
| <br><b>PNNCoH-Quartet</b>     | HF=-2709.279053<br>ZPE=0.511944<br>NImag=<br>Htot=-2708.736472<br>Gtot= -2708.826430                 | HF=-2709.317435<br>ZPE= 0.508907<br>NImag=0<br>Htot= -2708.779311<br>Gtot= -2708.865446               |
| <br><b>PNNCoOMe-Doublet</b>  | HF=-2823.888669<br>ZPE=0.547735<br>NImag=0<br>Htot=-2823.307654<br>Gtot= -2823.402919                | HF=-2823.9254248<br>ZPE= 0.546621<br>NImag=0<br>Htot= -2823.348042<br>Gtot= -2823.435414              |
| <br><b>PNNCoOMe-Quartet</b>  | HF=-2823.8820464<br>ZPE= 0.547311<br>NImag=0<br>Htot= -2823.301018<br>Gtot= -2823.398486             | HF=-2823.9201719<br>ZPE= 0.545739<br>2823.3744329<br>Htot= -2823.342056<br>Gtot= -2823.436132         |
| <br><b>PNNCo(c-H-BH2-Cl)</b> | HF=-3195.6347416<br>ZPE=0.540163<br>NImag=0<br>Htot=-3195.061006<br>Gtot= -3195.156997               | HF=-3195.6728485<br>ZPE= 0.538619<br>NImag=0<br>Htot= -3195.102086<br>Gtot= -3195.193023              |
| <br><b>PNNCo(c-H-BHCl-H)</b> | HF=-3195.6403349<br>ZPE=0.541240<br>NImag=0<br>Htot=-3195.066132<br>Gtot= -3195.160388               | HF=-3195.6817313<br>ZPE=0.539863<br>NImag=0<br>Htot= -3195.108518<br>Gtot= -3195.206131               |

|                                                                                                                                                      |                                                                                               |                                                                                                  |
|------------------------------------------------------------------------------------------------------------------------------------------------------|-----------------------------------------------------------------------------------------------|--------------------------------------------------------------------------------------------------|
| 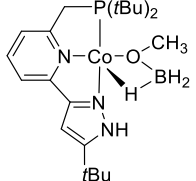 <p><b>PNNCo(c-H-BH<sub>2</sub>-OCH<sub>3</sub>)</b></p>            | HF=-2850.5747798<br>ZPE=0.582570<br>NImag=0<br>Htot=-2849.957794<br>Gtot= -2850.054458        | HF=-2850.6089236<br>ZPE= 0.581399<br>NImag=0<br>Htot= -2849.993899<br>Gtot= -2850.088315         |
|  <p><b>PNNCo(c-H-BH(OCH<sub>3</sub>)-H)</b></p>                     | HF=-2850.5760301<br>ZPE=0.581776<br>NImag=0<br>Htot=-2849.959782<br>Gtot= -2850.056757        | HF=-2850.6131826<br>ZPE= 0.580416<br>NImag=0<br>Htot= -2849.998811<br>Gtot= -2850.095441         |
| <p>Ph—C≡C—Ph<br/> <b>1,2-diphenyl acetylene</b></p>                                                                                                  | HF=-539.5498256<br>ZPE=0.191224<br>NImag=0<br>Htot=-539.346508<br>Gtot= -539.397315           | HF=-539.560954<br>ZPE=0.191031<br>NImag=0<br>Htot= -539.358694<br>Gtot= -539.405853              |
|  <p><b>PNNCo-H + Ph-C<sub>2</sub>-Ph-trigonal bipyramidal</b></p>   | HF=-3248.8638408<br>ZPE=0.706606<br>NImag=<br>Htot= -3248.114798<br>Gtot= -3248.230495        | HF=-3248.8964235<br>ZPE= 0.704726<br>NImag=0<br>Htot= -3248.149790<br>Gtot= -3248.264722         |
|  <p><b>PNNCo-H + Ph-C<sub>2</sub>-Ph-tetragonal pyramidal</b></p> | HF=-3248.8794302<br>ZPE=0.706381<br>NImag=0<br>Htot=-3248.130241<br>Gtot= -3248.248521        | HF=-3248.9187557<br>ZPE= 0.704913<br>NImag=0<br>Htot= -3248.171698<br>Gtot= -3248.289055         |
|  <p><b>TS1</b></p>                                                | HF=-3248.8644769<br>ZPE=0.705345<br>NImag=1 (-625)<br>Htot=-3248.116906<br>Gtot= -3248.234508 | HF=-3248.8987255<br>ZPE= 0.704045<br>NImag= 1 (-631)<br>Htot= -3248.153121<br>Gtot= -3248.270071 |
|  <p><b>PNNCo-cis-PhC=CHPh</b></p>                                 | HF=-3248.9121126<br>ZPE=0.711217<br>NImag=0<br>Htot=-3248.159954<br>Gtot= -3248.272381        | HF=-3248.9565341<br>ZPE= 0.710959<br>NImag= 0<br>Htot= -3248.205618<br>Gtot= -3248.315513        |
|  <p><b>PNNCo-cis-PhC=CHPh + CH<sub>3</sub>OH</b></p>              | HF=-3364.6855895<br>ZPE=0.764568<br>NImag=0<br>Htot=-3363.874800<br>Gtot= -3363.999967        | HF=-3364.72324<br>ZPE= 0.762730<br>NImag=0<br>Htot= -3363.915716<br>Gtot= -3364.036618           |

|                                                                                                                                                  |                                                                                                   |                                                                                                                    |
|--------------------------------------------------------------------------------------------------------------------------------------------------|---------------------------------------------------------------------------------------------------|--------------------------------------------------------------------------------------------------------------------|
| 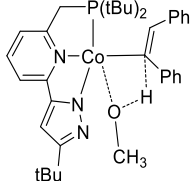 <p><b>TS2</b></p>                                              | HF=-3364.6371651<br>ZPE=0.759487<br>NImag=1 (-1184)<br>Htot=-3363.832465<br>Gtot=-3363.953350     | HF=-3364.669678<br>ZPE= 0.757530<br>NImag= 1 (-1303)<br>Htot= -3363.868208<br>Gtot= -3363.985918                   |
|  <p><b>PNNCo-OCH<sub>3</sub>+cis-Ph-CH=CH-Ph</b></p>            | HF=-3364.680749<br>ZPE=0.765329<br>NImag=0<br>Htot=-3363.870528<br>Gtot=-3363.989428              | HF=-3364.7140675<br>ZPE= 0.763155<br>NImag=0<br>Htot= -3363.906292<br>Gtot= -3364.025345                           |
|  <p><b>Cis-stilbene</b></p>                                     | HF=-540.7887551<br>ZPE=0.214905<br>NImag=0<br>Htot=-540.561852<br>Gtot= -540.611574               | HF=-540.7995666<br>ZPE= 0.214570<br>NImag=0<br>Htot= -540.572891<br>Gtot= -540.623376                              |
|  <p><b>PNNCo-H + cis-Ph-CH=CH-Ph-trigonal bipyramidal</b></p>   | HF=-3250.0958269<br>ZPE=0.730552<br>NImag=0<br>Htot=-3249.323398<br>Gtot= -3249.435939            | HF=-3250.1326288<br>ZPE= 0.729429<br>NImag=0<br>Htot= -3249.361116<br>Gtot= -3249.474823                           |
|  <p><b>PNNCo-H + cis-Ph-CH=CH-Ph-tetragonal pyramidal</b></p> | HF=-3250.1179943<br>ZPE=0.730134<br>NImag=0<br>Htot=-3249.345276<br>Gtot= -3249.461359            | HF=-3250.1595523<br>ZPE= 0.728942<br>NImag=0<br>Htot= -3249.387898<br>Gtot= -3249.504228                           |
|  <p><b>TS3</b></p>                                            | HF=-3250.105819<br>ZPE=0.730246<br>NImag=1 (-662.6301)<br>Htot=-3249.334046<br>Gtot= -3249.445701 | HF=-3250.140871<br>ZPE= 0.728878<br>NImag=1 (-680)<br>Htot= -3249.370244<br>Gtot= -3249.483038                     |
|  <p><b>PNNCo-cis-Ph-C-CHPh-H-agostic</b></p>                  | HF=-3250.1067169<br>ZPE=0.732740<br>NImag=0<br>Htot=-3249.331980<br>Gtot= -3249.446307            | HF=-3250.1445252<br>ZPE= 0.731033<br>NImag=0<br>Htot= -3249.371109<br>Gtot= -3249.487533                           |
|  <p><b>PNNCo-cis-Ph-C-CH<sub>2</sub>-Ph</b></p>               | HF=-3250.1348544<br>ZPE=0.734860<br>NImag=0<br>Htot=-3249.357866<br>Gtot= -3249.473662            | HF=-3250.174805<br>ZPE= 0.732993<br>NImag=0<br>Htot= -3249.401020<br>Gtot= -3249.513192<br><br>DG = -3.80 kcal/mol |



|                                                                                                                                                    |                                                                                               |                                                                                                 |
|----------------------------------------------------------------------------------------------------------------------------------------------------|-----------------------------------------------------------------------------------------------|-------------------------------------------------------------------------------------------------|
| 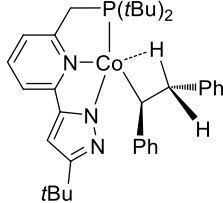 <p><b>PNNCo-trans-Ph-C-CHPh-H-agostic</b></p>                    | HF=-3250.1108374<br>ZPE=0.732920<br>NImag=0<br>Htot=-3249.335884<br>Gtot= -3249.450468        | HF=-3250.1501195<br>ZPE= 0.731760<br>NImag=0<br>Htot= -3249.376193<br>Gtot= -3249.491868        |
|  <p><b>TS4</b></p>                                                | HF=-3250.1026582<br>ZPE=0.729522<br>NImag=1 (-605)<br>Htot=-3249.331290<br>Gtot= -3249.445503 | HF=-3250.1402291<br>ZPE= 0.727846<br>NImag=1 (-625)<br>Htot= -3249.371059<br>Gtot= -3249.483268 |
|  <p><b>PNNCo-H + trans-Ph-CH=CH-Ph-tetragonal pyramidal</b></p>   | HF=-3250.1099403<br>ZPE=0.729635<br>NImag=0<br>Htot=-3249.337792<br>Gtot= -3249.453406        | HF=-3250.1489636<br>ZPE= 0.728527<br>NImag=0<br>Htot= -3249.378665<br>Gtot= -3249.491554        |
|  <p><b>Trans-stilbene</b></p>                                    | HF=-540.7960711<br>ZPE=0.214584<br>NImag=0<br>Htot=-540.569251<br>Gtot= -540.619959           | HF=-540.8080128<br>ZPE= 0.214003<br>NImag=0<br>Htot= -540.582458<br>Gtot= -540.631048           |
|  <p><b>PNNCo-H + trans-Ph-CH=CH-Ph-trigonal bipyramidal</b></p> | HF=-3250.1066459<br>ZPE=0.731030<br>NImag=0<br>Htot=-3249.333797<br>Gtot= -3249.445353        | HF=-3250.1414281<br>ZPE= 0.729860<br>NImag=0<br>Htot= -3249.369582<br>Gtot= -3249.482068        |
|  <p><b>PNNCo-cis-Ph-C-CH2-Ph+CH3OH</b></p>                      | HF=-3365.9100133<br>ZPE=0.788177<br>NImag=0<br>Htot=-3365.075424<br>Gtot= -3365.200193        | HF=-3365.9447167<br>ZPE= 0.786202<br>NImag=0<br>Htot= -3365.112598<br>Gtot= -3365.236649        |
|  <p><b>TS5</b></p>                                              | HF=-3365.8508647<br>ZPE= 0.783491<br>NImag=0<br>Htot= -3365.021866<br>Gtot= -3365.143890      | HF=-3365.8846552<br>ZPE= 0.781390<br>NImag=0<br>Htot= -3365.059009<br>Gtot= -3365.177529        |
|  <p><b>1,2-diphenylethane</b></p>                               | HF=-542.0150722<br>ZPE=0.238508<br>NImag=0<br>Htot=-541.763927<br>Gtot=-541.816101            | HF=-542.0271983<br>ZPE= 0.238240<br>NImag=0<br>Htot= -541.777158<br>Gtot= -541.826705           |
| <p><b>H2</b></p>                                                                                                                                   | HF=-1.1717115<br>ZPE= 0.009886<br>NImag=0<br>Htot= -1.158521                                  | HF=-1.1714131<br>ZPE= 0.009770<br>NImag=0<br>Htot= -1.158339                                    |

|                                                                                                                               |                                                                                                                   |                                                                                                                     |
|-------------------------------------------------------------------------------------------------------------------------------|-------------------------------------------------------------------------------------------------------------------|---------------------------------------------------------------------------------------------------------------------|
| 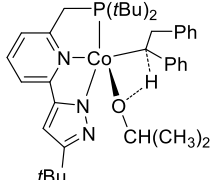 <p><b>TS6</b></p>                           | Gtot= -1.173317<br>HF=-3443.2892734<br>ZPE=0.816249<br>NImag=1 (-1288)<br>Htot=-3442.425452<br>Gtot= -3442.551269 | Gtot= -1.173134<br>HF=-3443.3231864<br>ZPE= 0.814169<br>NImag=1 (-1392)<br>Htot= -3442.462773<br>Gtot= -3442.585069 |
|  <p><b>PNNCo-OCH(CH3)2</b></p>               | HF=-2902.5417692<br>ZPE=0.604048<br>NImag=0<br>Htot=-2901.901768<br>Gtot= -2902.003045                            | HF=-2902.5787451<br>ZPE= 0.603017<br>NImag=0<br>Htot=-2901.941572<br>Gtot= -2902.036726                             |
|  <p><b>PNNCo-Cl+CH3OH</b></p>                | HF=-3284.7538725<br>ZPE=0.562282<br>NImag=0<br>Htot=-3284.156064<br>Gtot= -3284.256402                            | HF=-3284.7901109<br>ZPE= 0.561137<br>NImag=0<br>Htot= -3284.194202<br>Gtot= -3284.292601                            |
|  <p><b>PNNCo-H+CH3OH</b></p>                | HF=-2825.0708278<br>ZPE=0.567586<br>NImag=0<br>Htot=-2824.468966<br>Gtot= -2824.566995                            | HF=-2825.1036849<br>ZPE= 0.566218<br>NImag=0<br>Htot= -2824.503812<br>Gtot= -2824.600746                            |
|  <p><b>(Z)-1-nitro-4-styrylbenzene</b></p> | HF=-745.3479918<br>ZPE=0.217238<br>NImag=0<br>Htot=-745.116215<br>Gtot= -745.173392                               | HF=-745.3607471<br>ZPE=0.216623<br>NImag=0<br>Htot=-745.130334<br>Gtot= -745.185509                                 |
|  <p><b>TS5-para-NO2-1</b></p>              | HF=-3570.4134573<br>ZPE=0.785619<br>NImag=1 (-1528.1172)<br>Htot=-3569.579620<br>Gtot= -3569.708831               | HF=-3570.449241<br>ZPE= 0.783532<br>NImag= 1 (-1621.6943)<br>Htot= -3569.618010<br>Gtot= -3569.746781               |
|  <p><b>TS5-para-NO2-2</b></p>              | HF=-3570.4121497<br>ZPE=0.786211<br>NImag=1 (-1519.4193)<br>Htot=-3569.578009<br>Gtot= -3569.705936               | HF=-3570.4466722<br>ZPE= 0.783590<br>NImag=1 (-1597.4319)<br>Htot= -3569.616363<br>Gtot= -3569.740602               |
|  <p><b>(Z)-4-styrylbenzotrile</b></p>      | HF=-633.0538362<br>ZPE=0.213665<br>NImag=0<br>Htot=-632.826395<br>Gtot= -632.881232                               | HF=-633.0687026<br>ZPE=0.213462<br>NImag=0<br>Htot=-632.841393<br>Gtot= -632.896983                                 |

|                                                                                                                            |                                                                                                       |                                                                                                        |
|----------------------------------------------------------------------------------------------------------------------------|-------------------------------------------------------------------------------------------------------|--------------------------------------------------------------------------------------------------------|
| 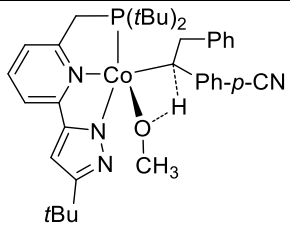 <p><b>TS5-para-CN-1</b></p>              | HF=-3458.1188259<br>ZPE=0.782268<br>NImag= 1 (-1498.8733)<br>Htot=-3457.289220<br>Gtot= -3457.415477  | HF=-3458.1561591<br>ZPE=0.780295<br>NImag= 1 (-1586.2151)<br>Htot= -3457.328967<br>Gtot= -3457.454214  |
|  <p><b>TS5-para-CN-2</b></p>              | HF=-3458.1176282<br>ZPE=0.781951<br>NImag= 1 (-1526.4252)<br>Htot= -3457.288219<br>Gtot= -3457.415708 | HF=-3458.1546741<br>ZPE= 0.779962<br>NImag= 1 (-1634.7201)<br>Htot= -3457.328661<br>Gtot= -3457.451542 |
|  <p>(Z)-1-(4-styrylphenyl)ethan-1-one</p> | HF=-693.4708321<br>ZPE=0.252187<br>NImag=0<br>Htot=-693.203069<br>Gtot=-693.262202                    | HF=-693.4876123<br>ZPE=0.251714<br>NImag=0<br>Htot=-693.221083<br>Gtot=-693.278130                     |
|  <p><b>TS5-para-COCH3-1</b></p>          | HF=-3518.5342487<br>ZPE=0.820647<br>NImag= 1 (-1508.3187)<br>Htot=-3517.664390<br>Gtot= -3517.795542  | HF=-3518.574462<br>ZPE=0.818776<br>NImag= 1 (-1600.4532)<br>Htot= -3517.707023<br>Gtot= -3517.837998   |
|  <p><b>TS5-para-COCH3-2</b></p>         | HF=-3518.5340399<br>ZPE=0.820984<br>NImag=1 (-1511.2896)<br>Htot=-3517.664006<br>Gtot= -3517.794651   | HF=-3518.5732157<br>ZPE=0.818348<br>NImag= 1 (-1593.8450)<br>Htot=-3517.706931<br>Gtot= -3517.835116   |
| H <sub>3</sub> C-OH                                                                                                        | HF=-115.7442577<br>ZPE=0.051299<br>NImag=0<br>Htot=-115.688697<br>Gtot= -115.715688                   | HF=-115.7521989<br>ZPE=0.051368<br>NImag=0<br>Htot=-115.696514<br>Gtot= -115.723627                    |
| H <sub>3</sub> B-NH <sub>3</sub>                                                                                           | HF=-83.2338934<br>ZPE=0.070413<br>NImag=0<br>Htot=-83.158727<br>Gtot= -83.186942                      | HF=-83.257141<br>ZPE= 0.070185<br>NImag=0<br>Htot= -83.182179<br>Gtot= -83.210478                      |
| H <sub>2</sub> B=NH <sub>2</sub>                                                                                           | HF=-82.0552494<br>ZPE=0.048164<br>NImag=0<br>Htot=-82.002907<br>Gtot= -82.028826                      | HF=-82.0591652<br>ZPE= 0.047700<br>NImag=0<br>Htot= -82.007254<br>Gtot= -82.033219                     |
| H <sub>3</sub> CO-H <sub>2</sub> B-NH <sub>3</sub>                                                                         | HF=-197.8224553<br>ZPE=0.104445<br>NImag=0<br>Htot=-197.710799<br>Gtot= -197.746890                   | HF=-197.8446269<br>ZPE= 0.104361<br>NImag=0<br>Htot= -197.733124<br>Gtot= -197.769269                  |
| Cl-H <sub>2</sub> B-NH <sub>3</sub>                                                                                        | HF=-542.8918859<br>ZPE=0.064039<br>NImag=0<br>Htot=-542.822491<br>Gtot= -542.854485                   | HF=-542.9173884<br>ZPE= 0.064083<br>NImag=0<br>Htot= -542.848047<br>Gtot= -542.879821                  |

|                                                                                                   |                                                                                      |                                                                                        |
|---------------------------------------------------------------------------------------------------|--------------------------------------------------------------------------------------|----------------------------------------------------------------------------------------|
| 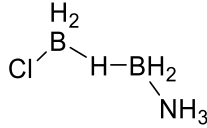                 | HF=-569.5342037<br>ZPE=0.095632<br>NImag=0<br>Htot=-569.430762<br>Gtot= -569.469493  | HF=-569.5581873<br>ZPE= 0.095760<br>NImag= 0<br>Htot= -569.454881<br>Gtot= -569.492459 |
| Cl-BH <sub>2</sub>                                                                                | HF= -486.2763491<br>ZPE=0.021290<br>NImag=0<br>Htot=-486.251105<br>Gtot= -486.278337 | HF=-486.2787335<br>ZPE= 0.021132<br>NImag=0<br>Htot= -486.253638<br>Gtot= -486.280882  |
|                  | HF=-53.3012993<br>ZPE=0.063984<br>NImag=0<br>Htot=-53.232786<br>Gtot= -53.259113     | HF=-53.3030634<br>ZPE= 0.063708<br>NImag=0<br>Htot= -53.234819<br>Gtot= -53.261151     |
|                  | HF=-972.5946649<br>ZPE=0.050149<br>NImag=0<br>Htot=-972.538532<br>Gtot= -972.572862  | HF=-972.6029255<br>ZPE= 0.049830<br>NImag=0<br>Htot= -972.547059<br>Gtot= -972.581527  |
| H <sub>2</sub> B-OCH <sub>3</sub>                                                                 | HF=-141.2347606<br>ZPE=0.063780<br>NImag=0<br>Htot=-141.165791<br>Gtot= -141.196199  | HF=-141.2366037<br>ZPE= 0.063547<br>NImag=0<br>Htot= -141.167824<br>Gtot= -141.198368  |
| NH <sub>3</sub>                                                                                   | HF=-56.5678688<br>ZPE=0.034537<br>NImag=0<br>Htot=-56.529522<br>Gtot= -56.551356     | HF=-56.5745536<br>ZPE= 0.034358<br>NImag=0<br>Htot= -56.536385<br>Gtot= -56.558219     |
| BH <sub>3</sub>                                                                                   | HF=-26.6135415<br>ZPE=0.026428<br>NImag=0<br>Htot=-26.583280<br>Gtot= -26.605300     | HF=-26.614437<br>ZPE= 0.026208<br>NImag=0<br>Htot= -26.584390<br>Gtot= -26.606417      |
|                | HF=-312.4209094<br>ZPE=0.138154<br>NImag=0<br>Htot=-312.272847<br>Gtot= -312.316515  | HF=-312.4423422<br>ZPE= 0.138048<br>NImag=0<br>Htot= -312.295308<br>Gtot= -312.336587  |
|                | HF=-255.8495103<br>ZPE=0.098538<br>NImag=0<br>Htot=-255.743156<br>Gtot= -255.782367  | HF=-255.8529767<br>ZPE= 0.098445<br>NImag=0<br>Htot= -255.746753<br>Gtot= -255.785033  |
|                | HF=-427.0217243<br>ZPE=0.171866<br>NImag=0<br>Htot=-426.837425<br>Gtot= -426.885378  | HF=-427.0420082<br>ZPE= 0.171434<br>NImag=0<br>Htot= -426.859736<br>Gtot= -426.903980  |
|                | HF=-370.4574906<br>ZPE=0.132399<br>NImag=0<br>Htot=-370.314306<br>Gtot= -370.361379  | HF=-370.4625145<br>ZPE= 0.132553<br>NImag=0<br>Htot= -370.319392<br>Gtot= -370.364181  |
|                | HF=-194.3945237<br>ZPE=0.108283<br>NImag=0<br>Htot=-194.279872<br>Gtot= -194.313587  | HF=-194.4048783<br>ZPE= 0.107815<br>NImag=0<br>Htot= -194.290543<br>Gtot= -194.324617  |
| <br>BH2Iso-NH3 | HF=-276.4693244<br>ZPE=0.161310<br>NImag=0<br>Htot=-276.298474<br>Gtot= -276.340706  | HF=-276.4930189<br>ZPE= 0.161151<br>NImag=0<br>Htot= -276.322456<br>Gtot= -276.364289  |

**Table S 10.** M06L/TZVP optimised Cartesian Coordinates in gas phase.

| 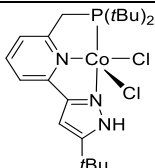 <p><b>1a-Douplet</b></p>                                                                                                                                                                                                                                                                                                                                                                                                                                                                                                                                                                                                                                                                                                                                                                                                                                                                                                                                                                                                                                                                                                                                                                                                                                                                                                                                                                                                                                                                                                                                                                                                                                                                                                                                                                                                                                                                                                                                                                                                                                                                                                                                                                                                                                                                                                                                                                                                                                                                                                                                                                                                                                                                                                                                                                                                                                                     |  <p><b>1a-Quartet</b></p>                                                                                                                                                                                                                                                                                                                                                                                                                                                                                                                                                                                                                                                                                                                                                                                                                                                                                                                                                                                                                                                                                                                                                                                                                                                                                                                                                                                                                                                                                                                                                                                                                                                                                                                                                                                                                                                                                                                                                                                                                                                                                                                                                                                                                                                                                                                                                                                                                                                                                                                                                                                                                                                                                                                                                                                                                                                        |
|----------------------------------------------------------------------------------------------------------------------------------------------------------------------------------------------------------------------------------------------------------------------------------------------------------------------------------------------------------------------------------------------------------------------------------------------------------------------------------------------------------------------------------------------------------------------------------------------------------------------------------------------------------------------------------------------------------------------------------------------------------------------------------------------------------------------------------------------------------------------------------------------------------------------------------------------------------------------------------------------------------------------------------------------------------------------------------------------------------------------------------------------------------------------------------------------------------------------------------------------------------------------------------------------------------------------------------------------------------------------------------------------------------------------------------------------------------------------------------------------------------------------------------------------------------------------------------------------------------------------------------------------------------------------------------------------------------------------------------------------------------------------------------------------------------------------------------------------------------------------------------------------------------------------------------------------------------------------------------------------------------------------------------------------------------------------------------------------------------------------------------------------------------------------------------------------------------------------------------------------------------------------------------------------------------------------------------------------------------------------------------------------------------------------------------------------------------------------------------------------------------------------------------------------------------------------------------------------------------------------------------------------------------------------------------------------------------------------------------------------------------------------------------------------------------------------------------------------------------------------------------------------------------------------------------------------------------------|-------------------------------------------------------------------------------------------------------------------------------------------------------------------------------------------------------------------------------------------------------------------------------------------------------------------------------------------------------------------------------------------------------------------------------------------------------------------------------------------------------------------------------------------------------------------------------------------------------------------------------------------------------------------------------------------------------------------------------------------------------------------------------------------------------------------------------------------------------------------------------------------------------------------------------------------------------------------------------------------------------------------------------------------------------------------------------------------------------------------------------------------------------------------------------------------------------------------------------------------------------------------------------------------------------------------------------------------------------------------------------------------------------------------------------------------------------------------------------------------------------------------------------------------------------------------------------------------------------------------------------------------------------------------------------------------------------------------------------------------------------------------------------------------------------------------------------------------------------------------------------------------------------------------------------------------------------------------------------------------------------------------------------------------------------------------------------------------------------------------------------------------------------------------------------------------------------------------------------------------------------------------------------------------------------------------------------------------------------------------------------------------------------------------------------------------------------------------------------------------------------------------------------------------------------------------------------------------------------------------------------------------------------------------------------------------------------------------------------------------------------------------------------------------------------------------------------------------------------------------------------------------------------------------------------------------------------------------|
| <p>Co,0,-0.0670756794,-0.1898917832,1.0364216748<br/> P,0,0.0451708493,2.0136384156,0.8353025196<br/> N,0,-1.6063603358,0.1533633143,2.1998854628<br/> C,0,-3.7972564097,0.4644948748,3.8507062987<br/> C,0,-2.3374149592,-0.9311872279,2.5811747746<br/> C,0,-1.9160571168,1.3736223577,2.6751398393<br/> C,0,-3.0246962518,1.5589404646,3.4879651193<br/> C,0,-3.4412368792,-0.7973463358,3.4091905844<br/> H,0,-3.2630635922,2.5518976965,3.8449075574<br/> H,0,-4.0065393233,-1.6742342755,3.6944931869<br/> H,0,-4.6617976522,0.5954251856,4.4882776518<br/> C,0,-0.9471947453,2.4603179715,2.3429558161<br/> H,0,0.209406168,2.4749416049,3.1506226657<br/> H,0,-1.4161143689,3.4449391037,2.3110748932<br/> C,0,-1.0058258852,2.5610070598,-0.650991507<br/> C,0,1.6681721043,2.989447616,0.9539084633<br/> C,0,2.6990669626,2.1882702791,0.1573068727<br/> H,0,3.6582264336,2.7110288606,0.186907995<br/> H,0,2.4172293425,2.0588648884,-0.8877727118<br/> H,0,2.831090515,1.1939241044,0.5853387833<br/> C,0,2.1172999242,3.0496463204,2.4145052502<br/> H,0,3.140650965,3.4315463049,2.4386887784<br/> H,0,2.1109115997,2.0665564785,2.8869895884<br/> H,0,1.5074881533,3.7396221141,3.0010047631<br/> C,0,1.5683747605,4.4196535933,0.4325340224<br/> H,0,2.5346420459,4.9085087383,0.5802736852<br/> H,0,0.8272190136,5.0056056557,0.9794977592<br/> H,0,1.3399091487,4.4792510655,-0.6301018759<br/> C,0,-0.1681943078,2.4451836812,-1.9237879665<br/> H,0,0.6255484968,3.1892184982,-1.9745147836<br/> H,0,-0.8139518108,2.6013245607,-2.7916444304<br/> H,0,0.2820918766,1.4547576802,-2.0131586655<br/> C,0,-2.1568323951,1.5540885754,-0.7508325351<br/> H,0,-1.7897743269,0.5358262876,-0.8969356421<br/> H,0,-2.7792393431,1.8092052499,-1.6122851087<br/> H,0,-2.7997747393,1.5660741752,0.1310971904<br/> C,0,-1.6024999887,3.958527963,-0.514520058<br/> H,0,-0.8517390922,4.7431967301,-0.4652764232<br/> H,0,-2.2460194023,4.0463636488,0.3626029971<br/> H,0,-2.2285777704,4.163930637,-1.3867023953<br/> Cl,0,1.0867263912,-0.8415025366,-0.8201402132<br/> Cl,0,1.3866784053,-0.3214685569,2.9503131527<br/> C,0,-1.8253547231,-2.16125773,2.0244492516<br/> N,0,-0.7492478182,-1.9807307927,1.2523837111<br/> C,0,-2.13760595,-3.5301274653,2.075205706<br/> H,0,-2.9401313441,-4.0071256628,2.6097643136<br/> C,0,-1.1895340682,-4.160354856,1.2903958249<br/> H,0,-0.3748369328,-3.1788840582,0.8212181172<br/> N,0,0.407274713,-3.1952355634,0.1750319897<br/> C,0,-0.9762464964,-5.6066333508,0.940073181<br/> C,0,-2.0345740834,-6.456644575,1.636810627<br/> H,0,-1.9758138468,-6.3580192886,2.7214668981<br/> H,0,-1.8892516105,-7.5086630899,1.3909533931<br/> H,0,-3.0418385939,-6.1788226601,1.3232811755<br/> C,0,-1.0929105009,-5.7909088742,-0.5774622335<br/> H,0,-0.3398284009,-5.2149613468,-1.1168769666<br/> H,0,-2.0730531497,-5.4804643286,-0.9404556753<br/> H,0,-0.9521197437,-6.8403300974,-0.839862371</p> | <p>Co,0,0.498836086,-0.2828144141,1.2104021084<br/> P,0,0.2421511532,2.0734982393,0.8439125588<br/> N,0,-1.3507402851,0.0853703414,2.3249573351<br/> C,0,-3.7274352665,0.466139401,3.6524185618<br/> C,0,-2.1361223508,-0.9714325372,2.6127802119<br/> C,0,-1.7066581224,1.3205185507,2.6952703505<br/> C,0,-2.9104727804,1.5448064496,3.3575393824<br/> C,0,-3.3392800378,-0.8120058942,3.2879758432<br/> H,0,-3.1915907508,2.5520960129,3.6355558785<br/> H,0,-3.9582957371,-1.6710788318,3.5086271658<br/> H,0,-4.6663726589,0.6212463431,4.1690150153<br/> C,0,-0.7354832635,2.4198844777,2.3949814043<br/> H,0,0.0186891555,2.4067813034,3.1878416824<br/> H,0,-1.2215238311,3.3969188146,2.4247430157<br/> C,0,-0.9658019131,2.4541866818,-0.5725766862<br/> C,0,1.6757610378,3.3149969521,0.8924572792<br/> C,0,2.7593820625,2.740508028,-0.0245122864<br/> H,0,3.6379659024,3.3899323068,0.0021076199<br/> H,0,2.4367988989,2.6615090427,-1.0619427848<br/> H,0,3.0620652213,1.744936846,0.3022479375<br/> C,0,2.2256306886,3.3426949237,2.3201225704<br/> H,0,3.186308701,3.8631438389,2.313498476<br/> H,0,2.3902517718,2.3402455553,2.7193679342<br/> H,0,1.5712464997,3.8904317371,3.0002602793<br/> C,0,1.3207950775,4.7380560556,0.4790691272<br/> H,0,2.2013960812,5.3750630725,0.6000211713<br/> H,0,0.5303365384,5.1617776105,1.1014578019<br/> H,0,1.0132478681,4.814210277,-0.5632732897<br/> C,0,-0.1697789859,2.4880230032,-1.8764596375<br/> H,0,0.4918464642,3.3511831081,-1.9416328137<br/> H,0,-0.8616344915,2.5456234825,-2.7206078402<br/> H,0,0.4270005095,1.5810728252,-1.9975615316<br/> C,0,-1.9345337277,1.2676969468,-0.6548207069<br/> H,0,-1.4049609402,0.3180130726,-0.7662540766<br/> H,0,-2.5729635002,1.3917768897,-1.5335128309<br/> H,0,-2.5919850927,1.2038641732,0.2131550844<br/> C,0,-1.7819456438,3.7291564841,-0.3933668296<br/> H,0,-1.1696519769,4.6272229967,-0.3517750917<br/> H,0,-2.3953046991,3.6944478648,0.509586624<br/> H,0,-2.4686466614,3.8422038925,-1.2368464823<br/> Cl,0,1.2223537611,-1.0589915663,-0.8529052517<br/> Cl,0,1.9185087334,-0.2310316085,2.9905415475<br/> C,0,-1.6311313237,-2.2400285287,2.1109655371<br/> N,0,-0.4554340282,-2.187040522,1.4859642985<br/> C,0,-2.1470967654,-3.5472084767,2.0624880454<br/> H,0,-3.0729130684,-3.9129844252,2.4712886763<br/> C,0,-1.2174026031,-4.2858071223,1.3552415397<br/> N,0,-0.2228383885,-3.4163940578,1.0406523738<br/> H,0,0.584664547,-3.5344757799,0.4418383813<br/> C,0,-1.1794650432,-5.7312993873,0.9433553455<br/> C,0,-2.429296538,-6.437828461,1.4601522335<br/> H,0,-2.4899337771,-6.398233887,2.548544471<br/> H,0,-2.4134743956,-7.487612421,1.1666729658<br/> H,0,-3.3378888189,-5.9930891859,1.0519860942<br/> C,0,-1.136079855,-5.8270880598,-0.5863020037<br/> H,0,-0.2469947603,-5.3501168006,-1.0009487053<br/> H,0,-2.0077369823,-5.352960962,-1.0378630289<br/> H,0,-1.1208835734,-6.8728096053,-0.8964234693</p> |

|                                                                                                                                                                                                                                                                                                                                                                                                                                                                                                                                                                                                                                                                                                                                                                                                                                                                                                                                                                                                                                                                                                                                                                                                                                                                                                                                                                                                                                                                                                                                                                                                                                                                                                                                                                                                                                                                                                                                                                                                                                                                                                                                                                                                                                                                                                                                                                                                                                                                                                                                                                                                                                                                                                                                                                                                                                                                           |                                                                                                                                                                                                                                                                                                                                                                                                                                                                                                                                                                                                                                                                                                                                                                                                                                                                                                                                                                                                                                                                                                                                                                                                                                                                                                                                                                                                                                                                                                                                                                                                                                                                                                                                                                                                                                                                                                                                                                                                                                                                                                                                                                                                                                                                                                                                                                                                                                                                                                                                                                                                                                                                                                                                                                                                                                                             |
|---------------------------------------------------------------------------------------------------------------------------------------------------------------------------------------------------------------------------------------------------------------------------------------------------------------------------------------------------------------------------------------------------------------------------------------------------------------------------------------------------------------------------------------------------------------------------------------------------------------------------------------------------------------------------------------------------------------------------------------------------------------------------------------------------------------------------------------------------------------------------------------------------------------------------------------------------------------------------------------------------------------------------------------------------------------------------------------------------------------------------------------------------------------------------------------------------------------------------------------------------------------------------------------------------------------------------------------------------------------------------------------------------------------------------------------------------------------------------------------------------------------------------------------------------------------------------------------------------------------------------------------------------------------------------------------------------------------------------------------------------------------------------------------------------------------------------------------------------------------------------------------------------------------------------------------------------------------------------------------------------------------------------------------------------------------------------------------------------------------------------------------------------------------------------------------------------------------------------------------------------------------------------------------------------------------------------------------------------------------------------------------------------------------------------------------------------------------------------------------------------------------------------------------------------------------------------------------------------------------------------------------------------------------------------------------------------------------------------------------------------------------------------------------------------------------------------------------------------------------------------|-------------------------------------------------------------------------------------------------------------------------------------------------------------------------------------------------------------------------------------------------------------------------------------------------------------------------------------------------------------------------------------------------------------------------------------------------------------------------------------------------------------------------------------------------------------------------------------------------------------------------------------------------------------------------------------------------------------------------------------------------------------------------------------------------------------------------------------------------------------------------------------------------------------------------------------------------------------------------------------------------------------------------------------------------------------------------------------------------------------------------------------------------------------------------------------------------------------------------------------------------------------------------------------------------------------------------------------------------------------------------------------------------------------------------------------------------------------------------------------------------------------------------------------------------------------------------------------------------------------------------------------------------------------------------------------------------------------------------------------------------------------------------------------------------------------------------------------------------------------------------------------------------------------------------------------------------------------------------------------------------------------------------------------------------------------------------------------------------------------------------------------------------------------------------------------------------------------------------------------------------------------------------------------------------------------------------------------------------------------------------------------------------------------------------------------------------------------------------------------------------------------------------------------------------------------------------------------------------------------------------------------------------------------------------------------------------------------------------------------------------------------------------------------------------------------------------------------------------------------|
| <p>C,0,0.4171338121,-6.0465249146,1.4039478725<br/> H,0,0.537435804,-5.9136875684,2.4790540189<br/> H,0,1.2079980104,-5.4811881024,0.9097929526<br/> H,0,0.5733336505,-7.1009531037,1.1720838402</p>                                                                                                                                                                                                                                                                                                                                                                                                                                                                                                                                                                                                                                                                                                                                                                                                                                                                                                                                                                                                                                                                                                                                                                                                                                                                                                                                                                                                                                                                                                                                                                                                                                                                                                                                                                                                                                                                                                                                                                                                                                                                                                                                                                                                                                                                                                                                                                                                                                                                                                                                                                                                                                                                      | <p>C,0,0.0657438341,-6.4020909613,1.5342350225<br/> H,0,0.0714696154,-6.3393849795,2.6225454442<br/> H,0,0.9860044549,-5.9439711953,1.169921103<br/> H,0,0.0919811744,-7.4563943305,1.2554989506</p>                                                                                                                                                                                                                                                                                                                                                                                                                                                                                                                                                                                                                                                                                                                                                                                                                                                                                                                                                                                                                                                                                                                                                                                                                                                                                                                                                                                                                                                                                                                                                                                                                                                                                                                                                                                                                                                                                                                                                                                                                                                                                                                                                                                                                                                                                                                                                                                                                                                                                                                                                                                                                                                        |
|  <p><b>PNNCo-Cl-Double</b></p>                                                                                                                                                                                                                                                                                                                                                                                                                                                                                                                                                                                                                                                                                                                                                                                                                                                                                                                                                                                                                                                                                                                                                                                                                                                                                                                                                                                                                                                                                                                                                                                                                                                                                                                                                                                                                                                                                                                                                                                                                                                                                                                                                                                                                                                                                                                                                                                                                                                                                                                                                                                                                                                                                                                                                           |  <p><b>PNNCo-Cl-Quartet</b></p>                                                                                                                                                                                                                                                                                                                                                                                                                                                                                                                                                                                                                                                                                                                                                                                                                                                                                                                                                                                                                                                                                                                                                                                                                                                                                                                                                                                                                                                                                                                                                                                                                                                                                                                                                                                                                                                                                                                                                                                                                                                                                                                                                                                                                                                                                                                                                                                                                                                                                                                                                                                                                                                                                                                                            |
| <p>Co,0,-0.1370345674,-0.1913640348,0.9719586931<br/> P,0,-0.0400569774,2.0175490111,0.7381293756<br/> N,0,-1.6357966221,0.1750201531,2.1696844485<br/> C,0,-3.9146423265,0.4866915094,3.6894514796<br/> C,0,-2.3624889018,-0.9266499448,2.5350499441<br/> C,0,-2.0164504641,1.4064120132,2.5617116381<br/> C,0,-3.1607606546,1.5958736324,3.3181014723<br/> C,0,-3.5156677725,-0.7757188654,3.3076403466<br/> H,0,-3.4472030747,2.5951775366,3.615865903<br/> H,0,-4.0830150818,-1.6534260667,3.5844481089<br/> H,0,-4.8122489552,0.6164287062,4.2809831552<br/> C,0,-1.1085243983,2.5307782002,2.1714266002<br/> H,0,-0.4272362607,2.7347850281,3.0033234849<br/> H,0,-1.6610130874,3.4567510728,1.997034561<br/> C,0,-0.986271482,2.5885068459,-0.7946212992<br/> C,0,1.5723625369,2.9559080203,1.0165448303<br/> C,0,2.4016715887,2.9627165412,-0.2646311834<br/> H,0,3.3976694732,3.3522232834,-0.0413634944<br/> H,0,1.9679779942,3.6083554845,-1.0291569414<br/> H,0,2.5150010052,1.9568099495,-0.6708133284<br/> C,0,2.3151672438,2.1511007205,2.086039569<br/> H,0,3.2554529963,2.6512921213,2.3290168709<br/> H,0,2.54366608,1.1450640367,1.7315924095<br/> H,0,1.7444226311,2.0689782682,3.0145871417<br/> C,0,1.3553954189,4.3844651292,1.5100092643<br/> H,0,2.3290924883,4.8527944191,1.6727817307<br/> H,0,0.8231965505,4.4242950926,2.4610329794<br/> H,0,0.8158627527,5.0024868553,0.7943429032<br/> C,0,-0.353692859,1.9530880899,-2.0322336285<br/> H,0,0.6535410192,2.3178528253,-2.2228778408<br/> H,0,-0.9642873041,2.1906922441,-2.9065923998<br/> H,0,-0.2904779913,0.8683044775,-1.9415572003<br/> C,0,-2.4040298681,2.0317189018,-0.6390177886<br/> H,0,-2.4020415512,0.9484987535,-0.4945861999<br/> H,0,-2.972282419,2.2385471871,-1.5482581867<br/> H,0,-2.9468079419,2.4823649251,0.1936033103<br/> C,0,-1.0461724474,4.1033964419,-0.9434338339<br/> H,0,-0.0683940912,4.5326566452,-1.1613956836<br/> H,0,-1.4459408755,4.5971758127,-0.055361245<br/> H,0,-1.7032874657,4.3606024889,-1.7780134186<br/> Cl,0,1.6182795534,-0.6114692119,-0.3191940058<br/> C,0,-1.8187154684,-2.1454554462,2.0427276225<br/> N,0,-0.6831965662,-2.0202109282,1.2914555323<br/> C,0,-2.1326862815,-3.500776746,2.1290983943<br/> H,0,-2.9605818579,-3.9576351673,2.6460449276<br/> C,0,-1.1267021004,-4.1230121352,1.3937198124<br/> N,0,-0.2612882602,-3.2090494184,0.8934279051<br/> C,0,-0.9036491076,-5.5859164735,1.1066104728<br/> C,0,-1.9822695877,-6.4290666226,1.7788870128<br/> H,0,-1.9752198698,-6.2985388662,2.8628700801<br/> H,0,-1.820841052,-7.4884258925,1.5725535322<br/> H,0,-2.9786130457,-6.1699441042,1.4151175674<br/> C,0,-0.9457407951,-5.811619284,-0.4076141621<br/> H,0,-0.1925193042,-5.2027619291,-0.9065444517<br/> H,0,-1.9202995547,-5.5424970153,-0.8187431915<br/> H,0,-0.7570099525,-6.8608976949,-0.6460767883</p> | <p>Co,0,0.5082367164,-0.3368387765,1.6552461776<br/> P,0,0.226599138,1.9478950748,0.9366887817<br/> N,0,-1.3104263417,0.1814945163,2.5806208103<br/> C,0,-3.8069596791,0.6494635355,3.5944846685<br/> C,0,-2.1717888299,-0.8523201339,2.7049770601<br/> C,0,-1.680545186,1.4346878866,2.8553972554<br/> C,0,-2.9350262901,1.7132516126,3.3758607369<br/> C,0,-3.4408374106,-0.6367388655,3.2489591984<br/> H,0,-3.2236624728,2.7320880447,3.5978070155<br/> H,0,-4.1285300415,-1.4638325799,3.3613294441<br/> H,0,-4.78976091,0.8365249741,4.0093562288<br/> C,0,-0.6527318505,2.4667305599,2.5043686015<br/> H,0,0.1260995027,2.4701193326,3.2713053102<br/> H,0,-1.0741851678,3.4721745677,2.4565409431<br/> C,0,-1.0471577672,2.1805988775,-0.4549655622<br/> C,0,1.6799771356,3.1579410561,0.7831071535<br/> C,0,2.7136066875,2.4998694981,-0.1327942832<br/> H,0,3.5913033291,3.1453699443,-0.2118404629<br/> H,0,2.3391010035,2.3318779154,-1.141886791<br/> H,0,3.0398463762,1.5415526103,0.2739487386<br/> C,0,2.3059724957,3.3211988411,2.1703244641<br/> H,0,3.2590949094,3.8431430543,2.0602463428<br/> H,0,2.5062245656,2.363083539,2.6513778411<br/> H,0,1.6844602143,3.9261091356,2.8312277833<br/> C,0,1.2965087775,4.5389495899,0.2628098066<br/> H,0,2.1806997235,5.1811798034,0.2793358154<br/> H,0,0.541381592,5.0175680183,0.8886313375<br/> H,0,0.9317274377,4.525165038,-0.7631936632<br/> C,0,-0.3112513129,2.126133884,-1.7931508198<br/> H,0,0.3445677269,2.9806350447,-1.9527124712<br/> H,0,-1.0421337091,2.1217395879,-2.6048785023<br/> H,0,0.2851956342,1.2168005652,-1.8879267973<br/> C,0,-2.01035459,0.9881460508,-0.403262336<br/> H,0,-1.4894116063,0.0279095906,-0.3928825367<br/> H,0,-2.6436101,1.0102801662,-1.2934510365<br/> H,0,-2.6703031403,1.0226952087,0.4625638673<br/> C,0,-1.8615716759,3.464373122,-0.3359888432<br/> H,0,-1.2543182752,4.3649811968,-0.3954468468<br/> H,0,-2.4303376943,3.4954988047,0.5948114091<br/> H,0,-2.587699418,3.5064194318,-1.1518329941<br/> Cl,0,2.2384533311,-0.2141876674,3.0333649017<br/> C,0,-1.6757871595,-2.0758335908,2.1358286534<br/> N,0,-0.4946263145,-2.0006799147,1.4418026729<br/> C,0,-2.1548987895,-3.372673538,2.0293452354<br/> H,0,-3.0583795868,-3.7805929716,2.4520112848<br/> C,0,-1.192776328,-4.0328594267,1.2545325264<br/> N,0,-0.2020315122,-3.1918484979,0.9083722278<br/> C,0,-1.1480639503,-5.4712345332,0.8032923618<br/> C,0,-2.3743476881,-6.2252702885,1.3080679308<br/> H,0,-2.4255988115,-6.2224879695,2.3984848953<br/> H,0,-2.3412719495,-7.2660488978,0.981960199<br/> H,0,-3.2993908621,-5.7885605723,0.9263827408<br/> C,0,-1.1137551734,-5.5174474668,-0.7270201619<br/> H,0,-0.2507462707,-4.9723101851,-1.1079815973<br/> H,0,-2.0108809175,-5.0669646378,-1.1553953267<br/> H,0,-1.0537128588,-6.5495920898,-1.0795200104</p> |

|                                                                                                                                                                                                                                                                                                                                                                                                                                                                                                                                                                                                                                                                                                                                                                                                                                                                                                                                                                                                                                                                                                                                                                                                                                                                                                                                                                                                                                                                                                                                                                                                                                                                                                                                                                                                                                                                                                                                                                                                                                                                                                                                                                                                                                                                                                                                                                                                                                                                                                                                                                                                                                                                                                                                                                                                         |                                                                                                                                                                                                                                                                                                                                                                                                                                                                                                                                                                                                                                                                                                                                                                                                                                                                                                                                                                                                                                                                                                                                                                                                                                                                                                                                                                                                                                                                                                                                                                                                                                                                                                                                                                                                                                                                                                                                                                                                                                                                                                                                                                                                                                                                                                                                                                                                                                                                                                                                                                                                                                                                                                                                                                                                               |
|---------------------------------------------------------------------------------------------------------------------------------------------------------------------------------------------------------------------------------------------------------------------------------------------------------------------------------------------------------------------------------------------------------------------------------------------------------------------------------------------------------------------------------------------------------------------------------------------------------------------------------------------------------------------------------------------------------------------------------------------------------------------------------------------------------------------------------------------------------------------------------------------------------------------------------------------------------------------------------------------------------------------------------------------------------------------------------------------------------------------------------------------------------------------------------------------------------------------------------------------------------------------------------------------------------------------------------------------------------------------------------------------------------------------------------------------------------------------------------------------------------------------------------------------------------------------------------------------------------------------------------------------------------------------------------------------------------------------------------------------------------------------------------------------------------------------------------------------------------------------------------------------------------------------------------------------------------------------------------------------------------------------------------------------------------------------------------------------------------------------------------------------------------------------------------------------------------------------------------------------------------------------------------------------------------------------------------------------------------------------------------------------------------------------------------------------------------------------------------------------------------------------------------------------------------------------------------------------------------------------------------------------------------------------------------------------------------------------------------------------------------------------------------------------------------|---------------------------------------------------------------------------------------------------------------------------------------------------------------------------------------------------------------------------------------------------------------------------------------------------------------------------------------------------------------------------------------------------------------------------------------------------------------------------------------------------------------------------------------------------------------------------------------------------------------------------------------------------------------------------------------------------------------------------------------------------------------------------------------------------------------------------------------------------------------------------------------------------------------------------------------------------------------------------------------------------------------------------------------------------------------------------------------------------------------------------------------------------------------------------------------------------------------------------------------------------------------------------------------------------------------------------------------------------------------------------------------------------------------------------------------------------------------------------------------------------------------------------------------------------------------------------------------------------------------------------------------------------------------------------------------------------------------------------------------------------------------------------------------------------------------------------------------------------------------------------------------------------------------------------------------------------------------------------------------------------------------------------------------------------------------------------------------------------------------------------------------------------------------------------------------------------------------------------------------------------------------------------------------------------------------------------------------------------------------------------------------------------------------------------------------------------------------------------------------------------------------------------------------------------------------------------------------------------------------------------------------------------------------------------------------------------------------------------------------------------------------------------------------------------------------|
| <p>C,0,0.473216253,-5.997702352,1.635531758<br/> H,0,0.5350336172,-5.8654590555,2.7170917024<br/> H,0,1.2555860854,-5.392069695,1.1795357229<br/> H,0,0.672984154,-7.0482076739,1.411964809</p>                                                                                                                                                                                                                                                                                                                                                                                                                                                                                                                                                                                                                                                                                                                                                                                                                                                                                                                                                                                                                                                                                                                                                                                                                                                                                                                                                                                                                                                                                                                                                                                                                                                                                                                                                                                                                                                                                                                                                                                                                                                                                                                                                                                                                                                                                                                                                                                                                                                                                                                                                                                                         | <p>C,0,0.1201419039,-6.1303687441,1.3532675327<br/> H,0,0.1251654471,-6.125888734,2.4443020788<br/> H,0,1.0079010311,-5.5976585785,1.0142778685<br/> H,0,0.1898518625,-7.1680571799,1.019228141</p>                                                                                                                                                                                                                                                                                                                                                                                                                                                                                                                                                                                                                                                                                                                                                                                                                                                                                                                                                                                                                                                                                                                                                                                                                                                                                                                                                                                                                                                                                                                                                                                                                                                                                                                                                                                                                                                                                                                                                                                                                                                                                                                                                                                                                                                                                                                                                                                                                                                                                                                                                                                                           |
| 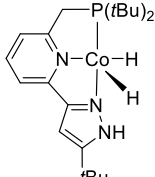 <p><b>PNNCo(H)2-Double</b></p>                                                                                                                                                                                                                                                                                                                                                                                                                                                                                                                                                                                                                                                                                                                                                                                                                                                                                                                                                                                                                                                                                                                                                                                                                                                                                                                                                                                                                                                                                                                                                                                                                                                                                                                                                                                                                                                                                                                                                                                                                                                                                                                                                                                                                                                                                                                                                                                                                                                                                                                                                                                                                                                                                        |  <p><b>PNNCo(H)2-Quartet</b></p>                                                                                                                                                                                                                                                                                                                                                                                                                                                                                                                                                                                                                                                                                                                                                                                                                                                                                                                                                                                                                                                                                                                                                                                                                                                                                                                                                                                                                                                                                                                                                                                                                                                                                                                                                                                                                                                                                                                                                                                                                                                                                                                                                                                                                                                                                                                                                                                                                                                                                                                                                                                                                                                                                             |
| <p>Co,0,-0.0558203648,-0.1635788365,1.0289463142<br/> P,0,-0.002353352,1.9772749969,0.8065921017<br/> N,0,-1.5687863703,0.1586581799,2.2245568902<br/> C,0,-3.8953164975,0.4636059416,3.7149527009<br/> C,0,-2.34450068,-0.9320167634,2.5431701979<br/> C,0,-1.9443313154,1.3846766395,2.6588095703<br/> C,0,-3.0967756036,1.5705830599,3.3928953078<br/> C,0,-3.5101856334,-0.7906080179,3.2922687323<br/> H,0,-3.3676538628,2.5653723982,3.7215810019<br/> H,0,-4.1067349527,-1.6650828014,3.5197399654<br/> H,0,-4.8038208529,0.5947767511,4.2877236999<br/> C,0,-0.9839491501,2.4803898377,2.3166186853<br/> H,0,-0.2523416483,2.549385902,3.125071688<br/> H,0,-1.4719535221,3.4536654557,2.2478532725<br/> C,0,-1.0395274901,2.6464374354,-0.6524280446<br/> C,0,1.6510005332,2.9026680957,0.9441382636<br/> C,0,2.6346583739,2.2073060149,0.0019171976<br/> H,0,3.6208997701,2.6678571964,0.1032542274<br/> H,0,2.3404734413,2.2841055034,-1.0441425022<br/> H,0,2.7137930889,1.1482923418,0.2476290577<br/> C,0,2.1726596501,2.730089082,2.3721520571<br/> H,0,3.2220948355,3.032851935,2.4040324466<br/> H,0,2.1083367538,1.6903949843,2.697079808<br/> H,0,1.6389929447,3.3563445785,3.0883590821<br/> C,0,1.5711354779,4.3912160456,0.6273256219<br/> H,0,2.5427676575,4.8545704054,0.8198522478<br/> H,0,0.8383281228,4.9076833727,1.2506853679<br/> H,0,1.3276755194,4.5841563494,-0.4172820254<br/> C,0,-0.2171234366,2.5434223961,-1.9335802769<br/> H,0,0.583258407,3.2829417725,-1.9741182479<br/> H,0,-0.86116443,2.7151663955,-2.8001987687<br/> H,0,0.2282970467,1.5519696131,-2.0395953606<br/> C,0,-2.2288944018,1.6870240985,-0.7632211088<br/> H,0,-1.900760204,0.6578050618,-0.9251187681<br/> H,0,-2.8579143758,1.9819574119,-1.6076293832<br/> H,0,-2.8526899925,1.6987492247,0.1327701682<br/> C,0,-1.5824302199,4.0614114824,-0.4806109106<br/> H,0,-0.8030098861,4.8143201383,-0.3893133625<br/> H,0,-2.2380999492,4.1447811205,0.3870243736<br/> H,0,-2.184687021,4.3245794146,-1.3549552628<br/> H,0,1.0004057021,-0.4615126612,-0.0067801649<br/> H,0,1.0896554314,-0.1401985046,2.0225288518<br/> C,0,-1.8143786259,-2.136239139,1.9879015577<br/> N,0,-0.7307418042,-1.9513937834,1.192346272<br/> C,0,-2.1090463506,-3.5117276744,2.077131337<br/> H,0,-2.9033343254,-3.9764975279,2.634671495<br/> C,0,-1.1595712886,-4.1595068422,1.3212429064<br/> N,0,-0.3524236423,-3.1883378927,0.8080209898<br/> H,0,0.4599379622,-3.2733221466,0.2219959913<br/> C,0,-0.9326680097,-5.6163625404,1.0272431331<br/> C,0,-1.9925506208,-6.4489669419,1.742191975<br/> H,0,-1.9470848724,-6.3086933913,2.8228223964<br/> H,0,-1.8389694692,-7.5088356394,1.5367930356<br/> H,0,-2.9972951187,-6.1867946238,1.4084674069<br/> C,0,-1.0310254683,-5.8622498992,-0.4829354503</p> | <p>Co,0,0.4709668385,-0.2788528607,0.9983682526<br/> P,0,0.2080305725,2.1016261426,0.7310542125<br/> N,0,-1.3255033856,0.0455381131,2.1750156005<br/> C,0,-3.7740853118,0.4246876674,3.4122513497<br/> C,0,-2.1351573664,-1.0078213713,2.4306581082<br/> C,0,-1.7013046563,1.2765130328,2.5659443445<br/> C,0,-2.9279651023,1.4990649557,3.1784889965<br/> C,0,-3.3707881791,-0.8464475417,3.0489226405<br/> H,0,-3.208369436,2.5050421888,3.4629735721<br/> H,0,-3.9993884643,-1.7076106306,3.232480342<br/> H,0,-4.7362588919,0.5790092901,3.8842108585<br/> C,0,-0.7170995133,2.3766017241,2.3308068057<br/> H,0,0.0514750728,2.2992750856,3.1040412413<br/> H,0,-1.185246972,3.3569991845,2.4386265938<br/> C,0,-1.035655256,2.704483293,-0.5822489255<br/> C,0,1.6855454779,3.2891201437,0.8663140992<br/> C,0,2.6887296814,2.8438801363,-0.2013762384<br/> H,0,3.6112118143,3.4221851066,-0.1018314728<br/> H,0,2.3174642916,2.990707472,-1.214500596<br/> H,0,2.934443951,1.7871600074,-0.0846354197<br/> C,0,2.3295292413,3.0473708367,2.233793198<br/> H,0,3.3252435572,3.4977032805,2.2442545895<br/> H,0,2.4384742131,1.9799792474,2.4410567706<br/> H,0,1.762863458,3.5083124439,3.0441391179<br/> C,0,1.3677831666,4.7709084469,0.7172006256<br/> H,0,2.2748812974,5.3598573352,0.8836680727<br/> H,0,0.6272371424,5.1077416779,-1.4454305162<br/> H,0,1.0030721028,5.0227704464,-0.2787102959<br/> C,0,-0.2905699534,2.8939635363,-1.9015166735<br/> H,0,0.3717035537,3.759918083,-1.8866433228<br/> H,0,-1.010303583,3.0504656713,-2.7095295891<br/> H,0,0.3016915735,2.0117921409,-2.1528549895<br/> C,0,-2.0278925088,1.5497244004,-0.7661133568<br/> H,0,-1.5133444608,0.6100054382,-0.9796602777<br/> H,0,-2.6949262178,1.7750214966,-1.6030793541<br/> H,0,-2.6552234355,1.4009828488,0.1143850012<br/> C,0,-1.8150329572,3.9640294281,-0.2230947667<br/> H,0,-1.1769032966,4.8314092719,-0.0636082137<br/> H,0,-2.4232637317,3.8220575117,0.6723271873<br/> H,0,-2.505232033,4.2120345649,-1.0350542763<br/> H,0,0.6006047978,-0.7808385513,-0.5508486566<br/> H,0,1.8086488133,-0.2488818298,1.9165933815<br/> C,0,-1.6114702056,-2.2884840841,2.0032458529<br/> N,0,-0.3728819205,-2.2906024048,1.5019296737<br/> C,0,-2.1575698576,-3.5879027887,1.9897732408<br/> H,0,-3.1307456974,-3.9032685388,2.3242952601<br/> C,0,-1.1831859329,-4.3922699419,1.4417418577<br/> N,0,-0.1385878276,-3.5615888861,1.1715852647<br/> H,0,0.7407940042,-3.7772512879,0.7303650036<br/> C,0,-1.1391553587,-5.8647814663,1.1403857802<br/> C,0,-2.4436964691,-6.5132978819,1.5942624528<br/> H,0,-2.5992523319,-6.3885075324,2.6666267496<br/> H,0,-2.4248390812,-7.5827853665,1.3825470958<br/> H,0,-3.3027808763,-6.0868559472,1.0748374876<br/> C,0,-0.9651983082,-6.0781381129,-0.3678493951</p> |

|                                                                                                                                                                                                                                                                                                                                                                                                                                                                                                                                                                                                                                                                                                                                                                                                                                                                                                                                                                                                                                                                                                                                                                                                                                                                                                                                                                                                                                                                                                                                                                                                                                                                                                                                                                                                                                                                                                                                                                                                                                                                                                                                                                                                                                                                                                                                                                                                                                                                                                                                                                                                                                                                                                                |                                                                                                                                                                                                                                                                                                                                                                                                                                                                                                                                                                                                                                                                                                                                                                                                                                                                                                                                                                                                                                                                                                                                                                                                                                                                                                                                                                                                                                                                                                                                                                                                                                                                                                                                                                                                                                                                                                                                                                                                                                                                                                                                                                                                                                                                                                                                                                                                                                                                                                                                                                                                                                                                                                    |
|----------------------------------------------------------------------------------------------------------------------------------------------------------------------------------------------------------------------------------------------------------------------------------------------------------------------------------------------------------------------------------------------------------------------------------------------------------------------------------------------------------------------------------------------------------------------------------------------------------------------------------------------------------------------------------------------------------------------------------------------------------------------------------------------------------------------------------------------------------------------------------------------------------------------------------------------------------------------------------------------------------------------------------------------------------------------------------------------------------------------------------------------------------------------------------------------------------------------------------------------------------------------------------------------------------------------------------------------------------------------------------------------------------------------------------------------------------------------------------------------------------------------------------------------------------------------------------------------------------------------------------------------------------------------------------------------------------------------------------------------------------------------------------------------------------------------------------------------------------------------------------------------------------------------------------------------------------------------------------------------------------------------------------------------------------------------------------------------------------------------------------------------------------------------------------------------------------------------------------------------------------------------------------------------------------------------------------------------------------------------------------------------------------------------------------------------------------------------------------------------------------------------------------------------------------------------------------------------------------------------------------------------------------------------------------------------------------------|----------------------------------------------------------------------------------------------------------------------------------------------------------------------------------------------------------------------------------------------------------------------------------------------------------------------------------------------------------------------------------------------------------------------------------------------------------------------------------------------------------------------------------------------------------------------------------------------------------------------------------------------------------------------------------------------------------------------------------------------------------------------------------------------------------------------------------------------------------------------------------------------------------------------------------------------------------------------------------------------------------------------------------------------------------------------------------------------------------------------------------------------------------------------------------------------------------------------------------------------------------------------------------------------------------------------------------------------------------------------------------------------------------------------------------------------------------------------------------------------------------------------------------------------------------------------------------------------------------------------------------------------------------------------------------------------------------------------------------------------------------------------------------------------------------------------------------------------------------------------------------------------------------------------------------------------------------------------------------------------------------------------------------------------------------------------------------------------------------------------------------------------------------------------------------------------------------------------------------------------------------------------------------------------------------------------------------------------------------------------------------------------------------------------------------------------------------------------------------------------------------------------------------------------------------------------------------------------------------------------------------------------------------------------------------------------------|
| <p>H,0,-0.273054466,-5.3052195889,-1.0359274622<br/> H,0,-2.0071545069,-5.5666032951,-0.8682357429<br/> H,0,-0.8852256401,-6.920651797,-0.7051792412<br/> C,0,0.4570541807,-6.0350835408,1.5211181962<br/> H,0,0.5632182641,-5.8643301229,2.5925499665<br/> H,0,1.2519136339,-5.4829292983,1.0172744819<br/> H,0,0.6239684249,-7.0960770631,1.3281066431</p>                                                                                                                                                                                                                                                                                                                                                                                                                                                                                                                                                                                                                                                                                                                                                                                                                                                                                                                                                                                                                                                                                                                                                                                                                                                                                                                                                                                                                                                                                                                                                                                                                                                                                                                                                                                                                                                                                                                                                                                                                                                                                                                                                                                                                                                                                                                                                   | <p>H,0,-0.0316319032,-5.6491747756,-0.7348626015<br/> H,0,-1.7815941196,-5.6224087938,-0.9283318792<br/> H,0,-0.9484841913,-7.1443350855,-0.5992141995<br/> C,0,0.033869191,-6.5116279085,1.8856840666<br/> H,0,-0.0531031212,-6.3668904408,2.9627395623<br/> H,0,0.9938577252,-6.0991504019,1.5715828024<br/> H,0,0.0607460775,-7.5844968198,1.6891115714</p>                                                                                                                                                                                                                                                                                                                                                                                                                                                                                                                                                                                                                                                                                                                                                                                                                                                                                                                                                                                                                                                                                                                                                                                                                                                                                                                                                                                                                                                                                                                                                                                                                                                                                                                                                                                                                                                                                                                                                                                                                                                                                                                                                                                                                                                                                                                                     |
| 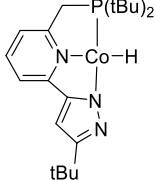 <p><b>PNNCoH-Double</b></p>                                                                                                                                                                                                                                                                                                                                                                                                                                                                                                                                                                                                                                                                                                                                                                                                                                                                                                                                                                                                                                                                                                                                                                                                                                                                                                                                                                                                                                                                                                                                                                                                                                                                                                                                                                                                                                                                                                                                                                                                                                                                                                                                                                                                                                                                                                                                                                                                                                                                                                                                                                                                  |  <p><b>PNNCo-H_Quartet</b></p>                                                                                                                                                                                                                                                                                                                                                                                                                                                                                                                                                                                                                                                                                                                                                                                                                                                                                                                                                                                                                                                                                                                                                                                                                                                                                                                                                                                                                                                                                                                                                                                                                                                                                                                                                                                                                                                                                                                                                                                                                                                                                                                                                                                                                                                                                                                                                                                                                                                                                                                                                                                    |
| <p>Co,0,-0.1657343646,-0.155707932,0.9208898752<br/> P,0,-0.0234900662,2.0065312948,0.7784857773<br/> N,0,-1.607341572,0.1979486711,2.245962338<br/> C,0,-3.8115603115,0.485116567,3.8632311182<br/> C,0,-2.3135258388,-0.9085146941,2.6198057043<br/> C,0,-1.9718982456,1.4230621541,2.6594225832<br/> C,0,-3.0832378426,1.603694601,3.4689367915<br/> C,0,-3.4295252335,-0.7742746137,3.4475767642<br/> H,0,-3.3647277345,2.5973889398,3.7902321317<br/> H,0,-3.9868597453,-1.6541774692,3.7384967809<br/> H,0,-4.6811735616,0.6044528434,4.4976251761<br/> C,0,-1.0805332133,2.5514381439,2.2259798987<br/> H,0,-0.4022310026,2.7935289246,3.0471649565<br/> H,0,-1.6517266601,3.4604583056,2.0333974676<br/> C,0,-1.0036883193,2.5955816268,-0.7374538051<br/> C,0,1.6207810524,2.9175079512,0.9875617054<br/> C,0,2.6177132414,2.3506554296,-0.0247738153<br/> H,0,3.6129838166,2.7452947454,0.1926149233<br/> H,0,2.3767775622,2.6228041444,-1.049767232<br/> H,0,2.658588376,1.2623824233,0.0303732252<br/> C,0,2.135049386,2.5654962176,2.3860103535<br/> H,0,3.1715467391,2.8960625181,2.4796042084<br/> H,0,2.1179385176,1.4879770802,2.5634384318<br/> H,0,1.5729587755,3.0533760094,3.1822449785<br/> C,0,1.5103524033,4.4297058193,0.8411103741<br/> H,0,2.4678918675,4.8961218413,1.0869623544<br/> H,0,0.7597000156,4.8592500368,1.5077656905<br/> H,0,1.265542541,4.7226304735,-0.1802536559<br/> C,0,-0.1153568962,2.5193217968,-1.9754135893<br/> H,0,0.6220484472,3.3224247828,-1.9990615025<br/> H,0,-0.7319353769,2.6210375087,-2.8717385273<br/> H,0,0.4088049986,1.5640867542,-2.0364502807<br/> C,0,-2.1311923012,1.5666701187,-0.8756641407<br/> H,0,-1.7353877959,0.5572130653,-1.022216133<br/> H,0,-2.7473371822,1.8092332889,-1.7451945505<br/> H,0,-2.7868808407,1.5507387531,-0.0026371918<br/> C,0,-1.6131250061,3.9879734487,-0.6170545574<br/> H,0,-0.8698788231,4.7656130453,-0.4489333164<br/> H,0,-2.3544165719,4.0482403081,0.1801683493<br/> H,0,-2.1333431651,4.2324554678,-1.5467227526<br/> H,0,0.8883460968,-0.4438443047,-0.1268081083<br/> C,0,-1.7921573034,-2.1175305041,2.0649695906<br/> N,0,-0.7168942686,-1.9830400195,1.2273320819<br/> C,0,-2.104443694,-3.4718982419,2.1598975258<br/> H,0,-2.8917789052,-3.9308432117,2.7354119033<br/> C,0,-1.1616205061,-4.0917874307,1.3425229085<br/> N,0,-0.3348378075,-3.1783106436,0.7844803744<br/> C,0,-0.9700418379,-5.5548652076,1.0316210022<br/> C,0,-2.0069554594,-6.3957249418,1.7693297486<br/> H,0,-1.9255000842,-6.2727731251,2.8511282422<br/> H,0,-1.8687230216,-7.4549648297,1.5453212133<br/> H,0,-3.0234154047,-6.1255230155,1.4763003799<br/> C,0,-1.1155027334,-5.7725938347,-0.4772557899</p> | <p>Co,0,0.5008669543,-0.3432509909,1.6252279277<br/> P,0,0.2039801834,1.9408882452,0.8802226109<br/> N,0,-1.3281257234,0.1656650437,2.5197293252<br/> C,0,-3.840925064,0.6420330306,3.4968200547<br/> C,0,-2.192629519,-0.8681176619,2.640787024<br/> C,0,-1.7001015722,1.4197821218,2.7935798999<br/> C,0,-2.9604708056,1.7032554601,3.2953130064<br/> C,0,-3.4711516259,-0.6454771159,3.1612902939<br/> H,0,-3.2476305556,2.7229199033,3.5158474478<br/> H,0,-4.1621047684,-1.4710185445,3.265798432<br/> H,0,-4.8306697332,0.8323386008,3.893421062<br/> C,0,-0.6561917216,2.4419302714,2.4666520587<br/> H,0,0.1234594236,2.4070128735,3.2315474379<br/> H,0,-1.0570560684,3.4564567878,2.4472646117<br/> C,0,-1.0795771284,2.2923984204,-0.4815319798<br/> C,0,1.690601211,3.1125615423,0.774951408<br/> C,0,2.6675169557,2.5188700288,-0.2416949759<br/> H,0,3.5747653874,3.1268768778,-0.2714584814<br/> H,0,2.2621409955,2.4876320907,-1.2517047668<br/> H,0,2.9544103118,1.5049195048,0.0404256171<br/> C,0,2.3735413883,3.1000886015,2.1454925799<br/> H,0,3.3592241312,3.5614464553,2.0525804989<br/> H,0,2.5107745704,2.0844420467,2.5223597078<br/> H,0,1.8185140716,3.6759030784,2.8863850516<br/> C,0,1.341044504,4.5504184734,0.4095879973<br/> H,0,2.2449454941,5.1636420019,0.454558283<br/> H,0,0.6218528157,4.9875747385,1.1044074914<br/> H,0,0.9406592148,4.6454720936,-0.5992044506<br/> C,0,-0.3661910994,2.3314519115,-1.8312459749<br/> H,0,0.2818678435,3.2001700511,-1.9414833371<br/> H,0,-1.1098558168,2.3786081879,-2.630192808<br/> H,0,0.2333670429,1.4346411398,-1.9978239777<br/> C,0,-2.050009812,1.1049912334,-0.4952320337<br/> H,0,-1.5328406018,0.146318143,-0.5724030569<br/> H,0,-2.7106357115,1.1971615027,-1.3609359475<br/> H,0,-2.68209525,1.0745922216,0.3914299008<br/> C,0,-1.8784426335,3.5724165588,-0.2610798864<br/> H,0,-1.2564831618,4.4653991846,-0.2334994853<br/> H,0,-2.4585076377,3.5309315859,0.6621208997<br/> H,0,-2.5931946315,3.6978956065,-1.0787227204<br/> H,0,1.8102829403,-0.0770945723,2.508987463<br/> C,0,-1.6824534367,-2.1010101005,2.1088729345<br/> N,0,-0.4862334248,-2.0406327129,1.442616004<br/> C,0,-2.1598448949,-3.4033358299,2.0261234288<br/> H,0,-3.0740058021,-3.7996670474,2.4370382106<br/> C,0,-1.1796183109,-4.0813237551,1.2960657162<br/> N,0,-0.1804116401,-3.24622038,0.9511294151<br/> C,0,-1.1199082021,-5.5311830839,0.8847509888<br/> C,0,-2.3593439387,-6.2742426965,1.3734922113<br/> H,0,-2.4417903679,-6.2430211137,2.4616148762<br/> H,0,-2.3170425464,-7.3232027036,1.0752506177<br/> H,0,-3.2731233632,-5.8477869745,0.9549338287<br/> C,0,-1.040969758,-5.6195009008,-0.6419757164</p> |



|                                                                                                                                                                                                                                                                                                                                                                                                                                                                                                                                                                                                                                                                                                                                                                                                                                                                                                                                                                                                                                                                                                                                                                                                                                                                                                                                                                                                                                                                                                                                                                                                                                                                                                                                                                                                                                                                                                                                                                                                                                                                                                                                                                                                                                                                                                                                                                                                                                                                                                                                                                                                                                                                                                               |                                                                                                                                                                                                                                                                                                                                                                                                                                                                                                                                                                                                                                                                                                                                                                                                                                                                                                                                                                                                                                                                                                                                                                                                                                                                                                                                                                                                                                                                                                                                                                                                                                                                                                                                                                                                                                                                                                                                                                                                                                                                                                                                                                                                                                                                                                                                                                                                                                                                                                                                                                                                                                                                                                         |
|---------------------------------------------------------------------------------------------------------------------------------------------------------------------------------------------------------------------------------------------------------------------------------------------------------------------------------------------------------------------------------------------------------------------------------------------------------------------------------------------------------------------------------------------------------------------------------------------------------------------------------------------------------------------------------------------------------------------------------------------------------------------------------------------------------------------------------------------------------------------------------------------------------------------------------------------------------------------------------------------------------------------------------------------------------------------------------------------------------------------------------------------------------------------------------------------------------------------------------------------------------------------------------------------------------------------------------------------------------------------------------------------------------------------------------------------------------------------------------------------------------------------------------------------------------------------------------------------------------------------------------------------------------------------------------------------------------------------------------------------------------------------------------------------------------------------------------------------------------------------------------------------------------------------------------------------------------------------------------------------------------------------------------------------------------------------------------------------------------------------------------------------------------------------------------------------------------------------------------------------------------------------------------------------------------------------------------------------------------------------------------------------------------------------------------------------------------------------------------------------------------------------------------------------------------------------------------------------------------------------------------------------------------------------------------------------------------------|---------------------------------------------------------------------------------------------------------------------------------------------------------------------------------------------------------------------------------------------------------------------------------------------------------------------------------------------------------------------------------------------------------------------------------------------------------------------------------------------------------------------------------------------------------------------------------------------------------------------------------------------------------------------------------------------------------------------------------------------------------------------------------------------------------------------------------------------------------------------------------------------------------------------------------------------------------------------------------------------------------------------------------------------------------------------------------------------------------------------------------------------------------------------------------------------------------------------------------------------------------------------------------------------------------------------------------------------------------------------------------------------------------------------------------------------------------------------------------------------------------------------------------------------------------------------------------------------------------------------------------------------------------------------------------------------------------------------------------------------------------------------------------------------------------------------------------------------------------------------------------------------------------------------------------------------------------------------------------------------------------------------------------------------------------------------------------------------------------------------------------------------------------------------------------------------------------------------------------------------------------------------------------------------------------------------------------------------------------------------------------------------------------------------------------------------------------------------------------------------------------------------------------------------------------------------------------------------------------------------------------------------------------------------------------------------------------|
| <p>H,0,-0.3927052444,-5.1665015313,-1.0225419158<br/> H,0,-2.113010727,-5.4925859367,-0.820424359<br/> H,0,-0.9522381644,-6.8220404546,-0.7340983447<br/> C,0,0.4354392072,-5.9820641297,1.4645630443<br/> H,0,0.5707972897,-5.8558153552,2.5401534225<br/> H,0,1.1905478504,-5.3798258902,0.9603496702<br/> H,0,0.6117776486,-7.0330437832,1.2230915028</p>                                                                                                                                                                                                                                                                                                                                                                                                                                                                                                                                                                                                                                                                                                                                                                                                                                                                                                                                                                                                                                                                                                                                                                                                                                                                                                                                                                                                                                                                                                                                                                                                                                                                                                                                                                                                                                                                                                                                                                                                                                                                                                                                                                                                                                                                                                                                                  | <p>H,0,-0.1683716187,-5.0822119083,-1.0121650705<br/> H,0,-1.9258039691,-5.1821603625,-1.1078458566<br/> H,0,-0.9692446622,-6.6606439319,-0.9652157861<br/> C,0,0.1320528629,-6.1739695503,1.4885732261<br/> H,0,0.1042592318,-6.1412424336,2.5789412292<br/> H,0,1.0284794496,-5.6475958664,1.1623394385<br/> H,0,0.2141025938,-7.2199713815,1.183957095</p>                                                                                                                                                                                                                                                                                                                                                                                                                                                                                                                                                                                                                                                                                                                                                                                                                                                                                                                                                                                                                                                                                                                                                                                                                                                                                                                                                                                                                                                                                                                                                                                                                                                                                                                                                                                                                                                                                                                                                                                                                                                                                                                                                                                                                                                                                                                                           |
| 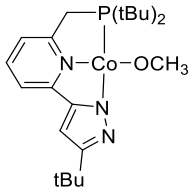 <p><b>PNNCoOMe-Double</b></p>                                                                                                                                                                                                                                                                                                                                                                                                                                                                                                                                                                                                                                                                                                                                                                                                                                                                                                                                                                                                                                                                                                                                                                                                                                                                                                                                                                                                                                                                                                                                                                                                                                                                                                                                                                                                                                                                                                                                                                                                                                                                                                                                                                                                                                                                                                                                                                                                                                                                                                                                                                                               |  <p><b>PNNCoOMe-Quartet</b></p>                                                                                                                                                                                                                                                                                                                                                                                                                                                                                                                                                                                                                                                                                                                                                                                                                                                                                                                                                                                                                                                                                                                                                                                                                                                                                                                                                                                                                                                                                                                                                                                                                                                                                                                                                                                                                                                                                                                                                                                                                                                                                                                                                                                                                                                                                                                                                                                                                                                                                                                                                                                       |
| <p>Co,0,-0.0794550639,-0.1389719243,1.066125806<br/> P,0,-0.0586200476,2.0690068962,0.8058812245<br/> N,0,-1.6309078752,0.2123739137,2.2259599894<br/> C,0,-3.9574853856,0.4881356208,3.6862425527<br/> C,0,-2.3479019327,-0.8974274491,2.5792777396<br/> C,0,-2.0524121792,1.4387767567,2.5942301839<br/> C,0,-3.2185741339,1.6094305447,3.3207727707<br/> C,0,-3.5216828351,-0.7685386308,3.3220842787<br/> H,0,-3.5359647766,2.6054517579,3.5986546571<br/> H,0,-4.0776915537,-1.6562989868,3.5904752055<br/> H,0,-4.8715756327,0.6032425156,4.2550097556<br/> C,0,-1.1678866387,2.5851134563,2.20330606<br/> H,0,-0.5086754781,2.8254458615,3.0435548371<br/> H,0,-1.7453673424,3.4900313636,2.0009981122<br/> C,0,-0.9635339152,2.593040055,-0.7676976071<br/> C,0,1.5462461809,3.0082135298,1.0956135889<br/> C,0,2.4127010796,2.9057924548,-0.1572335299<br/> H,0,3.4167891836,3.2727744538,0.068798482<br/> H,0,2.0243730739,3.5148519729,-0.9747108295<br/> H,0,2.4924319577,1.8683647403,-0.4877635979<br/> C,0,2.2406172074,2.251479488,2.2313991816<br/> H,0,3.1875255423,2.7428789839,2.4680350315<br/> H,0,2.4453867822,1.2208644578,1.9380157915<br/> H,0,1.6455449882,2.2390938898,3.1478912422<br/> C,0,1.3417926579,4.4653146962,1.4977772714<br/> H,0,2.3151127038,4.9225799623,1.6933233909<br/> H,0,0.7552361196,4.5657155627,2.4123663142<br/> H,0,0.858004913,5.0549440745,0.7209857844<br/> C,0,-0.2997894064,1.8938585613,-1.9550013978<br/> H,0,0.6968501823,2.278090236,-2.161988654<br/> H,0,-0.9070467156,2.0467611127,-2.8504120819<br/> H,0,-0.2024985885,0.8204798333,-1.7825445532<br/> C,0,-2.3878899124,2.0494202642,-0.6267395249<br/> H,0,-2.3947919781,0.9734764519,-0.4359447616<br/> H,0,-2.9321157368,2.2206701985,-1.5579966481<br/> H,0,-2.9486537404,2.5365715553,0.172587656<br/> C,0,-1.0105414434,4.0989585628,-0.9883214637<br/> H,0,-0.0241055816,4.5122183978,-1.1988668632<br/> H,0,-1.4280357961,4.6332332722,-0.132247964<br/> H,0,-1.6443391393,4.3243590019,-1.8500371621<br/> O,0,1.5135193637,-0.2874339596,0.1442573936<br/> C,0,-1.7720567199,-2.1106920362,2.1002776283<br/> N,0,-0.6229758467,-1.9803431037,1.3711453252<br/> C,0,-2.0905334607,-3.4650986113,2.1773185541<br/> H,0,-2.9296231426,-3.9199712976,2.6777574442<br/> C,0,-1.0741231341,-4.0893835816,1.4587055816<br/> N,0,-0.1998152056,-3.1771592589,0.9770033545<br/> C,0,-0.8483481796,-5.5523592321,1.1726064965<br/> C,0,-1.9451554557,-6.3947624563,1.8157608553<br/> H,0,-1.9638388134,-6.2669534067,2.8998326558<br/> H,0,-1.7823770331,-7.4541586275,1.6103017141<br/> H,0,-2.9314384049,-6.1305590966,1.4292023548<br/> C,0,-0.8536769015,-5.775148027,-0.3426249257</p> | <p>Co,0,0.5576249292,-0.4415186323,1.4711885838<br/> P,0,0.2734374541,1.8471647337,0.8295923609<br/> N,0,-1.2045336561,0.0597944269,2.5011506469<br/> C,0,-3.6539188411,0.5475711365,3.6211178921<br/> C,0,-2.0788531409,-0.9634724093,2.6379485986<br/> C,0,-1.5405489769,1.3122766627,2.8255451876<br/> C,0,-2.7685446892,1.601112175,3.3993084116<br/> C,0,-3.3240521836,-0.7359329836,3.2330849617<br/> H,0,-3.0280376272,2.6187819264,3.6599539939<br/> H,0,-4.0221328209,-1.5533526817,3.3532636768<br/> H,0,-4.6178177334,0.7420837122,4.0751965437<br/> C,0,-0.5006073903,2.3300221011,2.4665518368<br/> H,0,0.3154031522,2.2788621966,3.1918386784<br/> H,0,-0.8932521026,3.3478233188,2.4847698375<br/> C,0,-1.0740856827,2.2372292534,-0.4553339566<br/> C,0,1.7700696911,2.9984920361,0.6679627636<br/> C,0,2.6654632374,2.4453911184,-0.4424869037<br/> H,0,3.580199543,3.0401691121,-0.4975399047<br/> H,0,2.1972524817,2.4763998552,-1.4243996719<br/> H,0,2.9536658425,1.4138144052,-0.2351824631<br/> C,0,2.5507476065,2.9006303591,1.9819021868<br/> H,0,3.5239937073,3.3779996325,1.8471254247<br/> H,0,2.7197036525,1.8615590781,2.271076546<br/> H,0,2.0514390042,3.4203820718,2.8001137467<br/> C,0,1.4159384828,4.4560201886,0.3991385915<br/> H,0,2.3286074981,5.0576197439,0.4103821492<br/> H,0,0.7523660536,4.8654069832,1.1629134376<br/> H,0,0.9476033561,4.6044021368,-0.5736082487<br/> C,0,-0.4335735459,2.3188399659,-1.8390694035<br/> H,0,0.203176161,3.1948816783,-1.956932157<br/> H,0,-1.2195006699,2.3856119316,-2.5949033928<br/> H,0,0.1600092596,1.4311143226,-2.0647487131<br/> C,0,-2.0492387182,1.0536354087,-0.454992036<br/> H,0,-1.5406536745,0.0953642071,-0.5808825421<br/> H,0,-2.7494196956,1.1706822076,-1.2858199823<br/> H,0,-2.6390781431,1.0023790812,0.4593079152<br/> C,0,-1.8546180422,3.5125072505,-0.1548854055<br/> H,0,-1.2255127798,4.4004878117,-0.1209431746<br/> H,0,-2.3958422896,3.4402872033,0.7897533246<br/> H,0,-2.6020160962,3.6715850251,-0.9364720765<br/> O,0,2.015928516,-0.3357361245,2.5867511089<br/> C,0,-1.6195130394,-2.1871415076,2.042930473<br/> N,0,-0.458340615,-2.1282652256,1.316549482<br/> C,0,-2.124265016,-3.4787580021,1.9509650002<br/> H,0,-3.0219358142,-3.8710584972,2.4002891741<br/> C,0,-1.1968284677,-4.1520584285,1.1519783156<br/> N,0,-0.2008260437,-3.3246091952,0.7784682285<br/> C,0,-1.1857589218,-5.5899141409,0.6964954759<br/> C,0,-2.4032965769,-6.3303551594,1.2408128554<br/> H,0,-2.418048329,-6.328240318,2.3324023254<br/> H,0,-2.3945037222,-7.371073521,0.9123460257<br/> H,0,-3.3349734432,-5.881009016,0.8913338682<br/> C,0,-1.2042127656,-5.6334380932,-0.8342016517</p> |

|                                                                                                                                                                                                                                                                                                                                                                                                                                                                                                                                                                                                                                                                                                                                                                                                                                                                                                                                                                                                                                                                                                                                                                                                                                                                                                                                                                                                                                                                                                                                                                                                                                                                                                                                                                                                                                                                                                                                                                                                                                                                                                                                                                                                                                                                                                                                                                                                                                                                                                          |                                                                                                                                                                                                                                                                                                                                                                                                                                                                                                                                                                                                                                                                                                                                                                                                                                                                                                                                                                                                                                                                                                                                                                                                                                                                                                                                                                                                                                                                                                                                                                                                                                                                                                                                                                                                                                                                                                                                                                                                                                                                                                                                                                                                                                                                                                                                                                                                                                                                                                           |
|----------------------------------------------------------------------------------------------------------------------------------------------------------------------------------------------------------------------------------------------------------------------------------------------------------------------------------------------------------------------------------------------------------------------------------------------------------------------------------------------------------------------------------------------------------------------------------------------------------------------------------------------------------------------------------------------------------------------------------------------------------------------------------------------------------------------------------------------------------------------------------------------------------------------------------------------------------------------------------------------------------------------------------------------------------------------------------------------------------------------------------------------------------------------------------------------------------------------------------------------------------------------------------------------------------------------------------------------------------------------------------------------------------------------------------------------------------------------------------------------------------------------------------------------------------------------------------------------------------------------------------------------------------------------------------------------------------------------------------------------------------------------------------------------------------------------------------------------------------------------------------------------------------------------------------------------------------------------------------------------------------------------------------------------------------------------------------------------------------------------------------------------------------------------------------------------------------------------------------------------------------------------------------------------------------------------------------------------------------------------------------------------------------------------------------------------------------------------------------------------------------|-----------------------------------------------------------------------------------------------------------------------------------------------------------------------------------------------------------------------------------------------------------------------------------------------------------------------------------------------------------------------------------------------------------------------------------------------------------------------------------------------------------------------------------------------------------------------------------------------------------------------------------------------------------------------------------------------------------------------------------------------------------------------------------------------------------------------------------------------------------------------------------------------------------------------------------------------------------------------------------------------------------------------------------------------------------------------------------------------------------------------------------------------------------------------------------------------------------------------------------------------------------------------------------------------------------------------------------------------------------------------------------------------------------------------------------------------------------------------------------------------------------------------------------------------------------------------------------------------------------------------------------------------------------------------------------------------------------------------------------------------------------------------------------------------------------------------------------------------------------------------------------------------------------------------------------------------------------------------------------------------------------------------------------------------------------------------------------------------------------------------------------------------------------------------------------------------------------------------------------------------------------------------------------------------------------------------------------------------------------------------------------------------------------------------------------------------------------------------------------------------------------|
| <p>H,0,-0.0852965905,-5.1684262843,-0.8215301294<br/> H,0,-1.8161325684,-5.5001829821,-0.7775876509<br/> H,0,-0.6634467335,-6.8245445599,-0.5796913619<br/> C,0,0.5138048114,-5.9706911614,1.7338882359<br/> H,0,0.5509355713,-5.8380435387,2.8164580686<br/> H,0,1.3098909233,-5.3683628701,1.296606655<br/> H,0,0.715399326,-7.021963837,1.515206851<br/> C,0,2.010228067,-1.5117006864,-0.3005835915<br/> H,0,2.9760626576,-1.3384309419,-0.7947616462<br/> H,0,2.1660358177,-2.2402303353,0.5047901695<br/> H,0,1.3492180089,-2.0017230736,-1.0297515011</p>                                                                                                                                                                                                                                                                                                                                                                                                                                                                                                                                                                                                                                                                                                                                                                                                                                                                                                                                                                                                                                                                                                                                                                                                                                                                                                                                                                                                                                                                                                                                                                                                                                                                                                                                                                                                                                                                                                                                         | <p>H,0,-0.3485006529,-5.0968029077,-1.2428405811<br/> H,0,-2.1098979373,-5.1707780396,-1.230386326<br/> H,0,-1.1684639699,-6.6652465264,-1.1916180576<br/> C,0,0.0916562961,-6.2675300182,1.2006488746<br/> H,0,0.1327155782,-6.2678504921,2.2910925945<br/> H,0,0.9737978434,-5.7434209107,0.8344152779<br/> H,0,0.1383076524,-7.3047364479,0.860496896<br/> C,0,1.9592664801,-0.2458304756,3.9678069662<br/> H,0,2.5100204546,0.6353885627,4.335419236<br/> H,0,0.9316131629,-0.1710948613,4.3595862934<br/> H,0,2.418901518,-1.1231520049,4.4428001484</p>                                                                                                                                                                                                                                                                                                                                                                                                                                                                                                                                                                                                                                                                                                                                                                                                                                                                                                                                                                                                                                                                                                                                                                                                                                                                                                                                                                                                                                                                                                                                                                                                                                                                                                                                                                                                                                                                                                                                             |
| 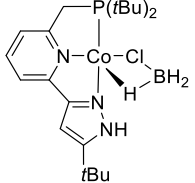 <p><b>PNNCo(c-H-BH<sub>2</sub>-Cl)</b></p>                                                                                                                                                                                                                                                                                                                                                                                                                                                                                                                                                                                                                                                                                                                                                                                                                                                                                                                                                                                                                                                                                                                                                                                                                                                                                                                                                                                                                                                                                                                                                                                                                                                                                                                                                                                                                                                                                                                                                                                                                                                                                                                                                                                                                                                                                                                                                                             |  <p><b>PNNCo(c-H-BHCl-H)</b></p>                                                                                                                                                                                                                                                                                                                                                                                                                                                                                                                                                                                                                                                                                                                                                                                                                                                                                                                                                                                                                                                                                                                                                                                                                                                                                                                                                                                                                                                                                                                                                                                                                                                                                                                                                                                                                                                                                                                                                                                                                                                                                                                                                                                                                                                                                                                                                                                        |
| <p>Co,0,-0.112773966,-0.2509822185,-0.0811699557<br/> P,0,-0.3335902589,0.4501369677,-2.2073597844<br/> N,0,0.7210621369,1.4776976727,0.2328129814<br/> C,0,1.550524472,3.9914095008,0.996561538<br/> C,0,1.0583345892,1.7106688175,1.5397355054<br/> C,0,0.8578488176,2.4454793993,-0.6921302868<br/> C,0,1.2580914311,3.7226121322,-0.3371632167<br/> C,0,1.4695687857,2.9854843697,1.9341415455<br/> H,0,1.3550785003,4.484337506,-1.098530846<br/> H,0,1.7118364601,3.1617997694,2.9729038188<br/> H,0,1.8578530021,4.9864157986,1.2929982375<br/> C,0,0.6536816155,2.0264782038,-2.113048486<br/> H,0,1.637403857,1.8198588785,-2.5433978553<br/> H,0,0.2253063424,2.8263483521,-2.7189809648<br/> C,0,-2.0028788077,0.9987052879,-2.9003647974<br/> C,0,0.6611060677,-0.6137724707,-3.4193338174<br/> C,0,-0.1844285261,-1.7983023883,-3.8788720052<br/> H,0,-0.6683623022,-2.305379296,-3.0430240366<br/> H,0,0.4561617253,-2.5242621717,-4.3848050028<br/> H,0,-0.9524338591,-1.4954843492,-4.5911043634<br/> C,0,1.8390137554,-1.131601191,-2.5875430353<br/> H,0,2.4933779306,-1.7413054369,-3.2149223546<br/> H,0,1.5011112077,-1.7532025291,-1.755466863<br/> H,0,2.4464405747,-0.321283751,-2.1763330319<br/> C,0,1.1979625263,0.1365582101,-4.635328661<br/> H,0,1.7852257904,-0.5545856484,-5.2449793486<br/> H,0,1.8623635447,0.9584983538,-4.367522221<br/> H,0,0.4089200007,0.5345965979,-5.2697267405<br/> C,0,-2.9892044112,-0.1661971856,-2.8434897934<br/> H,0,-2.7245989811,-0.9711400788,-3.5259446017<br/> H,0,-3.9789494836,0.1948406392,-3.1332557548<br/> H,0,-3.0681453935,-0.5817359322,-1.8402152362<br/> C,0,-2.4961766092,2.1035832772,-1.9624387626<br/> H,0,-2.5422305377,1.7620540512,-0.9277742849<br/> H,0,-3.5055765144,2.3960609072,-2.2588279303<br/> H,0,-1.8754163852,2.999918606,-2.003171212<br/> C,0,-1.9077764177,1.5336493774,-4.3242282706<br/> H,0,-1.6868490193,0.7433147067,-5.0417494912<br/> H,0,-1.1556152533,2.3173847243,-4.4360098048<br/> H,0,-2.8692234209,1.9668413457,-4.6108818853<br/> C,0,0.9456483301,0.5557605884,2.3605204148<br/> N,0,0.5407336187,-0.5737061853,1.7098661772<br/> C,0,1.1704635603,0.2233212999,3.6959798686<br/> H,0,1.5055476953,0.8673536079,4.4922180134<br/> C,0,0.8623456341,-1.1334906431,3.7581648671<br/> N,0,0.4759120325,-1.594160178,2.5430009836<br/> C,0,0.8908458836,-2.0810418429,4.9292660714<br/> C,0,1.3426545583,-1.3519041938,6.1904211387<br/> H,0,2.347989257,-0.940964486,6.0776819952</p> | <p>Co,0,-0.552006597,-0.0143938144,0.0985995122<br/> P,0,-0.6296626823,0.6062119285,-2.0682153846<br/> N,0,0.6424833236,1.5566676301,0.2851544764<br/> C,0,2.4274524363,3.6092579938,0.742533162<br/> C,0,1.3128830424,1.6209170717,1.4767368146<br/> C,0,0.8697453464,2.472492667,-0.6718308032<br/> C,0,1.7646493099,3.5120476823,-0.4762067035<br/> C,0,2.2042619403,2.6673044756,1.7225187509<br/> H,0,1.9316859744,4.2313910072,-1.2660841581<br/> H,0,2.7178377826,2.7096989826,2.6728675786<br/> H,0,3.1242989209,4.419552546,0.9167282679<br/> C,0,0.094930321,2.3132491527,-1.9398894243<br/> H,0,0.6956600902,2.5856435725,-2.8111200961<br/> H,0,-0.7530113722,3.0042348814,-1.9292901568<br/> C,0,-2.1644192985,0.9187866499,-3.135878552<br/> C,0,0.685420327,-0.4124779782,-2.9818734918<br/> C,0,0.3080148621,-1.8907820856,-2.8769057235<br/> H,0,0.1906130747,-2.2003728854,-1.8375346357<br/> H,0,1.1015543363,-2.4981895739,-3.3181997421<br/> H,0,-0.616211979,-2.1284567864,-3.400578708<br/> C,0,1.9957142105,-0.1996609853,-2.2183262383<br/> H,0,2.7688157675,-0.8374368652,-2.6522593654<br/> H,0,1.905023137,-0.4701283411,-1.163619023<br/> H,0,2.3545551746,0.8295192437,-2.2736684797<br/> C,0,0.8881936732,-0.0254540298,-4.4407342893<br/> H,0,1.7426888015,-0.5746856038,-4.8440790697<br/> H,0,1.1012117791,1.0376907369,-4.5674844098<br/> H,0,0.0262871104,-0.2781735278,-5.0575493544<br/> C,0,-2.7175733696,-0.4075463976,-3.6490373134<br/> H,0,-2.0699457102,-0.8561730122,-4.4031421385<br/> H,0,-3.6878357287,-0.2347834109,-4.1199839491<br/> H,0,-2.8668083453,-1.1258112919,-2.8425099308<br/> C,0,-3.1982194524,1.5807349371,-2.2216274019<br/> H,0,-3.4943221787,0.9300523621,-1.4028576219<br/> H,0,-4.0878576427,1.8181843062,-2.8093603386<br/> H,0,-2.8362264529,2.5188761319,-1.7960560751<br/> C,0,-1.8921119857,1.8570751766,-4.3115292761<br/> H,0,-1.176911333,1.4579180834,-5.0263081492<br/> H,0,-1.5412482209,2.8381992831,-3.990488279<br/> H,0,-2.829587621,2.0192226198,-4.8490317059<br/> C,0,1.0302441889,0.5272902456,2.3397602808<br/> N,0,0.1690131242,-0.404397937,1.8335229321<br/> C,0,1.4620330778,0.0766791075,3.5862415279<br/> H,0,2.1455762075,0.5603827765,4.2644334425<br/> C,0,0.8057401672,-1.1418042668,3.7481204606<br/> N,0,0.0311030336,-1.4145745866,2.6717965953<br/> C,0,0.8405303927,-2.1186034843,4.8949704489<br/> C,0,1.769566072,-1.6129003209,5.9937736818<br/> H,0,2.7931006714,-1.495225576,5.6318594508</p> |

|                                                                                                                                                                                                                                                                                                                                                                                                                                                                                                                                                                                                                                                                                                                                                                                                                                                                                                                                                                                                                                                                                                                                                                                                                                                                                                                                                                                                                                                                                                                                                                                                                                                                                                                                                                                                                                                                                                                                                                                                                                                                                                                                                                                                                                                                                                           |                                                                                                                                                                                                                                                                                                                                                                                                                                                                                                                                                                                                                                                                                                                                                                                                                                                                                                                                                                                                                                                                                                                                                                                                                                                                                                                                                                                                                                                                                                                                                                                                                                                                                                                                                                                                                                                                                                                                                                                                                                                                                                                                                                                                                                                                                                        |
|-----------------------------------------------------------------------------------------------------------------------------------------------------------------------------------------------------------------------------------------------------------------------------------------------------------------------------------------------------------------------------------------------------------------------------------------------------------------------------------------------------------------------------------------------------------------------------------------------------------------------------------------------------------------------------------------------------------------------------------------------------------------------------------------------------------------------------------------------------------------------------------------------------------------------------------------------------------------------------------------------------------------------------------------------------------------------------------------------------------------------------------------------------------------------------------------------------------------------------------------------------------------------------------------------------------------------------------------------------------------------------------------------------------------------------------------------------------------------------------------------------------------------------------------------------------------------------------------------------------------------------------------------------------------------------------------------------------------------------------------------------------------------------------------------------------------------------------------------------------------------------------------------------------------------------------------------------------------------------------------------------------------------------------------------------------------------------------------------------------------------------------------------------------------------------------------------------------------------------------------------------------------------------------------------------------|--------------------------------------------------------------------------------------------------------------------------------------------------------------------------------------------------------------------------------------------------------------------------------------------------------------------------------------------------------------------------------------------------------------------------------------------------------------------------------------------------------------------------------------------------------------------------------------------------------------------------------------------------------------------------------------------------------------------------------------------------------------------------------------------------------------------------------------------------------------------------------------------------------------------------------------------------------------------------------------------------------------------------------------------------------------------------------------------------------------------------------------------------------------------------------------------------------------------------------------------------------------------------------------------------------------------------------------------------------------------------------------------------------------------------------------------------------------------------------------------------------------------------------------------------------------------------------------------------------------------------------------------------------------------------------------------------------------------------------------------------------------------------------------------------------------------------------------------------------------------------------------------------------------------------------------------------------------------------------------------------------------------------------------------------------------------------------------------------------------------------------------------------------------------------------------------------------------------------------------------------------------------------------------------------------|
| <p>H,0,1.3584071365,-2.0360787453,7.0404052109<br/> H,0,0.6689988741,-0.5299580767,6.440287348<br/> C,0,-0.5166801377,-2.6482780124,5.1391800725<br/> H,0,-0.8648227443,-3.1543796615,4.2391871864<br/> H,0,-1.2296382003,-1.854806248,5.3691654699<br/> H,0,-0.5251455917,-3.3624812162,5.9658366701<br/> C,0,1.8559312848,-3.2309964585,4.6282076283<br/> H,0,2.8738738295,-2.8642451412,4.4845985767<br/> H,0,1.5569947526,-3.7539884375,3.720314838<br/> H,0,1.8688570517,-3.9486214671,5.4517430377<br/> Cl,0,-1.2215652422,-2.2506072236,-0.2633553214<br/> B,0,-2.3517183224,-0.9162935103,0.709494683<br/> H,0,-3.4167643013,-0.9156541969,0.1686857318<br/> H,0,-1.7882854921,0.1788446367,0.4889268723<br/> H,0,-2.3046264542,-1.2091961596,1.8601433322</p>                                                                                                                                                                                                                                                                                                                                                                                                                                                                                                                                                                                                                                                                                                                                                                                                                                                                                                                                                                                                                                                                                                                                                                                                                                                                                                                                                                                                                                                                                                                                    | <p>H,0,1.7925765192,-2.318006985,6.8262182315<br/> H,0,1.4381592531,-0.649592764,6.386351592<br/> C,0,-0.5774276723,-2.2802811378,5.4515936316<br/> H,0,-1.2602243903,-2.6175699721,4.6722698203<br/> H,0,-0.9578098952,-1.3337643264,5.839051114<br/> H,0,-0.5897938288,-3.008543133,6.2657725623<br/> C,0,1.3368061497,-3.4753953479,4.3873337983<br/> H,0,2.3512740725,-3.4019515199,3.9911377907<br/> H,0,0.691102493,-3.845672676,3.5916725549<br/> H,0,1.3429840877,-4.2095383078,5.1961220197<br/> H,0,-1.3280975179,-1.4535055183,-0.0297101918<br/> B,0,-2.4690620774,-0.8970999169,0.2846169003<br/> H,0,-3.1759292033,-1.0388496105,-0.6700322219<br/> H,0,-2.2527858157,0.3272567493,0.5191541461<br/> Cl,0,-3.1286998289,-1.7347340718,1.7620909114</p>                                                                                                                                                                                                                                                                                                                                                                                                                                                                                                                                                                                                                                                                                                                                                                                                                                                                                                                                                                                                                                                                                                                                                                                                                                                                                                                                                                                                                                                                                                                                   |
| 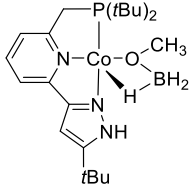 <p><b>PNNCo(c-H-BH<sub>2</sub>-OCH<sub>3</sub>)</b></p>                                                                                                                                                                                                                                                                                                                                                                                                                                                                                                                                                                                                                                                                                                                                                                                                                                                                                                                                                                                                                                                                                                                                                                                                                                                                                                                                                                                                                                                                                                                                                                                                                                                                                                                                                                                                                                                                                                                                                                                                                                                                                                                                                                 |  <p><b>PNNCo(c-H-BH(OCH<sub>3</sub>)-H)</b></p>                                                                                                                                                                                                                                                                                                                                                                                                                                                                                                                                                                                                                                                                                                                                                                                                                                                                                                                                                                                                                                                                                                                                                                                                                                                                                                                                                                                                                                                                                                                                                                                                                                                                                                                                                                                                                                                                                                                                                                                                                                                                                                                                                                      |
| <p>Co,0,-0.5291066277,-0.0864112655,0.0093473637<br/> P,0,-0.5958794922,0.5904269349,-2.1486307722<br/> N,0,0.6070385792,1.4900297839,0.2344993755<br/> C,0,2.4551695215,3.5052753913,0.6185626343<br/> C,0,1.3850493552,1.4927025803,1.3579615326<br/> C,0,0.7394070641,2.4672186926,-0.684334739<br/> C,0,1.6620071748,3.4865499468,-0.5248475023<br/> C,0,2.3149791528,2.5140369563,1.5648061166<br/> H,0,1.7490634305,4.2526094075,-1.2831316013<br/> H,0,2.9228637239,2.498377564,2.458766571<br/> H,0,3.1815331711,4.2953311758,0.7618164321<br/> C,0,-0.1862774142,2.3772973501,-1.8510563094<br/> H,0,0.1950915445,2.913460317,-2.7208759832<br/> H,0,-1.1337720369,2.8462251633,-1.5746477838<br/> C,0,-2.1473353034,0.6263908396,-3.2343451396<br/> C,0,0.9132625361,-0.0914718957,-3.0903848053<br/> C,0,0.5346291813,-1.4217743417,-3.7367414015<br/> H,0,0.0687111869,-2.1007497938,-3.0193225721<br/> H,0,1.4358175625,-1.9099305967,-4.1151321065<br/> H,0,-0.1451047324,-1.2982659146,-4.5790059798<br/> C,0,2.0016373047,-0.3658200391,-2.0464168977<br/> H,0,2.8615610738,-0.8253072032,-2.5402476187<br/> H,0,1.662116916,-1.0542906201,-1.2681562383<br/> H,0,2.3538494381,0.5439916722,-1.5597179161<br/> C,0,1.4780763591,0.8688543552,-4.1322958361<br/> H,0,2.3250673689,0.3961810734,-4.6361161318<br/> H,0,1.8548443271,1.7853966509,-3.6756365108<br/> H,0,0.7563473746,1.1427228082,-4.8991664275<br/> C,0,-2.761314789,-0.7751079321,-3.2520810319<br/> H,0,-2.1259478489,-1.5072482733,-3.7467257007<br/> H,0,-3.704627499,-0.738073276,-3.8022052358<br/> H,0,-2.9691879415,-1.1286671684,-2.2432059055<br/> C,0,-3.143988716,1.5702298314,-2.5553226736<br/> H,0,-3.2599324213,1.3479138505,-1.4939486867<br/> H,0,-4.1219497942,1.4392863612,-3.0230355561<br/> H,0,-2.8715158074,2.6192154894,-2.6758926349<br/> C,0,-1.8891151351,1.1137147569,-4.655712097<br/> H,0,-1.2774231009,0.4200385171,-5.2323617551<br/> H,0,-1.4109447281,2.0949795504,-4.6797174745<br/> H,0,-2.8440566503,1.2078259952,-5.1792158945<br/> C,0,1.1491066518,0.377357362,2.2097425684<br/> N,0,0.2380919633,-0.5266942549,1.7491320768<br/> C,0,1.6112996332,-0.0601416514,3.4507752347<br/> H,0,2.3333881468,0.4152169118,4.0939168627<br/> C,0,0.915586511,-1.2457436371,3.6669821598</p> | <p>Co,0,-0.6086417972,0.1712306839,0.0882516625<br/> P,0,-0.6348075943,0.726522931,-2.0805193556<br/> N,0,0.7384542427,1.6206166318,0.2293468204<br/> C,0,2.7242506367,3.4918053866,0.6136176949<br/> C,0,1.4414517862,1.6297280641,1.4028312909<br/> C,0,1.0309899043,2.4942552602,-0.7481355972<br/> C,0,2.0264440226,3.4452676704,-0.5886493119<br/> C,0,2.4366946813,2.5864548577,1.6121834659<br/> H,0,2.245439188,4.1346677625,-1.3925467951<br/> H,0,2.9781861612,2.5895446425,2.5480018689<br/> H,0,3.5005216707,4.232494941,0.760102376<br/> C,0,0.2190058742,2.3794377299,-1.9997899982<br/> H,0,0.8215485584,2.5937229628,-2.8860685219<br/> H,0,-0.5755205432,3.1314739509,-1.9836745031<br/> C,0,-2.1562035607,1.1172398084,-3.1400678183<br/> C,0,0.5929243736,-0.4049764461,-2.9867204025<br/> C,0,0.1188188767,-1.8508435761,-2.8332683654<br/> H,0,-0.0146431331,-2.1158942006,-1.7833620762<br/> H,0,0.8679210088,-2.523875003,-3.2571111704<br/> H,0,-0.8217407348,-2.0427392855,-3.3467558362<br/> C,0,1.9275350264,-0.2639511047,-2.2491993999<br/> H,0,2.644907805,-0.9704341855,-2.6725696388<br/> H,0,1.8330414879,-0.4918896547,-1.184989869<br/> H,0,2.3593248238,0.7337387175,-2.3446707177<br/> C,0,0.7987104305,-0.0745732457,-4.4590012999<br/> H,0,1.6094039674,-0.6897880767,-4.8578374862<br/> H,0,1.0779509848,0.9684860993,-4.6200033413<br/> H,0,-0.0872708946,-0.2878844788,-5.0564289808<br/> C,0,-2.8133371798,-0.187405699,-3.580995137<br/> H,0,-2.2170658537,-0.7166575917,-4.3251309709<br/> H,0,-3.7809942016,0.0306086606,-4.0386171682<br/> H,0,-2.9921159696,-0.854164948,-2.7357814204<br/> C,0,-3.1264611844,1.8822440918,-2.2367018529<br/> H,0,-3.46224984,1.2773708943,-1.3979789648<br/> H,0,-4.0015344836,2.1705574926,-2.8239216007<br/> H,0,-2.6905228536,2.8005252333,-1.8382610154<br/> C,0,-1.8413105617,1.9880380557,-4.3552677022<br/> H,0,-1.1772710618,1.509042372,-5.0702454922<br/> H,0,-1.4040808553,2.9471735277,-4.0755318876<br/> H,0,-2.7751182425,2.2084451583,-4.8785512009<br/> C,0,1.074822443,0.5745933103,2.2863155945<br/> N,0,0.1167936564,-0.274737124,1.8119856562<br/> C,0,1.4846935782,0.1048319745,3.5338683946<br/> H,0,2.224778717,0.5303679077,4.1914984003<br/> C,0,0.7144050412,-1.0398276244,3.7294194936</p> |

|                                                                                                                                                                                                                                                                                                                                                                                                                                                                                                                                                                                                                                                                                                                                                                                                                                                                                                                                                                                                                                                                                                                                                                              |                                                                                                                                                                                                                                                                                                                                                                                                                                                                                                                                                                                                                                                                                                                                                                                                                                                                                                                                                                                                                                                                                                                                                                                                                                                                                                                                                |
|------------------------------------------------------------------------------------------------------------------------------------------------------------------------------------------------------------------------------------------------------------------------------------------------------------------------------------------------------------------------------------------------------------------------------------------------------------------------------------------------------------------------------------------------------------------------------------------------------------------------------------------------------------------------------------------------------------------------------------------------------------------------------------------------------------------------------------------------------------------------------------------------------------------------------------------------------------------------------------------------------------------------------------------------------------------------------------------------------------------------------------------------------------------------------|------------------------------------------------------------------------------------------------------------------------------------------------------------------------------------------------------------------------------------------------------------------------------------------------------------------------------------------------------------------------------------------------------------------------------------------------------------------------------------------------------------------------------------------------------------------------------------------------------------------------------------------------------------------------------------------------------------------------------------------------------------------------------------------------------------------------------------------------------------------------------------------------------------------------------------------------------------------------------------------------------------------------------------------------------------------------------------------------------------------------------------------------------------------------------------------------------------------------------------------------------------------------------------------------------------------------------------------------|
| <p>N,0,0.091608538,-1.5094528894,2.6250408556<br/> C,0,0.9547905524,-2.1946177387,4.8373728599<br/> C,0,1.9703404148,-1.71884775,5.87120713<br/> H,0,2.976550186,-1.6683042206,5.4505033031<br/> H,0,1.9998806066,-2.404435642,6.7197044056<br/> H,0,1.7160718743,-0.7291139679,6.2551690004<br/> C,0,-0.4357127104,-2.2579945444,5.4769003827<br/> H,0,-1.1804305059,-2.5785390602,4.7485567055<br/> H,0,-0.7400163773,-1.2805299686,5.8542251566<br/> H,0,-0.4441567311,-2.9611217563,6.3129858718<br/> C,0,1.3428386518,-3.5915600047,4.3445002586<br/> H,0,2.3351272963,-3.5881822027,3.8901150845<br/> H,0,0.6338988525,-3.946111958,3.5963277396<br/> H,0,1.353120088,-4.3035514177,5.1729002547<br/> O,0,-1.7647019649,-1.5626659647,-0.2016669797<br/> B,0,-2.7583963735,-0.6384549097,0.4974113076<br/> H,0,-3.7405957014,-0.4824827741,-0.1908060494<br/> H,0,-2.1584577934,0.4921153289,0.5244024583<br/> H,0,-2.9645447733,-0.9819155758,1.6291959802<br/> C,0,-1.5749378343,-2.8613396392,0.3372061135<br/> H,0,-2.5084324159,-3.4199588216,0.2333509417<br/> H,0,-0.7970977363,-3.3635250119,-0.24298301<br/> H,0,-1.2793043574,-2.8225189362,1.3873596206</p> | <p>N,0,-0.1042777078,-1.2534182216,2.6729777379<br/> C,0,0.6640613218,-1.9896496371,4.8984660385<br/> C,0,1.6943374154,-1.5944177744,5.9511180676<br/> H,0,2.7087931936,-1.6202502932,5.5481404658<br/> H,0,1.656710429,-2.2814361034,6.792283124<br/> H,0,1.5099213589,-0.5886616449,6.3335498096<br/> C,0,-0.7401360243,-1.9437653308,5.5100871122<br/> H,0,-1.4916442707,-2.1940738888,4.7610950565<br/> H,0,-0.9709330771,-0.9473159808,5.8900366229<br/> H,0,-0.8244697789,-2.6507321558,6.3388646267<br/> C,0,0.9490871863,-3.412139269,4.4092549587<br/> H,0,1.9466912046,-3.4871829091,3.9729362013<br/> H,0,0.2277708173,-3.7061963485,3.6469033399<br/> H,0,0.8875226932,-4.1237728872,5.235833554<br/> H,0,-1.5274707927,-1.1280722649,0.0135620469<br/> B,0,-2.6129230599,-0.4166388811,0.4838579823<br/> H,0,-3.4106690585,-0.6506275049,-0.4011390598<br/> H,0,-2.2227048375,0.7961438166,0.4880130591<br/> O,0,-2.9677917593,-0.8026178398,1.78129078<br/> C,0,-3.486447311,-2.0891377291,1.9587992904<br/> H,0,-4.007388965,-2.1322202953,2.9172328996<br/> H,0,-4.1950900554,-2.364189467,1.1655705016<br/> H,0,-2.6832402237,-2.8370620244,1.9766238764</p>                                                                                                                                                                  |
| <p>Ph—≡—Ph</p>                                                                                                                                                                                                                                                                                                                                                                                                                                                                                                                                                                                                                                                                                                                                                                                                                                                                                                                                                                                                                                                                                                                                                               | <p>Ph  Ph</p>                                                                                                                                                                                                                                                                                                                                                                                                                                                                                                                                                                                                                                                                                                                                                                                                                                                                                                                                                                                                                                                                                                                                                                                                                                                 |
| <p>C,0,0.000000022,0.,1.0480113544<br/> C,0,-0.000000022,0.,2.2581706456<br/> C,0,0.000000074,0.,-0.365754781<br/> C,0,0.000000176,0.,-3.1614923685<br/> C,0,0.00000001,1.206020066,-1.0813747423<br/> C,0,0.00000001,-1.206020066,-1.0813747423<br/> C,0,0.0000000151,-1.2007031289,-2.4643176062<br/> C,0,0.0000000151,1.2007031289,-2.4643176062<br/> H,0,0.000000008,2.1409027812,-0.5361678198<br/> H,0,0.000000008,-2.1409027812,-0.5361678198<br/> H,0,0.000000017,-2.140034055,-3.0030346642<br/> H,0,0.000000017,2.140034055,-3.0030346642<br/> H,0,0.0000000216,0.,-4.2440934118<br/> C,0,-0.000000074,0.,3.671936781<br/> C,0,-0.000000176,0.,6.4676743685<br/> C,0,-0.00000001,-1.206020066,4.3875567423<br/> C,0,-0.00000001,1.206020066,4.3875567423<br/> C,0,-0.0000000151,1.2007031289,5.7704996062<br/> C,0,-0.0000000151,-1.2007031289,5.7704996062<br/> H,0,-0.000000008,-2.1409027812,3.8423498198<br/> H,0,-0.000000008,2.1409027812,3.8423498198<br/> H,0,-0.000000017,2.140034055,6.3092166642<br/> H,0,-0.000000017,-2.140034055,6.3092166642<br/> H,0,-0.0000000216,0.,7.5502754118</p>                                                             | <p>C,0,0.0258916976,-0.3408995022,1.0927043186<br/> H,0,-0.0133384756,0.6341304726,1.5715201569<br/> C,0,0.1151577218,-0.3374178904,-0.2460470074<br/> H,0,0.2270694133,0.63679738,-0.7149472587<br/> C,0,0.0581899929,-1.4527884861,-1.1904582834<br/> C,0,-0.0640168478,-3.5151737717,-3.0859005104<br/> C,0,0.7858604232,-1.3813876496,-2.3828043048<br/> C,0,-0.7588303682,-2.5705126428,-0.9851458813<br/> C,0,-0.8173911026,-3.5876041885,-1.9206957089<br/> C,0,0.7357992123,-2.4053460941,-3.3144886854<br/> H,0,1.4044796272,-0.5106957735,-2.5699486004<br/> H,0,-1.3603195538,-2.6284302607,-0.0865385715<br/> H,0,-1.4621571561,-4.4400629972,-1.7451898923<br/> H,0,1.3170874263,-2.332941357,-4.2254886531<br/> H,0,-0.1114749785,-4.3132364845,-3.8161491576<br/> C,0,-0.0007165414,-1.4669523362,2.0257137304<br/> C,0,-0.0331498912,-3.5518614842,3.900059146<br/> C,0,0.7308776707,-2.6402716079,1.808747053<br/> C,0,-0.7215010019,-1.353678388,3.2189991713<br/> C,0,-0.7481844302,-2.3879340041,4.1402136529<br/> C,0,0.7131800689,-3.6683519652,2.7338933255<br/> H,0,1.3267240589,-2.7336881432,0.9093699237<br/> H,0,-1.2736342124,-0.4412827631,3.4152138286<br/> H,0,-1.3228117988,-2.2817015636,5.0521223274<br/> H,0,1.2927409079,-4.5646314506,2.5494918776<br/> H,0,-0.0455307379,-4.3586199792,4.6221442516</p> |
|  <p><b>PNNCo-H + Ph-C<sub>2</sub>-Ph-trigonal bipyramidal</b></p>                                                                                                                                                                                                                                                                                                                                                                                                                                                                                                                                                                                                                                                                                                                                                                                                                                                                                                                                                                                                                         |  <p><b>PNNCo-H + Ph-C<sub>2</sub>-Ph-tetragonal pyramidal</b></p>                                                                                                                                                                                                                                                                                                                                                                                                                                                                                                                                                                                                                                                                                                                                                                                                                                                                                                                                                                                                                                                                                                                                                                                          |
| <p>Co,0,0.438919764,0.4852516629,-0.0016240422<br/> P,0,1.1269307444,0.729775933,-2.1112686301<br/> N,0,1.903229986,-0.9632870359,0.0790520975<br/> C,0,3.8833793387,-2.8290576719,0.4204378678<br/> C,0,2.0191895929,-1.5962050582,1.2730598781<br/> C,0,2.8374830402,-1.1106153106,-0.8650402664<br/> C,0,3.8347807119,-2.0667192209,-0.7436439293<br/> C,0,3.0006743192,-2.5737089515,1.4513762468<br/> H,0,4.5689757622,-2.1932616018,-1.5285160985</p>                                                                                                                                                                                                                                                                                                                                                                                                                                                                                                                                                                                                                                                                                                                  | <p>Co,0,0.1073292663,0.3644730385,-0.3008252627<br/> P,0,0.923949819,0.451049842,-2.3170320593<br/> N,0,1.5434971012,-0.9897250879,0.0111084019<br/> C,0,3.7640851344,-2.4611919402,0.6837758128<br/> C,0,1.8170389266,-1.2242857582,1.3243543139<br/> C,0,2.3441365209,-1.4642182211,-0.9581243566<br/> C,0,3.4742977212,-2.2061346582,-0.6540247275<br/> C,0,2.9386934556,-1.9757720504,1.678300482<br/> H,0,4.1067925927,-2.5825814829,-1.4466712279</p>                                                                                                                                                                                                                                                                                                                                                                                                                                                                                                                                                                                                                                                                                                                                                                                                                                                                                    |

|                                               |                                               |
|-----------------------------------------------|-----------------------------------------------|
| H,0,3.0714837959,-3.0993735149,2.3941302274   | H,0,3.1533186346,-2.1549420657,2.7232547492   |
| H,0,4.6448567318,-3.5905550877,0.5356927013   | H,0,4.6421172448,-3.0392511907,0.9442728079   |
| C,0,2.7996701808,-0.0847138,-1.9592282154     | C,0,1.8954490062,-1.1494897775,-2.3528662045  |
| H,0,3.1678506586,-0.473049333,-2.9113494767   | H,0,1.1843215549,-1.9227264713,-2.6573178652  |
| H,0,3.4867477285,0.71631355065,-1.6654651763  | H,0,2.7180392328,-1.1744847088,-3.0688308265  |
| C,0,1.5531317809,2.4432076623,-2.8305342054   | C,0,2.2662156598,1.7985720928,-2.3871440629   |
| C,0,0.3310392432,-0.3597378488,-3.4664492659  | C,0,-0.1433648073,0.4399470349,-3.8809742719  |
| C,0,-1.15926528,-0.0501838907,-3.5880750534   | C,0,-1.1836255664,1.5543082692,-3.7458849104  |
| H,0,-1.6710013227,-0.1854745841,-2.6367384487 | H,0,-1.7140911002,1.4878311138,-2.7945163414  |
| H,0,-1.6119686919,-0.7347704908,-4.3111271883 | H,0,-1.9168906844,1.4622736391,-4.5512297789  |
| H,0,-1.3524531508,0.9634447154,-3.9358984671  | H,0,-0.7464520071,2.5481314194,-3.8137373695  |
| C,0,0.4877334369,-1.7180736925,-2.965345308   | C,0,-0.8909554992,-0.8956589476,-3.0683474348 |
| H,0,-0.1150557793,-2.4669929605,-3.5849666956 | H,0,-1.6793490512,-0.8557906131,-4.6487428265 |
| H,0,0.1558013849,-1.9104189715,-1.9317634113  | H,0,-1.3653984659,-1.1022732256,-2.9313541577 |
| H,0,1.5191283795,-2.1473919704,-3.0243337045  | H,0,-0.2438922741,-1.7350335148,-4.1516410932 |
| C,0,0.9813237046,-0.2515304261,-4.8408165126  | C,0,0.6433465743,0.58971172,-5.1772259706     |
| H,0,0.556003603,-1.0164877805,-5.4966525222   | H,0,-0.0323961457,0.4781939041,-6.0293449921  |
| H,0,2.0589273549,-0.4206403047,-4.8123066781  | H,0,1.4199643279,-0.1710458331,-5.2792301322  |
| H,0,0.7985961413,0.7120075308,-5.3156412136   | H,0,1.112802141,1.5694364764,-5.2680506849    |
| C,0,0.3091545148,3.0304299385,-3.4936789703   | C,0,1.6238636268,3.1334002545,-2.7544139343   |
| H,0,0.054345799,2.5256271618,-4.4255555703    | H,0,1.3175927358,3.1735725807,-3.7997812494   |
| H,0,0.4891951944,4.0809360408,-3.7348985165   | H,0,2.3476893578,3.9371680973,-2.5988980333   |
| H,0,-0.5589017672,2.9927977515,-2.8318743711  | H,0,0.7536336158,3.3445776911,-2.1306878415   |
| C,0,1.9378049473,3.347224325,-1.659699973     | C,0,2.8183943172,1.910204511,-0.9615698783    |
| H,0,1.1144288179,3.4715138742,-0.9565331074   | H,0,2.0317278965,2.1486622259,-0.2404207475   |
| H,0,2.2138512403,4.3313082697,-2.0481872708   | H,0,3.5572542968,2.7149157894,-0.9224327384   |
| H,0,2.7881215704,2.9590076378,-1.0970972021   | H,0,3.3144915888,0.9956481636,-0.6338442544   |
| C,0,2.7152005861,2.4268431591,-3.8228068846   | C,0,3.419723366,1.4861285388,-3.3344907103    |
| H,0,2.5290008786,1.8076552446,-4.6967231009   | H,0,3.0992965364,1.3360067856,-4.3641999059   |
| H,0,3.6448622536,2.0912516749,-3.3628132111   | H,0,3.9776677964,0.6034552106,-3.0190664598   |
| H,0,2.8899888003,3.4451269146,-4.1797568794   | H,0,4.1244650954,2.3217092715,-3.3318235934   |
| C,0,1.119803585,-1.083071527,2.2636856454     | C,0,0.8562625265,-0.6347369848,2.207906652    |
| N,0,0.3698908496,-0.0041383909,1.8978189715   | N,0,-0.1017895272,0.1397241163,1.6167404009   |
| C,0,0.8266052277,-1.3837101608,3.5958494353   | C,0,0.556673309,-0.739962321,3.566418041      |
| H,0,1.2401704082,-2.1750883974,4.1993807309   | H,0,1.0991043129,-1.282750986,4.3235708228    |
| C,0,-0.1341951771,-0.44292628,3.9527659388    | C,0,-0.61600455,-0.0011740037,3.7096697283    |
| N,0,-0.3981403594,0.385641603,2.9103297628    | N,0,-0.9932261274,0.5309117561,2.5231700891   |
| C,0,-0.8893640454,-0.2762832686,5.246809248   | C,0,-1.4787162876,0.219565564,4.925875064     |
| C,0,-0.3404705736,-1.2253877909,6.307371476   | C,0,-0.8186241272,-0.3778558322,6.164194806   |
| H,0,-0.4399678941,-2.2684204362,5.9995665731  | H,0,-0.6720070606,-1.45475842,6.0594737644    |
| H,0,-0.8843061583,-1.1055337576,7.2461052418  | H,0,-1.4410388737,-0.2143864225,7.0457264567  |
| H,0,0.715542931,-1.0341516891,6.506489211     | H,0,0.1554151775,0.0762400756,6.355708451     |
| C,0,-0.7600216088,1.1681405666,5.7355850544   | C,0,-1.6975284957,1.7199854119,5.134675095    |
| H,0,-1.1389290544,1.8628753518,4.9865327429   | H,0,-2.15362276,2.1679190417,4.2521432097     |
| H,0,0.2824168542,1.4248890066,5.9302670512    | H,0,-0.7522907563,2.2336563568,5.3171883214   |
| H,0,-1.3234998737,1.3152042157,6.6599698448   | H,0,-2.3510850734,1.8994677009,5.9915814974   |
| C,0,-2.368729099,-0.5930499681,5.000428388    | C,0,-2.8342774202,-0.4573805583,4.6935564998  |
| H,0,-2.4995810527,-1.6299243364,4.6823955524  | H,0,-2.715562697,-1.5336501457,4.5515553757   |
| H,0,-2.7743780309,0.0492736229,4.2181829496   | H,0,-3.3166849293,-0.0558856737,3.8016313462  |
| H,0,-2.9571065183,-0.4445345362,5.9091214212  | H,0,-3.5002730016,-0.301525751,5.5456266713   |
| C,0,-1.7600851967,0.4308345133,-0.15703253    | C,0,-2.5931916541,-0.7927661659,-0.5206810584 |
| C,0,-1.6888945048,-0.7907636179,-0.0896292768 | C,0,-1.8853082336,-1.7622384959,-0.3478655591 |
| H,0,1.5081379923,1.5041450945,0.2413086538    | H,0,-0.7978858252,1.5628974943,-0.4765607748  |
| C,0,-2.0801762267,1.8175975934,-0.2261460769  | C,0,-3.4595650455,0.3085172569,-0.7189802568  |
| C,0,-2.6204312784,4.5484790848,-0.3814593992  | C,0,-1.0809788259,-2.8870582208,-0.0502767425 |
| C,0,-2.7997499813,2.3376805626,-1.3106881941  | C,0,-3.5200993315,1.3282072854,0.2427152286   |
| C,0,-1.6483192449,2.6826823538,0.7928635045   | C,0,-4.361513732,2.4072717925,0.0432384426    |
| C,0,-1.920960655,4.0364222405,0.7046872234    | C,0,-5.1433268556,2.4929679081,-1.1027800212  |
| C,0,-3.0661044438,3.694352038,-1.3813902115   | C,0,-4.2507557024,0.3990726665,-1.8709285587  |
| H,0,-3.1461163627,1.6685358275,-2.0880588899  | C,0,-5.0856298623,1.4872383074,-2.0580144184  |
| H,0,-1.1269552152,2.2617158053,1.648078763    | H,0,-2.8815210658,1.2586490237,1.1187112528   |
| H,0,-1.5870890802,4.6980242587,1.4942832547   | H,0,-4.4023662601,3.1946759097,0.7857091322   |
| H,0,-3.6251955476,4.0870566804,-2.2218414123  | H,0,-5.7971829602,3.3435060121,-1.2515231455  |
| H,0,-2.8280476733,5.6094517675,-0.4430534297  | H,0,-4.1986645261,-0.3894707807,-2.6121959632 |
| C,0,-1.7648821493,-2.1850143842,0.1408334056  | H,0,-5.6942058204,1.5504297992,-2.9516823731  |
| C,0,-1.9254607012,-4.9236661065,0.6588686159  | C,0,-0.5313802123,-3.6810078882,-1.0665167639 |
| C,0,-2.0421898748,-3.0907439621,-0.8938287812 | C,0,0.295307636,-4.7454260617,-0.7539217857   |
| C,0,-1.5894733703,-2.6745719544,1.4439082876  | C,0,0.5805621303,-5.0435910825,0.5726456295   |

|                                                                                                                                                                                                                                                                                                                                                                                                                                                                                                                                                                                                                                                                                                                                                                                                                                                                                                                                                                                                                                                                                                                                                                                                                                                                                                                                                                                                                                                                                                                                                                                                                                                                                                                                                                                                                                                                                                                                                                                                                                                                                                                                                                                                                                                                                                                                                                                                                                                                                                                                                                                                                                                                                                                                     |                                                                                                                                                                                                                                                                                                                                                                                                                                                                                                                                                                                                                                                                                                                                                                                                                                                                                                                                                                                                                                                                                                                                                                                                                                                                                                                                                                                                                                                                                                                                                                                                                                                                                                                                                                                                                                                                                                                                                                                                                                                                                                                                                                                                                                                                                                                                                                                                                                                                                                                                                                                                                                                                                                               |
|-------------------------------------------------------------------------------------------------------------------------------------------------------------------------------------------------------------------------------------------------------------------------------------------------------------------------------------------------------------------------------------------------------------------------------------------------------------------------------------------------------------------------------------------------------------------------------------------------------------------------------------------------------------------------------------------------------------------------------------------------------------------------------------------------------------------------------------------------------------------------------------------------------------------------------------------------------------------------------------------------------------------------------------------------------------------------------------------------------------------------------------------------------------------------------------------------------------------------------------------------------------------------------------------------------------------------------------------------------------------------------------------------------------------------------------------------------------------------------------------------------------------------------------------------------------------------------------------------------------------------------------------------------------------------------------------------------------------------------------------------------------------------------------------------------------------------------------------------------------------------------------------------------------------------------------------------------------------------------------------------------------------------------------------------------------------------------------------------------------------------------------------------------------------------------------------------------------------------------------------------------------------------------------------------------------------------------------------------------------------------------------------------------------------------------------------------------------------------------------------------------------------------------------------------------------------------------------------------------------------------------------------------------------------------------------------------------------------------------------|---------------------------------------------------------------------------------------------------------------------------------------------------------------------------------------------------------------------------------------------------------------------------------------------------------------------------------------------------------------------------------------------------------------------------------------------------------------------------------------------------------------------------------------------------------------------------------------------------------------------------------------------------------------------------------------------------------------------------------------------------------------------------------------------------------------------------------------------------------------------------------------------------------------------------------------------------------------------------------------------------------------------------------------------------------------------------------------------------------------------------------------------------------------------------------------------------------------------------------------------------------------------------------------------------------------------------------------------------------------------------------------------------------------------------------------------------------------------------------------------------------------------------------------------------------------------------------------------------------------------------------------------------------------------------------------------------------------------------------------------------------------------------------------------------------------------------------------------------------------------------------------------------------------------------------------------------------------------------------------------------------------------------------------------------------------------------------------------------------------------------------------------------------------------------------------------------------------------------------------------------------------------------------------------------------------------------------------------------------------------------------------------------------------------------------------------------------------------------------------------------------------------------------------------------------------------------------------------------------------------------------------------------------------------------------------------------------------|
| <p>C,0,-1.6651429207,-4.0322660995,1.6920901522<br/> C,0,-2.1208012942,-4.4464999758,-0.631033064<br/> H,0,-2.201849803,-2.7166660095,-1.897571451<br/> H,0,-1.3994494868,-1.9740293512,2.2464965719<br/> H,0,-1.5230949153,-4.3944533219,2.7035095146<br/> H,0,-2.3382843015,-5.1362971016,-1.4370814556<br/> H,0,-1.9843997853,-5.9863277506,0.858234416</p>                                                                                                                                                                                                                                                                                                                                                                                                                                                                                                                                                                                                                                                                                                                                                                                                                                                                                                                                                                                                                                                                                                                                                                                                                                                                                                                                                                                                                                                                                                                                                                                                                                                                                                                                                                                                                                                                                                                                                                                                                                                                                                                                                                                                                                                                                                                                                                      | <p>C,0,-0.8022560545,-3.2074908165,1.2858610758<br/> C,0,0.0247608132,-4.2747645764,1.5868782805<br/> H,0,-0.7633240066,-3.4495024743,-2.0995011293<br/> H,0,0.7175024611,-5.349011456,-1.5482084229<br/> H,0,1.2317241005,-5.8743347518,0.8142394919<br/> H,0,-1.2236044825,-2.5936999568,2.0725150006<br/> H,0,0.2433349611,-4.5019333756,2.6234903822</p>                                                                                                                                                                                                                                                                                                                                                                                                                                                                                                                                                                                                                                                                                                                                                                                                                                                                                                                                                                                                                                                                                                                                                                                                                                                                                                                                                                                                                                                                                                                                                                                                                                                                                                                                                                                                                                                                                                                                                                                                                                                                                                                                                                                                                                                                                                                                                  |
| 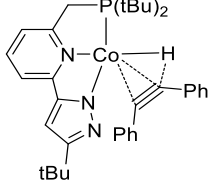 <p><b>TS1</b></p>                                                                                                                                                                                                                                                                                                                                                                                                                                                                                                                                                                                                                                                                                                                                                                                                                                                                                                                                                                                                                                                                                                                                                                                                                                                                                                                                                                                                                                                                                                                                                                                                                                                                                                                                                                                                                                                                                                                                                                                                                                                                                                                                                                                                                                                                                                                                                                                                                                                                                                                                                                                                                                 |  <p><b>PNNCo-cis-PhC=CHPh</b></p>                                                                                                                                                                                                                                                                                                                                                                                                                                                                                                                                                                                                                                                                                                                                                                                                                                                                                                                                                                                                                                                                                                                                                                                                                                                                                                                                                                                                                                                                                                                                                                                                                                                                                                                                                                                                                                                                                                                                                                                                                                                                                                                                                                                                                                                                                                                                                                                                                                                                                                                                                                                           |
| <p>N,0,1.2308099169,-1.0166618892,0.1974215768<br/> C,0,1.4376999714,-1.1823566653,1.5370878074<br/> C,0,2.4917899252,-1.9877167907,1.9784374431<br/> C,0,3.3198593009,-2.5863818506,1.0529342394<br/> C,0,3.110144977,-2.3813231489,-0.3093010347<br/> C,0,2.0494541809,-1.5853764187,-0.7059983083<br/> Co,0,-0.2299777202,0.2101500657,-0.2894696819<br/> P,0,0.9509376747,0.4159670433,-2.1955813084<br/> N,0,-0.3641482039,0.3395823208,1.6699662996<br/> N,0,-1.1698202093,0.9599641043,2.5228680778<br/> C,0,-0.8091563882,0.5671462137,3.7691170123<br/> C,0,0.2557162597,-0.3279423595,3.7135389597<br/> C,0,0.5143645178,-0.4577672359,2.3476191525<br/> C,0,-1.6793847375,-1.1208213783,-0.8431622781<br/> C,0,-2.2345655422,0.0151759654,-0.7230221449<br/> C,0,-3.4565300365,0.7646491745,-0.6021518455<br/> C,0,-3.5154987755,1.9875962315,0.0730585491<br/> C,0,-4.7175527191,2.6621643815,0.1952540992<br/> C,0,-5.8774432022,2.1382643045,-0.3595165574<br/> C,0,-5.8296559622,0.9235782411,-1.0326584558<br/> C,0,-4.6337581382,0.2400833837,-1.1543394964<br/> C,0,-1.7122580551,-2.5262594409,-1.0872806409<br/> C,0,-0.9913003369,-3.4224184457,-0.2812260731<br/> C,0,-1.0196800012,-4.7820757264,-0.532306748<br/> C,0,-1.7458782093,-5.2874361507,-1.6035787745<br/> C,0,-2.4628282758,-4.4158761621,-2.4125678551<br/> C,0,-2.453911018,-3.0558235508,-2.1579887715<br/> H,0,3.7546322592,-2.8311311694,-1.0521063046<br/> H,0,2.6503036873,-2.1164662243,3.0403728429<br/> H,0,4.1426633424,-3.2073410264,1.3848129218<br/> C,0,1.71554274,-1.2860214006,-2.1318836883<br/> H,0,0.9187772294,-1.9668532475,-2.4476532451<br/> H,0,2.5664159167,-1.4454844977,-2.7963411413<br/> C,0,2.4377144525,1.6033039219,-2.0173790928<br/> C,0,0.1852696979,0.5579629051,-3.9270614439<br/> C,0,-0.7936962086,1.7343978276,-3.9049886272<br/> H,0,-1.5525859503,1.6022190856,-3.1322623428<br/> H,0,-1.3052860168,1.7956531412,-4.8686140927<br/> H,0,-0.3051852309,2.6914047845,-3.732974903<br/> C,0,-0.6275978546,-0.7131390987,-4.1739620739<br/> H,0,-1.2194486107,-0.5830070799,-5.0831823697<br/> H,0,-1.3173623716,-0.9132392966,-3.3556590478<br/> H,0,-0.0020234766,-1.5939194651,-4.3209000073<br/> C,0,1.1918070378,0.7190019832,-5.0607190207<br/> H,0,0.6609570577,0.6994681651,-6.0164301762<br/> H,0,1.920650709,-0.0931892743,-5.08141119<br/> H,0,1.7339889757,1.6626709932,-5.0170236593<br/> C,0,2.0054657502,3.0062225527,-2.4382423768<br/> H,0,1.8286022954,3.0909442289,-3.5098175184<br/> H,0,2.7940506938,3.7182613806,-2.1833924184<br/> H,0,1.1000792779,3.3203716604,-1.9150145176<br/> C,0,2.8030495416,1.6572879809,-0.5296530996<br/> H,0,1.946706692,1.9164290923,0.0965839864</p> | <p>Co,0,1.063225438,-0.8217961092,0.0451018244<br/> P,0,1.8178450906,-0.466087548,-2.0308325985<br/> N,0,2.8919760222,-0.1363795323,0.5635459233<br/> C,0,5.1645271493,1.1577525311,1.4259216705<br/> C,0,3.0004539283,0.2337777725,1.8711986702<br/> C,0,3.8808428577,0.1294830957,-0.3061606217<br/> C,0,5.0339734109,0.7874592486,0.0905004444<br/> C,0,4.154292261,0.8781118413,2.3225249717<br/> H,0,5.8141793142,0.9954694157,-0.6291795425<br/> H,0,4.2293672293,1.1683026122,3.3615063638<br/> H,0,6.0586478709,1.6695662513,1.7596230258<br/> C,0,3.6521937209,-0.3711056049,-1.6976064608<br/> H,0,4.0169296993,-1.3994817261,-1.7530240438<br/> H,0,4.2134510243,0.1994005944,-2.4387641728<br/> C,0,1.3433569457,1.3274397992,-2.4835272386<br/> C,0,1.6924018896,-1.6066786342,-3.5420001981<br/> C,0,0.232560512,-2.0380232323,-3.6953991044<br/> H,0,0.1510514585,-2.7391145564,-4.5294515413<br/> H,0,-0.4374376969,-1.2047205687,-3.8983637425<br/> H,0,-0.1360830686,-2.5354831058,-2.7978839041<br/> C,0,2.5380794308,-2.8506965104,-3.2525010907<br/> H,0,2.266551162,-3.6389505068,-3.9574213358<br/> H,0,2.3792141993,-3.2455501221,-2.2480733527<br/> H,0,3.6045706203,-2.6622093527,-3.3770640423<br/> C,0,2.2048735038,-0.9778463228,-4.8341452239<br/> H,0,2.1846399464,-1.7268170523,-5.6301268557<br/> H,0,3.2369394079,-0.6339233271,-4.7431801682<br/> H,0,1.5946073645,-0.1408368141,-5.1688336665<br/> C,0,0.0289472864,1.339700263,-3.2614471083<br/> H,0,0.1368272735,0.9519000942,-4.2733328021<br/> H,0,-0.3241587609,2.3702259033,-3.3479944879<br/> H,0,-0.7494581916,0.7656970252,-2.7581717345<br/> C,0,1.1195576922,2.0529143827,-1.1514866963<br/> H,0,0.3512034728,1.5679948773,-0.5416353732<br/> H,0,0.7800496531,3.0730795733,-1.3481012019<br/> H,0,2.0308267024,2.1213390897,-0.5564128646<br/> C,0,2.4224712241,2.0716638964,-3.2635284785<br/> H,0,2.6826815164,1.5858068301,-4.2025325441<br/> H,0,3.3348596808,2.1987817341,-2.6791606397<br/> H,0,2.0607711683,3.0740755485,-3.5062220157<br/> C,0,1.8366156848,-0.0712320463,2.6420912649<br/> N,0,0.7925749449,-0.619965641,1.9521655079<br/> C,0,1.4580363401,0.0548090206,3.9750538095<br/> H,0,2.0406049006,0.4444319974,4.7947342356<br/> C,0,0.1561489739,-0.449377582,4.0046533528<br/> N,0,-0.229275958,-0.8446993267,2.7727794391<br/> C,0,-0.7775739309,-0.5555731785,5.1845685431<br/> C,0,-0.0580083364,-1.2409276894,6.3491887497<br/> H,0,0.2648101726,-2.246173556,6.0751985326<br/> H,0,-0.7188339554,-1.3224604776,7.2150155992<br/> H,0,0.8257103634,-0.6810953956,6.6602818428<br/> C,0,-1.2029491008,0.8514687062,5.6197116826<br/> H,0,-1.7201751426,1.3704368555,4.8116602834</p> |

|                                                                                                                                                                                                                                                                                                                                                                                                                                                                                                                                                                                                                                                                                                                                                                                                                                                                                                                                                                                                                                                                                                                                                                                                                                                                                                                                                                                                                                                                                                                                                                                   |                                                                                                                                                                                                                                                                                                                                                                                                                                                                                                                                                                                                                                                                                                                                                                                                                                                                                                                                                                                                                                                                                                                                                                                                                                                                                                                                                                                                                                                                                                                                                                                                             |
|-----------------------------------------------------------------------------------------------------------------------------------------------------------------------------------------------------------------------------------------------------------------------------------------------------------------------------------------------------------------------------------------------------------------------------------------------------------------------------------------------------------------------------------------------------------------------------------------------------------------------------------------------------------------------------------------------------------------------------------------------------------------------------------------------------------------------------------------------------------------------------------------------------------------------------------------------------------------------------------------------------------------------------------------------------------------------------------------------------------------------------------------------------------------------------------------------------------------------------------------------------------------------------------------------------------------------------------------------------------------------------------------------------------------------------------------------------------------------------------------------------------------------------------------------------------------------------------|-------------------------------------------------------------------------------------------------------------------------------------------------------------------------------------------------------------------------------------------------------------------------------------------------------------------------------------------------------------------------------------------------------------------------------------------------------------------------------------------------------------------------------------------------------------------------------------------------------------------------------------------------------------------------------------------------------------------------------------------------------------------------------------------------------------------------------------------------------------------------------------------------------------------------------------------------------------------------------------------------------------------------------------------------------------------------------------------------------------------------------------------------------------------------------------------------------------------------------------------------------------------------------------------------------------------------------------------------------------------------------------------------------------------------------------------------------------------------------------------------------------------------------------------------------------------------------------------------------------|
| <p>H,0,3.5690173765,2.4228953419,-0.3822501723<br/> H,0,3.2137618277,0.7155901912,-0.1662019031<br/> C,0,3.6744648791,1.1660969821,-2.7962923027<br/> H,0,3.5064524733,1.0949204314,-3.868744843<br/> H,0,4.0520597193,0.2041481387,-2.4460059929<br/> H,0,4.474703244,1.8944388841,-2.6405701435<br/> H,0,0.7578919808,-0.8158414083,4.5328566689<br/> C,0,-1.5540476045,1.11221474,4.9610177631<br/> C,0,-0.9992562499,0.5195280265,6.2522468983<br/> H,0,-1.0972134557,-0.5676312975,6.2673261608<br/> H,0,-1.5389617628,0.912684228,7.1156182457<br/> H,0,0.0569083241,0.7634076269,6.3828833591<br/> C,0,-1.4061831171,2.6363222851,4.9942554534<br/> H,0,-1.7877960602,3.0777802141,4.0737146475<br/> H,0,-0.3596096844,2.9285365946,5.0965008141<br/> H,0,-1.9592556532,3.0604136326,5.8357643413<br/> C,0,-3.0384693756,0.7580850052,4.8307714387<br/> H,0,-3.185294786,-0.3231042947,4.8188410971<br/> H,0,-3.4490918752,1.1590635863,3.9039933014<br/> H,0,-3.6084942063,1.1676102547,5.6681498311<br/> H,0,-1.2084837331,1.3002355595,-0.6199797823<br/> H,0,-2.6123040895,2.3715343393,0.5330581397<br/> H,0,-4.7508356349,3.6021047925,0.7324534027<br/> H,0,-6.8154805812,2.6709437158,-0.2654971756<br/> H,0,-4.595487216,-0.7100423821,-1.673647353<br/> H,0,-6.7310057104,0.507727677,-1.4662040455<br/> H,0,-3.0205410037,-2.381525039,-2.7893768522<br/> H,0,-3.0398550678,-4.7995913392,-3.2453306106<br/> H,0,-1.757565554,-6.351489105,-1.8026803339<br/> H,0,-0.4281534809,-3.0335824183,0.5573186808<br/> H,0,-0.466294752,-5.4545377021,0.1120730308</p> | <p>H,0,-0.3403263351,1.4561748065,5.9054599586<br/> H,0,-1.8778478124,0.8042514006,6.4776179509<br/> C,0,-2.0173443423,-1.3635594842,4.8108754778<br/> H,0,-1.74961855,-2.3696274074,4.4867055158<br/> H,0,-2.5620957645,-0.8954157213,3.9916126204<br/> H,0,-2.6858992755,-1.4436581125,5.6706056636<br/> C,0,-0.7119420776,-1.4758690903,-0.2948201839<br/> C,0,-0.771677078,-2.8588226673,0.1816037921<br/> C,0,-0.7583730492,-5.4535523106,1.2634176841<br/> C,0,-1.6787704818,-3.2282500902,1.187292353<br/> C,0,0.1555719008,-3.8196303144,-0.240268108<br/> C,0,0.1578949398,-5.1038440906,0.2838294076<br/> C,0,-1.6711858095,-4.5055187329,1.7143325576<br/> H,0,-2.3728607472,-2.483956791,1.5550109178<br/> H,0,0.8750266001,-3.5468766456,-1.0049798128<br/> H,0,0.8798534479,-5.8299600659,-0.0709046573<br/> H,0,-2.3803134804,-4.7663721885,2.4913283081<br/> H,0,-0.7566757666,-6.452578296,1.6813487262<br/> C,0,-1.7536553875,-0.7407349503,-0.7236004011<br/> H,0,-1.5943780769,0.331224872,-0.8474156364<br/> C,0,-3.1116541033,-1.1554049596,-1.0711516157<br/> C,0,-5.7485999271,-1.8349412883,-1.7871507733<br/> C,0,-4.1364373522,-0.1988878635,-1.0799137259<br/> C,0,-3.4442209094,-2.4601493365,-1.463829914<br/> C,0,-4.742067886,-2.7924942143,-1.8098594202<br/> C,0,-5.4351805846,-0.5325723096,-1.4245181895<br/> H,0,-3.8981917373,0.8212986954,-0.7976092988<br/> H,0,-2.67010605,-3.2161364989,-1.5055404803<br/> H,0,-4.9700760038,-3.8085579993,-2.1098389382<br/> H,0,-6.2071291079,0.2278561483,-1.4114102945<br/> H,0,-6.7626945429,-2.0994498733,-2.0595476124</p> |
| 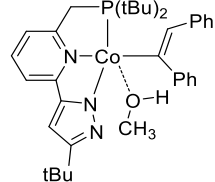 <p><b>PNNCo-cis-PhC=CHPh + CH<sub>3</sub>OH</b></p>                                                                                                                                                                                                                                                                                                                                                                                                                                                                                                                                                                                                                                                                                                                                                                                                                                                                                                                                                                                                                                                                                                                                                                                                                                                                                                                                                                                                                                           |  <p><b>TS2</b></p>                                                                                                                                                                                                                                                                                                                                                                                                                                                                                                                                                                                                                                                                                                                                                                                                                                                                                                                                                                                                                                                                                                                                                                                                                                                                                                                                                                                                                                                                                                      |
| <p>Co,0,0.1255421504,0.8827118509,-0.0119335336<br/> P,0,0.0814275835,1.193197172,-2.2315320545<br/> N,0,-0.1437928448,2.8782922266,-0.0002854198<br/> C,0,-0.2519272259,5.6243770568,0.1340503547<br/> C,0,0.19466615,3.5063577359,1.1588597598<br/> C,0,-0.5529909111,3.5820631186,-1.0682240797<br/> C,0,-0.6096600228,4.9666479709,-1.0397074218<br/> C,0,0.1425141919,4.8999179749,1.2402919574<br/> H,0,-0.9335877887,5.5138835557,-1.9147430033<br/> H,0,0.4217801539,5.3906584177,2.1626307752<br/> H,0,-0.2867527809,6.7058230911,0.179395006<br/> C,0,-0.9475699696,2.7504123535,-2.2446818869<br/> H,0,-0.9112974595,3.3126751015,-3.177981204<br/> H,0,-1.9783883958,2.4160193955,-2.1009536173<br/> C,0,-0.7862218984,0.0887605529,-3.5048866273<br/> C,0,1.7811303334,1.8007141897,-2.8755547945<br/> C,0,2.5307597865,0.6700251106,-3.5745725644<br/> H,0,3.5630250827,0.9828928912,-3.7495712152<br/> H,0,2.0992969618,0.4278367399,-4.5452700991<br/> H,0,2.560134593,-0.2411387065,-2.9756813036<br/> C,0,2.592862994,2.2275270757,-1.6480722086<br/> H,0,3.6017411127,2.5063907602,-1.963103129<br/> H,0,2.6861010217,1.4217493663,-0.9156820171<br/> H,0,2.1585270908,3.0897176306,-1.1424874103<br/> C,0,1.6629400179,2.9920459507,-3.8221575564<br/> H,0,2.6564090911,3.2552811858,-4.1941889339<br/> H,0,1.2677453957,3.8758510342,-3.3192565764<br/> H,0,1.0360433818,2.7840807545,-4.6895410335<br/> C,0,-0.0542058729,-1.249915011,-3.6442873941</p>                                                                                                    | <p>Co,0,-0.8027079731,-0.3339825101,0.7198516464<br/> P,0,-2.7845869628,-1.0267546593,-0.5140875958<br/> N,0,-1.9987865581,1.1448422588,1.1320187956<br/> C,0,-3.4495881784,3.3234328437,1.92031501<br/> C,0,-1.3839946636,2.3582796985,1.2043260449<br/> C,0,-3.3265568056,1.0252484898,1.2667168163<br/> C,0,-4.0849458117,2.1058947268,1.6929818612<br/> C,0,-2.1026495121,3.468433586,1.6455407659<br/> H,0,-5.1547919704,2.0008107927,1.8126052265<br/> H,0,-1.6105144942,4.4278890381,1.7275369356<br/> H,0,-4.0247590476,4.1749125531,2.2621564776<br/> C,0,-3.8946339701,-0.2802297655,0.8067111906<br/> H,0,-4.9362357282,-0.1580145203,0.5022302977<br/> H,0,-3.86984747,-1.0213798191,1.6127790994<br/> C,0,-3.5432792992,-2.7743210599,-0.671794737<br/> C,0,-3.1017332211,-0.0468768325,-2.1158763115<br/> C,0,-2.0056771832,-0.4587556296,-3.1051317195<br/> H,0,-2.0786665607,0.1593744198,-4.0033977358<br/> H,0,-2.07810327,-1.4979970855,-3.4199942182<br/> H,0,-1.0125351417,-0.3037044632,-2.6769309165<br/> C,0,-2.8974731722,1.4411766401,-1.8232525283<br/> H,0,-2.9754398538,1.9919765341,-2.7640157463<br/> H,0,-1.9090449232,1.639377268,-1.4082211802<br/> H,0,-3.6515893629,1.8478410925,-1.1478932336<br/> C,0,-4.4850298103,-0.2321915156,-2.7269179328<br/> H,0,-4.5881745476,0.421820018,-3.597284331<br/> H,0,-5.2801819404,0.0371184202,-2.0286771523<br/> H,0,-4.6653336514,-1.2497673336,-3.0700570779<br/> C,0,-3.1146324072,-3.4308649464,-1.9820923914</p>                                                                                                           |

H,0,0.8173516753,-1.1877518362,-4.2905302196  
H,0,-0.7326784452,-1.9811392252,-4.090305037  
H,0,0.271210545,-1.639335292,-2.6787591244  
C,0,-2.1703367113,-0.2025829347,-2.9189585552  
H,0,-2.0936039745,-0.6900167586,-1.9466741987  
H,0,-2.702390638,-0.8823712854,-3.5886195751  
H,0,-2.7873045746,0.6879454751,-2.8025709643  
C,0,-0.9314394933,0.7525256303,-4.8694922769  
H,0,0.0337654337,0.9296161733,-5.3451199453  
H,0,-1.4656625383,1.7027525361,-4.8176811525  
C,0,-1.5009377228,0.0985206846,-5.5351276434  
C,0,0.570566192,2.5995756342,2.1960820439  
N,0,0.5553670749,1.2729088574,1.8680695952  
C,0,0.9198749583,2.7183011725,3.5408025043  
H,0,1.0213881427,3.6210347182,4.1207010825  
C,0,1.1008942496,1.402535898,3.9577569764  
N,0,0.8838477528,0.5454306484,2.9339324947  
C,0,1.4712458061,0.8569255913,5.3133823436  
C,0,1.6101005197,1.9921667139,6.3225444223  
H,0,2.3902665922,2.6961324291,6.0267013086  
H,0,1.8755310983,1.599041626,7.3053812708  
H,0,0.6774909383,2.5498203315,6.4288823495  
C,0,0.3774969422,-0.1097869586,5.7789301165  
H,0,0.2684574876,-0.9352433346,5.0751883968  
H,0,-0.5873441948,0.3957298977,5.8559048482  
H,0,0.6196776625,-0.5260041044,6.7594828829  
C,0,2.7974914754,0.0983982193,5.2091406632  
H,0,3.605823912,0.7614424451,4.8965555102  
H,0,2.7235133543,-0.7051450909,4.4768144837  
H,0,3.0712944247,-0.3362351402,6.1733589482  
O,0,-2.2267618468,0.7830265954,0.2800623562  
C,0,1.6457956913,-1.5521751404,-0.3676969522  
C,0,2.368070838,-0.866813532,-0.8152784588  
C,0,0.4760072946,-1.0339339503,0.0508016096  
C,0,2.1194237192,-2.9367781688,-0.3509402251  
C,0,3.0987858875,-5.5742966677,-0.4459507511  
C,0,3.0882530334,-3.3246117551,-1.2871351626  
C,0,1.6743682757,-3.9078354671,0.5564697643  
C,0,2.1561618692,-5.2045141096,0.5050015412  
C,0,3.5672749275,-4.6223738094,-1.3406200463  
H,0,3.4628029139,-2.5826500683,-1.9860729248  
H,0,0.9600270447,-3.6338592511,1.3216316009  
H,0,1.8000146382,-5.9334455279,1.2233917631  
H,0,4.3118767686,-4.8918212678,-2.0804433885  
H,0,3.4735288098,-6.5896914615,-0.4799289918  
C,0,-0.6516934459,-1.8420582091,0.5353012745  
C,0,-2.9343582666,-3.2575982566,1.3885836477  
C,0,-1.3348193687,-2.7139475148,-0.3273769298  
C,0,-1.1455727701,-1.7030920161,1.8428879822  
C,0,-2.2646695825,-2.4074341621,2.2603902926  
C,0,-2.4594209921,-3.4077324076,0.0926075987  
H,0,-0.9605015742,-2.8550647633,-1.334906246  
H,0,-0.6110995032,-1.0481740413,2.5231220206  
H,0,-2.6153730863,-2.2913272778,3.2799571763  
H,0,-2.9640184591,-4.0755878806,-0.5957452905  
H,0,-3.8116141354,-3.801120452,1.7164790772  
C,0,-2.6674218921,1.3907873316,1.4927559109  
H,0,-3.7368698609,1.2274954737,1.6468736279  
H,0,-2.1115639744,1.0178067512,2.357592079  
H,0,-2.4846076735,2.459633911,1.3997960346  
H,0,-2.3246971468,-0.1742091724,0.3921106927

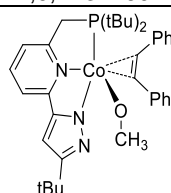

H,0,-2.0316794873,-3.4077482148,-2.1175020532  
H,0,-3.5744752617,-2.9756345535,-2.858048588  
H,0,-3.4161532684,-4.481259954,-1.9680339322  
C,0,-2.9670599391,-3.6052617475,0.475597989  
H,0,-1.8806338512,-3.6806351551,0.4182356124  
H,0,-3.380857691,-4.6160585751,0.4244581622  
H,0,-3.2013324265,-3.1898012825,1.4543420482  
C,0,-5.0667739485,-2.7920913687,-0.5617807867  
H,0,-5.5608656914,-2.1912974529,-1.3228276523  
H,0,-5.4080265192,-2.4493674279,0.4150958345  
H,0,-5.4213250251,-3.8200698497,-0.6774836971  
C,0,-0.0585230532,2.3127113317,0.6620671555  
N,0,0.2628118665,1.123972297,0.0547784868  
C,0,1.0022025913,3.1941313365,0.4644854761  
H,0,1.0799868177,4.2177085884,0.7921835794  
C,0,1.9314347555,2.4489175414,-0.2629294489  
N,0,1.4686340181,1.1997076349,-0.4953374338  
C,0,3.3040701049,2.826824284,-0.7598753128  
C,0,3.4076285187,2.5139960408,-2.2547261391  
H,0,3.207745006,1.4590047207,-2.442568441  
H,0,4.4067342635,2.7498338704,-2.6282192915  
H,0,2.6860228685,3.095809817,-2.8305685309  
C,0,3.5655852975,4.3113341615,-0.526505987  
H,0,3.5211902658,4.5638404486,0.5346719573  
H,0,2.8373723784,4.9329156763,-1.050921571  
H,0,4.5581243533,4.5850820345,-0.8882088907  
C,0,4.3495437575,2.0008222006,-0.0019650188  
H,0,4.3193933014,2.2123714348,1.0682476142  
H,0,5.3560480093,2.2243419929,-0.3634780198  
H,0,4.1684284558,0.9317335467,-0.1268837153  
C,0,0.7384051188,-1.7315348647,0.6220254801  
C,0,0.6739787622,-2.2942226351,-0.6106088855  
C,0,1.7358770533,-2.5511322353,-1.5791093694  
C,0,1.9885922104,-1.5338449655,1.3765109288  
C,0,4.3302460411,-1.2619619935,2.9163709896  
C,0,2.2225845527,-0.3899768485,2.1500031111  
C,0,2.9513533429,-2.5526088972,1.4265600521  
C,0,4.1052296256,-2.4166148286,2.1776001525  
C,0,3.3782945139,-0.2531768129,2.9016535532  
H,0,1.4955979953,0.415136555,2.1450272316  
H,0,2.7804631957,-3.4606544195,0.8601095445  
H,0,4.8321473048,-3.2199834363,2.1919532722  
H,0,3.5360799968,0.6515771433,3.4767822399  
H,0,5.2321362252,-1.1562155433,3.5062607468  
O,0,-1.3800026881,-1.6794107284,2.136984784  
H,0,-0.3554065824,-1.9440005953,1.5087175059  
C,0,-1.0870748742,-1.2428773689,3.4455152456  
H,0,-1.7707518641,-0.4400357447,3.7448345903  
H,0,-0.0628434941,-0.8630340631,3.5405142408  
H,0,-1.2023884617,-2.0699014007,4.1538001281  
H,0,-0.3188544626,-2.55634956,-0.9754081855  
C,0,2.8646724174,-1.7265111022,-1.6639046865  
C,0,3.831428852,-1.9556763886,-2.6251892653  
C,0,3.6991888329,-3.0126383104,-3.5186830105  
C,0,1.5971959112,-3.5871977497,2.5096346234  
C,0,2.5757433267,-3.8257214003,-3.4604952314  
H,0,2.9364030115,-0.8782088769,-0.9940631478  
H,0,4.6910408085,-1.2981602159,-2.685337032  
H,0,4.4608985201,-3.191440444,-4.2676213983  
H,0,0.7138261972,-4.2165605613,-2.4710192652  
H,0,2.4587550346,-4.6413256235,-4.1637095614

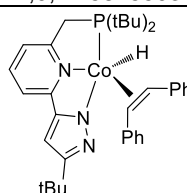



| PNNCo-OCH <sub>3</sub> +cis-Ph-CH=CH-Ph                                                                                                                                                                                                                                                                                                                                                                                                                                                                                                                                                                                                                                                                                                                                                                                                                                                                                                                                                                                                                                                                                                                                                                                                                                                                                                                                                                                                                                                                                                                                                                                                                                                                                                                                                                                                                                                                                                                                                                                                                                                                                                                                                                                                                                                                                                                                                                                                                                                                                                                                                                                                                                                                                                                                                                                                                                                                                                                                                                                                                                                                                                                                                                                                                                                                                                                             | PNNCo-H + cis-Ph-CH=CH-Ph-trigonal bipyramidal                                                                                                                                                                                                                                                                                                                                                                                                                                                                                                                                                                                                                                                                                                                                                                                                                                                                                                                                                                                                                                                                                                                                                                                                                                                                                                                                                                                                                                                                                                                                                                                                                                                                                                                                                                                                                                                                                                                                                                                                                                                                                                                                                                                                                                                                                                                                                                                                                                                                                                                                                                                                                                                                                                                                                                                                                                                                                                                                                                                                                                                                                                                                                                                                                                                                                                                                 |
|---------------------------------------------------------------------------------------------------------------------------------------------------------------------------------------------------------------------------------------------------------------------------------------------------------------------------------------------------------------------------------------------------------------------------------------------------------------------------------------------------------------------------------------------------------------------------------------------------------------------------------------------------------------------------------------------------------------------------------------------------------------------------------------------------------------------------------------------------------------------------------------------------------------------------------------------------------------------------------------------------------------------------------------------------------------------------------------------------------------------------------------------------------------------------------------------------------------------------------------------------------------------------------------------------------------------------------------------------------------------------------------------------------------------------------------------------------------------------------------------------------------------------------------------------------------------------------------------------------------------------------------------------------------------------------------------------------------------------------------------------------------------------------------------------------------------------------------------------------------------------------------------------------------------------------------------------------------------------------------------------------------------------------------------------------------------------------------------------------------------------------------------------------------------------------------------------------------------------------------------------------------------------------------------------------------------------------------------------------------------------------------------------------------------------------------------------------------------------------------------------------------------------------------------------------------------------------------------------------------------------------------------------------------------------------------------------------------------------------------------------------------------------------------------------------------------------------------------------------------------------------------------------------------------------------------------------------------------------------------------------------------------------------------------------------------------------------------------------------------------------------------------------------------------------------------------------------------------------------------------------------------------------------------------------------------------------------------------------------------------|--------------------------------------------------------------------------------------------------------------------------------------------------------------------------------------------------------------------------------------------------------------------------------------------------------------------------------------------------------------------------------------------------------------------------------------------------------------------------------------------------------------------------------------------------------------------------------------------------------------------------------------------------------------------------------------------------------------------------------------------------------------------------------------------------------------------------------------------------------------------------------------------------------------------------------------------------------------------------------------------------------------------------------------------------------------------------------------------------------------------------------------------------------------------------------------------------------------------------------------------------------------------------------------------------------------------------------------------------------------------------------------------------------------------------------------------------------------------------------------------------------------------------------------------------------------------------------------------------------------------------------------------------------------------------------------------------------------------------------------------------------------------------------------------------------------------------------------------------------------------------------------------------------------------------------------------------------------------------------------------------------------------------------------------------------------------------------------------------------------------------------------------------------------------------------------------------------------------------------------------------------------------------------------------------------------------------------------------------------------------------------------------------------------------------------------------------------------------------------------------------------------------------------------------------------------------------------------------------------------------------------------------------------------------------------------------------------------------------------------------------------------------------------------------------------------------------------------------------------------------------------------------------------------------------------------------------------------------------------------------------------------------------------------------------------------------------------------------------------------------------------------------------------------------------------------------------------------------------------------------------------------------------------------------------------------------------------------------------------------------------------|
| <p>Co,0,-0.0887956082,0.4305648849,-0.4188648774<br/> P,0,-0.2555995184,1.1963782984,-2.6801998942<br/> N,0,0.9608916484,2.1888330522,-0.2327769664<br/> C,0,2.4554991027,4.4367161264,0.2372495363<br/> C,0,1.534786304,2.361228541,0.9859669974<br/> C,0,0.9797755528,3.1664747227,-1.1458724029<br/> C,0,1.744806637,4.3067740999,-0.9533024875<br/> C,0,2.3324790287,3.4829445005,1.2265512629<br/> H,0,1.7656381797,5.0822027932,-1.7074417113<br/> H,0,2.8235639448,3.5966929099,2.1833113932<br/> H,0,3.0740577937,5.3102723114,0.4026840988<br/> C,0,0.0331218196,2.9936791619,-2.2986460514<br/> H,0,0.3399649231,3.5736442658,-3.1714282916<br/> H,0,-0.9338580035,3.3866051129,-1.975025168<br/> C,0,-1.9886783015,1.0249731976,-3.4704009452<br/> C,0,1.1209622156,0.8866638598,-3.9631660133<br/> C,0,1.1506424889,-0.6021677455,-4.3039349213<br/> H,0,1.9726950502,-0.8095387066,-4.9935264896<br/> H,0,0.2290903179,-0.9198285778,-4.7949777844<br/> H,0,1.2913063359,-1.2348682776,-3.4282881168<br/> C,0,2.4270422571,1.3271315415,-3.2868872789<br/> H,0,3.2772211188,0.8891978708,-3.8153026835<br/> H,0,2.4947973901,1.0433841298,-2.239206239<br/> H,0,2.5424688671,2.41114666,-3.3310420637<br/> C,0,1.0240519745,1.6922397648,-5.2619205089<br/> H,0,2.0021536068,1.67439895,-5.7496993351<br/> H,0,0.777320687,2.7413607174,-5.091456327<br/> H,0,0.3089951781,1.2851239998,-5.9691106086<br/> C,0,-2.4822048093,-0.3584816041,-3.0368174336<br/> H,0,-1.8355313584,-1.1562529789,-3.4113736038<br/> H,0,-3.4813719263,-0.5340635089,-3.4429178263<br/> H,0,-2.5315714515,-0.4288407812,-1.9504299766<br/> C,0,-2.9223864474,2.0994736538,-2.9135036873<br/> H,0,-2.9024198581,2.1148624543,-1.8256653233<br/> H,0,-3.94114481,1.8741449139,-3.2389516229<br/> H,0,-2.6755766143,3.0891703763,-3.3028781808<br/> C,0,-2.0325387061,1.1106833057,-4.9912694772<br/> H,0,-1.4644058744,0.3193784407,-5.4796218844<br/> H,0,-1.6874916088,2.073300679,-5.3678716053<br/> H,0,-3.0725442981,0.9949481779,-5.3073312796<br/> C,0,1.137528511,1.3668584082,1.9332451877<br/> N,0,0.2614525188,0.4219746226,1.4799077915<br/> C,0,1.2866101738,1.1787830012,3.3087074448<br/> H,0,1.8993459916,1.7490992478,3.9873852213<br/> C,0,0.462759926,0.0953488939,3.59521819<br/> N,0,-0.1485060211,-0.3467174778,2.4686894988<br/> C,0,0.1608161608,-0.5911046602,4.90205352<br/> C,0,1.0497052198,-0.0344269914,6.0088964551<br/> H,0,2.1077578177,-0.1751964802,5.7770318409<br/> H,0,0.8454126456,-0.5391915239,6.9547104706<br/> H,0,0.8794322091,1.0331829368,6.1607050714<br/> C,0,-1.3126325771,-0.3601987165,5.2544511298<br/> H,0,-1.9580744012,-0.7549686645,4.4685705279<br/> H,0,-1.5297010655,0.7040247199,5.3622454781<br/> H,0,-1.5707490379,-0.855948416,6.1932917412<br/> C,0,0.4027578439,-2.0959029216,4.7519163293<br/> H,0,1.450625483,-2.3077477518,4.5302014976<br/> H,0,-0.1987330116,-2.5035117416,3.938837828<br/> H,0,0.1430942735,-2.6234555406,5.6726406664<br/> C,0,-1.8601258538,1.0586939222,-0.2617482936<br/> C,0,1.5967195286,-1.0019970475,-0.6853769908<br/> H,0,1.9712862929,-0.7134407417,-1.6587217107<br/> C,0,0.32183569,-1.5826010897,-0.7135333069<br/> H,0,-0.1023093851,-1.6579107096,-1.7155725182<br/> C,0,2.6546136993,-0.9752330997,0.3235451926<br/> C,0,4.7923820029,-0.7474907082,2.1429148184</p> | <p>Co,0,-0.3062753245,0.5876012464,-0.3204659297<br/> P,0,-0.3585814414,1.2263160769,-2.4822939256<br/> N,0,0.7634691746,2.2819946927,-0.1695210672<br/> C,0,2.3747563562,4.4845706703,0.192982595<br/> C,0,1.4405309973,2.4319147001,1.0009513975<br/> C,0,0.7821769855,3.2565300151,-1.0941509103<br/> C,0,1.5940566071,4.3680875892,-0.9560505787<br/> C,0,2.2812435311,3.5332206974,1.186018112<br/> H,0,1.6044140071,5.1288251214,-1.7249556941<br/> H,0,2.8386395398,3.626196876,2.107989584<br/> H,0,3.0297856409,5.3376211999,0.318254884<br/> C,0,-0.1842330565,3.0519077272,-2.211242333<br/> H,0,0.0738325768,3.6206748274,-3.1033316934<br/> H,0,-1.1655633503,3.3916300686,-1.8687260513<br/> C,0,-1.8941967161,1.0888386109,-3.5942089242<br/> C,0,1.2414729914,0.8301473754,-3.4777461419<br/> C,0,1.0631681172,-0.3937799409,-4.3724396527<br/> H,0,2.0388483707,-0.6880080043,-4.7675375176<br/> H,0,0.4179323506,-0.1938694327,-5.2276837519<br/> H,0,0.6615382861,-1.2541553625,-3.837141363<br/> C,0,2.3362033123,0.5267054181,-2.4501397083<br/> H,0,3.2465674974,0.2276707178,-2.9764969369<br/> H,0,2.0612678633,-0.2854709774,-1.7766079071<br/> H,0,2.5821792231,1.3973151184,-1.8425855287<br/> C,0,1.7090092859,2.0032741255,-4.3385355575<br/> H,0,2.5775065507,1.6885015869,-4.9227297491<br/> H,0,2.0276227723,2.8518533422,-3.7323530836<br/> H,0,0.9534572838,2.3499382274,-5.0429314076<br/> C,0,-2.2067385117,-0.3756739694,-3.9092398103<br/> H,0,-1.4707679704,-0.8389617997,-4.5606282913<br/> H,0,-3.1694472566,-0.4270727438,-4.4232802268<br/> H,0,-2.2924226327,-0.9844539851,-3.0096563249<br/> C,0,-3.0731223347,1.6578719054,-2.8015863851<br/> H,0,-3.1862943483,1.1699337814,-1.833192613<br/> H,0,-3.9899749804,1.5047353855,-3.3754955848<br/> H,0,-2.9809294239,2.7290701091,-2.6227227734<br/> C,0,-1.7414175928,1.8689730723,-4.89694838<br/> H,0,-0.9730062121,1.4487937248,-5.5455505204<br/> H,0,-2.5073232334,2.9210654061,-4.7272342166<br/> H,0,-2.6827681735,1.8342434564,-5.4514847574<br/> C,0,1.1121107972,1.4307982425,1.9576978705<br/> N,0,0.1523056253,0.5333782725,1.5743917677<br/> C,0,1.3997768318,1.2164181688,3.3055298577<br/> H,0,2.0994929829,1.7545128685,3.9236380392<br/> C,0,0.5582065338,0.1696156346,3.6652131793<br/> N,0,-0.1882986312,-0.223657793,2.6073589454<br/> C,0,0.367404123,-0.5164953744,4.9939031062<br/> C,0,1.3440057509,0.0424218837,6.0234575037<br/> H,0,2.3803557491,-0.1055560205,5.7135350057<br/> H,0,1.2105302266,-0.4554594325,6.985405095<br/> H,0,1.1898633657,1.1116447944,6.180953834<br/> C,0,-1.0703648455,-0.2895561057,5.4709568911<br/> H,0,-1.7805080602,-0.671670001,4.7371424648<br/> H,0,-1.273857946,0.7731345817,5.6138164039<br/> H,0,-1.2469098622,-0.7987688153,6.4215308793<br/> C,0,0.604002256,-2.0202063853,4.8264074336<br/> H,0,1.6259464685,-2.2205021421,4.4991349326<br/> H,0,-0.0796238314,-2.4380532204,4.0853124169<br/> H,0,0.4446007911,-2.544589191,5.7714600193<br/> H,0,-1.6474298624,1.3123073845,-0.1729123989<br/> C,0,-0.2629233643,-1.5573674752,-0.8824951194<br/> H,0,-0.2358325834,-1.5194046709,-1.9693952285<br/> C,0,-1.4927874187,-1.1562287983,-0.334861865<br/> H,0,-2.2153585419,-0.8314803299,-1.0777742458<br/> C,0,0.8665605586,-2.3170649168,-0.3553152616<br/> C,0,3.1078487411,-3.8246590222,0.4493546427</p> |

|                                                                                                                                                                                                                                                                                                                                                                                                                                                                                                                                                                                                                                                                                                                                                                                                                                                                                                                                                                                                                                                                                                                                                                                                                                                                                                                                                                                                                                                                                                                                                                                                                                                                                                                                                                                                                                             |                                                                                                                                                                                                                                                                                                                                                                                                                                                                                                                                                                                                                                                                                                                                                                                                                                                                                                                                                                                                                                                                                                                                                                                                                                                                                                                                                                                                                                                                                                                                                                                                                                                                                                                                                                                                                                         |
|---------------------------------------------------------------------------------------------------------------------------------------------------------------------------------------------------------------------------------------------------------------------------------------------------------------------------------------------------------------------------------------------------------------------------------------------------------------------------------------------------------------------------------------------------------------------------------------------------------------------------------------------------------------------------------------------------------------------------------------------------------------------------------------------------------------------------------------------------------------------------------------------------------------------------------------------------------------------------------------------------------------------------------------------------------------------------------------------------------------------------------------------------------------------------------------------------------------------------------------------------------------------------------------------------------------------------------------------------------------------------------------------------------------------------------------------------------------------------------------------------------------------------------------------------------------------------------------------------------------------------------------------------------------------------------------------------------------------------------------------------------------------------------------------------------------------------------------------|-----------------------------------------------------------------------------------------------------------------------------------------------------------------------------------------------------------------------------------------------------------------------------------------------------------------------------------------------------------------------------------------------------------------------------------------------------------------------------------------------------------------------------------------------------------------------------------------------------------------------------------------------------------------------------------------------------------------------------------------------------------------------------------------------------------------------------------------------------------------------------------------------------------------------------------------------------------------------------------------------------------------------------------------------------------------------------------------------------------------------------------------------------------------------------------------------------------------------------------------------------------------------------------------------------------------------------------------------------------------------------------------------------------------------------------------------------------------------------------------------------------------------------------------------------------------------------------------------------------------------------------------------------------------------------------------------------------------------------------------------------------------------------------------------------------------------------------------|
| <p>C,0,3.850217571,-0.3256394323,-0.0225995457<br/> C,0,2.5708770222,-1.523023129,1.6109160526<br/> C,0,3.623192459,-1.4047420777,2.5012220425<br/> C,0,4.9012346375,-0.2084498357,0.8690505069<br/> H,0,3.9468290094,0.0998984255,-1.0157121382<br/> H,0,1.661261876,-2.0085912868,1.931738447<br/> H,0,3.5244395082,-1.8259873735,3.4949637447<br/> H,0,5.8073014583,0.3035211797,0.5681769955<br/> H,0,5.6097478108,-0.6589626889,2.8476992253<br/> C,0,-0.3263603774,-2.5233082288,0.2262817299<br/> C,0,-1.6393538995,-4.38193136,1.8519349529<br/> C,0,0.3319934643,-3.6699360126,0.6728242161<br/> C,0,-1.6615031005,-2.3372108066,0.5899138893<br/> C,0,-2.3092147265,-3.2525685161,1.4004342805<br/> C,0,-0.3188085055,-4.5900442615,1.4808916<br/> H,0,1.3613853324,-3.8392232892,0.3789353615<br/> H,0,-2.1705950131,-1.4376574879,0.2579660396<br/> H,0,-3.3390319147,-3.0803040805,1.6889679795<br/> H,0,0.2084128328,-5.4735606927,1.8200615077<br/> H,0,-2.1441466164,-5.0971445092,2.4896867991<br/> C,0,-2.4270216669,1.4105643812,0.9604567986<br/> H,0,-1.882200859,2.2254978465,1.462278772<br/> H,0,-3.4556184457,1.762415572,0.7967368487<br/> H,0,-2.4677281199,0.5762303012,1.6751757916</p>                                                                                                                                                                                                                                                                                                                                                                                                                                                                                                                                                                                                                        | <p>C,0,1.7559104817,-2.8758795883,-1.2909549527<br/> C,0,1.1428594815,-2.5356799526,1.0037842425<br/> C,0,2.2452576878,-3.2758296219,1.3906259606<br/> C,0,2.8536544461,-3.6203010646,-0.8994171337<br/> H,0,1.5642047427,-2.7254625301,-2.3488926189<br/> H,0,0.4943124987,-2.1050479255,1.7541766775<br/> H,0,2.4323752374,-3.4280659546,2.4467828132<br/> H,0,3.5119611574,-4.0423286667,-1.6492442987<br/> H,0,3.9665267412,-4.4046947833,0.7636394821<br/> C,0,-2.1625294858,-1.6064257034,0.8972037805<br/> C,0,-3.5847494788,-2.4718266468,3.1479710131<br/> C,0,-1.9934676458,-2.8983558528,1.3952571<br/> C,0,-3.0846492367,-0.768407824,1.5287807332<br/> C,0,-3.7859497384,-1.1934045362,2.6411677595<br/> C,0,-2.6927776104,-3.3238172444,2.5147039924<br/> H,0,-1.3128398935,-3.5770686419,0.8964094095<br/> H,0,-3.207085041,0.2407965231,1.1509466045<br/> H,0,-4.4835789691,-0.5217913388,3.1271397615<br/> H,0,-2.5423809,-4.329085325,2.8900858398<br/> H,0,-4.1248455907,-2.8022384371,4.0268842332</p>                                                                                                                                                                                                                                                                                                                                                                                                                                                                                                                                                                                                                                                                                                                                                                                                              |
| 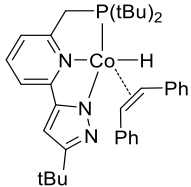 <p><b>PNNCo-H + cis-Ph-CH=CH-Ph-tetragonal pyramidal</b></p>                                                                                                                                                                                                                                                                                                                                                                                                                                                                                                                                                                                                                                                                                                                                                                                                                                                                                                                                                                                                                                                                                                                                                                                                                                                                                                                                                                                                                                                                                                                                                                                                                                                                                             |  <p><b>TS3</b></p>                                                                                                                                                                                                                                                                                                                                                                                                                                                                                                                                                                                                                                                                                                                                                                                                                                                                                                                                                                                                                                                                                                                                                                                                                                                                                                                                                                                                                                                                                                                                                                                                                                                                                                                                   |
| <p>Co,0,0.6907259336,0.9154215479,-0.1487074984<br/> P,0,1.7227017394,0.5813177644,-2.0551046195<br/> N,0,1.9621983791,-0.4746755151,0.5331337571<br/> C,0,3.6897199437,-2.2783441299,1.6849440516<br/> C,0,2.060247075,-0.5380519483,1.8905333225<br/> C,0,2.7202255043,-1.2593436175,-0.2475867667<br/> C,0,3.601008527,-2.1796172191,0.2999697781<br/> C,0,2.9251071984,-1.4563492446,2.4869742224<br/> H,0,4.2030880937,-2.80400763,-0.3464563829<br/> H,0,2.9835286393,-1.5097390247,3.565568188<br/> H,0,4.3643955458,-2.9973732801,2.132906707<br/> C,0,2.5512334949,-1.0623156442,-1.7252348268<br/> H,0,1.8769890546,-1.8298816467,-2.1211571864<br/> H,0,3.4987442778,-1.1884543415,-2.2559377065<br/> C,0,3.159880191,1.8285261031,-2.1450611812<br/> C,0,0.9522332447,0.3186873335,-3.7699273829<br/> C,0,0.5482144812,1.668873792,-4.3545968281<br/> H,0,-0.0682404167,1.512396847,-5.2430022619<br/> H,0,1.4112836317,2.2597950362,-4.6611624409<br/> H,0,-0.0352725486,2.2567910124,-3.6437406437<br/> C,0,-0.3114875996,-0.510360166,-3.5450751209<br/> H,0,-0.8185851521,-0.6679786833,-4.4999781719<br/> H,0,-1.0092826296,-0.0088923105,-2.8755541534<br/> H,0,-0.0932465171,-1.4979344954,-3.1338930976<br/> C,0,1.8526726154,-0.4361314012,-4.7452776709<br/> H,0,1.3120716167,-0.5900301661,-5.6828590983<br/> H,0,2.1258961977,-1.4238687675,-4.3722209152<br/> H,0,2.7681008023,0.0983341827,-4.9856434975<br/> C,0,2.5775995313,3.2422010954,-2.1082096917<br/> H,0,2.0141091171,3.4901833069,-3.0057492294<br/> H,0,3.3923923219,3.9653993555,-2.0222669506<br/> H,0,1.9126742142,3.3737303308,-1.253385534<br/> C,0,3.9874282967,1.6322020368,-0.8718850281<br/> H,0,3.3854916941,1.7602750431,0.0301605636<br/> H,0,4.7809042602,2.382651527,-0.8466016947<br/> H,0,4.4651737737,0.6523232553,-0.8239454063</p> | <p>Co,0,0.6333066787,0.9232217862,-0.1374652442<br/> P,0,1.819273672,0.6518751082,-2.0429108688<br/> N,0,1.7317329019,-0.6093403435,0.4794681548<br/> C,0,3.1054679718,-2.7455966942,1.5431285209<br/> C,0,1.8018765365,-0.7588204263,1.8334875201<br/> C,0,2.382462212,-1.4540786523,-0.3350896124<br/> C,0,3.0790349434,-2.5415557786,0.1668063962<br/> C,0,2.4789356025,-1.8497244559,2.3820745598<br/> H,0,3.5933990295,-3.2103597332,-0.5100337888<br/> H,0,2.5114057616,-1.9660516228,3.4566002794<br/> H,0,3.6353915607,-3.5958256998,1.9541266387<br/> C,0,2.3308109832,-1.1263316555,-1.7953731016<br/> H,0,1.5557435471,-1.7288492381,-2.2808369282<br/> H,0,3.2721240813,-1.3846592035,-2.2879760451<br/> C,0,3.4414162801,1.65093534,-1.909351449<br/> C,0,1.2180268212,0.6188289316,-3.8502957113<br/> C,0,1.0579529231,2.0501839091,-4.3540830604<br/> H,0,0.5371164112,2.0461553025,-5.3146372436<br/> H,0,2.0174365345,2.543033268,-4.5098448492<br/> H,0,0.4714109874,2.659561424,-3.6630105282<br/> C,0,-0.1586102643,-0.0480239499,-3.8420848292<br/> H,0,-0.5435329128,-0.0910162607,-4.863944065<br/> H,0,-0.8803882972,0.5031379463,-3.2419702026<br/> H,0,-0.1235797122,-1.0739432759,-3.4716235923<br/> C,0,2.1129815289,-0.1795856126,-4.79646535<br/> H,0,1.6574076314,-0.1910929707,-5.7903774051<br/> H,0,2.2140528831,-1.2195596152,-4.4840451006<br/> H,0,3.1096925729,0.2385450652,-4.9043715502<br/> C,0,3.0707202308,3.1288072488,-1.7745725987<br/> H,0,2.594791976,3.5299176859,-2.6681181013<br/> H,0,3.9751782177,3.7148797419,-1.5939446945<br/> H,0,2.3938157885,3.2887945267,-0.9332386687<br/> C,0,4.125422448,1.225447455,-0.6076598751<br/> H,0,3.4784623037,1.3674778339,0.2595574318<br/> H,0,5.0140290186,1.8435733961,-0.4595380626<br/> H,0,4.4533442144,0.1847465259,-0.6234131725</p> |

|                                                                                                                                                                                                                                                                                                                                                                                                                                                                                                                                                                                                                                                                                                                                                                                                                                                                                                                                                                                                                                                                                                                                                                                                                                                                                                                                                                                                                                                                                                                                                                                                                                                                                                                                                                                                                                                                                                                                                                                                                                                                                                                                                                                                                                                                                                                                                                                                                                                                                                                                                 |                                                                                                                                                                                                                                                                                                                                                                                                                                                                                                                                                                                                                                                                                                                                                                                                                                                                                                                                                                                                                                                                                                                                                                                                                                                                                                                                                                                                                                                                                                                                                                                                                                                                                                                                                                                                                                                                                                                                                                                                                                                                                                                                                                                                                                                                                                                                                                                                                                                                                                                                             |
|-------------------------------------------------------------------------------------------------------------------------------------------------------------------------------------------------------------------------------------------------------------------------------------------------------------------------------------------------------------------------------------------------------------------------------------------------------------------------------------------------------------------------------------------------------------------------------------------------------------------------------------------------------------------------------------------------------------------------------------------------------------------------------------------------------------------------------------------------------------------------------------------------------------------------------------------------------------------------------------------------------------------------------------------------------------------------------------------------------------------------------------------------------------------------------------------------------------------------------------------------------------------------------------------------------------------------------------------------------------------------------------------------------------------------------------------------------------------------------------------------------------------------------------------------------------------------------------------------------------------------------------------------------------------------------------------------------------------------------------------------------------------------------------------------------------------------------------------------------------------------------------------------------------------------------------------------------------------------------------------------------------------------------------------------------------------------------------------------------------------------------------------------------------------------------------------------------------------------------------------------------------------------------------------------------------------------------------------------------------------------------------------------------------------------------------------------------------------------------------------------------------------------------------------------|---------------------------------------------------------------------------------------------------------------------------------------------------------------------------------------------------------------------------------------------------------------------------------------------------------------------------------------------------------------------------------------------------------------------------------------------------------------------------------------------------------------------------------------------------------------------------------------------------------------------------------------------------------------------------------------------------------------------------------------------------------------------------------------------------------------------------------------------------------------------------------------------------------------------------------------------------------------------------------------------------------------------------------------------------------------------------------------------------------------------------------------------------------------------------------------------------------------------------------------------------------------------------------------------------------------------------------------------------------------------------------------------------------------------------------------------------------------------------------------------------------------------------------------------------------------------------------------------------------------------------------------------------------------------------------------------------------------------------------------------------------------------------------------------------------------------------------------------------------------------------------------------------------------------------------------------------------------------------------------------------------------------------------------------------------------------------------------------------------------------------------------------------------------------------------------------------------------------------------------------------------------------------------------------------------------------------------------------------------------------------------------------------------------------------------------------------------------------------------------------------------------------------------------------|
| <p>C,0,4.0698865134,1.6641693779,-3.3552105925<br/> H,0,3.569912145,1.9232155745,-4.2881944043<br/> H,0,4.4647103347,0.6504272353,-3.4475496792<br/> H,0,4.9275231956,2.334801633,-3.2563446371<br/> C,0,1.2077238615,0.3941859872,2.5586859361<br/> N,0,0.4148094116,1.1690156144,1.7571759446<br/> C,0,0.8854140584,0.6616574363,3.885868197<br/> H,0,1.3098392844,0.2152365741,4.7708167214<br/> C,0,-0.1315208788,1.6113291214,3.7992112489<br/> N,0,-0.3966027994,1.9130065714,2.5079127469<br/> C,0,-0.9815467712,2.1868600134,4.9028145229<br/> C,0,-0.1837742734,2.2774873529,6.201677089<br/> H,0,0.1603598292,1.2955737087,6.5319554731<br/> H,0,-0.8003619032,2.6926823447,7.0014278629<br/> H,0,0.6927730714,2.9169726526,6.0861492459<br/> C,0,-1.4930369656,3.5721448887,4.513585707<br/> H,0,-2.0611062074,3.5273450459,3.5852689668<br/> H,0,-0.6680572817,4.2690577868,4.3600642828<br/> H,0,-2.1371068669,3.9736815103,5.2991024968<br/> C,0,-2.1791278706,1.247724548,5.1068789288<br/> H,0,-1.8479696036,0.2514758122,5.4061235691<br/> H,0,-2.7498466497,1.148300107,4.1818890654<br/> H,0,-2.8496541962,1.6279118101,5.8824146122<br/> H,0,-0.1813693965,2.0584906446,-0.6348598487<br/> C,0,-1.0243753131,-1.3251691973,-0.0368548122<br/> C,0,-1.8709418563,-0.2811271955,-0.1537822778<br/> H,0,-1.8457553106,0.2466659915,-1.1024384<br/> C,0,-2.8906412767,0.2221943252,0.7686702032<br/> C,0,-4.9620600138,1.2238187485,2.3572631241<br/> C,0,-3.7633788147,-0.6439548847,1.4344317571<br/> C,0,-3.0788301436,1.5997686477,0.9095504856<br/> C,0,-4.1015146329,2.0936968032,1.7022245766<br/> C,0,-4.7890123567,-0.147709659,2.220819823<br/> H,0,-3.6391349309,-1.714222879,1.3168384412<br/> H,0,-2.3871702352,2.2726939111,0.4166501211<br/> H,0,-4.2250109659,3.1641292506,1.8121233646<br/> H,0,-5.4616224228,-0.8328204431,2.7222470844<br/> H,0,-5.7639766523,1.6118649803,2.9733072993<br/> H,0,-0.4695116253,-1.5840819124,-0.9368817792<br/> C,0,-0.7083035301,-2.1740344949,1.1056838204<br/> C,0,0.0661059793,-3.8462098046,3.2229656699<br/> C,0,-0.0309650349,-3.3781971066,0.8715629266<br/> C,0,-0.9630213505,-1.8150115543,2.4355677662<br/> C,0,-0.581093733,-2.643276173,3.4759071561<br/> C,0,0.3444159079,-4.2095108366,1.912574201<br/> H,0,0.2008635456,-3.6569331854,-0.1519667598<br/> H,0,-1.4265981046,-0.8614887229,2.6569930461<br/> H,0,-0.7752680973,-2.3340551217,4.496100506<br/> H,0,0.8634814701,-5.1368493637,1.7024722983<br/> H,0,0.3619786942,-4.4899089971,4.0422047787</p> | <p>C,0,4.4205507149,1.4583711134,-3.0598098675<br/> H,0,4.0482878823,1.8697086027,-3.9975561346<br/> H,0,4.6736374919,0.4088684181,-3.2216085187<br/> H,0,5.3531412066,1.9811502629,-2.8312225882<br/> C,0,1.1715803036,0.2983091009,2.5556113849<br/> N,0,0.6424118502,1.3024119521,1.7974329169<br/> C,0,0.9052728648,0.5687814329,3.8962668128<br/> H,0,1.172329224,-0.0228738248,4.7565754507<br/> C,0,0.184243778,1.7602763071,3.8590278198<br/> N,0,0.0396834282,2.1915016714,2.5853758529<br/> C,0,-0.4730005903,2.5311895065,4.974898745<br/> C,0,-0.1032948243,4.0118508395,4.8689189987<br/> H,0,0.9727098995,4.1588772885,4.9757195559<br/> H,0,-0.6032341291,4.590909701,5.6488259084<br/> H,0,-0.3988147435,4.4100526314,3.8981359645<br/> C,0,-1.9925881974,2.3845816122,4.8270280021<br/> H,0,-2.2959205166,1.3393995828,4.9156325852<br/> H,0,-2.3193011937,2.7431728871,3.849807747<br/> H,0,-2.5179325913,2.9539460301,5.5987234284<br/> C,0,-0.0387036623,1.9851213723,6.3309375839<br/> H,0,1.0421384531,2.0596818529,6.4647188629<br/> H,0,-0.3193718112,0.9361590767,6.4468762382<br/> H,0,-0.5146113923,2.5437909165,7.1388980125<br/> H,0,-0.1581441669,2.1490670422,-0.529873105<br/> C,0,-1.1350589512,-0.2033339786,-0.4324496456<br/> C,0,-1.4167964458,1.1788895531,-0.616203427<br/> H,0,-1.514926334,1.4458706531,-1.6689835527<br/> C,0,-2.3829666119,1.9683140849,0.2089065636<br/> C,0,-4.3377340745,3.4534018951,1.5471721072<br/> C,0,-3.660503383,1.4445060354,0.4152136629<br/> C,0,-2.1023736658,3.2457089,0.6833899114<br/> C,0,-3.0721171176,3.9834277039,1.3450942327<br/> C,0,-4.6287352862,2.1789033626,1.0808453177<br/> H,0,-3.8861036572,0.4467204489,0.0562851594<br/> H,0,-1.1026161445,3.6447541603,0.56660488<br/> H,0,-2.8300908013,4.9708465199,1.7194551385<br/> H,0,-5.6124017267,1.75319921,1.2368963447<br/> H,0,-5.0917810395,4.0268702479,2.0722307439<br/> H,0,-0.9782050458,-0.7675738073,-1.3468630899<br/> C,0,-1.4117882476,-1.0652735589,0.7124152557<br/> C,0,-1.8148510043,-2.8934698529,2.8199171954<br/> C,0,-1.2603184897,-2.4494358061,0.5269455594<br/> C,0,-1.7660398829,-0.6244718405,1.9969650862<br/> C,0,-1.9649916755,-1.5287525923,3.0264235554<br/> C,0,-1.4570833388,-3.3497178169,1.5581108166<br/> H,0,-0.97832208,-2.8131823369,-0.4571343616<br/> H,0,-1.8536652831,0.4350396444,2.2020216229<br/> H,0,-2.2257715244,-1.1562638211,4.0101517778<br/> H,0,-1.3312324895,-4.4107213784,1.377431455<br/> H,0,-1.9699898448,-3.5920768122,3.6326093309</p> |
| 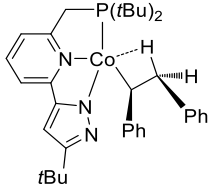 <p><b>PNNCo-cis-Ph-C-CHPh-H-agostic</b></p>                                                                                                                                                                                                                                                                                                                                                                                                                                                                                                                                                                                                                                                                                                                                                                                                                                                                                                                                                                                                                                                                                                                                                                                                                                                                                                                                                                                                                                                                                                                                                                                                                                                                                                                                                                                                                                                                                                                                                                                                                                                                                                                                                                                                                                                                                                                                                                                                                 |  <p><b>PNNCo-cis-Ph-C-CH2-Ph</b></p>                                                                                                                                                                                                                                                                                                                                                                                                                                                                                                                                                                                                                                                                                                                                                                                                                                                                                                                                                                                                                                                                                                                                                                                                                                                                                                                                                                                                                                                                                                                                                                                                                                                                                                                                                                                                                                                                                                                                                                                                                                                                                                                                                                                                                                                                                                                                                                                                                    |
| <p>Co,0,0.0127940073,0.1125229097,-0.5431304136<br/> P,0,1.6917667163,0.583626364,-1.9976038857<br/> N,0,1.3170973148,-1.1888749081,0.0831657394<br/> C,0,3.0399969022,-3.0524111087,1.1214540171<br/> C,0,1.4167709207,-1.3163749815,1.4380003966<br/> C,0,2.2059518461,-1.7916365054,-0.7266415418<br/> C,0,3.0683120801,-2.7571648596,-0.2436938564<br/> C,0,2.2492626111,-2.3093406599,1.9695479659<br/> H,0,3.7663648005,-3.2446322858,-0.9107071183<br/> H,0,2.2934749279,-2.4432893856,3.041829212</p>                                                                                                                                                                                                                                                                                                                                                                                                                                                                                                                                                                                                                                                                                                                                                                                                                                                                                                                                                                                                                                                                                                                                                                                                                                                                                                                                                                                                                                                                                                                                                                                                                                                                                                                                                                                                                                                                                                                                                                                                                                   | <p>Co,0,0.8498360059,-0.7916590369,0.1457146474<br/> P,0,1.9158730901,-0.8578811614,-1.8274676903<br/> N,0,2.7300272143,-0.4531456894,0.8525538233<br/> C,0,5.1369513338,0.4105140808,1.8979160545<br/> C,0,2.7789161472,0.0527385852,2.1168401827<br/> C,0,3.8468160088,-0.5037287824,0.1066038495<br/> C,0,5.0697068064,-0.071842382,0.5945128363<br/> C,0,3.9931264712,0.4727469411,2.6648885303<br/> H,0,5.9497529301,-0.1219602844,-0.0324943257<br/> H,0,4.0122055506,0.8665307573,3.6718619279</p>                                                                                                                                                                                                                                                                                                                                                                                                                                                                                                                                                                                                                                                                                                                                                                                                                                                                                                                                                                                                                                                                                                                                                                                                                                                                                                                                                                                                                                                                                                                                                                                                                                                                                                                                                                                                                                                                                                                                                                                                                                   |

H,0,3.6909200917,-3.8201343082,1.5208918238  
C,0,2.2587036198,-1.2108912057,-2.1051724945  
H,0,1.5439530358,-1.7000927512,-2.7751301666  
C,0,3.2479850296,-1.341913591,-2.5506196818  
H,0,3.1983862729,1.5872131161,-1.4241817915  
C,0,1.2788941072,0.9413795881,-3.8185835321  
C,0,1.156161417,2.4448453398,-4.0473762292  
H,0,0.7336951266,2.6307202324,-5.0379117056  
H,0,2.1206911274,2.9504236605,-4.0082332253  
H,0,0.4956131203,2.9142253478,-3.3154260701  
C,0,-0.0930922115,0.3075842879,-4.0632423025  
H,0,0.358950931,0.4011536685,-5.1190979181  
H,0,-0.8695729516,0.8028936232,-3.481042304  
H,0,-0.1177796227,-0.7563129807,-3.8153951061  
C,0,2.2774809055,0.3408944935,-4.8058627628  
H,0,1.9706668911,0.5900239893,-5.8251735122  
H,0,2.3131569928,-0.7468654005,-4.742400998  
H,0,3.288635831,0.7186884788,-4.6706927416  
C,0,2.6952676684,2.9852296268,-1.0570410833  
H,0,2.3515170454,3.553378909,-1.9197742671  
H,0,3.5092576461,3.5508787216,-0.597338762  
H,0,1.8788985268,2.9298520592,-0.3337980991  
C,0,3.7066391844,0.9315210437,-0.138116887  
H,0,2.9196700279,0.8637553067,0.6148626735  
H,0,4.5073386609,1.5492892409,0.2756104105  
H,0,4.1177591453,-0.065060493,-0.305485255  
C,0,4.3341247021,1.6693282005,-2.434532398  
H,0,4.0584144202,2.2298437193,-3.3277568699  
H,0,4.685047234,0.6829390795,-2.7444583172  
H,0,5.1860860873,2.185243328,-1.9834868302  
C,0,0.7642339543,-0.2701171663,2.152649184  
N,0,0.2885247223,0.7665778917,1.3917703917  
C,0,0.612441043,0.0597573267,3.5021114089  
H,0,0.8725828459,-0.5362689625,4.3615367466  
C,0,0.0180615979,1.3130965482,3.4741764592  
N,0,-0.1641386101,1.7269124277,2.1914643885  
C,0,-0.3983781983,2.2095603434,4.6119932061  
C,0,0.5393793246,3.4203262277,4.6701584552  
H,0,1.5707257597,3.1098112223,4.8465932151  
H,0,0.2488018344,4.1005645091,5.4748018027  
H,0,0.5122697645,3.970803192,3.7294430555  
C,0,-1.8281240196,2.701476624,4.3742345059  
H,0,-2.5340469497,1.8690727469,4.3473327988  
H,0,-1.9006051014,3.2221341129,3.4198765257  
H,0,-2.1413737573,3.3830447209,5.1687453576  
C,0,-0.3314715636,1.4517502053,5.9342741009  
H,0,0.6850041284,1.119590063,6.1540213196  
H,0,-0.9746792639,0.5693505446,5.9184317176  
H,0,-0.6556424786,2.0892618839,6.7590769647  
H,0,-1.0938048868,1.2166448658,-1.0745223162  
C,0,-1.7496420813,-0.7855745339,-0.2847946725  
C,0,-2.096478617,-1.2905721029,1.036679481  
C,0,-2.071936211,0.5382468787,-0.8844158374  
H,0,-2.3887835658,0.3922532914,-1.9215767379  
C,0,-3.0084668039,1.5015201879,-0.2112878651  
H,0,-1.7212615294,-1.5854010163,-1.0286461061  
C,0,-2.5673610783,2.7090011847,0.3166268389  
C,0,-3.4648678789,3.5762120954,0.9240939497  
C,0,-4.8082877585,3.2455996385,1.0094821107  
C,0,-4.3620875083,1.1774784891,-0.1301798759  
C,0,-5.2555174389,2.0422589497,0.4785556874  
H,0,-1.5090733217,2.9441228047,0.3001353178  
H,0,-3.1069281849,4.5086218965,1.3432529937  
H,0,-5.5058457905,3.9200870061,1.4903049078  
H,0,-4.7073055514,0.2298524638,-0.5291153196  
H,0,-6.3031376068,1.7752895279,0.5437814236  
C,0,-2.5066653238,-0.5084741572,2.1278555458  
C,0,-2.7345827378,-1.0848979342,3.3653595122

H,0,6.0830460034,0.7464901182,2.3037516781  
C,0,3.6768641664,-1.0835339199,-1.2603308393  
H,0,3.8311712001,-2.1627172281,-1.1954508403  
H,0,4.4217912602,-0.7031643154,-1.9613218306  
C,0,1.8485294829,0.949644366,-2.4461471997  
C,0,1.8147462361,-2.0712484568,-3.2974671123  
C,0,0.3570004835,-2.2614869664,-3.7206924776  
H,0,-0.1295302602,-1.3331756394,-4.0135585355  
H,0,-0.2401479831,-2.7151021523,-2.9309687538  
H,0,0.3228919983,-2.9339630007,-4.581494084  
C,0,2.345333099,-3.4248224624,-2.812012093  
H,0,2.0369928108,-4.2017888471,-3.5146794809  
H,0,1.9580415745,-3.7009863338,-1.8297093745  
H,0,3.4339069062,-3.4499422421,-2.7668804441  
C,0,2.6430724744,-1.6346142737,-4.5019573568  
H,0,2.6400739673,-2.4343769202,-5.2474292251  
H,0,3.6850267484,-1.4405374205,-4.2420424772  
H,0,2.239887282,-0.7462856644,-4.9868197873  
C,0,0.6267638595,1.1200165562,-3.3464210274  
H,0,0.7438894082,0.628383526,-4.3118162575  
H,0,0.4658301102,2.1828019093,-3.542521703  
H,0,-0.2801080978,0.7360243105,-2.8725001071  
C,0,1.6399947835,1.8216540631,-1.2020036359  
H,0,0.7381073193,1.5427749676,-0.6472441984  
H,0,1.5158715307,2.8627973345,-1.5112554214  
H,0,2.487118868,1.7836116396,-0.5171509544  
C,0,3.1106249214,1.4296661779,-3.1545849161  
H,0,3.3492785886,0.8570398639,-4.0480533417  
H,0,3.978186414,1.4083058875,-2.4932322755  
H,0,2.9752671755,2.4697363624,-3.4625056079  
C,0,1.4994950986,0.1532364114,2.7405127066  
N,0,0.4216160598,-0.1791434583,1.9715853494  
C,0,1.0433223049,0.5750283782,3.9887089939  
H,0,1.6306592398,0.9012270146,4.831420866  
C,0,-0.3406822448,0.4660254306,3.8922962894  
N,0,-0.6938761112,0.0156597348,2.6691417569  
C,0,-1.4168735432,0.7758673721,4.9015308027  
C,0,-2.279253398,1.9289300902,4.3781138246  
H,0,-1.6860126324,2.8346898956,4.2417329948  
H,0,-3.0883936741,2.1567523128,5.0760140536  
H,0,-2.720102828,1.6715532973,3.4142456073  
C,0,-2.301278579,-0.4597686773,5.0922506285  
H,0,-1.7196356873,-1.3105596352,5.4510871331  
H,0,-2.7637619088,-0.7504422455,4.1483388784  
H,0,-3.094477582,-0.2598032861,5.816329159  
C,0,-0.7953390243,1.1706637546,6.2372812963  
H,0,-0.1707921076,2.0607921416,6.140043919  
H,0,-0.1757266349,0.3683097502,6.6420718138  
H,0,-1.5731306194,1.39187534,6.9702025004  
C,0,-1.0345597368,-1.1445772752,-0.4583365261  
H,0,-0.9926789765,-1.3724173596,-1.5250313577  
C,0,-2.0077058296,-0.0016964289,-0.2231766061  
H,0,-1.6464398723,0.8738150434,-0.7778188114  
H,0,-2.0036158925,0.2866029076,0.8293479641  
C,0,-3.4171992061,-0.2992317449,-0.6676793525  
C,0,-6.0348065113,-0.8687410791,-1.4960487765  
C,0,-3.6978936208,-0.6129827104,-1.9978016403  
C,0,-4.4762234315,-0.2770192558,0.2364893932  
C,0,-5.7727165563,-0.5590438257,-0.170120827  
C,0,-4.9905526398,-0.8924145328,-2.4110450277  
H,0,-2.8856442613,-0.6352671033,-2.7191967734  
H,0,-4.274229604,-0.0317658282,1.2748724426  
H,0,-6.5805486213,-0.5376357159,0.5516259699  
H,0,-5.1866116238,-1.1299287864,-3.4500469807  
H,0,-7.0456339426,-1.0894913813,-1.8160624729  
C,0,-1.2110691522,-2.3933698822,0.3084960612  
C,0,-1.3321091842,-4.7902029251,1.7962526243  
C,0,-0.51611553,-3.5484846277,-0.0901277515

|                                                                                                                                                                                                                                                                                                                                                                                                                                                                                                                                                                                                                                                                                                                                                                                                                                                                                                                                                                                                                                                                                                                                                                                                                                                                                                                                                                                                                                                                                                                                                                                                                                                                                                                                                                                                                                                                                                                                                                                                                                                                                                                                                                                                                                                                                                                                                                                                                                                                                                                                                                                                      |                                                                                                                                                                                                                                                                                                                                                                                                                                                                                                                                                                                                                                                                                                                                                                                                                                                                                                                                                                                                                                                                                                                                                                                                                                                                                                                                                                                                                                                                                                                                                                                                                                                                                                                                                                                                                                                                                                                                                                                                                                                                                                                                                                                                                                                                                                                                                                                                                                                                                                                                                                                                                            |
|------------------------------------------------------------------------------------------------------------------------------------------------------------------------------------------------------------------------------------------------------------------------------------------------------------------------------------------------------------------------------------------------------------------------------------------------------------------------------------------------------------------------------------------------------------------------------------------------------------------------------------------------------------------------------------------------------------------------------------------------------------------------------------------------------------------------------------------------------------------------------------------------------------------------------------------------------------------------------------------------------------------------------------------------------------------------------------------------------------------------------------------------------------------------------------------------------------------------------------------------------------------------------------------------------------------------------------------------------------------------------------------------------------------------------------------------------------------------------------------------------------------------------------------------------------------------------------------------------------------------------------------------------------------------------------------------------------------------------------------------------------------------------------------------------------------------------------------------------------------------------------------------------------------------------------------------------------------------------------------------------------------------------------------------------------------------------------------------------------------------------------------------------------------------------------------------------------------------------------------------------------------------------------------------------------------------------------------------------------------------------------------------------------------------------------------------------------------------------------------------------------------------------------------------------------------------------------------------------|----------------------------------------------------------------------------------------------------------------------------------------------------------------------------------------------------------------------------------------------------------------------------------------------------------------------------------------------------------------------------------------------------------------------------------------------------------------------------------------------------------------------------------------------------------------------------------------------------------------------------------------------------------------------------------------------------------------------------------------------------------------------------------------------------------------------------------------------------------------------------------------------------------------------------------------------------------------------------------------------------------------------------------------------------------------------------------------------------------------------------------------------------------------------------------------------------------------------------------------------------------------------------------------------------------------------------------------------------------------------------------------------------------------------------------------------------------------------------------------------------------------------------------------------------------------------------------------------------------------------------------------------------------------------------------------------------------------------------------------------------------------------------------------------------------------------------------------------------------------------------------------------------------------------------------------------------------------------------------------------------------------------------------------------------------------------------------------------------------------------------------------------------------------------------------------------------------------------------------------------------------------------------------------------------------------------------------------------------------------------------------------------------------------------------------------------------------------------------------------------------------------------------------------------------------------------------------------------------------------------------|
| <p>C,0,-2.5592525524,-2.4469312129,3.5654610231<br/> C,0,-1.929997099,-2.6687436203,1.2592179544<br/> C,0,-2.1508097255,-3.2377740476,2.4992649961<br/> H,0,-2.6092239688,0.562217991,2.0239329001<br/> H,0,-3.0420841169,-0.4541313609,4.1914737548<br/> H,0,-2.7362726052,-2.8864285365,4.5391759559<br/> H,0,-1.6030926494,-3.2917009759,0.4322774964<br/> H,0,-2.006227008,-4.3031185434,2.6347026645</p>                                                                                                                                                                                                                                                                                                                                                                                                                                                                                                                                                                                                                                                                                                                                                                                                                                                                                                                                                                                                                                                                                                                                                                                                                                                                                                                                                                                                                                                                                                                                                                                                                                                                                                                                                                                                                                                                                                                                                                                                                                                                                                                                                                                        | <p>C,0,-1.982608183,-2.4895577278,1.4760280019<br/> C,0,-2.039028198,-3.6649128214,2.2031019376<br/> C,0,-0.5694998892,-4.7249400139,0.6391490158<br/> H,0,0.0644528255,-3.5109131947,-1.005726629<br/> H,0,-2.5231092195,-1.6203826104,1.8217684986<br/> H,0,-2.6455389485,-3.7048536776,3.1007342771<br/> H,0,-0.0215675457,-5.5956893164,0.2975392408<br/> H,0,-1.3810879687,-5.7069271247,2.3704214234</p>                                                                                                                                                                                                                                                                                                                                                                                                                                                                                                                                                                                                                                                                                                                                                                                                                                                                                                                                                                                                                                                                                                                                                                                                                                                                                                                                                                                                                                                                                                                                                                                                                                                                                                                                                                                                                                                                                                                                                                                                                                                                                                                                                                                                             |
| 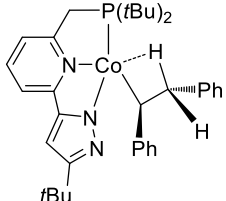 <p><b>PNNCo-trans-Ph-C-CHPh-H-agostic</b></p>                                                                                                                                                                                                                                                                                                                                                                                                                                                                                                                                                                                                                                                                                                                                                                                                                                                                                                                                                                                                                                                                                                                                                                                                                                                                                                                                                                                                                                                                                                                                                                                                                                                                                                                                                                                                                                                                                                                                                                                                                                                                                                                                                                                                                                                                                                                                                                                                                                                                      |  <p><b>TS4</b></p>                                                                                                                                                                                                                                                                                                                                                                                                                                                                                                                                                                                                                                                                                                                                                                                                                                                                                                                                                                                                                                                                                                                                                                                                                                                                                                                                                                                                                                                                                                                                                                                                                                                                                                                                                                                                                                                                                                                                                                                                                                                                                                                                                                                                                                                                                                                                                                                                                                                                                                                       |
| <p>Co,0,0.0847281783,0.1247403664,-0.7610738415<br/> P,0,1.6863938294,0.6364222886,-2.2519297042<br/> N,0,1.4606801237,-1.1325371068,-0.1521828718<br/> C,0,3.2359650869,-2.9641173054,0.8381795568<br/> C,0,1.5740919455,-1.2753395588,1.1963214116<br/> C,0,2.3426017581,-1.7082129433,-0.9846914471<br/> C,0,3.2308521586,-2.6637410914,-0.5242502778<br/> C,0,2.4436186114,-2.2447360061,1.7080956372<br/> H,0,3.9196734872,-3.1415330899,-1.2076857906<br/> H,0,2.516580635,-2.3817665867,2.7785498898<br/> H,0,3.9131159867,-3.7178200836,1.2206728974<br/> C,0,2.3538066513,-1.1225567473,-2.3643906853<br/> H,0,1.6634864036,-1.6555483433,-3.0265795218<br/> H,0,3.3474215739,-1.1974178375,-2.8136643965<br/> C,0,3.1254934924,1.7314397118,-1.6688530572<br/> C,0,1.2462865974,0.9961902434,-4.0657512577<br/> C,0,1.003524996,2.4906376518,-4.2548039959<br/> H,0,0.5748548278,2.6694361434,-5.2438960414<br/> H,0,1.9228524504,3.0719839277,-4.1913740978<br/> H,0,0.3011844117,2.8833258401,-3.5161655308<br/> C,0,-0.0665029445,0.2591527707,-4.3379381387<br/> H,0,-0.3684501344,0.4226078983,-5.3754783806<br/> H,0,-0.8726164211,0.6188493746,-3.6962233564<br/> H,0,0.0228056248,-0.8190283125,-4.1910389346<br/> C,0,2.2901993865,0.499113499,-5.063540766<br/> H,0,1.9537973917,0.7234695063,-6.0792449706<br/> H,0,2.4274379763,-0.5810456311,-5.0058119591<br/> H,0,3.2620262103,0.9693576705,-4.9335861365<br/> C,0,2.5252870759,3.0783957334,-1.2572714635<br/> H,0,2.1161179032,3.6366997013,-2.0978765247<br/> H,0,3.3050774977,3.695682806,-0.8046028263<br/> H,0,1.7350544968,2.9426170107,-0.5156814571<br/> C,0,3.7057151763,1.0871519195,-0.4082326446<br/> H,0,2.9442227344,0.9647531368,0.3630146244<br/> H,0,4.4801669894,1.7454775046,-0.0072387619<br/> H,0,4.1703266853,0.1191288478,-0.6024339064<br/> C,0,4.2366651199,1.9247236787,-2.6918789756<br/> H,0,3.9088019541,2.4884637309,-3.5651205103<br/> H,0,4.6548497634,0.9759564264,-3.0340693404<br/> H,0,5.0541862891,2.489461849,-2.2358285203<br/> C,0,0.8578434926,-0.2768973133,1.9268360264<br/> N,0,0.3893246335,0.784324911,1.1931440501<br/> C,0,0.5473424988,-0.064419891,3.2695922206<br/> H,0,0.7753380244,-0.6997121531,4.1112145101<br/> C,0,-0.1346961735,1.1500223428,3.2674119724<br/> N,0,-0.2160467974,1.6459971045,2.0079494163<br/> C,0,-0.7360190836,1.8825064073,4.4408318679<br/> C,0,0.3666223601,2.2553869125,5.4368428546<br/> H,0,0.8874469934,1.3693322867,5.8042147964<br/> H,0,-0.0508128413,2.7794678372,6.3001619303<br/> H,0,1.1085664897,2.9071714157,4.9732599778</p> | <p>N,0,-0.9257456859,-0.9836003428,1.1815579935<br/> C,0,0.0913848645,-1.5611310981,1.8777442732<br/> C,0,-0.2146078427,-2.401600667,2.9547241092<br/> C,0,-1.5346757029,-2.7010255153,3.2201675161<br/> C,0,-2.5442563456,-2.234317833,3.3778241133<br/> C,0,-2.1943131799,-1.3888809425,1.3398823209<br/> Co,0,-0.3991886647,0.3461974985,-0.1739984241<br/> P,0,-2.0490858295,-0.662522301,-1.2978220601<br/> C,0,-3.1087528445,-0.9591987158,0.2331017995<br/> N,0,1.3530720324,-0.7172315326,0.0584659969<br/> N,0,2.5779080315,-0.719844967,-0.4563535057<br/> C,0,3.3956209166,-1.3352390658,0.4353117188<br/> C,0,2.6779289573,-1.7433104697,1.5561991948<br/> C,0,1.3712998883,-1.332293383,1.2856582348<br/> C,0,0.0939636501,1.7958396662,1.172571058<br/> C,0,-1.3515906792,1.4846725676,3.1531246258<br/> C,0,-2.5342018136,1.6603909527,3.8467358676<br/> C,0,-3.5554385649,2.4367050229,3.3115267174<br/> C,0,-3.3639992245,3.046095994,2.0789894928<br/> C,0,-2.1787657261,2.8713112551,1.3830435817<br/> C,0,-1.1444470433,2.075855645,1.8961860679<br/> C,0,0.4019889164,2.3065307529,-0.1191899515<br/> C,0,1.9721153157,3.2315591932,-1.7970818664<br/> C,0,3.2361203441,3.5669400576,-2.250078755<br/> C,0,2.9138555028,2.2997751837,0.1974581305<br/> C,0,4.3476160007,3.2769258615,-1.4720951725<br/> C,0,4.1792716415,2.6450594393,-0.2489824476<br/> C,0,1.7890925692,2.5998574672,-0.5666042168<br/> H,0,-3.5725176202,-2.5431534891,2.5072422618<br/> H,0,0.5872809119,-2.8393116355,3.5336813395<br/> H,0,-1.7838462193,-3.3525561888,4.0486977857<br/> H,0,-3.5736408147,0.0066138625,0.4613320202<br/> H,0,-3.918921843,-1.6782962888,0.0888915966<br/> C,0,-1.698501995,-2.3625813607,-2.071006823<br/> C,0,-3.2139730176,0.3583059052,-2.3962538279<br/> C,0,-2.6766059038,0.4111197897,-3.8232904811<br/> H,0,-3.2459270456,1.14587455,-4.3978808283<br/> H,0,-2.7691857156,-0.5436772762,-4.3397632612<br/> H,0,-1.6278802984,0.7134992388,-3.8487548061<br/> C,0,-3.2002187617,1.7773282092,-1.8265239493<br/> H,0,-3.8653920167,2.412506662,-2.4169964281<br/> H,0,-2.2002424828,2.2125594079,-1.8597183583<br/> H,0,-3.5461565719,1.8144559478,-0.7920166104<br/> C,0,-4.6556540341,-0.1470018196,-2.3902090941<br/> H,0,-5.2650159404,0.4992583682,-3.027352368<br/> H,0,-5.0949423045,-0.1141007704,-1.3928077703<br/> H,0,-4.7553868511,-1.1613440263,-2.7695776731<br/> C,0,-0.5853238107,-2.1678864045,-3.1036184691<br/> H,0,-0.9005056506,-1.5790799632,-3.9630093108<br/> H,0,-0.2698347457,-3.1454038213,-3.4762834246<br/> H,0,0.2845182472,-1.6833914556,-2.6562136413</p> |

|                                                                                                                                                                                                                                                                                                                                                                                                                                                                                                                                                                                                                                                                                                                                                                                                                                                                                                                                                                                                                                                                                                                                                                                                                                                                                                                                                                                                                                                                                                                                                                                                                                                                                                                                                                                                       |                                                                                                                                                                                                                                                                                                                                                                                                                                                                                                                                                                                                                                                                                                                                                                                                                                                                                                                                                                                                                                                                                                                                                                                                                                                                                                                                                                                                                                                                                                                                                                                                                                                                                                                                                                                              |
|-------------------------------------------------------------------------------------------------------------------------------------------------------------------------------------------------------------------------------------------------------------------------------------------------------------------------------------------------------------------------------------------------------------------------------------------------------------------------------------------------------------------------------------------------------------------------------------------------------------------------------------------------------------------------------------------------------------------------------------------------------------------------------------------------------------------------------------------------------------------------------------------------------------------------------------------------------------------------------------------------------------------------------------------------------------------------------------------------------------------------------------------------------------------------------------------------------------------------------------------------------------------------------------------------------------------------------------------------------------------------------------------------------------------------------------------------------------------------------------------------------------------------------------------------------------------------------------------------------------------------------------------------------------------------------------------------------------------------------------------------------------------------------------------------------|----------------------------------------------------------------------------------------------------------------------------------------------------------------------------------------------------------------------------------------------------------------------------------------------------------------------------------------------------------------------------------------------------------------------------------------------------------------------------------------------------------------------------------------------------------------------------------------------------------------------------------------------------------------------------------------------------------------------------------------------------------------------------------------------------------------------------------------------------------------------------------------------------------------------------------------------------------------------------------------------------------------------------------------------------------------------------------------------------------------------------------------------------------------------------------------------------------------------------------------------------------------------------------------------------------------------------------------------------------------------------------------------------------------------------------------------------------------------------------------------------------------------------------------------------------------------------------------------------------------------------------------------------------------------------------------------------------------------------------------------------------------------------------------------|
| <p>C,0,-1.4468399456,3.1477209438,3.9710731697<br/> H,0,-2.2460031963,2.9089378913,3.2694070852<br/> H,0,-0.7613416211,3.8216799059,3.4572995913<br/> H,0,-1.8794825784,3.6751426257,4.8243819056<br/> C,0,-1.7514898386,0.9701693472,5.1370543745<br/> H,0,-1.2829747237,0.0541212592,5.5010962352<br/> H,0,-2.5512710466,0.6848527226,4.4508984965<br/> H,0,-2.2047439506,1.476084258,5.9930445972<br/> H,0,-1.209177984,1.0459973511,-1.3303026196<br/> C,0,-1.5798699132,-0.7840464506,-0.126525051<br/> H,0,-1.7010775058,-0.758635696,0.9522372251<br/> C,0,-2.0818031156,0.4020305121,-0.8546000958<br/> H,0,-2.6142685512,0.1287442531,-1.7731644632<br/> C,0,-2.8730224336,1.4084677612,-0.0654457581<br/> C,0,-1.4910344228,-2.1034656589,-0.7262831411<br/> C,0,-1.0099249103,-4.64618175,-1.842451086<br/> C,0,-1.5537014135,-2.3162712533,-2.1134027166<br/> C,0,-1.1999863273,-3.2146813364,0.0844348335<br/> C,0,-0.9624159531,-4.4597940101,-0.4645224952<br/> C,0,-1.3147219492,-3.5667155935,-2.6602525919<br/> H,0,-1.7988952799,-1.4894343495,-2.7703608797<br/> H,0,-1.1457558398,-3.0727373204,1.1585125819<br/> H,0,-0.7347925218,-5.2962616257,0.1855586331<br/> H,0,-1.3727200229,-3.7000005531,-3.7346387544<br/> H,0,-0.8235465277,-5.6227658234,-2.2704887695<br/> C,0,-2.489885851,2.74308696,-0.0017937717<br/> C,0,-3.2623314185,3.6668853341,0.6836725645<br/> C,0,-4.4242925287,3.2635868759,1.3249656857<br/> C,0,-4.0319547382,1.0072623445,0.5941658358<br/> C,0,-4.8032082963,1.9289828966,1.285243635<br/> H,0,-1.5581171174,3.0500303733,-0.4662967536<br/> H,0,-2.9438262156,4.7006214264,0.7361289324<br/> H,0,-5.0237258319,3.983309796,1.8684686077<br/> H,0,-4.3276563414,-0.0357073981,0.5628711948<br/> H,0,-5.7018651588,1.6038565266,1.7950034135</p> | <p>C,0,-1.1424878704,-3.2668013355,-0.9691248518<br/> H,0,-0.2460700804,-2.8410291032,-0.5172556495<br/> H,0,-0.8640555336,-4.2240712759,-1.4163322747<br/> H,0,-1.8693415849,-3.4750460134,-0.1824655283<br/> C,0,-2.9118279,-3.0327254607,-2.7023837433<br/> H,0,-3.2808816273,-2.4953723523,-3.5755753545<br/> H,0,-3.7371162613,-3.1474221013,-1.9967212694<br/> H,0,-2.6354605052,-4.035692442,-3.0382995101<br/> H,0,3.0411803687,-2.2698276406,2.4248666946<br/> C,0,4.8681163593,-1.5124338187,0.1584282537<br/> C,0,5.2159888237,-3.0046585406,0.1617072395<br/> H,0,4.9823431415,-3.4668484958,1.1224630179<br/> H,0,6.2811910699,-3.1548985555,-0.0303838398<br/> H,0,4.6563804287,-3.5383092717,-0.6077744026<br/> C,0,5.2333312823,-0.9128953965,-1.1961868048<br/> H,0,4.988338448,0.1484503367,-1.2383230641<br/> H,0,4.6848152528,-1.3978423919,-2.0031996093<br/> H,0,6.3028908933,-1.0326189918,-1.3834635962<br/> C,0,5.6765036766,-0.8136722295,1.2566647899<br/> H,0,5.4574451499,-1.2318831702,2.2406757803<br/> H,0,5.445371138,0.2522514867,1.2926182201<br/> H,0,6.7493147262,-0.9208295876,1.07900281<br/> H,0,-0.0019295103,1.3108888539,-1.2761824095<br/> H,0,0.9067644498,1.4119316293,1.7798534554<br/> H,0,-0.3025926929,3.0389413797,-0.5123590706<br/> H,0,-2.050866751,3.371899885,0.4309240861<br/> H,0,-0.5657971401,0.8647627815,3.5719009922<br/> H,0,-2.6637519432,1.1843862463,4.8114605477<br/> H,0,-4.1425449813,3.6712291774,1.6571523184<br/> H,0,-4.4817169289,2.575626901,3.8542352245<br/> H,0,1.1021436733,3.4593557767,-2.4056105919<br/> H,0,3.3543187389,4.0576500175,-3.2082971118<br/> H,0,5.3395512186,3.5409433374,-1.8170070339<br/> H,0,2.8073754821,1.7925540896,1.1484380177<br/> H,0,5.0433366896,2.4131670013,0.3616296767</p> |
| 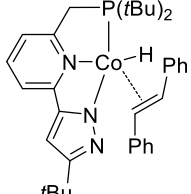 <p><b>PNNCo-H</b> + <b>trans-Ph-CH=CH-Ph-tetragonal</b><br/> <b>pyramidal</b></p>                                                                                                                                                                                                                                                                                                                                                                                                                                                                                                                                                                                                                                                                                                                                                                                                                                                                                                                                                                                                                                                                                                                                                                                                                                                                                                                                                                                                                                                                                                                                                                                                                                 |  <p><b>PNNCo-H</b> + <b>trans-Ph-CH=CH-Ph-trigonal</b><br/> <b>bipyramidal</b></p>                                                                                                                                                                                                                                                                                                                                                                                                                                                                                                                                                                                                                                                                                                                                                                                                                                                                                                                                                                                                                                                                                                                                                                                                                                                                                                                                                                                                                                                                                                                                                                                                                       |
| <p>Co,0,-0.1038550533,-0.0059024839,-0.5708962671<br/> P,0,1.4867887619,0.4864389677,-2.0078972393<br/> N,0,1.3391879305,-1.2143833123,0.1084745976<br/> C,0,3.1765340541,-2.9390359216,1.1793500653<br/> C,0,1.414785179,-1.3386193273,1.4626922785<br/> C,0,2.2662561557,-1.766211541,-0.6890197277<br/> C,0,3.1963391738,-2.6601005721,-0.1874086311<br/> C,0,2.3141863727,-2.258887849,2.0143478198<br/> H,0,3.9318471249,-3.1066238139,-0.8425058176<br/> H,0,2.3519086782,-2.3902269096,3.0872536594<br/> H,0,3.8817354065,-3.6485703822,1.5944259905<br/> C,0,2.2659034063,-1.2224649127,-2.0852329675<br/> H,0,1.6135989648,-1.8163084233,-2.7363547968<br/> H,0,3.2670409693,-1.2485408246,-2.5226171103<br/> C,0,2.813948227,1.6991451758,-1.3965345337<br/> C,0,1.0188178369,0.8305469986,-3.8109611082<br/> C,0,0.6735751785,2.3056697762,-3.9910513175<br/> H,0,0.2338819305,2.4539441191,-4.980258358<br/> H,0,1.5487556489,2.9514989277,-3.9272157696<br/> H,0,-0.0558537982,2.6394694203,-3.2510567723<br/> C,0,-0.2395430762,0.0071023353,-4.0842766775<br/> H,0,-0.5727700038,0.1828898399,-5.1102333107<br/> H,0,-1.0502349002,0.2858291068,-3.4088133064</p>                                                                                                                                                                                                                                                                                                                                                                                                                                                                                                                                                                                                                      | <p>Co,0,0.1369381494,-0.3311797038,0.0147031674<br/> P,0,0.3237834482,-1.1415636251,-2.1291599524<br/> N,0,-0.9791322704,-1.9874144671,0.3065744042<br/> C,0,-2.8354323915,-3.9421458119,0.8094708531<br/> C,0,-1.5567720798,-2.0560127881,1.5378095987<br/> C,0,-1.2105213574,-2.9289373031,-0.6151745018<br/> C,0,-2.1550164273,-3.9209744815,-0.4057696099<br/> C,0,-2.5230626196,-3.0297050368,1.7969856937<br/> H,0,-2.3380534509,-4.6686025672,-1.1658471603<br/> H,0,-3.0035324516,-3.0619184185,2.7652549887<br/> H,0,-3.588446092,-4.6987996133,0.9922385341<br/> C,0,-0.2893726375,-2.8755802754,-1.78809596<br/> H,0,-0.7087043938,-3.3559660021,-2.6733993214<br/> H,0,0.6029544001,-3.4492941075,-1.5176640616<br/> C,0,2.0169104353,-1.5106596445,-2.9411386626<br/> C,0,-0.9269630954,-0.6092242882,-3.4841779883<br/> C,0,-0.7505651302,0.8598555993,-3.864876843<br/> H,0,-1.4620407192,1.1081248071,-4.6569024658<br/> H,0,0.246649344,1.0916250742,-4.2336870166<br/> H,0,-0.9559182711,1.5278138839,-3.0332201057<br/> C,0,-2.3025273318,-0.7872946223,-2.8364247305<br/> H,0,-3.0650877298,-0.304550706,-3.452451178<br/> H,0,-2.3423389588,-0.3401400107,-1.8409305048</p>                                                                                                                                                                                                                                                                                                                                                                                                                                                                                                                                                                                             |

|                                                                                                                                                                                                                                                                                                                                                                                                                                                                                                                                                                                                                                                                                                                                                                                                                                                                                                                                                                                                                                                                                                                                                                                                                                                                                                                                                                                                                                                                                                                                                                                                                                                                                                                                                                                                                                                                                                                                                                                                                                                                                                                                                                                                                                                                                                                                                                                                                                                                                                                                                                                                                                                                                                                                                                                                                                                                                                                                                                                                                                                                                                                                                                                                               |                                                                                                                                                                                                                                                                                                                                                                                                                                                                                                                                                                                                                                                                                                                                                                                                                                                                                                                                                                                                                                                                                                                                                                                                                                                                                                                                                                                                                                                                                                                                                                                                                                                                                                                                                                                                                                                                                                                                                                                                                                                                                                                                                                                                                                                                                                                                                                                                                                                                                                                                                                                                                                                                                                                                                                                                                                                                                                                                                                                                                                                                                                                                                                                                                  |
|---------------------------------------------------------------------------------------------------------------------------------------------------------------------------------------------------------------------------------------------------------------------------------------------------------------------------------------------------------------------------------------------------------------------------------------------------------------------------------------------------------------------------------------------------------------------------------------------------------------------------------------------------------------------------------------------------------------------------------------------------------------------------------------------------------------------------------------------------------------------------------------------------------------------------------------------------------------------------------------------------------------------------------------------------------------------------------------------------------------------------------------------------------------------------------------------------------------------------------------------------------------------------------------------------------------------------------------------------------------------------------------------------------------------------------------------------------------------------------------------------------------------------------------------------------------------------------------------------------------------------------------------------------------------------------------------------------------------------------------------------------------------------------------------------------------------------------------------------------------------------------------------------------------------------------------------------------------------------------------------------------------------------------------------------------------------------------------------------------------------------------------------------------------------------------------------------------------------------------------------------------------------------------------------------------------------------------------------------------------------------------------------------------------------------------------------------------------------------------------------------------------------------------------------------------------------------------------------------------------------------------------------------------------------------------------------------------------------------------------------------------------------------------------------------------------------------------------------------------------------------------------------------------------------------------------------------------------------------------------------------------------------------------------------------------------------------------------------------------------------------------------------------------------------------------------------------------------|------------------------------------------------------------------------------------------------------------------------------------------------------------------------------------------------------------------------------------------------------------------------------------------------------------------------------------------------------------------------------------------------------------------------------------------------------------------------------------------------------------------------------------------------------------------------------------------------------------------------------------------------------------------------------------------------------------------------------------------------------------------------------------------------------------------------------------------------------------------------------------------------------------------------------------------------------------------------------------------------------------------------------------------------------------------------------------------------------------------------------------------------------------------------------------------------------------------------------------------------------------------------------------------------------------------------------------------------------------------------------------------------------------------------------------------------------------------------------------------------------------------------------------------------------------------------------------------------------------------------------------------------------------------------------------------------------------------------------------------------------------------------------------------------------------------------------------------------------------------------------------------------------------------------------------------------------------------------------------------------------------------------------------------------------------------------------------------------------------------------------------------------------------------------------------------------------------------------------------------------------------------------------------------------------------------------------------------------------------------------------------------------------------------------------------------------------------------------------------------------------------------------------------------------------------------------------------------------------------------------------------------------------------------------------------------------------------------------------------------------------------------------------------------------------------------------------------------------------------------------------------------------------------------------------------------------------------------------------------------------------------------------------------------------------------------------------------------------------------------------------------------------------------------------------------------------------------------|
| <p>H,0,-0.0655378156,-1.0644617621,-3.977155415<br/> C,0,2.1004652281,0.4083547202,-4.8036543504<br/> H,0,1.7518428014,0.6095492261,-5.8198232796<br/> H,0,2.3118472237,-0.6599975,-4.7464735519<br/> H,0,3.0367436962,0.9457712044,-4.6708238847<br/> C,0,2.0988347466,2.9900128491,-0.9899846293<br/> H,0,1.6656923954,3.5203850617,-1.8357815292<br/> H,0,2.820056577,3.6612339006,-0.5175731443<br/> H,0,1.303484721,2.7876669774,-0.2704024768<br/> C,0,3.4426648433,1.109311338,-0.1327488989<br/> H,0,2.6955519536,0.9382513947,0.6424673949<br/> H,0,4.16560569,1.8285394031,0.2593578205<br/> H,0,3.9797870723,0.1778338642,-0.3183813246<br/> C,0,3.9122624042,1.9819011236,-2.4140497197<br/> H,0,3.5446716625,2.5129886284,-3.2914291125<br/> H,0,4.4124337858,1.071057249,-2.7495753047<br/> H,0,4.674435286,2.6155070063,-1.9531223934<br/> C,0,0.6388875633,-0.3574999297,2.1511880591<br/> H,0,0.0699982575,0.6069920138,1.3543419788<br/> C,0,0.4803906129,0.0241827366,3.4846541302<br/> H,0,0.8281677726,-0.4902185099,4.3666076733<br/> C,0,-0.1933141182,1.2399769626,3.407409888<br/> N,0,-0.4331298847,1.5729098845,2.1137253726<br/> C,0,-0.5630185273,2.1702624963,4.5366849191<br/> C,0,0.7157477939,2.813150452,5.0886813394<br/> H,0,1.407786762,2.0581969582,5.4663277022<br/> H,0,0.4838171131,3.4974972767,5.9086353631<br/> H,0,1.2324244715,3.379451219,4.3124017662<br/> C,0,-1.5011766784,3.2681530242,4.0444261731<br/> H,0,-2.4198572653,2.8478782918,3.6351431776<br/> H,0,-1.0387014299,3.8561997382,3.2528734879<br/> H,0,-1.7613950734,3.9365316858,4.8684225815<br/> C,0,-1.2435995813,1.3827227686,5.6580303999<br/> H,0,-0.5923616757,0.6011833603,6.0534064772<br/> H,0,-2.1571416561,0.9046139221,5.3019112417<br/> H,0,-1.509122358,2.0424668688,6.4871923828<br/> H,0,-0.8504504927,1.1798524761,-1.1139805654<br/> C,0,-1.4839930126,-1.681114542,-0.2332433368<br/> H,0,-1.277413673,-1.928661172,0.8045617578<br/> C,0,-2.2791834085,-0.5832525115,-0.4948253407<br/> H,0,-2.5992574471,-0.4165377988,-1.519132697<br/> C,0,-3.0224390774,0.1866222898,0.4998811241<br/> C,0,-4.5694181975,1.6506691642,2.3186043291<br/> C,0,-3.0815267254,-0.1799556845,1.8470830852<br/> C,0,-3.7452804964,1.3107660569,0.090407172<br/> C,0,-4.5067826454,2.0375871965,0.9872731599<br/> C,0,-3.8504774799,0.5411982071,2.7421545922<br/> H,0,-2.5215317858,-1.0373417515,2.2009645375<br/> H,0,-3.6923240896,1.6154717373,-0.9492900741<br/> H,0,-5.0561083045,2.9070283337,0.6477415307<br/> H,0,-3.8911862353,0.234188911,3.7801649954<br/> H,0,-5.1687720097,2.213439471,3.023558718<br/> C,0,-1.1068029178,-2.7155169293,-1.1954640262<br/> C,0,-0.3081942059,-4.7375220477,-2.9826737821<br/> C,0,-1.5772211557,-2.7445750989,-2.5151201412<br/> C,0,-0.2471777762,-3.7480170836,-0.7922497219<br/> C,0,0.1490502259,-4.740164811,-1.6712731766<br/> C,0,-1.1797733638,-3.7371181779,-3.3946053526<br/> H,0,-2.2721514304,-1.9853795239,-2.8529943956<br/> H,0,0.1141007264,-3.7576737527,0.2307738177<br/> H,0,0.818047074,-5.5211133783,-1.3300615464<br/> H,0,-1.562053748,-3.7362910554,-4.4085356839<br/> H,0,-0.0024496756,-5.5146167843,-3.6716534725</p> | <p>H,0,-2.5815342784,-1.8373510872,-2.7385027352<br/> C,0,-0.8783641292,-1.4373461536,-4.7644639674<br/> H,0,-1.737093385,-1.171441523,-5.3871447616<br/> H,0,-0.9367676409,-2.5115131941,-4.5859335581<br/> H,0,0.0153066436,-1.2348776374,-5.353946845<br/> C,0,2.4605253231,-0.3061474626,-3.7653515356<br/> H,0,1.8855455719,-0.1992737561,-4.6858191555<br/> H,0,3.5077804281,-0.4295122841,-4.0523575949<br/> H,0,2.3881337991,0.6239882179,-3.2009126931<br/> C,0,3.0347928597,-1.7349391804,-1.8244197551<br/> H,0,3.2047216059,-0.8285349564,-1.2470328866<br/> H,0,3.9833275307,-2.0426822095,-2.2728818203<br/> H,0,2.7269302381,-2.5161126175,-1.1268417992<br/> C,0,2.01312448,-2.7623966822,-3.8213075306<br/> H,0,1.3074830222,-2.7163721898,-4.6457153315<br/> H,0,1.8134500327,-3.6711668687,-3.2536568744<br/> H,0,3.0087087296,-2.8787780915,-4.2567255744<br/> C,0,-0.9946871604,-1.1184259695,2.4573975445<br/> N,0,0.0025400321,-0.3320417458,1.9499423794<br/> C,0,-1.0794288849,-0.8744814708,3.8282947513<br/> H,0,-1.7519382005,-1.3263353118,4.5386843103<br/> C,0,-0.0897873115,0.0757998612,4.0634622617<br/> N,0,0.5530200287,0.389571961,2.9121291082<br/> C,0,0.3474481303,0.7094195992,5.3600234281<br/> C,0,0.5011122226,2.2200432429,5.1712487199<br/> H,0,1.2088018551,2.4399136611,4.3721267826<br/> H,0,0.8617152503,2.6885862792,6.0896021686<br/> H,0,-0.4518433663,2.6845233579,4.9116828382<br/> C,0,-0.6810986562,0.4346213268,6.4529282735<br/> H,0,-0.7851785233,-0.63477699,6.6455310455<br/> H,0,-1.6646878429,0.8228130918,6.1800995574<br/> H,0,-0.3808757742,0.9092794258,7.3887529601<br/> C,0,1.7003929775,0.1197091526,5.7737962948<br/> H,0,2.4503199022,0.3012479443,5.0038456441<br/> H,0,1.6291686467,-0.9588763211,5.9234133915<br/> H,0,2.050493921,0.5681867647,6.7067042901<br/> H,0,1.5886662769,-0.6711292674,0.1129871471<br/> C,0,-0.6413025791,1.6894278661,-0.2325734382<br/> H,0,-0.9120479708,1.7798825774,-1.2781288675<br/> C,0,0.7177765018,1.7196957189,0.0814996338<br/> C,0,-1.7691460634,1.8440772825,0.6799123736<br/> C,0,-3.9993518166,2.0849345981,2.3741804307<br/> C,0,-3.0672308002,1.567990301,0.2225796238<br/> C,0,-1.6277784215,2.2907770779,2.001218755<br/> C,0,-2.7263741196,2.396298926,2.8345340421<br/> C,0,-4.1651674887,1.6812521054,1.0556600694<br/> H,0,-3.2062501609,1.2611643488,-0.8086703188<br/> H,0,-0.6434670219,2.5406690445,2.3744813267<br/> H,0,-2.5898140938,2.7323798257,3.855930803<br/> H,0,-5.1546413355,1.456878823,0.6758470946<br/> H,0,-4.8552509958,2.1707289816,3.0318086175<br/> H,0,1.0046719523,1.7560810273,1.1302246657<br/> C,0,1.7632831851,2.1282861414,-0.8621264105<br/> C,0,3.8239269083,2.9635146492,-2.5815299813<br/> C,0,3.1004894581,1.7972066957,-0.6055013707<br/> C,0,1.4904803832,2.9050420501,-1.9931800243<br/> C,0,2.5074374053,3.3127939252,-2.8446906305<br/> C,0,4.1151565475,2.2065996006,-1.4516044777<br/> H,0,3.3234856523,1.2032037303,0.2745143455<br/> H,0,0.4730342085,3.2243906438,-2.184926775<br/> H,0,2.2706213394,3.9210777101,-3.7096930871<br/> H,0,5.1409655162,1.936846617,-1.2304650329<br/> H,0,4.6181141861,3.2873277814,-3.2424989354</p> |
| 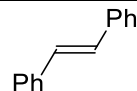                                                                                                                                                                                                                                                                                                                                                                                                                                                                                                                                                                                                                                                                                                                                                                                                                                                                                                                                                                                                                                                                                                                                                                                                                                                                                                                                                                                                                                                                                                                                                                                                                                                                                                                                                                                                                                                                                                                                                                                                                                                                                                                                                                                                                                                                                                                                                                                                                                                                                                                                                                                                                                                                                                                                                                                                                                                                                                                                                                                                                                                                                                                           |                                                                                                                                                                                                                                                                                                                                                                                                                                                                                                                                                                                                                                                                                                                                                                                                                                                                                                                                                                                                                                                                                                                                                                                                                                                                                                                                                                                                                                                                                                                                                                                                                                                                                                                                                                                                                                                                                                                                                                                                                                                                                                                                                                                                                                                                                                                                                                                                                                                                                                                                                                                                                                                                                                                                                                                                                                                                                                                                                                                                                                                                                                                               |
| C,0,-0.0000000763,-0.1722159607,1.0624772172                                                                                                                                                                                                                                                                                                                                                                                                                                                                                                                                                                                                                                                                                                                                                                                                                                                                                                                                                                                                                                                                                                                                                                                                                                                                                                                                                                                                                                                                                                                                                                                                                                                                                                                                                                                                                                                                                                                                                                                                                                                                                                                                                                                                                                                                                                                                                                                                                                                                                                                                                                                                                                                                                                                                                                                                                                                                                                                                                                                                                                                                                                                                                                  | H,0,-0.3010734404,-0.2697041349,0.2468377231                                                                                                                                                                                                                                                                                                                                                                                                                                                                                                                                                                                                                                                                                                                                                                                                                                                                                                                                                                                                                                                                                                                                                                                                                                                                                                                                                                                                                                                                                                                                                                                                                                                                                                                                                                                                                                                                                                                                                                                                                                                                                                                                                                                                                                                                                                                                                                                                                                                                                                                                                                                                                                                                                                                                                                                                                                                                                                                                                                                                                                                                                                                                                                     |

|                                                                                                                                                                                                                                                                                                                                                                                                                                                                                                                                                                                                                                                                                                                                                                                                                                                                                                                                                                                                                                                                                                                                                                                                                                                                                                                                                                                                                                                                                                                                                                                                                                                |                                                                                                                                                                                                                                                                                                                                                                                                                                                                                                                                                                                                                                                                                                                                                                                                                                                                                                                                                                                                                                                                                                                                                                                                                                                                                                                                                                                                                                                                                                                                                                                                                                                                 |
|------------------------------------------------------------------------------------------------------------------------------------------------------------------------------------------------------------------------------------------------------------------------------------------------------------------------------------------------------------------------------------------------------------------------------------------------------------------------------------------------------------------------------------------------------------------------------------------------------------------------------------------------------------------------------------------------------------------------------------------------------------------------------------------------------------------------------------------------------------------------------------------------------------------------------------------------------------------------------------------------------------------------------------------------------------------------------------------------------------------------------------------------------------------------------------------------------------------------------------------------------------------------------------------------------------------------------------------------------------------------------------------------------------------------------------------------------------------------------------------------------------------------------------------------------------------------------------------------------------------------------------------------|-----------------------------------------------------------------------------------------------------------------------------------------------------------------------------------------------------------------------------------------------------------------------------------------------------------------------------------------------------------------------------------------------------------------------------------------------------------------------------------------------------------------------------------------------------------------------------------------------------------------------------------------------------------------------------------------------------------------------------------------------------------------------------------------------------------------------------------------------------------------------------------------------------------------------------------------------------------------------------------------------------------------------------------------------------------------------------------------------------------------------------------------------------------------------------------------------------------------------------------------------------------------------------------------------------------------------------------------------------------------------------------------------------------------------------------------------------------------------------------------------------------------------------------------------------------------------------------------------------------------------------------------------------------------|
| <p>H,0,-0.0000001991,0.6174809514,1.8096982291<br/> C,0,-0.0000000055,0.1711500583,-0.2350626164<br/> H,0,0.0000001173,-0.6185468538,-0.9822836282<br/> C,0,-0.0000000067,-1.5164955553,1.610577495<br/> C,0,0.0000001165,-4.0728711136,2.7739632985<br/> C,0,0.000000015,-2.6721833981,0.817019049<br/> C,0,-0.0000000994,-1.6826953163,3.0013144794<br/> C,0,-0.0000000389,-2.9417561788,3.5765556974<br/> C,0,0.0000002104,-3.9288271458,1.3911618977<br/> H,0,0.0000002253,-2.5832381722,-0.2624469837<br/> H,0,-0.0000002209,-0.8003557462,3.6319032887<br/> H,0,-0.0000001132,-3.0406564153,4.6550441144<br/> H,0,0.0000003319,-4.806859908,0.7568739002<br/> H,0,0.0000001643,-5.0595137716,3.2195413181<br/> C,0,-0.0000000751,1.5154296529,-0.7831628942<br/> C,0,-0.0000001982,4.0718052112,-1.9465486977<br/> C,0,-0.0000002318,2.6711174957,0.0103955518<br/> C,0,0.0000000176,1.6816294139,-2.1738998786<br/> C,0,-0.0000004229,2.9406902764,-2.7491410966<br/> C,0,-0.0000002922,3.9277612434,-0.5637472968<br/> H,0,-0.0000003071,2.5821722698,1.0898615846<br/> H,0,0.0000001391,0.7992898438,-2.8044886879<br/> H,0,0.0000000315,3.0395905129,-3.8276295136<br/> H,0,-0.0000004136,4.8057940056,0.0705407007<br/> H,0,-0.000000246,5.0584478692,-2.3921267173</p>                                                                                                                                                                                                                                                                                                                                                             | <p>C,0,-0.0400151017,-0.0790744993,1.2913887774<br/> H,0,-0.341921802,-0.9685527028,1.851084131<br/> C,0,1.4836568382,0.0794239592,1.3992312648<br/> H,0,1.7855635385,0.9689021627,0.8395359111<br/> H,0,1.744715177,0.2700535948,2.443782319<br/> C,0,2.219551813,-1.1257188464,0.8929797215<br/> C,0,3.5094474848,-3.415270391,-0.0715601931<br/> C,0,2.5740087098,-1.2337037209,-0.4499717261<br/> C,0,2.5181843515,-2.1887670665,1.7424301932<br/> C,0,3.1586610042,-3.3232460626,1.2675440977<br/> C,0,3.214614222,-2.3659781433,-0.9299185449<br/> H,0,2.3487203732,-0.4139236729,-1.1243939804<br/> H,0,2.2490128447,-2.1197561912,2.791441031<br/> H,0,3.3876969447,-4.1365517998,1.9453410813<br/> H,0,3.4875529657,-2.4281788174,-1.9763257091<br/> H,0,4.0127564301,-4.2988047025,-0.4436335477<br/> C,0,-0.7759100764,1.1260683063,1.7976403207<br/> C,0,-2.0658057483,3.4156198509,2.7621802353<br/> C,0,-1.1303669732,1.2340531808,3.1405917682<br/> C,0,-1.0745426149,2.1891165264,0.948189849<br/> C,0,-1.7150192677,3.3235955224,1.4230759444<br/> C,0,-1.7709724854,2.3663276032,3.620538587<br/> H,0,-0.9050786366,0.4142731328,3.8150140225<br/> H,0,-0.8053711082,2.1201056511,-0.1008209889<br/> H,0,-1.9440552082,4.1369012597,0.7452789609<br/> H,0,-2.0439112292,2.4285282773,4.6669457513<br/> H,0,-2.5691146935,4.2991541624,3.1342535899</p>                                                                                                                                                                                                                                                                                        |
| 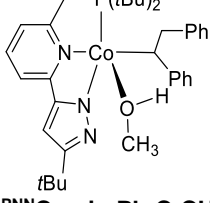 <p><b>PNNCo-cis-Ph-C-CH<sub>2</sub>-Ph+CH<sub>3</sub>OH</b></p>                                                                                                                                                                                                                                                                                                                                                                                                                                                                                                                                                                                                                                                                                                                                                                                                                                                                                                                                                                                                                                                                                                                                                                                                                                                                                                                                                                                                                                                                                             |  <p><b>TS5</b></p>                                                                                                                                                                                                                                                                                                                                                                                                                                                                                                                                                                                                                                                                                                                                                                                                                                                                                                                                                                                                                                                                                                                                                                                                                                                                                                                                                                                                                                                                                                                                                           |
| <p>Co,0,0.6375732055,-0.0921436385,0.2265274364<br/> P,0,1.4066650868,0.4007053983,-1.8203717451<br/> N,0,2.5954052256,-0.5131259752,0.5795310128<br/> C,0,5.1758364002,-1.3082795684,1.1661127867<br/> C,0,2.8469105528,-1.2233282817,1.7135749707<br/> C,0,3.6021354081,-0.1979162918,-0.2502412652<br/> C,0,4.9083111254,-0.5840825126,0.0100625969<br/> C,0,4.1453164677,-1.6289358181,2.025526404<br/> H,0,5.6972316751,-0.3163197626,-0.6799852012<br/> H,0,4.3218762013,-2.1960920082,2.9292807698<br/> H,0,6.188359521,-1.6206914346,1.3893960245<br/> C,0,3.2203436171,0.6052441654,-1.4506237061<br/> H,0,3.8657516757,0.3873433554,-2.3049522371<br/> H,0,3.3553767883,1.6672249668,-1.2218732534<br/> C,0,1.0579544804,1.9813633536,-2.8195256505<br/> C,0,1.3427509394,-1.1315971345,-2.9458875278<br/> C,0,-0.1178819759,-1.5420814029,-3.1277146959<br/> H,0,-0.1659459618,-2.4766877524,-3.6921694969<br/> H,0,-0.7043015198,-0.801944945,-3.6701061551<br/> H,0,-0.6017337871,-1.7113719795,-2.165306411<br/> C,0,2.0531438979,-2.2543496215,-2.1853937915<br/> H,0,1.9464215903,-3.18786579,-2.7428655589<br/> H,0,1.6212490472,-2.4100108801,-1.1935275313<br/> H,0,3.1213456679,-2.0683410696,-2.0630095466<br/> C,0,2.008337981,-0.9518869008,-4.3040313876<br/> H,0,2.0284311921,-1.9115620178,-4.8273696107<br/> H,0,3.0419069685,-0.610438581,-4.222206211<br/> H,0,1.4674250502,-0.2525036433,-4.9411486371<br/> C,0,-0.2405790771,1.8391616528,-3.6089118188<br/> H,0,-1.0652751829,1.485301473,-2.988258746<br/> H,0,-0.1367757809,1.1591519768,-4.4547387213<br/> H,0,-0.5283071568,2.8134132405,-4.0120687767</p> | <p>Co,0,-0.6671899074,0.1091978956,0.6537276096<br/> P,0,-2.5186751396,-0.9974956579,-0.3865665822<br/> N,0,-2.0162158144,1.4787840608,0.8691750198<br/> C,0,-3.721872952,3.5301786461,1.4514219894<br/> C,0,-1.5660328178,2.7569091687,0.7690767029<br/> C,0,-3.3084771204,1.2017927964,1.090351573<br/> C,0,-4.1922923454,2.2205597012,1.413776468<br/> C,0,-2.4161115748,3.8124322163,1.0986040913<br/> H,0,-5.2326361359,1.9925607081,1.6020285004<br/> H,0,-2.0548533931,4.830000408,1.0420434192<br/> H,0,-4.3962761256,4.3367284219,1.7108941456<br/> C,0,-3.7060221841,-0.2188266672,0.8416180552<br/> H,0,-4.7571008431,-0.2782677644,0.5502225302<br/> H,0,-3.5749630436,-0.8167632967,1.7489178787<br/> C,0,-2.9851477763,-2.8390416745,-0.2292041905<br/> C,0,-3.0284054141,-0.3439610611,-2.1018869644<br/> C,0,-1.906602995,-0.7156899697,-3.0755849834<br/> H,0,-2.1252016416,-0.2913242294,-4.0586937985<br/> H,0,-1.7863684465,-1.7896897975,-3.2045084477<br/> H,0,-0.9510662509,-0.3044186044,-2.7436919035<br/> C,0,-3.0747581768,1.1842338411,-2.0424524707<br/> H,0,-3.2686777371,1.5641847207,-3.0486162453<br/> H,0,-2.1244598204,1.6041188721,-1.7113674534<br/> H,0,-3.8691775179,1.5603098575,-1.3963395583<br/> C,0,-4.3728462092,-0.8509640018,-2.6085518177<br/> H,0,-4.610277413,-0.3625085265,-3.5576529867<br/> H,0,-5.1863031142,-0.6206867936,-1.9176874604<br/> H,0,-4.3776128324,-1.9243833435,-2.7929453336<br/> C,0,-2.450906875,-3.6256651373,-1.4236150637<br/> H,0,-1.3876136966,-3.4395993841,-1.5907000104<br/> H,0,-2.9833040191,-3.4088680756,-2.3489398811<br/> H,0,-2.5656643745,-4.6948656168,-1.228396095</p> |



C,0,0.8896794801,3.0882818533,-1.7784807295  
H,0,0.0469854854,2.8919576386,-1.1173054745  
H,0,0.7058083265,4.0391253853,-2.2852998209  
C,0,1.774733772,3.2122808527,-1.1528908088  
C,0,2.1898795167,2.3761944155,-3.7669755984  
H,0,2.3912269462,1.6302752451,-4.532482475  
H,0,3.120929828,2.5789229878,-3.2378547011  
H,0,1.9119083455,3.3002116716,-4.2809058172  
C,0,1.6784660957,-1.4698195479,2.4967281723  
N,0,0.4936710842,-1.0321165548,1.9807199919  
C,0,1.4488199849,-2.0128955078,3.760379172  
H,0,2.1702024795,-2.4426732589,4.436018464  
C,0,0.0781860974,-1.8602459238,3.9447321217  
N,0,-0.4781476268,-1.274771512,2.8632824041  
C,0,-0.7977642534,-2.2162641551,5.1187368247  
C,0,0.0339927826,-2.847884512,6.2301229671  
H,0,0.5221704714,-3.7636066572,5.8914439294  
H,0,-0.5979255558,-2.1050177957,7.0818816658  
H,0,0.8090436151,-2.1663659765,6.5860762081  
C,0,-1.4675703948,-0.9409811745,5.6425249811  
H,0,-2.0780099572,-0.4790860772,4.86525589  
H,0,-0.7234480058,-0.2086132407,5.96245518  
H,0,-2.1125782526,-1.162593503,6.4958696881  
C,0,-1.8813414739,-3.1990530114,4.6658867776  
H,0,-2.4787587077,-2.7697666174,3.8609126826  
H,0,-2.5487980728,-3.4482777982,5.4939977092  
H,0,-1.4418954947,-4.1266384778,4.2957417165  
C,0,-1.3641316724,0.1307611862,-0.1658965521  
H,0,-1.4781311988,0.3079391956,-1.2422061931  
C,0,-2.1022573059,-1.1737297684,0.166523178  
H,0,-2.0176232738,-1.3896768829,1.2315923484  
H,0,-1.6127778977,-2.0083081403,-0.3490812976  
C,0,-3.5485167142,-1.1073700164,-0.2376299873  
C,0,-6.2318440927,-4.18266384778,4.2957417165  
C,0,-3.9258563463,-1.2079249206,-1.5769762871  
C,0,-4.5439558101,-0.866910594,0.7077898836  
C,0,-5.8723867917,-0.7350119865,0.3296968977  
C,0,-5.2521079083,-1.0815392528,-1.9598010144  
H,0,-3.1630380924,-1.393528303,-2.3276861509  
H,0,-4.2650465763,-0.7825247844,1.7531801611  
H,0,-6.6302977979,-0.5486916657,1.0813228346  
H,0,-5.5243063074,-1.171588863,-3.0049678515  
H,0,-7.268750801,-0.7407623464,-1.3020209675  
C,0,-1.8961854375,1.320904448,0.5411322028  
C,0,-2.8079594061,3.6369080598,1.8821235331  
C,0,-2.0342774152,1.3517114492,1.9396256515  
C,0,-2.2612830071,2.4811450523,-0.157379927  
C,0,-2.7032645246,3.6215912633,0.4986327353  
C,0,-2.4775902039,2.4891288539,2.5943405765  
H,0,-1.7651256482,0.4651379901,2.5044945965  
H,0,-2.2155953816,2.4737850788,-1.2420477342  
H,0,-2.980427031,4.49750858,-0.0764132256  
H,0,-2.5671299793,2.4779933813,3.6753620884  
H,0,-3.1543456175,4.5244628299,2.3966326313  
O,0,1.0077824313,1.9790226562,1.2449704531  
C,0,1.3323362838,1.9188769211,2.6329101423  
H,0,2.2961299138,1.4203512458,2.7147234053  
H,0,0.5936401262,1.3428161598,3.1975656078  
H,0,1.4151384153,2.9229347823,3.0563534805  
H,0,0.1123242299,2.3431519608,1.1785345877

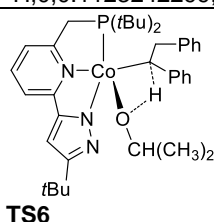

C,0,-2.2734979256,-3.351150212,1.023977414  
H,0,-1.1900232956,-3.298111381,0.9150676089  
H,0,-2.5436120916,-4.3977126644,1.1873953335  
H,0,-2.5287849674,-2.7864109676,1.9198021837  
C,0,-4.4836766822,-3.085507925,-0.0672046704  
H,0,-5.0737237263,-2.7223168377,-0.90592616  
H,0,-4.8739484645,-2.6312536942,0.8437012663  
H,0,-4.6617972106,-4.1612595483,0.0142917933  
C,0,-0.2618679772,2.8184153849,0.182195722  
N,0,0.2479155535,1.6146837413,-0.2333447362  
C,0,0.595964886,3.8294174557,-0.2432652355  
H,0,0.4898694938,4.8913569496,-0.0951944262  
C,0,1.6111230134,3.1511896094,-0.9140884581  
N,0,1.3836049826,1.8187177087,-0.8967989189  
C,0,2.844189424,3.6849285144,-1.5985565584  
C,0,2.8744846482,5.2080965799,-1.5223502081  
H,0,2.003243151,5.6497702834,-2.0095817357  
H,0,3.7646852705,5.5968440607,-2.0194432193  
H,0,2.8940562082,5.5566328971,-0.4880901544  
C,0,4.0876357428,3.1161160068,-0.9073186466  
H,0,4.0989230704,2.0268795767,-0.9658553656  
H,0,4.113275972,3.3948627547,0.1476737451  
H,0,4.9986947036,3.4907384045,-1.3792886725  
C,0,2.8426434033,3.2444563157,-3.0649910753  
H,0,2.8084546586,2.1574587689,-3.1404620167  
H,0,3.742131702,3.5969496675,-3.5747181636  
H,0,1.9762864925,3.6431039233,-3.5952948787  
C,0,0.9901564126,-1.4288943822,0.7798270752  
H,0,0.7593340931,-2.4732837634,1.0441648402  
C,0,1.2535054483,-1.4383717549,-0.7339834329  
H,0,1.463607604,-0.4327660539,-1.1006035936  
H,0,0.3388562031,-1.7693489844,-1.2368342056  
C,0,2.3865936176,-2.3567130055,-1.1049460235  
C,0,4.5075584002,-4.0673907505,-1.7439703881  
C,0,2.2520116723,-3.7392556678,-0.9839348669  
C,0,3.6025927552,-1.8477203907,-1.5525153983  
C,0,4.6553786122,-2.6942929195,-1.8696960694  
C,0,3.2993165377,-4.5892019031,-1.301103063  
H,0,1.3077873526,-4.1521722648,-0.6384134912  
C,0,3.715881257,-0.77285252,-1.6521743748  
H,0,5.5949832962,-2.2797805911,-2.2146784724  
H,0,3.1745357235,-5.6611991697,-1.2051666757  
H,0,5.3283699443,-4.7292649268,-1.9910546374  
C,0,2.1304164327,-1.0122905277,1.6523146836  
C,0,4.1873825285,-0.2339140639,3.3958563413  
C,0,2.9824457081,0.0458851555,1.3272365389  
C,0,2.3379612927,-1.6724747757,2.8673317923  
C,0,3.3505603265,-1.2890271807,3.7311035918  
C,0,3.9984646757,0.4269845023,2.1895021397  
H,0,2.8296699635,0.5811420992,0.3973594194  
H,0,1.6864354473,-2.4996745706,3.1332300803  
H,0,3.491440307,-1.81911963,4.6655201018  
H,0,4.6494632107,1.2486146818,1.9144592859  
H,0,4.9835601122,0.0663867667,4.0657703545  
O,0,-1.0856883787,-0.8773980912,2.3595066849  
H,0,-0.0749132649,-1.2018324702,1.5919263877  
C,0,-0.6995706036,-0.0530745305,3.4349488258  
H,0,-1.4547233204,0.7205784409,3.6244228132  
H,0,0.2588293874,0.4552901529,3.2551090289  
H,0,-0.5843050818,-0.6492439963,4.3468602041

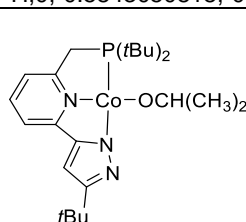

|                                               | PNNCo-OCH(CH <sub>3</sub> ) <sub>2</sub>      |
|-----------------------------------------------|-----------------------------------------------|
| Co,0,-0.8204787093,-0.2957745642,0.7128785262 | Co,0,-0.0966390735,-0.1606961876,1.0581789944 |
| P,0,-2.7995581514,-1.0466268446,-0.4979654409 | P,0,-0.0734907305,2.0448046346,0.7882589164   |
| N,0,-2.0339471993,1.1847542409,1.0747503724   | N,0,-1.6221685603,0.1986890392,2.249831353    |
| C,0,-3.5015513812,3.3636383083,1.8306702919   | C,0,-3.9192046979,0.4920773542,3.7519254149   |
| C,0,-1.4277152233,2.4024126635,1.1337854611   | C,0,-2.3378864025,-0.9059606862,2.6206046734  |
| C,0,-3.3596126503,1.0566978975,1.2132369497   | C,0,-2.0289922771,1.4284904223,2.622484884    |
| C,0,-4.1273307729,2.1382328299,1.6204851873   | C,0,-3.180487424,1.6077755741,3.3703240008    |
| C,0,-2.1549069481,3.5138714527,1.5568510467   | C,0,-3.4974032907,-0.7683994813,3.3836448855  |
| H,0,-5.19601844,2.0256309786,1.7435047825     | H,0,-3.4868963482,2.6063289591,3.6513561914   |
| H,0,-1.6682820506,4.4768526535,1.6298592567   | H,0,-4.0532585606,-1.6521514809,3.6652125483  |
| H,0,-4.0831922062,4.2156321124,2.1600619631   | H,0,-4.8220649522,0.6140542612,4.3369678661   |
| C,0,-3.9162556979,-0.266998541,0.7953062731   | C,0,-1.1455411183,2.5685004925,2.2119470261   |
| H,0,-4.9591390253,-0.1648798212,0.4882884773  | H,0,-0.4640862936,2.8014522945,3.0364306171   |
| H,0,-3.8807180462,-0.9789931469,1.6279992536  | H,0,-1.7206813751,3.4783049154,2.0255192912   |
| C,0,-3.5572935403,-2.7995077416,-0.6162558557 | C,0,-1.0174388817,2.5657806942,-0.7631565029  |
| C,0,-3.108021797,-0.1114163229,-2.1293380016  | C,0,1.5408555692,2.9822652457,1.0328475316    |
| C,0,-1.9997806489,-0.5434269849,-3.0963870257 | C,0,2.374231817,2.8846403055,-0.2427920985    |
| H,0,-2.076819931,0.0390936647,-4.0178387363   | H,0,3.381831459,3.2570268054,-0.0423838829    |
| H,0,-2.052352024,-1.5950244866,-3.3722834946  | H,0,1.9619770289,3.4911789212,-1.0503779438   |
| H,0,-1.0124869701,-0.3549307091,-2.6679243955 | H,0,2.4519812594,1.8473947958,-0.5743767082   |
| C,0,-2.9153211423,1.3861625922,-1.8804747045  | C,0,2.2688645615,2.2265013856,2.1481653307    |
| H,0,-2.9914505009,1.9069523386,-2.8383631874  | H,0,3.2182338732,2.7239861984,2.3612046649    |
| H,0,-1.9306723863,1.6037279564,-1.4662873959  | H,0,2.4717491843,1.1979278362,1.846013719     |
| H,0,-3.6758870679,1.8082496005,-1.2220821925  | H,0,1.697974256,2.2079825868,3.0798850787     |
| C,0,-4.484863761,-0.3208334178,-2.7478889782  | C,0,1.3444232705,4.4387763397,1.4420951139    |
| H,0,-4.5815233267,0.3068985572,-3.6381198875  | H,0,2.3222143531,4.8983053442,1.6075565399    |
| H,0,-5.2875064958,-0.0333284123,-2.0656037716 | H,0,0.7865467769,4.5370635229,2.3746404293    |
| H,0,-4.6593164086,-1.3485034012,-3.0625295201 | H,0,0.8351844924,5.0276501054,0.6811512185    |
| C,0,-3.1224889431,-3.4895271947,-1.9073237107 | C,0,-0.3910372304,1.8531500554,-1.9624563642  |
| H,0,-2.0381430384,-3.4801844882,-2.0325422708 | H,0,0.6147287977,2.2058508183,-2.1824420106   |
| H,0,-3.569603818,-3.0511161966,-2.7981159579  | H,0,-1.006032703,2.0270885722,-2.8487591989   |
| H,0,-3.4337116094,-4.5365739947,-1.8716136646 | C,0,-0.3255692365,0.7766991416,-1.7946229006  |
| C,0,-2.9918417721,-3.6067894677,0.5538724099  | C,0,-2.4415031598,2.0332440868,-0.5829552428  |
| H,0,-1.9050884267,-3.6823795925,0.5081261428  | H,0,-2.4505308248,0.9583069444,-0.3860965346  |
| H,0,-3.4074109456,-4.6167311617,0.520196072   | H,0,-3.007625311,2.2025785031,-1.5014257326   |
| H,0,-3.234672643,-3.1684553717,1.5211976203   | H,0,-2.9789133943,2.5289699132,0.227077872    |
| C,0,-5.0815958628,-2.8124551951,-0.5150858531 | C,0,-1.0598949935,4.0707804151,-0.991119922   |
| H,0,-5.5706463603,-2.2283257308,-1.2919766224 | H,0,-0.0766798297,4.476756098,-1.2287839477   |
| H,0,-5.4278800702,-2.4481806053,0.4521209074  | H,0,-1.4524629743,4.6122269285,-0.1277911482  |
| H,0,-5.4364854404,-3.8424488765,-0.6098478555 | H,0,-1.714007006,4.2952210088,-1.8377572335   |
| C,0,-0.0933201919,2.3555707649,0.6140154454   | O,0,1.4920788472,-0.2998737356,0.130389163    |
| N,0,0.2433561639,1.1607325632,0.0270638723    | C,0,-1.7745436144,-2.1243871781,2.1378203777  |
| C,0,0.9710842049,3.2363878757,0.4345663152    | N,0,-0.6355056535,-2.0008280737,1.392779723   |
| H,0,1.0404843253,4.2627966486,0.7552613382    | C,0,-2.0968898071,-3.4774765919,2.2254426706  |
| C,0,1.9190435796,2.4848330835,-0.2614555482   | H,0,-2.9317539734,-3.9269056786,2.7376798815  |
| N,0,1.4633500769,1.2328497593,-0.492490185    | C,0,-1.092710361,-4.1088363028,1.4954506555   |
| C,0,3.3023183297,2.8602337469,-0.7300631216   | N,0,-0.2225858362,-3.2015412697,0.9994515638  |
| C,0,3.4316323099,2.5581551622,-2.2252610842   | C,0,-0.8761145493,-5.5715858256,1.2023026804  |
| H,0,3.2288269046,1.5059336791,-2.4251355981   | C,0,-1.9876686074,-6.4092942862,1.8258784867  |
| H,0,4.4388564077,2.7905259848,-2.5786787777   | H,0,-2.0159514252,-6.2923370703,2.9109945387  |
| H,0,2.7243490742,3.1488044083,-2.8098026731   | H,0,-1.8334903601,-7.468212352,1.6115930888   |
| C,0,3.5654170262,4.3419724313,-0.4815318914   | H,0,-2.9672263002,-6.1309257747,1.4323065432  |
| H,0,3.5031392248,4.5868080047,0.5805378211    | C,0,-0.8647901566,-5.7796084581,-0.3152156824 |
| H,0,2.8486573521,4.9699897977,-1.0140201243   | H,0,-0.0895716501,-5.1695582929,-0.7794540416 |
| H,0,4.5650713823,4.6145587056,-0.8240444105   | H,0,-1.8213021516,-5.4967004262,-0.7582112379 |
| C,0,4.330347614,2.0242994329,0.0405133106     | H,0,-0.6754718062,-6.8271476455,-0.5608275419 |
| H,0,4.2813513617,2.2279573886,1.111506652     | C,0,0.4758947877,-6.0059841871,1.7757895741   |
| H,0,5.3441755227,2.2464157771,-0.3008040584   | H,0,0.5030860983,-5.8799508223,2.8594267835   |
| H,0,4.1471947463,0.9569846684,-0.0960207904   | H,0,1.2823751924,-5.4091126762,1.3499554422   |
| C,0,0.7153712066,-1.693769561,0.5759001024    | H,0,0.6700739173,-7.0577581535,1.5530194044   |
| C,0,0.664786982,-2.2515499091,-0.658723435    | C,0,2.0049830688,-1.5071446929,-0.3816552328  |
| C,0,1.7370040232,-2.5030962769,-1.616343986   | C,0,3.4761300287,-1.2759565839,-0.6829606566  |
| C,0,1.9505206662,-1.4957397619,1.3541801646   | H,0,1.9139999492,-2.3137740678,0.3597540605   |
| C,0,4.2449169413,-1.2186406007,2.9612328027   | C,0,1.2391710589,-1.9318228653,-1.6221606834  |
| C,0,2.1398510224,-0.3697907038,2.1654619481   | H,0,3.9558128584,-2.1839092962,-1.052683735   |
| C,0,2.9345375275,-2.4939237532,1.3975237757   | H,0,3.5914160406,-0.4985541441,-1.4425805112  |
| C,0,4.0655359609,-2.3548104849,2.1823176471   | H,0,4.0059700847,-0.9498693496,0.2128771633   |

|                                                                                                                                                                                                                                                                                                                                                                                                                                                                                                                                                                                                                                                                                                                                                                                                                                                                                                                                                                                                                                                                                                                                                                                                                                                                                                                                                                                                                                                                                                                                                           |                                                                                                                                                                                                                                                                                                                                                                                                                                                                                                                                                                                                                                                                                                                                                                                                                                                                                                                                                                                                                                                                                                                                                                                                                                                                                                                                                                                                                                                                                                                                                        |
|-----------------------------------------------------------------------------------------------------------------------------------------------------------------------------------------------------------------------------------------------------------------------------------------------------------------------------------------------------------------------------------------------------------------------------------------------------------------------------------------------------------------------------------------------------------------------------------------------------------------------------------------------------------------------------------------------------------------------------------------------------------------------------------------------------------------------------------------------------------------------------------------------------------------------------------------------------------------------------------------------------------------------------------------------------------------------------------------------------------------------------------------------------------------------------------------------------------------------------------------------------------------------------------------------------------------------------------------------------------------------------------------------------------------------------------------------------------------------------------------------------------------------------------------------------------|--------------------------------------------------------------------------------------------------------------------------------------------------------------------------------------------------------------------------------------------------------------------------------------------------------------------------------------------------------------------------------------------------------------------------------------------------------------------------------------------------------------------------------------------------------------------------------------------------------------------------------------------------------------------------------------------------------------------------------------------------------------------------------------------------------------------------------------------------------------------------------------------------------------------------------------------------------------------------------------------------------------------------------------------------------------------------------------------------------------------------------------------------------------------------------------------------------------------------------------------------------------------------------------------------------------------------------------------------------------------------------------------------------------------------------------------------------------------------------------------------------------------------------------------------------|
| <p>C,0,3.2714798464,-0.2301943774,2.9516777956<br/> H,0,1.3936656701,0.4179141852,2.1651893067<br/> H,0,2.7982611305,-3.3893490884,0.8024192113<br/> H,0,4.8101656034,-3.1418506194,2.1920827409<br/> H,0,3.3938679668,0.6597546123,3.557683967<br/> H,0,5.1286645936,-1.1116342969,3.5777783748<br/> O,0,-1.3757324197,-1.6455746992,2.1383640832<br/> H,0,-0.3743001449,-1.9080905751,1.4333380699<br/> C,0,-0.9795292606,-1.4833027247,3.5004388035<br/> C,0,-1.2302707767,-0.069772885,3.9861490768<br/> H,0,0.0975985056,-1.6923199665,3.5863819696<br/> C,0,-1.7446137151,-2.507883107,4.31478197<br/> H,0,-0.324738216,-2.5111740631,-1.0337105343<br/> C,0,2.8563315589,-1.6650111452,-1.6979075249<br/> C,0,3.8333405628,-1.8906046533,-2.6498933226<br/> C,0,3.7208798403,-2.9559849139,-3.5360958207<br/> C,0,1.6172458872,-3.5470997585,-2.5406188209<br/> C,0,2.6062342081,-3.7813430667,-3.4815537982<br/> H,0,2.9106782751,-0.8085179289,-1.0360376097<br/> H,0,4.6855983962,-1.2234585343,-2.7086509951<br/> H,0,4.4908036248,-3.1315324342,-4.2773695787<br/> H,0,0.7401341672,-4.1853562252,-2.5052162598<br/> H,0,2.5043333602,-4.6030808904,-4.1799479611<br/> H,0,-0.9654588295,0.0371883626,5.0390749759<br/> H,0,-0.6391158608,0.6531577142,3.420107645<br/> H,0,-2.2842424148,0.1963378841,3.8721448589<br/> H,0,-1.4609879426,-2.4745087686,5.3675619377<br/> H,0,-2.818261892,-2.3162561947,4.2463714434<br/> H,0,-1.5591772363,-3.51421005,3.940600813</p>                                                                     | <p>H,0,1.6061858257,-2.8805854344,-2.0195152474<br/> H,0,0.1825336533,-2.065129423,-1.3842022719<br/> H,0,1.3319920918,-1.1734311253,-2.4046550675</p>                                                                                                                                                                                                                                                                                                                                                                                                                                                                                                                                                                                                                                                                                                                                                                                                                                                                                                                                                                                                                                                                                                                                                                                                                                                                                                                                                                                                 |
| 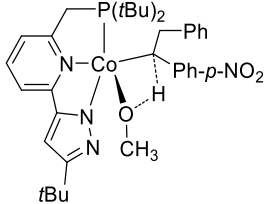 <p><b>TS5-para-NO<sub>2</sub>-1</b></p>                                                                                                                                                                                                                                                                                                                                                                                                                                                                                                                                                                                                                                                                                                                                                                                                                                                                                                                                                                                                                                                                                                                                                                                                                                                                                                                                                                                                                                |  <p><b>TS5-para-NO<sub>2</sub>-2</b></p>                                                                                                                                                                                                                                                                                                                                                                                                                                                                                                                                                                                                                                                                                                                                                                                                                                                                                                                                                                                                                                                                                                                                                                                                                                                                                                                                                                                                                            |
| <p>Co,0,-0.667469951,0.114347866,0.6625646285<br/> P,0,-2.5179971182,-1.0005247313,-0.3881635173<br/> N,0,-2.0156154958,1.4773189599,0.8788960284<br/> C,0,-3.7272938917,3.5253850263,1.4505989303<br/> C,0,-1.5673810252,2.756360985,0.7784792013<br/> C,0,-3.3087869058,1.1971211368,1.0922447043<br/> C,0,-4.195105385,2.2151568749,1.4105516639<br/> C,0,-2.420635604,3.8102496075,1.1031962655<br/> H,0,-5.2360568919,1.9854622013,1.5929234689<br/> H,0,-2.0607623988,4.8282486339,1.0471526699<br/> H,0,-4.4044581145,4.3305890747,1.7066743776<br/> C,0,-3.7054585688,-0.2229215734,0.8397108057<br/> H,0,-4.7554362256,-0.2801844123,0.5445532435<br/> H,0,-3.5790985009,-0.823159632,1.746036007<br/> C,0,-2.9854694486,-2.8424317649,-0.2363717143<br/> C,0,-3.0197363059,-0.3402948864,-2.1024457175<br/> C,0,-1.8975818202,-0.7150964382,-3.0746322354<br/> H,0,-2.1124660195,-0.2876904017,-4.0571012776<br/> H,0,-1.7819447714,-1.7892363248,-3.2059772134<br/> H,0,-0.9408558941,-0.308381662,-2.7406781208<br/> C,0,-3.059330972,1.1881421856,-2.0395814252<br/> H,0,-3.2481382543,1.5708173879,-3.0455556008<br/> H,0,-2.1083773376,-1.6038835005,-1.7049532077<br/> H,0,-3.8546371449,1.5666526446,-1.3959884129<br/> C,0,-4.3655535995,-0.8398628452,-2.6129734704<br/> H,0,-4.5985729771,-0.3471379021,-3.5607975207<br/> H,0,-5.1792045577,-0.6076222435,-1.9231003837<br/> H,0,-4.3752927258,-1.9125144265,-2.8013473965<br/> C,0,-2.4497325594,-3.6263152666,-1.4318962666<br/> H,0,-1.3851917805,-3.4440906593,-1.5953735719</p> | <p>Co,0,-0.6740295981,0.090311557,0.6615648439<br/> P,0,-2.5405052533,-0.9946772985,-0.3934228661<br/> N,0,-2.0097473651,1.4695839138,0.8824696051<br/> C,0,-3.697335205,3.5334922735,1.4685584536<br/> C,0,-1.5493420117,2.7438809829,0.7815358193<br/> C,0,-3.3043427889,1.2025215761,1.1019897756<br/> C,0,-4.1790440611,2.2282363278,1.4281060452<br/> C,0,-2.3898444392,3.8058234225,1.1136822315<br/> H,0,-5.2213160571,2.0088723221,1.6157275928<br/> H,0,-2.0207128195,4.8205053699,1.0568801649<br/> H,0,-4.3645834262,4.3451098248,1.7305081022<br/> C,0,-3.7147127682,-0.2130546824,0.8459537275<br/> H,0,-4.7668716977,-0.2606665863,0.5568473072<br/> H,0,-3.5870347819,-0.818647738,1.74852242<br/> C,0,-3.0272486319,-2.8330392369,-0.2482118555<br/> C,0,-3.051827078,-0.321185243,-2.1001688869<br/> C,0,-1.9471942147,-0.7083084571,-3.0875670381<br/> H,0,-2.1651747788,-0.2695753488,-4.0643598059<br/> H,0,-1.8519594451,-1.7831952246,-3.2286389672<br/> H,0,-0.9801163774,-0.3200661809,-2.7611709532<br/> C,0,-3.0678832847,1.2074950922,-2.0321013334<br/> H,0,-3.2634198717,1.5962154503,-3.0345310096<br/> H,0,-2.1068055059,1.6078233499,-1.7075992564<br/> H,0,-3.8493745472,1.59550238,-1.3774666232<br/> C,0,-4.4110719233,-0.7998731921,-2.5948934643<br/> H,0,-4.6487824836,-0.303294931,-3.5395893719<br/> H,0,-5.2125695718,-0.5560167079,-1.8948168065<br/> H,0,-4.4392195009,-1.8722261432,-2.7829176319<br/> C,0,-2.5224883705,-3.6155797286,-1.457795841<br/> H,0,-1.4588464134,-3.4450191884,-1.6387068807</p> |

|                                               |                                               |
|-----------------------------------------------|-----------------------------------------------|
| H,0,-2.9786299206,-3.4044229974,-2.3579407136 | H,0,-3.0639808552,-3.3811810654,-2.3733376612 |
| H,0,-2.5691240165,-4.6956459897,-1.2407582959 | H,0,-2.6513684974,-4.6846732227,-1.2716110402 |
| C,0,-2.2789296272,-3.359297959,1.0176965393   | C,0,-2.3029847592,-3.3656785193,0.9889682927  |
| H,0,-1.1947787708,-3.3106689659,0.9122407318  | H,0,-1.2203581119,-3.3212408269,0.8645737803  |
| H,0,-2.5527022972,-4.4052567382,1.1780165728  | H,0,-2.5799856748,-4.4113944887,1.1455248372  |
| H,0,-2.5360785575,-2.7961240087,1.9139053373  | H,0,-2.5402845427,-2.808183826,1.8941281005   |
| C,0,-4.4849953453,-3.0863418186,-0.0797316335 | C,0,-4.5264414978,-3.0619375822,-0.0672177288 |
| H,0,-5.0718912325,-2.7149300526,-0.9169267532 | H,0,-5.1237704311,-2.6750599327,-0.8901429151 |
| H,0,-4.8766850805,-2.6393511121,0.8340493441  | H,0,-4.8966275175,-2.6195279529,0.8576097622  |
| H,0,-4.6655853877,-4.1622270981,-0.0076787043 | H,0,-4.7184487467,-4.1363476596,-0.0028312239 |
| C,0,-0.2614547327,2.818322843,0.195434821     | C,0,-0.2471235991,2.7933601249,0.188207526    |
| N,0,0.2481467775,1.6128217008,-0.2148301205   | N,0,0.2465912628,1.5845028083,-0.2309296838   |
| C,0,0.6001640004,3.8255085731,-0.2290749565   | C,0,0.6177938869,3.7947054472,-0.2444303887   |
| H,0,0.4965999249,4.8879976347,-0.0840560316   | H,0,0.5239317802,4.8577510015,-0.0965820151   |
| C,0,1.6178452244,3.1436990337,-0.893397903    | C,0,1.6205051566,3.1061852353,-0.923716623    |
| N,0,1.3879184914,1.8115676331,-0.8733816371   | N,0,1.3787504008,1.7761020199,-0.9049913647   |
| C,0,2.8510813416,3.6759222182,-1.5788147651   | C,0,2.857306836,3.6290451148,-1.609867507     |
| C,0,2.8860274028,5.1986760063,-1.4952689809   | C,0,2.8758012654,5.154038167,-1.576175054     |
| H,0,2.0153688955,5.6453404094,-1.9789403913   | H,0,2.0052439782,5.5753013014,-2.0822069549   |
| H,0,3.7761953009,5.5867244944,-1.9925266723   | H,0,3.7672243619,5.5353226977,-2.0766393581   |
| H,0,2.9094871792,5.5425045011,-0.4596360409   | H,0,2.8851855551,5.531747772,-0.5520978255    |
| C,0,4.0954916585,3.1003689994,-0.8952000341   | C,0,4.0964418479,3.090988484,-0.8864297992    |
| H,0,4.1057394693,2.0113851565,-0.9619647919   | H,0,4.1188728574,2.0005857169,-0.9137190294   |
| H,0,4.1274410716,3.3739844861,0.1608489716    | H,0,4.1058710865,3.3994102784,0.1605562574    |
| H,0,5.0053302681,3.4754835436,-1.3683587744   | H,0,5.0106000371,3.4598289059,-1.3566608263   |
| C,0,2.8418645529,3.2427017794,-3.0474511645   | C,0,2.8776993545,3.1474260712,-3.0627832469   |
| H,0,2.8053482635,2.1561801849,-3.1290050759   | H,0,2.8521103444,2.0585292659,-3.1089586542   |
| H,0,3.7398625109,3.5959234759,-3.5588885728   | H,0,3.7811093008,3.4922347616,-3.570418761    |
| H,0,1.9743161578,3.6460634387,-3.5721457555   | H,0,2.0155707951,3.5244041034,-3.6151546205   |
| C,0,0.9957180138,-1.4438867104,0.7986673094   | C,0,0.9817819633,-1.4604441251,0.7959158927   |
| H,0,0.7723228748,-2.4868104907,1.0717130985   | H,0,0.7582589335,-2.5048361962,1.0659811995   |
| C,0,1.24233777,-1.4530403382,-0.7188904293    | C,0,1.233707794,-1.469912623,-0.7207748604    |
| H,0,1.4411687867,-0.4471728462,-1.0911876577  | H,0,1.4078866785,-0.4618698768,-1.098836377   |
| H,0,0.3234629776,-1.789505255,-1.2093606862   | H,0,0.329953622,-1.8410725885,-1.2147610146   |
| C,0,2.3766584396,-2.365935542,-1.100097299    | C,0,2.3973671764,-2.3462232856,-1.0888640176  |
| C,0,4.4994285604,-4.0660912837,-1.7567891125  | C,0,4.5618575228,-3.9552123893,-1.7103343843  |
| C,0,2.2543780716,-3.7480693633,-0.9624203608  | C,0,2.325691438,-3.7320217654,-0.9297374056   |
| C,0,3.5800941213,-1.8516907395,-1.5748118374  | C,0,3.5828186535,-1.7895537817,-1.5684401743  |
| C,0,4.6342725694,-2.6935546172,-1.9004772118  | C,0,4.6700166088,-2.5853819566,-1.8816603284  |
| C,0,3.3030069327,-4.5928930261,-1.2884433393  | C,0,3.3985607578,-4.5445820179,-1.2391277859  |
| H,0,1.3189425815,-4.1650609267,-0.5982761779  | H,0,1.4074664226,-4.1776225967,-0.5599196931  |
| H,0,3.6826722866,-0.7773213409,-1.6913522358  | H,0,3.6428184128,-0.7142166198,-1.6961993407  |
| H,0,5.5641781577,-2.2756477582,-2.2665173815  | H,0,5.596651069,-2.1706539377,-2.2529130768   |
| H,0,3.1884719216,-5.6646753481,-1.1796673943  | H,0,3.358465922,-5.6189584714,-1.1273932906   |
| H,0,5.3213137927,-4.7240456488,-2.0100488953  | N,0,5.7119944545,-4.8126956783,-2.0445317024  |
| C,0,2.1344663542,-1.0121157954,1.6552480932   | C,0,2.1275456985,-1.0324302372,1.6563183472   |
| C,0,4.1792724656,-0.2092492296,3.3552747568   | C,0,4.2030968426,-0.2308975692,3.3667362879   |
| C,0,2.9951448633,0.0319352117,1.2960972446    | C,0,2.9783341517,0.0186341421,1.3069852535    |
| C,0,2.3386255134,-1.642949946,2.8905212661    | C,0,2.3455872293,-1.674898876,2.8788194787    |
| C,0,3.3497261658,-1.2504892001,3.7431133521   | C,0,3.3677195846,-1.2792329566,3.7261901793   |
| C,0,4.0136023586,0.4341157993,2.1378614347    | C,0,4.0036160854,0.4118453586,2.1526492042    |
| H,0,2.8420106513,0.5440964741,0.3537331732    | H,0,2.8172509852,0.5413273631,0.3714707757    |
| H,0,1.6833792341,-2.4581783665,3.1791452942   | H,0,1.6960293422,-2.4971048152,3.1643189728   |
| H,0,3.5159040624,-1.7330290729,4.6959889433   | H,0,3.5172186408,-1.7954638471,4.6668503882   |
| H,0,4.6849149786,1.2382944982,1.8702794704    | H,0,4.6526008083,1.2280598325,1.8576688477    |
| N,0,5.2599141572,0.2167083232,4.2531854971    | H,0,5.006466662,0.0772709716,4.0241250945     |
| O,0,-1.0965647766,-0.8807421442,2.3570866007  | O,0,-1.108471473,-0.9059109734,2.3527528013   |
| H,0,-0.0721644596,-1.2106907071,1.5994593388  | H,0,-0.0910702621,-1.2343463381,1.5944477813  |
| C,0,-0.7211674016,-0.0589554803,3.4381314178  | C,0,-0.7264452425,-0.0941225443,3.4398232479  |
| H,0,-1.4821714039,0.7079035561,3.6291482142   | H,0,-1.4826643097,0.6764140622,3.6356301027   |
| H,0,0.232800118,0.4604407767,3.2628947744     | H,0,0.2320508842,0.4169976022,3.2690481868    |
| H,0,-0.603713237,-0.6579757705,4.3477309924   | H,0,-0.6143636727,-0.7013348476,4.3445739789  |
| O,0,5.981861241,1.1352969422,3.8821553559     | O,0,6.7254687073,-4.2676511387,-2.4629077036  |
| O,0,5.3761310804,-0.36950822,5.3242287004     | O,0,5.5856153062,-6.0206701845,-1.8844558375  |

|                                                                                                                                                                                                                                                                                                                                                                                                                                                                                                                                                                                                                                                                                                                                                                                                                                                                                                                                                                                                                                                                                                                                                                                                                                                                                                                                                                                                                                                                                                                                                                                                                                                                                                                                                                                                                                                                                                                                                                                                                                                                                                                                                                                                                                                                                                                                                                                                                                                                                                                                                                                                                                                                                                                                                                                                                                                                                                                                                                                                                                             |                                                                                                                                                                                                                                                                                                                                                                                                                                                                                                                                                                                                                                                                                                                                                                                                                                                                                                                                                                                                                                                                                                                                                                                                                                                                                                                                                                                                                                                                                                                                                                                                                                                                                                                                                                                                                                                                                                                                                                                                                                                                                                                                                                                                                                                                                                                                                                                                                                                                                                                                                                                                                                                                                                                                                                                                                                                                                                                                                                                                                                          |
|---------------------------------------------------------------------------------------------------------------------------------------------------------------------------------------------------------------------------------------------------------------------------------------------------------------------------------------------------------------------------------------------------------------------------------------------------------------------------------------------------------------------------------------------------------------------------------------------------------------------------------------------------------------------------------------------------------------------------------------------------------------------------------------------------------------------------------------------------------------------------------------------------------------------------------------------------------------------------------------------------------------------------------------------------------------------------------------------------------------------------------------------------------------------------------------------------------------------------------------------------------------------------------------------------------------------------------------------------------------------------------------------------------------------------------------------------------------------------------------------------------------------------------------------------------------------------------------------------------------------------------------------------------------------------------------------------------------------------------------------------------------------------------------------------------------------------------------------------------------------------------------------------------------------------------------------------------------------------------------------------------------------------------------------------------------------------------------------------------------------------------------------------------------------------------------------------------------------------------------------------------------------------------------------------------------------------------------------------------------------------------------------------------------------------------------------------------------------------------------------------------------------------------------------------------------------------------------------------------------------------------------------------------------------------------------------------------------------------------------------------------------------------------------------------------------------------------------------------------------------------------------------------------------------------------------------------------------------------------------------------------------------------------------------|------------------------------------------------------------------------------------------------------------------------------------------------------------------------------------------------------------------------------------------------------------------------------------------------------------------------------------------------------------------------------------------------------------------------------------------------------------------------------------------------------------------------------------------------------------------------------------------------------------------------------------------------------------------------------------------------------------------------------------------------------------------------------------------------------------------------------------------------------------------------------------------------------------------------------------------------------------------------------------------------------------------------------------------------------------------------------------------------------------------------------------------------------------------------------------------------------------------------------------------------------------------------------------------------------------------------------------------------------------------------------------------------------------------------------------------------------------------------------------------------------------------------------------------------------------------------------------------------------------------------------------------------------------------------------------------------------------------------------------------------------------------------------------------------------------------------------------------------------------------------------------------------------------------------------------------------------------------------------------------------------------------------------------------------------------------------------------------------------------------------------------------------------------------------------------------------------------------------------------------------------------------------------------------------------------------------------------------------------------------------------------------------------------------------------------------------------------------------------------------------------------------------------------------------------------------------------------------------------------------------------------------------------------------------------------------------------------------------------------------------------------------------------------------------------------------------------------------------------------------------------------------------------------------------------------------------------------------------------------------------------------------------------------------|
| 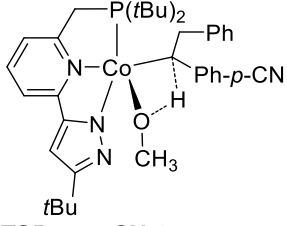 <p><b>TS5-para-CN-1</b></p>                                                                                                                                                                                                                                                                                                                                                                                                                                                                                                                                                                                                                                                                                                                                                                                                                                                                                                                                                                                                                                                                                                                                                                                                                                                                                                                                                                                                                                                                                                                                                                                                                                                                                                                                                                                                                                                                                                                                                                                                                                                                                                                                                                                                                                                                                                                                                                                                                                                                                                                                                                                                                                                                                                                                                                                                                                                                                                                               |  <p><b>TS5-para-CN-2</b></p>                                                                                                                                                                                                                                                                                                                                                                                                                                                                                                                                                                                                                                                                                                                                                                                                                                                                                                                                                                                                                                                                                                                                                                                                                                                                                                                                                                                                                                                                                                                                                                                                                                                                                                                                                                                                                                                                                                                                                                                                                                                                                                                                                                                                                                                                                                                                                                                                                                                                                                                                                                                                                                                                                                                                                                                                                                                                                                                           |
| <p>Co,0,-0.6705696212,0.0978573303,0.6661339939<br/> P,0,-2.5287484599,-0.9950278716,-0.3944399104<br/> N,0,-2.0079411293,1.4718194111,0.8831026772<br/> C,0,-3.7013097315,3.5298290796,1.4731533117<br/> C,0,-1.5493504172,2.747635791,0.7902913308<br/> C,0,-3.3025920677,1.200870426,1.0983488616<br/> C,0,-4.179978462,2.2237166387,1.4260859373<br/> C,0,-2.3932883184,3.8063061307,1.1237564589<br/> H,0,-5.2221561555,2.001188364,1.6103856262<br/> H,0,-2.0253147015,4.8217401819,1.0738597672<br/> H,0,-4.3709985338,4.3388408749,1.736826278<br/> C,0,-3.7103832307,-0.2148300756,0.8383296379<br/> H,0,-4.7608219935,-0.2624428103,0.5428066223<br/> H,0,-3.5890837307,-0.8208484546,1.7413750479<br/> C,0,-3.0078012078,-2.8351631816,-0.2494656539<br/> C,0,-3.0345544323,-0.3245978657,-2.1036767601<br/> C,0,-1.9239938791,-0.7080633905,-3.0856609943<br/> H,0,-2.1403931799,-0.272569087,-4.0642513291<br/> H,0,-1.8227496475,-1.7827533884,-3.2236609582<br/> H,0,-0.9598239447,-0.3152534099,-2.7564677793<br/> C,0,-3.0579126381,1.2039226762,-2.0357477714<br/> H,0,-3.2486839709,1.5919873018,-3.0393112189<br/> H,0,-2.1009763826,1.6088561168,-1.704944809<br/> H,0,-3.8454789369,1.5884548111,-1.3862998208<br/> C,0,-4.3897715576,-0.8091243245,-2.6035760964<br/> H,0,-4.6262527875,-0.3129575211,-3.5487728339<br/> H,0,-5.1948324307,-0.5693024308,-1.9061787479<br/> H,0,-4.4119707055,-1.8814046869,-2.7923147445<br/> C,0,-2.4955568027,-3.6172165931,-1.4563206467<br/> H,0,-1.4316579609,-3.444494018,-1.6330828588<br/> H,0,-3.0346127684,-3.3857738642,-2.3740735269<br/> H,0,-2.6223995102,-4.686335189,-1.2688739836<br/> C,0,-2.2875211705,-3.3647767131,0.9913308226<br/> H,0,-1.2045393104,-3.323882953,0.8693885981<br/> H,0,-2.5668406248,-4.4095670647,1.1498690826<br/> H,0,-2.5268767005,-2.8041566343,1.8940663103<br/> C,0,-4.5069813396,-3.0683268961,-0.0739287649<br/> H,0,-5.1022057249,-2.6858317675,-0.9003262161<br/> H,0,-4.8825473356,-2.6247676131,0.8482133739<br/> H,0,-4.6955086671,-4.1432194818,-0.0075060632<br/> C,0,-0.2434747139,2.8025957169,0.2060717569<br/> N,0,0.2590949866,1.595230128,-0.2067562675<br/> C,0,0.6203857833,3.8067131124,-0.2216850242<br/> H,0,0.5210201417,4.8695891138,-0.076437999<br/> C,0,1.6313995148,3.1211605786,-0.8920332022<br/> N,0,1.3960163437,1.7899556162,-0.871587328<br/> C,0,2.8642635719,3.6485620593,-1.5819211669<br/> C,0,2.8896203296,5.1728010611,-1.5261453796<br/> H,0,2.0173342813,5.6050702979,-2.0197646769<br/> H,0,3.7788241291,5.5573668365,-2.0278891483<br/> H,0,2.9082937936,5.5355763553,-0.4968616713<br/> C,0,4.1093673484,3.0942969488,-0.8820058227<br/> H,0,4.1261042712,2.0042651089,-0.925968019<br/> H,0,4.1348252424,3.3903050695,0.1682403281<br/> H,0,5.0190157435,3.4650300191,-1.3591968534<br/> C,0,2.8653138454,3.1877201691,-3.0420151825<br/> H,0,2.8367295704,2.0995689315,-3.103049197<br/> H,0,3.7632574829,3.537804097,-3.555710017<br/> H,0,1.9973556053,3.5747064569,-3.5781701979</p> | <p>Co,0,-0.6722007294,0.1049894334,0.6520152928<br/> P,0,-2.5270990442,-1.0000550033,-0.3854791274<br/> N,0,-2.0155627267,1.4772131057,0.8669237335<br/> C,0,-3.7134966976,3.534653909,1.4483297439<br/> C,0,-1.5609246525,2.7535793203,0.7657475877<br/> C,0,-3.3088256403,1.2045956377,1.0879409341<br/> C,0,-4.1886702677,2.2269416937,1.4105308775<br/> C,0,-2.4067586552,3.812225422,1.0951990668<br/> H,0,-5.2298379519,2.0028169252,1.5986827957<br/> H,0,-2.0417292275,4.8283735811,1.0382243997<br/> H,0,-4.38496533,4.3435670431,1.7078341123<br/> C,0,-3.7121802205,-0.2145530385,0.839828197<br/> H,0,-4.7624603738,-0.2689568422,0.5446731594<br/> H,0,-3.5887728303,-0.8121149174,1.7483101667<br/> C,0,-2.9988140606,-2.8401932366,-0.2245137854<br/> C,0,-3.0330958302,-0.3473491802,-2.1022105147<br/> C,0,-1.912722483,-0.7255213216,-3.075274959<br/> H,0,-2.131170156,-0.3049762127,-4.0599555238<br/> H,0,-1.7948307211,-1.8003547992,-3.2001749721<br/> H,0,-0.9563463608,-0.3137337686,-2.7463473926<br/> C,0,-3.0739934974,1.1813084795,-2.0467346331<br/> H,0,-3.2679551169,1.5587183191,-3.0537769431<br/> H,0,-2.1220868038,1.5998552645,-1.7185021207<br/> H,0,-3.8664943381,1.5622522519,-1.4011451932<br/> C,0,-4.3791184319,-0.8506888311,-2.6084253663<br/> H,0,-4.6133229475,-0.3643865445,-3.5593254394<br/> H,0,-5.1925586837,-0.6146589232,-1.9195749995<br/> H,0,-4.3879337136,-1.9245730613,-2.7893875953<br/> C,0,-2.4643020209,-3.6302188524,-1.4163753868<br/> H,0,-1.3997187753,-3.4478739321,-1.5805450126<br/> H,0,-2.992639662,-3.4121289013,-2.3436125414<br/> H,0,-2.583519396,-4.6987866901,-1.2207856294<br/> C,0,-2.2923422342,-3.3521120667,1.0315497909<br/> H,0,-1.2081393446,-3.3041150303,0.9260305143<br/> H,0,-2.5672965576,-4.3970037519,1.1970369429<br/> H,0,-2.5482050537,-2.7843321252,1.9251665453<br/> C,0,-4.4985800865,-3.0813028826,-0.0659123153<br/> H,0,-5.085690166,-2.7143269784,-0.9048820248<br/> H,0,-4.8888366589,-2.6274806315,0.8451356514<br/> H,0,-4.6810766377,-4.1564017015,0.0132937753<br/> C,0,-0.2568901973,2.8102131747,0.1774706365<br/> N,0,0.247434512,1.6045370556,-0.2378928183<br/> C,0,0.6051356256,3.8172633001,-0.2476569631<br/> H,0,0.503780621,4.879613753,-0.099682349<br/> C,0,1.6178242242,3.1352522352,-0.9185300582<br/> N,0,1.3845162023,1.8036628061,-0.9018414162<br/> C,0,2.8533060867,3.662022008,-1.6008899544<br/> C,0,2.8790057376,5.1900942314,-1.5367064927<br/> H,0,2.0084225816,5.6251754456,-2.0308595899<br/> H,0,3.7700792444,5.577427195,-2.0331145961<br/> H,0,2.8935157988,5.5469395955,-0.5052504875<br/> C,0,4.0945233895,3.1073595674,-0.8976118046<br/> H,0,4.1087228651,2.0174840981,-0.9439703186<br/> H,0,4.1147206666,3.3974788022,0.1543886482<br/> H,0,5.0071828474,3.4783961784,-1.369023207<br/> C,0,2.8611139644,3.2140779533,-3.063550593<br/> H,0,2.8301873276,2.1264107117,-3.1311934845<br/> H,0,3.7623883645,3.5649701501,-3.5709160612<br/> H,0,1.9967091276,3.6059787732,-3.6018493512</p> |

|                                                                                                                                                                                                                                                                                                                                                                                                                                                                                                                                                                                                                                                                                                                                                                                                                                                                                                                                                                                                                                                                                                                                                                                                                                                                                                                                                                                                                                                                                                                                                                                                                                                                                                                                     |                                                                                                                                                                                                                                                                                                                                                                                                                                                                                                                                                                                                                                                                                                                                                                                                                                                                                                                                                                                                                                                                                                                                                                                                                                                                                                                                                                                                                                                                                                                                                                                                                                                                                                                                   |
|-------------------------------------------------------------------------------------------------------------------------------------------------------------------------------------------------------------------------------------------------------------------------------------------------------------------------------------------------------------------------------------------------------------------------------------------------------------------------------------------------------------------------------------------------------------------------------------------------------------------------------------------------------------------------------------------------------------------------------------------------------------------------------------------------------------------------------------------------------------------------------------------------------------------------------------------------------------------------------------------------------------------------------------------------------------------------------------------------------------------------------------------------------------------------------------------------------------------------------------------------------------------------------------------------------------------------------------------------------------------------------------------------------------------------------------------------------------------------------------------------------------------------------------------------------------------------------------------------------------------------------------------------------------------------------------------------------------------------------------|-----------------------------------------------------------------------------------------------------------------------------------------------------------------------------------------------------------------------------------------------------------------------------------------------------------------------------------------------------------------------------------------------------------------------------------------------------------------------------------------------------------------------------------------------------------------------------------------------------------------------------------------------------------------------------------------------------------------------------------------------------------------------------------------------------------------------------------------------------------------------------------------------------------------------------------------------------------------------------------------------------------------------------------------------------------------------------------------------------------------------------------------------------------------------------------------------------------------------------------------------------------------------------------------------------------------------------------------------------------------------------------------------------------------------------------------------------------------------------------------------------------------------------------------------------------------------------------------------------------------------------------------------------------------------------------------------------------------------------------|
| <p>C,0,0.9831818542,-1.4616302718,0.8050186823<br/> H,0,0.760460002,-2.5039912526,1.0813964952<br/> C,0,1.2300413659,-1.4761811419,-0.7124164682<br/> H,0,1.3999230013,-0.4684822267,-1.0937276111<br/> H,0,0.3198351127,-1.843138779,-1.1977862347<br/> C,0,2.3920949539,-2.3543494178,-1.0925348568<br/> C,0,4.5716483132,-3.9795637349,-1.7529975314<br/> C,0,2.3334121237,-3.7357707838,-0.9134521446<br/> C,0,3.5606614629,-1.8028684103,-1.6107764107<br/> C,0,4.6429441895,-2.6072783985,-1.9384842368<br/> C,0,3.4104761427,-4.5434142224,-1.241141203<br/> H,0,1.425996653,-4.1823985822,-0.5154369466<br/> H,0,3.6125004948,-0.7285357399,-1.7590947491<br/> H,0,5.5450997444,-2.160426062,-2.3383163319<br/> H,0,3.3455909539,-5.615532285,-1.099671596<br/> H,0,5.4154926668,-4.608689749,-2.0073727163<br/> C,0,2.1238954416,-1.0279954537,1.6606139961<br/> C,0,4.1969078577,-0.2074028612,3.3712061659<br/> C,0,2.9865537636,0.0102791967,1.2960986805<br/> C,0,2.3315867838,-1.6494114125,2.8979702173<br/> C,0,3.3450267502,-1.2514697762,3.7452321385<br/> C,0,4.0058715106,0.4163354623,2.1337837258<br/> H,0,2.8348404533,0.5157259216,0.3501201848<br/> H,0,1.6772189879,-2.4625899229,3.1949423721<br/> H,0,3.4919131937,-1.7453377456,4.6969995288<br/> H,0,4.6655581548,1.221250606,1.8358455664<br/> C,0,5.2438951155,0.2099082848,4.235556963<br/> O,0,-1.1117272065,-0.8985890681,2.358459578<br/> H,0,-0.0883331695,-1.2297655296,1.6059412659<br/> C,0,-0.7408210819,-0.0806840611,3.4441111561<br/> H,0,-1.5001221146,0.6888868772,3.6311725875<br/> H,0,0.2166061236,0.4347093498,3.2777479077<br/> H,0,-0.6335148921,-0.6823381945,4.3532773123<br/> N,0,6.0962401912,0.5518498034,4.9430273315</p> | <p>C,0,0.98664768,-1.4443417295,0.7872289208<br/> H,0,0.755815543,-2.489700252,1.0466382732<br/> C,0,1.2450532175,-1.4414883703,-0.728413476<br/> H,0,1.4448438454,-0.4324932911,-1.0913255<br/> H,0,0.3352664351,-1.7838529718,-1.2318728125<br/> C,0,2.3879542193,-2.3426622972,-1.1021638167<br/> C,0,4.5349220197,-4.0236090152,-1.7418220022<br/> C,0,2.2672370168,-3.7290049506,-0.997782572<br/> C,0,3.6031625029,-1.8144783898,-1.5333066785<br/> C,0,4.6680640177,-2.6371929138,-1.8504741974<br/> C,0,3.3187815659,-4.5657977805,-1.3131745878<br/> H,0,1.3257231032,-4.1565760436,-0.6660161545<br/> H,0,3.7054507681,-0.7384333371,-1.621865027<br/> H,0,5.6081852641,-2.2169334043,-2.1830672112<br/> H,0,3.2132785287,-5.6400088307,-1.2347239467<br/> C,0,5.6221827817,-4.8784230148,-2.0710035449<br/> C,0,2.1320461068,-1.0300983747,1.6547677104<br/> C,0,4.200801049,-0.250612958,3.3830808901<br/> C,0,2.9749469091,0.0350094166,1.3284515563<br/> C,0,2.3538632066,-1.6966916031,2.8634880136<br/> C,0,3.3728894172,-1.3122349635,3.7197579855<br/> C,0,3.9971144037,0.4167176958,2.1829657644<br/> H,0,2.8097986105,0.5778713328,0.4051420833<br/> H,0,1.7089882758,-2.5284807567,3.1311068024<br/> H,0,3.5254198327,-1.8469747779,4.6495351479<br/> H,0,4.640407603,1.2440319858,1.9073139224<br/> H,0,5.0015056252,0.0494708877,4.0474627683<br/> O,0,-1.0901420106,-0.8757965631,2.3585956259<br/> H,0,-0.0774574849,-1.2078382119,1.5922944218<br/> C,0,-0.6970118421,-0.0529656909,3.4330097304<br/> H,0,-1.4458693296,0.726563783,3.6225743891<br/> H,0,0.2651906887,0.4477871018,3.2516445591<br/> H,0,-0.5855050092,-0.6493436866,4.3450883298<br/> N,0,6.5064095353,-5.577237414,-2.3406719178</p> |
| 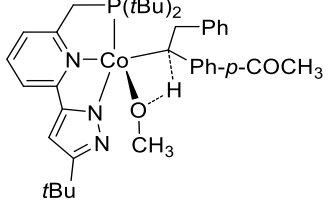 <p><b>TS5-para-COCH<sub>3</sub>-1</b></p>                                                                                                                                                                                                                                                                                                                                                                                                                                                                                                                                                                                                                                                                                                                                                                                                                                                                                                                                                                                                                                                                                                                                                                                                                                                                                                                                                                                                                                                                                                                                                                                                       |  <p><b>TS5-para-COCH<sub>3</sub>-1</b></p>                                                                                                                                                                                                                                                                                                                                                                                                                                                                                                                                                                                                                                                                                                                                                                                                                                                                                                                                                                                                                                                                                                                                                                                                                                                                                                                                                                                                                                                                                                                                                                                                    |
| <p>Co,0,-0.6702173199,0.1013515176,0.659767229<br/> P,0,-2.5227059346,-0.9991991471,-0.3958153285<br/> N,0,-2.0165105036,1.4683152083,0.8823264004<br/> C,0,-3.7200456448,3.51887168,1.4691371948<br/> C,0,-1.5634580438,2.7462291208,0.7894384007<br/> C,0,-3.3102010424,1.1916575701,1.095677847<br/> C,0,-4.192992309,2.2105112915,1.4211653214<br/> C,0,-2.4126459014,3.8012241603,1.1226648274<br/> H,0,-5.2346950879,1.9835811765,1.602922873<br/> H,0,-2.049215094,4.8183301466,1.0730944175<br/> H,0,-4.3940229374,4.3249806169,1.7309393937<br/> C,0,-3.7105464035,-0.2260090329,0.8350089984<br/> H,0,-4.7604345948,-0.2793084149,0.5384911315<br/> H,0,-3.5866035382,-0.8315262073,1.7381463696<br/> C,0,-2.9948913828,-2.8407227434,-0.2544302461<br/> C,0,-3.0243777972,-0.3291429277,-2.1066654482<br/> C,0,-1.903662457,-0.7011514683,-3.0815519459<br/> H,0,-2.1165546256,-0.2652633295,-4.0607796149<br/> H,0,-1.7926150595,-1.7747460199,-3.2210413595<br/> H,0,-0.9452670163,-0.3012684099,-2.7441565106<br/> C,0,-3.0603874406,1.199063473,-2.0356554875<br/> H,0,-3.2496421762,1.5875035297,-3.039396287<br/> H,0,-2.1080826169,1.6106937326,-1.6998087415<br/> H,0,-3.8538485473,1.5759396019,-1.3887933884<br/> C,0,-4.371686677,-0.8227899006,-2.619019856</p>                                                                                                                                                                                                                                                                                                                                                                                                                                              | <p>Co,0,-0.6658864913,0.1049334261,0.6562606598<br/> P,0,-2.5203228439,-0.9967926499,-0.3928224566<br/> N,0,-2.0148662059,1.4715605274,0.8798974901<br/> C,0,-3.7191445809,3.5191909634,1.4764633196<br/> C,0,-1.5652047049,2.7500855513,0.784324003<br/> C,0,-3.3067438607,1.1928347057,1.1012249226<br/> C,0,-4.1897392647,2.2099790345,1.4321172418<br/> C,0,-2.4143222909,3.8037298912,1.1215616355<br/> H,0,-5.2297837904,1.981075884,1.6208169601<br/> H,0,-2.0535264423,4.8216589604,1.069057438<br/> H,0,-4.3929295749,4.3241801477,1.7422105211<br/> C,0,-3.7050341776,-0.2260742823,0.8432506325<br/> H,0,-4.7562150009,-0.2825576654,0.5517907569<br/> H,0,-3.5744989079,-0.8307915619,1.7460146728<br/> C,0,-2.9844154192,-2.8403432386,-0.2471615684<br/> C,0,-3.0359235628,-0.3313451492,-2.1017635433<br/> C,0,-1.9191363782,-0.6972022243,-3.0833643091<br/> H,0,-2.1414697964,-0.2646707249,-4.0620130784<br/> H,0,-1.8012744059,-1.7702435057,-3.2217626804<br/> H,0,-0.9617194492,-0.2892939869,-2.7526666748<br/> C,0,-3.0811768163,1.1966256923,-2.0325536615<br/> H,0,-3.2820491885,1.582588617,-3.0350443005<br/> H,0,-2.12842815,1.6146531828,-1.7059099122<br/> H,0,-3.8711069078,1.5691477296,-1.3789905006<br/> C,0,-4.3832501496,-0.8346061896,-2.6045494849</p>                                                                                                                                                                                                                                                                                                                                                                                                                                      |

H,0,-4.6042713527,-0.3246911899,-3.564224469  
H,0,-5.1843872962,-0.5921345559,-1.9274241752  
H,0,-4.3842618296,-1.8945051086,-2.8127955944  
C,0,-2.462312045,-3.6189578252,-1.45501039  
H,0,-1.3982105892,-3.4358076726,-1.6200006026  
H,0,-2.9932948042,-3.3920874687,-2.3786694711  
H,0,-2.5814930565,-4.6892913436,-1.2690811097  
C,0,-2.2866682161,-3.3654371088,0.9954319016  
H,0,-1.2026930872,-3.3161547044,0.888318234  
H,0,-2.560850381,-4.4121852216,1.1504252892  
H,0,-2.5416590559,-2.8068493345,1.8951958672  
C,0,-4.4945285897,-3.0829664074,-0.0968867529  
H,0,-5.0820611162,-2.703967149,-0.9303061435  
H,0,-4.8836333348,-2.6414239733,0.8206649128  
H,0,-4.6775697139,-4.1589876939,-0.032214891  
C,0,-0.2587638479,2.8070614925,0.2043476888  
N,0,0.2451948798,1.6028050214,-0.21771898  
C,0,0.6049347294,3.8148387788,-0.2153956188  
H,0,0.5057403634,4.8764891775,-0.0611706925  
C,0,1.6172152815,3.1348257978,-0.8892872914  
N,0,1.3820893806,1.8033599553,-0.8795472908  
C,0,2.852587189,3.6670935755,-1.5706113824  
C,0,2.8874287406,5.1898284695,-1.4864747821  
H,0,2.0176253284,5.6369759529,-1.9714322061  
H,0,3.778819372,5.5779536075,-1.9816279449  
H,0,2.9091482094,5.5329615942,-0.4505535547  
C,0,4.0941380617,3.0910539394,-0.8821170084  
H,0,4.1044786308,2.0022300361,-0.9490283099  
H,0,4.1218543296,3.3624193451,0.1744685469  
H,0,5.0059580766,3.4667193396,-1.3512324522  
C,0,2.8488685463,3.2342362915,-3.0392834222  
H,0,2.8121204987,2.1477260185,-3.1208179321  
H,0,3.7492942871,3.5869529163,-3.5469293199  
H,0,1.9836431776,3.6381111869,-3.5675706495  
C,0,0.9906306643,-1.451061103,0.7917463741  
H,0,0.7633568905,-2.4949882718,1.0597247325  
C,0,1.2471627009,-1.4585273618,-0.7238941235  
H,0,1.455477559,-0.4528332678,-1.0914579967  
H,0,0.3302735536,-1.7887915369,-1.2225711999  
C,0,2.3780153979,-2.3782777081,-1.0982067854  
C,0,4.4936584004,-4.0936319746,-1.7399467319  
C,0,2.238716217,-3.7606857161,-0.980493068  
C,0,3.5954459215,-1.8715344397,-1.544444609  
C,0,4.6458947733,-2.7207733213,-1.8626339893  
C,0,3.2835434543,-4.6130421049,-1.2993235717  
H,0,1.2925734815,-4.1714894851,-0.6375638467  
H,0,3.7122825582,-0.7969543949,-1.6431633782  
H,0,5.5867670614,-2.3082833003,-2.2062346756  
H,0,3.1552442159,-5.6848906772,-1.2068297018  
H,0,5.3125623563,-4.7573616348,-1.9881152869  
C,0,2.1267643996,-1.0244495084,1.6572019069  
C,0,4.1921467477,-0.216676097,3.3980182936  
C,0,2.9863067279,0.0264819591,1.3148623636  
C,0,2.3308144571,-1.6636857112,2.8854641655  
C,0,3.3409430115,-1.2691693781,3.7415472779  
C,0,3.9957814549,0.4190084243,2.168953757  
H,0,2.8369844067,0.5451036286,0.3751944137  
H,0,1.6774031614,-2.484374888,3.1650395711  
H,0,3.470754299,-1.7892279407,4.683255713  
H,0,4.6626915736,1.2312685251,1.9056685759  
C,0,5.2921638199,0.2480595516,4.2776311896  
O,0,-1.0995469439,-0.8973418012,2.3539759695  
H,0,-0.0791686509,-1.2229057466,1.594750638  
C,0,-0.7223597467,-0.0775819727,3.4357865437  
H,0,-1.4824126058,0.6902678257,3.6278283389  
H,0,0.232912435,0.4392922006,3.2615252891  
H,0,-0.6062254972,-0.6783223393,4.3446435936  
O,0,6.0117928751,1.1743327545,3.950915869

H,0,-4.6245182341,-0.3417131856,-3.5503282674  
H,0,-5.1931567769,-0.6062832578,-1.9088859371  
H,0,-4.3901490865,-1.9071731346,-2.793467806  
C,0,-2.4567094095,-3.6175652606,-1.4505582993  
H,0,-1.3939511221,-3.4314785764,-1.6214754822  
H,0,-2.9933618353,-3.3932276089,-2.3715294746  
H,0,-2.5710010059,-4.6881772203,-1.2634323309  
C,0,-2.2648254936,-3.361117318,0.9977787845  
H,0,-1.1820378768,-3.3050737585,0.8829129085  
H,0,-2.5313539514,-4.4095547026,1.154334523  
H,0,-2.516577068,-2.8043454721,1.8994909132  
C,0,-4.4817782725,-3.0892965057,-0.0784439172  
H,0,-5.0769907265,-2.7183037037,-0.9100200009  
H,0,-4.8669937541,-2.6445343477,0.8392058588  
H,0,-4.658660055,-4.1658650472,-0.006505966  
C,0,-0.2632358985,2.8137522632,0.1921996821  
N,0,0.2432345357,1.6114294795,-0.2309785361  
C,0,0.5928021274,3.8256600467,-0.2339774508  
H,0,0.4881943722,4.8870125938,-0.0810421884  
C,0,1.6035771232,3.1496822318,-0.9137278268  
N,0,1.3750503596,1.8172495416,-0.9010747476  
C,0,2.8339064908,3.6867439451,-1.6005646109  
C,0,2.8559924338,5.2104679695,-1.5312329703  
H,0,1.9824761635,5.6452333073,-2.0204922188  
H,0,3.7441795724,5.6017804089,-2.0298579934  
H,0,2.8737878473,5.5638398348,-0.4986191223  
C,0,4.0802610233,3.1286706922,-0.9056292262  
H,0,4.0978871853,2.0391124338,-0.958153366  
H,0,4.1039965454,3.4132710283,0.1478502727  
H,0,4.9894637349,3.505763665,-1.3791806188  
C,0,2.8358121703,3.2396692517,-3.0648123774  
H,0,2.8075427049,2.1521561423,-3.1356619222  
H,0,3.7335681332,3.5950771601,-3.5754777172  
H,0,1.9676070242,3.6310038876,-3.597405227  
C,0,0.9972014955,-1.4312766774,0.7796571015  
H,0,0.776306219,-2.477274315,1.0458944115  
C,0,1.2490191803,-1.4389574195,-0.7372958681  
H,0,1.4469644015,-0.4323218247,-1.1078467071  
H,0,0.3354881973,-1.7833010926,-1.2327546516  
C,0,2.3875324032,-2.3468022117,-1.1082541221  
C,0,4.5322874924,-4.0497896439,-1.7357255053  
C,0,2.2604087518,-3.7336909456,-0.9941810591  
C,0,3.6044992514,-1.8283206129,-1.5430290305  
C,0,4.663320784,-2.6658772946,-1.8516316011  
C,0,3.3101201535,-4.5722519942,-1.304474967  
H,0,1.3150571684,-4.1519726867,-0.6590873003  
H,0,3.7123054048,-0.7529095692,-1.6384913568  
H,0,5.5997476283,-2.2348289265,-2.1848906123  
H,0,3.218207201,-5.6486451999,-1.2246933216  
C,0,5.6349406407,-4.9925340612,-2.0569859539  
C,0,2.1420429218,-1.0044667852,1.6416006225  
C,0,4.2142966023,-0.2067959919,3.3587504435  
C,0,2.9892601924,0.0521083399,1.2997264602  
C,0,2.361960828,-1.6535366437,2.8603989488  
C,0,3.3822675996,-1.2602007422,3.7109547798  
C,0,4.0127914512,0.4430343621,2.1486174631  
H,0,2.8270246365,0.5802195127,0.3675171917  
H,0,1.7153718682,-2.4800680996,3.1398947192  
H,0,3.5327265933,-1.7819737682,4.6484608557  
H,0,4.6589087694,1.2638133827,1.8597774037  
H,0,5.0159565396,0.1004785419,4.0187992169  
O,0,-1.0860644633,-0.8917318455,2.3528372264  
H,0,-0.0707209781,-1.211955007,1.5877532024  
C,0,-0.7045862338,-0.0739575915,3.4351755928  
H,0,-1.4629774424,0.6950581381,3.6295474858  
H,0,0.2518588195,0.4396804619,3.260139783  
H,0,-0.5882703516,-0.6767144464,4.3424899132  
O,0,5.4788685952,-6.1956836176,-1.9616151799

|                                                                                                                                                                                                                                                                                                                                                                                                                                                                                                                                                                                                                                                                                                                                                                                                                                                                                                                                                                                                                                                                                                                                                                                                                                                                                                                                                                                                       |                                                                                                                                                                                                                                                                                                                                                                                                                                                                                                                                                                                                                                                                                                                                                                                                                                                                                                                                                                                                                                                                                                                                                                                                                                                                                                                                                                                                                                                     |
|-------------------------------------------------------------------------------------------------------------------------------------------------------------------------------------------------------------------------------------------------------------------------------------------------------------------------------------------------------------------------------------------------------------------------------------------------------------------------------------------------------------------------------------------------------------------------------------------------------------------------------------------------------------------------------------------------------------------------------------------------------------------------------------------------------------------------------------------------------------------------------------------------------------------------------------------------------------------------------------------------------------------------------------------------------------------------------------------------------------------------------------------------------------------------------------------------------------------------------------------------------------------------------------------------------------------------------------------------------------------------------------------------------|-----------------------------------------------------------------------------------------------------------------------------------------------------------------------------------------------------------------------------------------------------------------------------------------------------------------------------------------------------------------------------------------------------------------------------------------------------------------------------------------------------------------------------------------------------------------------------------------------------------------------------------------------------------------------------------------------------------------------------------------------------------------------------------------------------------------------------------------------------------------------------------------------------------------------------------------------------------------------------------------------------------------------------------------------------------------------------------------------------------------------------------------------------------------------------------------------------------------------------------------------------------------------------------------------------------------------------------------------------------------------------------------------------------------------------------------------------|
| <p>C,0,5.4991070994,-0.4570707161,5.59554977<br/> H,0,6.3360965204,-0.0051046592,6.1194292505<br/> H,0,4.6078086678,-0.3917260423,6.2215684164<br/> H,0,5.7013841978,-1.5187981338,5.4461471583</p>                                                                                                                                                                                                                                                                                                                                                                                                                                                                                                                                                                                                                                                                                                                                                                                                                                                                                                                                                                                                                                                                                                                                                                                                   | <p>C,0,6.9558674964,-4.4197993052,-2.5045644444<br/> H,0,7.6553376015,-5.2284762159,-2.6940432639<br/> H,0,6.8390461399,-3.8269985228,-3.4130977718<br/> H,0,7.3724842214,-3.7545146992,-1.7468377289</p>                                                                                                                                                                                                                                                                                                                                                                                                                                                                                                                                                                                                                                                                                                                                                                                                                                                                                                                                                                                                                                                                                                                                                                                                                                           |
| <p>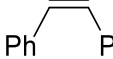 Ph-<i>p</i>-CN</p>                                                                                                                                                                                                                                                                                                                                                                                                                                                                                                                                                                                                                                                                                                                                                                                                                                                                                                                                                                                                                                                                                                                                                                                                                                                                                               | <p> Ph-<i>p</i>-NO<sub>2</sub></p>                                                                                                                                                                                                                                                                                                                                                                                                                                                                                                                                                                                                                                                                                                                                                                                                                                                                                                                                                                                                                                                                                                                                                                                                                                                                                                                                 |
| <p>C,0,-0.4932525667,-0.4697327902,1.0253543871<br/> H,0,-0.7205700787,0.4655084675,1.5303179928<br/> C,0,-0.2565642736,-0.3816740071,-0.2930515107<br/> H,0,-0.2258552521,0.6216139279,-0.7089533941<br/> C,0,-0.4643257684,-1.6349497647,1.9073003448<br/> C,0,-0.4177986142,-3.8006485918,3.6837527661<br/> C,0,0.4531083389,-2.6789236052,1.7427994857<br/> C,0,-1.3334269251,-1.687451366,3.0019304623<br/> C,0,-1.3199749258,-2.7642026248,3.8730052837<br/> C,0,0.4745770543,-3.7479603618,2.6202916188<br/> H,0,1.164228472,-2.6363414825,0.9270198808<br/> H,0,-2.0326632815,-0.8739016036,3.1589801819<br/> H,0,-2.0101110703,-2.790400586,4.7070569642<br/> H,0,1.1983276641,-4.5413441677,2.4806436195<br/> H,0,-0.3990270799,-4.6388429769,4.3687504173<br/> C,0,-0.0565327775,-1.4397211784,-1.2788191682<br/> C,0,0.3075504665,-3.3886827818,-3.2676924906<br/> C,0,0.7460631595,-1.1900110218,-2.3985705678<br/> C,0,-0.7009651291,-2.6812280898,-1.1977036564<br/> C,0,-0.5247160768,-3.6409902267,-2.1707700679<br/> C,0,0.9393875754,-2.1470736808,-3.3739563814<br/> H,0,1.2320267813,-0.2261479964,-2.4935928449<br/> H,0,-1.3593222362,-2.8843972359,-0.3633058832<br/> H,0,-1.0350681999,-4.5923346559,-2.0982930509<br/> H,0,1.5732078639,-1.9416929533,-4.2264148577<br/> C,0,0.4955558655,-4.3784915982,-4.2695312793<br/> N,0,0.6504536566,-5.1860788053,-5.0859819581</p> | <p>C,0,-0.4878345548,-0.4736387286,1.0234189246<br/> H,0,-0.7092702061,0.4652705004,1.5242082602<br/> C,0,-0.2507259591,-0.3919713647,-0.2956780226<br/> H,0,-0.2121909472,0.6096305708,-0.7147997384<br/> C,0,-0.4640312195,-1.6346131498,1.9097492328<br/> C,0,-0.4303114767,-3.7956726986,3.6911085749<br/> C,0,0.4424187511,-2.6880105802,1.7431661798<br/> C,0,-1.327102414,-1.6746715277,3.0097660859<br/> C,0,-1.3203505362,-2.7493933632,3.88317667<br/> C,0,0.4572032921,-3.7549422515,2.6229517072<br/> H,0,1.1503719776,-2.6542617574,0.9242515689<br/> H,0,-2.0170041589,-0.8535109647,3.1683704738<br/> H,0,-2.006005582,-2.7661631508,4.7210848877<br/> H,0,1.1716729945,-4.5563475485,2.4818343721<br/> H,0,-0.416758057,-4.6325411295,4.3778091106<br/> C,0,-0.0564306149,-1.4538162303,-1.277686389<br/> C,0,0.2949817836,-3.3841700333,-3.2392886806<br/> C,0,0.7507619221,-1.2071752757,-2.3964811369<br/> C,0,-0.7106960855,-2.6916605916,-1.1930056077<br/> C,0,-0.5394185897,-3.6548589489,-2.1646143342<br/> C,0,0.9408823003,-2.1665770245,-3.3712501346<br/> H,0,1.2420938602,-0.2460958165,-2.489842112<br/> H,0,-1.3712972597,-2.8867800197,-0.3586041461<br/> H,0,-1.0437422983,-4.6096139397,-2.1153608597<br/> H,0,1.5718331834,-1.9918455075,-4.2312219989<br/> N,0,0.4851923278,-4.4127502458,-4.2759387949<br/> O,0,1.2142015567,-4.1375953607,-5.2205381053<br/> O,0,-0.096554003,-5.4800541726,-4.1283661675</p> |
| <p> Ph-<i>p</i>-COCH<sub>3</sub></p>                                                                                                                                                                                                                                                                                                                                                                                                                                                                                                                                                                                                                                                                                                                                                                                                                                                                                                                                                                                                                                                                                                                                                                                                                                                                               |                                                                                                                                                                                                                                                                                                                                                                                                                                                                                                                                                                                                                                                                                                                                                                                                                                                                                                                                                                                                                                                                                                                                                                                                                                                                                                                                                                                                                                                     |
| <p>C,0,-0.4634003899,-0.4579552201,1.0218243132<br/> H,0,-0.6541845569,0.4884260184,1.5212100489<br/> C,0,-0.2281519966,-0.3896422689,-0.2981718825<br/> H,0,-0.1611212093,0.6091056591,-0.7212749953<br/> C,0,-0.4718056155,-1.617029301,1.9123178609<br/> C,0,-0.4891278733,-3.7703974649,3.7056954958<br/> C,0,0.4006946311,-2.6984982327,1.7447734094<br/> C,0,-1.3275809527,-1.6270656768,3.0187248855<br/> C,0,-1.3459418396,-2.6968075773,3.8984248058<br/> C,0,0.3902690239,-3.7610307829,2.6300217228<br/> H,0,1.1018234454,-2.6907404296,0.9195276866<br/> H,0,-1.9912745193,-0.7846465235,3.1782933779<br/> H,0,-2.0253616014,-2.6883249009,4.7417006601<br/> H,0,1.0798643174,-4.5839354528,2.4875658206<br/> H,0,-0.4951038597,-4.6035811459,4.3970987601<br/> C,0,-0.0683143952,-1.4612123816,-1.2766815279<br/> C,0,0.2283371538,-3.4423194572,-3.2556771964<br/> C,0,0.7542346141,-1.2539000555,-2.3927586697<br/> C,0,-0.766250498,-2.6721805288,-1.1922604552<br/> C,0,-0.6202309033,-3.6422687483,-2.1634685089<br/> C,0,0.9104138163,-2.2287751092,-3.3551654924<br/> H,0,1.281625994,-0.3113138717,-2.4874442426<br/> H,0,-1.4380128022,-2.8396471806,-0.3600041833<br/> H,0,-1.180851961,-4.5648195639,-2.0737382378<br/> H,0,1.5566495855,-2.0771307367,-4.2110077125<br/> C,0,0.4238739861,-4.4597069944,-4.3225508032<br/> O,0,1.170213053,-4.2450936104,-5.2587307529</p>   |                                                                                                                                                                                                                                                                                                                                                                                                                                                                                                                                                                                                                                                                                                                                                                                                                                                                                                                                                                                                                                                                                                                                                                                                                                                                                                                                                                                                                                                     |



|                                                                                                                                                                                                                                                                                                                                                                                                                                                                                                                                                                                                                                                                                                                                                                                                                                                                                                                                                                                                                                                                                                                                                                                                                                                                                                                                                                                                                                                                                                                                                                                                                                                                                                                                                                                                                                                                                                                                                                                                                                                                                                                                                                                                                                                                                                                                                                                                                                                                                                                                                                                                                                                                                                                                                                                                                                                 |                                                                                                                                                                                                                                                                                                                                                                                                                                                                                                                                                                                                                                                                                                                                                                                                                                                                                                                                                                                                                                                                                                                                                                                                                                                                                                                                                                                                                                                                                                                                                                                                                                                                                                                                                                                                                                                                                                                                                                                                                                                                                                                                                                                                                                                                                                                                                                                                                                                                                                                                                                                                                                                                                                                                                                                                                                                |
|-------------------------------------------------------------------------------------------------------------------------------------------------------------------------------------------------------------------------------------------------------------------------------------------------------------------------------------------------------------------------------------------------------------------------------------------------------------------------------------------------------------------------------------------------------------------------------------------------------------------------------------------------------------------------------------------------------------------------------------------------------------------------------------------------------------------------------------------------------------------------------------------------------------------------------------------------------------------------------------------------------------------------------------------------------------------------------------------------------------------------------------------------------------------------------------------------------------------------------------------------------------------------------------------------------------------------------------------------------------------------------------------------------------------------------------------------------------------------------------------------------------------------------------------------------------------------------------------------------------------------------------------------------------------------------------------------------------------------------------------------------------------------------------------------------------------------------------------------------------------------------------------------------------------------------------------------------------------------------------------------------------------------------------------------------------------------------------------------------------------------------------------------------------------------------------------------------------------------------------------------------------------------------------------------------------------------------------------------------------------------------------------------------------------------------------------------------------------------------------------------------------------------------------------------------------------------------------------------------------------------------------------------------------------------------------------------------------------------------------------------------------------------------------------------------------------------------------------------|------------------------------------------------------------------------------------------------------------------------------------------------------------------------------------------------------------------------------------------------------------------------------------------------------------------------------------------------------------------------------------------------------------------------------------------------------------------------------------------------------------------------------------------------------------------------------------------------------------------------------------------------------------------------------------------------------------------------------------------------------------------------------------------------------------------------------------------------------------------------------------------------------------------------------------------------------------------------------------------------------------------------------------------------------------------------------------------------------------------------------------------------------------------------------------------------------------------------------------------------------------------------------------------------------------------------------------------------------------------------------------------------------------------------------------------------------------------------------------------------------------------------------------------------------------------------------------------------------------------------------------------------------------------------------------------------------------------------------------------------------------------------------------------------------------------------------------------------------------------------------------------------------------------------------------------------------------------------------------------------------------------------------------------------------------------------------------------------------------------------------------------------------------------------------------------------------------------------------------------------------------------------------------------------------------------------------------------------------------------------------------------------------------------------------------------------------------------------------------------------------------------------------------------------------------------------------------------------------------------------------------------------------------------------------------------------------------------------------------------------------------------------------------------------------------------------------------------------|
| <p>C,0,-0.3257639055,-5.7622169604,-4.2120345467<br/> H,0,-0.077859711,-6.3957997183,-5.0581817845<br/> H,0,-1.4037642049,-5.5942761859,-4.1941487568<br/> H,0,-0.0738491784,-6.2839097213,-3.2874472529</p>                                                                                                                                                                                                                                                                                                                                                                                                                                                                                                                                                                                                                                                                                                                                                                                                                                                                                                                                                                                                                                                                                                                                                                                                                                                                                                                                                                                                                                                                                                                                                                                                                                                                                                                                                                                                                                                                                                                                                                                                                                                                                                                                                                                                                                                                                                                                                                                                                                                                                                                                                                                                                                    |                                                                                                                                                                                                                                                                                                                                                                                                                                                                                                                                                                                                                                                                                                                                                                                                                                                                                                                                                                                                                                                                                                                                                                                                                                                                                                                                                                                                                                                                                                                                                                                                                                                                                                                                                                                                                                                                                                                                                                                                                                                                                                                                                                                                                                                                                                                                                                                                                                                                                                                                                                                                                                                                                                                                                                                                                                                |
| 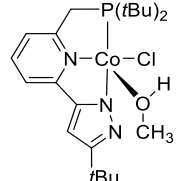 <p><b>PNNCo-Cl+CH<sub>3</sub>OH</b></p>                                                                                                                                                                                                                                                                                                                                                                                                                                                                                                                                                                                                                                                                                                                                                                                                                                                                                                                                                                                                                                                                                                                                                                                                                                                                                                                                                                                                                                                                                                                                                                                                                                                                                                                                                                                                                                                                                                                                                                                                                                                                                                                                                                                                                                                                                                                                                                                                                                                                                                                                                                                                                                                                                                                       |  <p><b>PNNCo-H+CH<sub>3</sub>OH</b></p>                                                                                                                                                                                                                                                                                                                                                                                                                                                                                                                                                                                                                                                                                                                                                                                                                                                                                                                                                                                                                                                                                                                                                                                                                                                                                                                                                                                                                                                                                                                                                                                                                                                                                                                                                                                                                                                                                                                                                                                                                                                                                                                                                                                                                                                                                                                                                                                                                                                                                                                                                                                                                                                                                                                      |
| <p>Co,0,0.4042552499,1.1885045909,-0.0915929659<br/> P,0,0.1314772802,1.4156308004,-2.2952716305<br/> N,0,-0.0509133595,3.0930467751,-0.0173615015<br/> C,0,-0.324083673,5.830529181,0.2264417754<br/> C,0,0.1804037475,3.6959832806,1.1897436824<br/> C,0,-0.4173096472,3.8306936335,-1.0842752262<br/> C,0,-0.5512683352,5.2065625973,-0.9959099926<br/> C,0,0.0329417092,5.0772792336,1.3241311919<br/> H,0,-0.8420237893,5.7729182759,-1.8701056681<br/> H,0,0.2219683638,5.535816412,2.284940049<br/> H,0,-0.4266531762,6.9048731655,0.3139919587<br/> C,0,-0.7264290398,3.06674401,-2.3314519549<br/> H,0,-0.5268927286,3.6551071252,-3.2272787769<br/> H,0,-1.7971519135,2.8512758002,-2.3379466271<br/> C,0,-0.9644111618,0.2996180744,-3.3618531811<br/> C,0,1.8278462605,1.7473785594,-3.0840303596<br/> C,0,2.4612694512,0.4265324557,-3.5123793109<br/> H,0,3.5080090247,0.6011737802,-3.7728017134<br/> H,0,1.9764992157,0.0041383416,-4.3929401002<br/> H,0,2.4342952569,-0.3102358378,-2.70732503<br/> C,0,2.6822271811,2.3549935924,-1.96594753<br/> H,0,3.6799524125,2.5761572171,-2.3533372363<br/> H,0,2.8001876439,1.6623279603,-1.1288169258<br/> H,0,2.2658037292,3.2900970442,-1.5857100006<br/> C,0,1.7870959536,2.7223904832,-4.2564694768<br/> H,0,2.7927564685,2.8196085066,-4.6728057881<br/> H,0,1.4769484949,3.7222010179,-3.9493618871<br/> H,0,1.1332075908,2.395282198,-5.0633672055<br/> C,0,-0.5164630875,-1.1528691959,-3.2005827603<br/> H,0,0.4914016629,-1.3315485684,-3.5674067958<br/> H,0,-1.195004461,-1.7927717208,-3.770156645<br/> H,0,-0.5396469098,-1.4653870825,-2.1576183568<br/> C,0,-2.3885551346,0.4086345822,-2.8069761293<br/> H,0,-2.4121029395,0.289149341,-1.7223769913<br/> H,0,-2.9941121314,-0.3887132737,-3.2431380414<br/> H,0,-2.8729351411,1.3492415892,-3.0708621865<br/> C,0,-0.9579516179,0.6978204968,-4.8336874293<br/> H,0,0.0091171024,0.5235155485,-5.305451084<br/> H,0,-1.2288389372,1.7450196517,-4.9838597648<br/> H,0,-1.6917420499,0.093785268,-5.3736481701<br/> C,0,0.5676393815,2.7792686702,2.20938047<br/> N,0,0.7529103922,1.4946941193,1.7936910459<br/> C,0,0.7502028262,2.8190534963,3.5923555271<br/> H,0,0.6803065924,3.6728394164,4.2461828434<br/> C,0,1.0299643498,1.4972267873,3.9283573357<br/> N,0,1.0279260859,0.7098095261,2.8240996985<br/> C,0,1.2953014877,0.8763168453,5.2757873299<br/> C,0,1.2677729351,1.9418246016,6.3667054617<br/> H,0,2.0287051322,2.7061757586,6.1978613342<br/> H,0,1.4604011547,1.4931932475,7.3427030283<br/> H,0,0.2970781802,2.4392367108,6.417221547<br/> C,0,0.2157593918,-0.1734824562,5.5584241826<br/> H,0,0.2130797839,-0.9376449086,4.7810996738<br/> H,0,-0.7765057506,0.2818019105,5.5868696264<br/> H,0,0.3902236707,-0.6609874209,6.520318897<br/> C,0,2.6656973538,0.1938105286,5.2583884567</p> | <p>Co,0,0.6346502249,1.2682570295,-0.183841592<br/> P,0,0.2298158765,1.4993974469,-2.3013626031<br/> N,0,0.0419644025,3.1579141579,-0.0194972464<br/> C,0,-0.3646543007,5.8597661788,0.3214652588<br/> C,0,0.2735107508,3.7273709257,1.2002734224<br/> C,0,-0.3754320599,3.9043624249,-1.0570453005<br/> C,0,-0.5851154618,5.2683207197,-0.9178682708<br/> C,0,0.0632963981,5.092308373,1.3872902444<br/> H,0,-0.9238978431,5.852080396,-1.7633165871<br/> H,0,0.253341529,5.5327706268,2.3567060012<br/> H,0,-0.5237050022,6.9233826333,0.4484385048<br/> C,0,-0.6346823131,3.1628357191,-2.3368681596<br/> H,0,-0.3713230847,3.7701413114,-3.2039330554<br/> H,0,-1.7069807489,2.9725896102,-2.4195809568<br/> C,0,-0.937519774,0.2926002642,-3.1726883198<br/> C,0,1.8249558537,1.8162090998,-3.2792577004<br/> C,0,2.5223722472,0.4844527984,-3.5405223566<br/> H,0,3.5415477092,0.6680858482,-3.88936706<br/> H,0,2.0165631636,-0.0956081995,-4.3135328614<br/> H,0,2.5801669767,-0.1207059525,-2.6340770555<br/> C,0,2.6870364132,2.6486406455,-2.3243785786<br/> H,0,3.6494699569,2.8682500352,-2.7934743589<br/> H,0,2.882772567,2.119178256,-1.3924914058<br/> H,0,2.2204740763,3.603957771,-2.0725943879<br/> C,0,1.6579735572,2.5812175307,-4.5878947087<br/> H,0,2.6400704593,2.7191415976,-5.0476661074<br/> H,0,1.2420601767,3.5781071446,-4.4389936961<br/> H,0,1.0348319531,2.0587954095,-5.3107669303<br/> C,0,-0.4314944486,-1.1235518551,-2.8915084828<br/> H,0,0.5381249171,-1.3223728066,-3.3440995145<br/> H,0,-1.1412983389,-1.8456988107,-3.3024294017<br/> H,0,-0.3421485228,-1.299604763,-1.8193634125<br/> C,0,-2.3031321676,0.4350230773,-2.4956862525<br/> H,0,-2.2142425503,0.3909710103,-1.4088495426<br/> H,0,-2.9416691408,-0.3943334377,-2.8079022179<br/> H,0,-2.8198424955,1.3540789124,-2.77381951<br/> C,0,-1.0739635611,0.5257368913,-4.6714216079<br/> H,0,-0.151607017,0.2977685941,-5.8671974116<br/> H,0,-1.3609787082,1.5525879807,-4.9081454606<br/> H,0,-1.8493461471,-0.129967979,-5.0763781433<br/> C,0,0.7055738017,2.7767467204,2.183122244<br/> N,0,0.986721644,1.5305559171,1.7100536511<br/> C,0,0.7507615153,2.7365213804,3.5779267206<br/> H,0,0.5759178909,3.5444870864,4.26934392<br/> C,0,1.0349562172,1.4037274767,3.8671718346<br/> N,0,1.1745959208,0.686355321,2.7260335175<br/> C,0,1.1600822779,0.7112244842,5.2002381781<br/> C,0,1.0049933427,1.7143209267,6.3386757911<br/> H,0,1.7709613715,2.4907133556,6.293318665<br/> H,0,1.0970027246,1.2135301402,7.3040160219<br/> H,0,0.0292565166,2.203459624,6.311614741<br/> C,0,0.0626811942,-0.3532336845,5.3066612769<br/> H,0,0.1499013017,-1.0761050729,4.4949875171<br/> H,0,-0.9292656452,0.0998814041,5.2477066429<br/> H,0,0.1317787714,-0.8918877898,6.2546387009<br/> C,0,2.5288119116,0.0327526547,5.2980785643</p> |

|                                                                                                                                                                                                                                                                                                                                                                                                                                                                                    |                                                                                                                                                                                                                                                                                                                                                                                                                                                                                                                                                                                    |
|------------------------------------------------------------------------------------------------------------------------------------------------------------------------------------------------------------------------------------------------------------------------------------------------------------------------------------------------------------------------------------------------------------------------------------------------------------------------------------|------------------------------------------------------------------------------------------------------------------------------------------------------------------------------------------------------------------------------------------------------------------------------------------------------------------------------------------------------------------------------------------------------------------------------------------------------------------------------------------------------------------------------------------------------------------------------------|
| H,0,3.4622516772,0.9173966358,5.0777122824<br>H,0,2.7110201121,-0.5555059742,4.4689058903<br>H,0,2.8648159299,-0.2957429526,6.2145373035<br>O,0,-1.5139798063,0.065378529,0.4702247402<br>Cl,0,1.3049788983,-0.892817126,-0.1824948806<br>C,0,-2.1801013412,0.368650854,1.6943380685<br>H,0,-2.9878108945,-0.3429422529,1.8826327624<br>H,0,-1.4896411151,0.3715540084,2.5403526651<br>H,0,-2.6097591106,1.3635254762,1.5882639948<br>H,0,-0.9472092824,-0.7144681409,0.6034662018 | H,0,3.334957284,0.7659869301,5.2424270305<br>H,0,2.6659283259,-0.6747379379,4.4810399089<br>H,0,2.6266383766,-0.5054700258,6.2438297436<br>O,0,-1.1546561824,-0.0509795314,0.7721681844<br>H,0,1.3176350897,-0.0822801873,-0.3398411919<br>C,0,-2.0315867953,0.6019727547,1.680362497<br>H,0,-2.596972042,-0.1192427764,2.2779707692<br>H,0,-1.4964527662,1.2775089482,2.3537891117<br>H,0,-2.7348415797,1.1867131464,1.0874363248<br>H,0,-0.4104483905,-0.3973401506,1.2916075601                                                                                                 |
| H <sub>3</sub> C-OH                                                                                                                                                                                                                                                                                                                                                                                                                                                                | H <sub>3</sub> B-NH <sub>3</sub>                                                                                                                                                                                                                                                                                                                                                                                                                                                                                                                                                   |
| C,0,0.0094913835,-0.0164396713,1.0865460649<br>H,0,1.022670451,0.0055193913,1.5044060773<br>H,0,-0.5161140454,-0.8828996048,1.5044062447<br>H,0,-0.5083416623,0.8804721709,1.4205771352<br>O,0,-0.0003034841,0.0005252454,-0.3248917613<br>H,0,0.455275848,-0.7885601605,-0.6289923402                                                                                                                                                                                             | N,0,-2.854130811,-0.5383776749,-0.0268748835<br>B,0,-2.3017748553,0.2427066843,1.3260402068<br>H,0,-1.1021249851,0.1929728922,1.2401743699<br>H,0,-2.748327834,1.3572532627,1.2400353713<br>H,0,-2.7485191264,-0.3888913895,2.2482615395<br>H,0,-2.5345630274,-1.5002986866,-0.0606891243<br>H,0,-2.5347388569,-0.0865447116,-0.8768018709<br>H,0,-3.8675505039,-0.5580013765,-0.0605256088                                                                                                                                                                                        |
| H <sub>2</sub> B=NH <sub>2</sub>                                                                                                                                                                                                                                                                                                                                                                                                                                                   | H <sub>3</sub> CO<br>H <sub>2</sub> B-NH <sub>3</sub>                                                                                                                                                                                                                                                                                                                                                                                                                                                                                                                              |
| B,0,0.,0.,0.7628614846<br>H,0,-1.039923048,0.,1.3384876598<br>H,0,1.039923048,0.,1.3384876598<br>N,0,0.,0.,-0.624364452<br>H,0,-0.8378898784,0.,-1.1806531261<br>H,0,0.8378898784,0.,-1.1806531261                                                                                                                                                                                                                                                                                 | C,0,0.4591553169,0.1952434089,1.2777631527<br>N,0,-2.9522396465,-0.5122721692,0.0269893346<br>O,0,-0.6581040643,-0.2302179202,0.5586641285<br>B,0,-1.9271423604,0.157000462,1.1311774084<br>H,0,-2.7903699915,-1.5129559257,-0.0247858917<br>H,0,-2.7594996071,-0.1284566488,-0.8926771912<br>H,0,-3.9285271149,-0.3536860189,0.2452431903<br>H,0,-2.1698586384,1.348297099,1.1163138694<br>H,0,-2.2081368432,-0.3671899553,2.1916444265<br>H,0,0.473146905,-0.2091001846,2.3002375776<br>H,0,1.363525558,-0.1444107496,0.7686155449<br>H,0,0.5071404865,1.2907216024,1.3600514499 |
| Cl<br>H <sub>2</sub> B-NH <sub>3</sub>                                                                                                                                                                                                                                                                                                                                                                                                                                             | H <sub>2</sub><br>Cl-B-H-BH <sub>2</sub><br>NH <sub>3</sub>                                                                                                                                                                                                                                                                                                                                                                                                                                                                                                                        |
| N,0,-2.8468285634,-0.5280955654,-0.0332551554<br>B,0,-2.2868759489,0.2637785449,1.2898404245<br>H,0,-1.0951702595,0.1936887579,1.2357758769<br>H,0,-2.7501605754,1.363979391,1.2357710135<br>Cl,0,-2.9877293743,-0.7273416052,2.7008327654<br>H,0,-2.5290591657,-1.4929117006,-0.0311659448<br>H,0,-2.5405853919,-0.0950191446,-0.8993024459<br>H,0,-3.8623897074,-0.5500761875,-0.0311700342                                                                                      | N,0,0.4763939836,0.1258557994,0.4913445791<br>B,0,1.649502746,-0.1923731376,-0.550557404<br>H,0,2.4181422887,0.7912897485,-0.6909597743<br>H,0,2.3076538834,-1.0912752417,-0.1362063435<br>Cl,0,0.8607546347,-0.4859079392,-2.1679442101<br>H,0,-0.0522582673,0.9367557516,0.1741666278<br>H,0,0.8665763665,0.3676987193,1.3995628776<br>H,0,-0.1567817728,-0.6623030105,0.5880949478<br>B,0,2.3773960417,1.9946182196,-0.0186966288<br>H,0,3.3452436246,2.4183394092,-0.5688271015<br>H,0,1.3231393814,2.4720135836,-0.3358690005<br>H,0,2.5053190895,1.6965797978,1.1372801302   |
| Cl-BH <sub>2</sub>                                                                                                                                                                                                                                                                                                                                                                                                                                                                 | H<br>H <sub>2</sub> B-BH <sub>2</sub><br>H                                                                                                                                                                                                                                                                                                                                                                                                                                                                                                                                         |
| B,0,-2.2085173446,0.3745907299,1.526783746<br>H,0,-1.1099973313,0.1280142551,1.1680480657<br>H,0,-2.8071230941,1.3281132774,1.1680312389<br>Cl,0,-2.9791882657,-0.7152412372,2.6367219494                                                                                                                                                                                                                                                                                          | H,0,1.0325072922,0.,1.4466052489<br>H,0,-1.0325072922,0.,1.4466052489<br>H,0,-1.0325072922,0.,-1.4466052489<br>H,0,1.0325072922,0.,-1.4466052489<br>B,0,0.,0.,0.8687903321<br>B,0,0.,0.,-0.8687903321<br>H,0,0.,0.9758449641,0.<br>H,0,0.,-0.9758449641,0.                                                                                                                                                                                                                                                                                                                         |
| H<br>H<br>Cl-B-B-Cl<br>H<br>H                                                                                                                                                                                                                                                                                                                                                                                                                                                      | H <sub>2</sub> B-OCH <sub>3</sub>                                                                                                                                                                                                                                                                                                                                                                                                                                                                                                                                                  |
| H,0,1.4506169292,0.,-1.0380744113                                                                                                                                                                                                                                                                                                                                                                                                                                                  | C,0,0.5442981253,0.2885371664,1.3806261088                                                                                                                                                                                                                                                                                                                                                                                                                                                                                                                                         |

|                                                                                                                                                                                                                                                                                                                                                                                                                                                                                                                                                                                                                                                                                                                                                                                                                                                                                                                                                                     |                                                                                                                                                                                                                                                                                                                                                                                                                                                                                                                                                                                                                                                                                                                                                                      |
|---------------------------------------------------------------------------------------------------------------------------------------------------------------------------------------------------------------------------------------------------------------------------------------------------------------------------------------------------------------------------------------------------------------------------------------------------------------------------------------------------------------------------------------------------------------------------------------------------------------------------------------------------------------------------------------------------------------------------------------------------------------------------------------------------------------------------------------------------------------------------------------------------------------------------------------------------------------------|----------------------------------------------------------------------------------------------------------------------------------------------------------------------------------------------------------------------------------------------------------------------------------------------------------------------------------------------------------------------------------------------------------------------------------------------------------------------------------------------------------------------------------------------------------------------------------------------------------------------------------------------------------------------------------------------------------------------------------------------------------------------|
| H,0,-1.4506169292,0.,1.0380744113<br>B,0,0.8810132765,0.,-0.0054462022<br>B,0,-0.8810132765,0.,0.0054462022<br>Cl,0,1.7806202871,0.,1.5181164675<br>Cl,0,-1.7806202871,0.,-1.5181164675<br>H,0,0.,0.9773853293,0.<br>H,0,0.,-0.9773853293,0.                                                                                                                                                                                                                                                                                                                                                                                                                                                                                                                                                                                                                                                                                                                        | O,0,-0.6626939303,0.6658228185,0.7356701188<br>B,0,-1.8576972446,0.2724956907,1.2036528553<br>H,0,-2.8131390763,0.63613868,0.5993568134<br>H,0,-1.9276007344,-0.4100183857,2.1826081425<br>H,0,0.3534157406,-0.3318304457,2.258987685<br>H,0,1.1642364742,-0.262820918,0.6741335313<br>H,0,1.0795186455,1.1887313937,1.6819747448                                                                                                                                                                                                                                                                                                                                                                                                                                    |
| NH3-M06L                                                                                                                                                                                                                                                                                                                                                                                                                                                                                                                                                                                                                                                                                                                                                                                                                                                                                                                                                            | BH3-M06L                                                                                                                                                                                                                                                                                                                                                                                                                                                                                                                                                                                                                                                                                                                                                             |
| H,0,-1.8149030191,0.4672480836,0.8092974206<br>H,0,-1.8149030191,0.4672480836,-0.8092974206<br>H,0,-1.8149030191,-0.9344961672,0.<br>N,0,-1.42608436,0.,0.                                                                                                                                                                                                                                                                                                                                                                                                                                                                                                                                                                                                                                                                                                                                                                                                          | H,0,-1.7190979128,0.5919770055,1.0253342504<br>H,0,-1.7190979128,0.5919770055,-1.0253342504<br>H,0,-1.7190979128,-1.1839540109,0.<br>B,0,-1.7190897693,0.,0.                                                                                                                                                                                                                                                                                                                                                                                                                                                                                                                                                                                                         |
| $\begin{array}{c} \text{H} \\   \\ \text{H}_3\text{CO}-\text{B}-\text{OCH}_3 \\   \\ \text{NH}_3 \end{array}$                                                                                                                                                                                                                                                                                                                                                                                                                                                                                                                                                                                                                                                                                                                                                                                                                                                       | $\begin{array}{c} \text{H} \\   \\ \text{H}_3\text{CO}-\text{B}-\text{OCH}_3 \end{array}$                                                                                                                                                                                                                                                                                                                                                                                                                                                                                                                                                                                                                                                                            |
| B,0,-0.067308528,0.4685191147,0.5268527839<br>N,0,0.0872893569,0.2165653994,-1.1127778732<br>H,0,0.6161305197,-0.6191906619,-1.3294681092<br>H,0,0.5185095395,1.0150361133,-1.5644993426<br>H,0,-0.8501796017,0.1087691018,-1.4886261562<br>O,0,-0.9030574273,-0.6263546001,0.9379651112<br>O,0,-0.6853535197,1.768669063,0.4931835045<br>C,0,-0.6189474048,-1.2664937665,2.148612508<br>H,0,0.4530884158,-1.4671011411,2.2717791931<br>H,0,-1.1508183447,-2.2199015159,2.1813015544<br>H,0,-0.9419025643,-0.6779031921,3.0178515685<br>C,0,-1.0935475504,2.2572329115,1.7378905197<br>H,0,-0.2707712958,2.2677248868,2.4677516475<br>H,0,-1.9102833447,1.6620653864,2.1667628142<br>H,0,-1.4505177954,3.2818331023,1.6196110011<br>H,0,1.054064858,0.4339214123,1.0039976981                                                                                                                                                                                       | B,0,0.0342201972,0.5568642015,1.0995157332<br>O,0,-0.7245605942,-0.1254185859,2.0012315588<br>O,0,-0.2040032738,1.8708569756,0.8748846273<br>C,0,-0.4901039758,-1.4978535342,2.2486848794<br>H,0,0.3336639165,-1.8848201589,1.6444824442<br>H,0,-1.3928504456,-2.0656676434,2.0202972453<br>H,0,-0.2513560957,-1.6392350679,3.3034510699<br>C,0,-1.2460812244,2.5230513356,1.5852116678<br>H,0,-1.0746435537,2.4887762647,2.6626985236<br>H,0,-2.2147530912,2.0631810075,1.3809008563<br>H,0,-1.2676435232,3.5609699209,1.2597602173<br>H,0,0.9127566638,0.0315052845,0.4924441769                                                                                                                                                                                   |
| $\begin{array}{c} \text{OCH}_3 \\   \\ \text{H}_3\text{CO}-\text{B}-\text{OCH}_3 \\   \\ \text{NH}_3 \end{array}$                                                                                                                                                                                                                                                                                                                                                                                                                                                                                                                                                                                                                                                                                                                                                                                                                                                   | $\begin{array}{c} \text{OCH}_3 \\   \\ \text{H}_3\text{CO}-\text{B}-\text{OCH}_3 \end{array}$                                                                                                                                                                                                                                                                                                                                                                                                                                                                                                                                                                                                                                                                        |
| B,0,0.0901431041,0.4992858385,0.5138488939<br>N,0,0.0427307869,0.229924655,-1.1480805606<br>H,0,0.6298176208,-0.5605127339,-1.3885870374<br>H,0,0.3766700934,1.0494010013,-1.6422957355<br>H,0,-0.9076161885,0.0343067298,-1.441133176<br>O,0,-0.8244387524,-0.4982580853,0.9978479208<br>O,0,1.4792424236,0.2748387954,0.8068258817<br>C,0,-0.3596900734,1.8615143803,0.6021235932<br>C,0,-0.5398542607,-1.1263023158,2.2171438077<br>H,0,0.4941445795,-1.4857742571,2.2623328415<br>H,0,-1.2079921277,-1.9811486973,2.3353328025<br>H,0,-0.7003258785,-0.4602212974,3.0768466449<br>C,0,2.0894045022,1.0687636522,1.7863645015<br>H,0,3.1686929044,0.913029301,1.741391834<br>H,0,1.7596484943,0.8056035051,2.8015057447<br>H,0,1.8865280666,2.1348700726,1.635785688<br>C,0,-1.1606400123,2.2285157811,1.6911137288<br>H,0,-0.5901601086,2.2815280906,2.6293282063<br>H,0,-1.9903937293,1.5296571566,1.8444796924<br>H,0,-1.5750756317,3.2204331314,1.5027463444 | B,0,0.0154374787,0.144656449,1.1949377116<br>O,0,0.0924583678,0.3028216437,-0.1603277806<br>O,0,-1.1983728714,0.1950689926,1.8208897944<br>O,0,1.1522269397,-0.0639212891,1.924251121<br>C,0,1.3582780109,0.247736972,-0.7926207092<br>H,0,2.026077169,1.0271710743,-0.419800021<br>H,0,1.2017442142,0.3950146671,-1.8596002175<br>H,0,1.843237666,-0.7176989078,-0.6338246258<br>C,0,1.054132678,-0.2257727205,3.3275720634<br>H,0,2.0600814677,-0.3785862992,3.7140353383<br>H,0,0.4375116612,-1.0883385843,3.5887753429<br>H,0,0.6203511641,0.6565313978,3.8027999478<br>C,0,-2.3660982529,0.4120050956,1.0498617806<br>H,0,-2.3258566426,1.3675718481,0.5228501152<br>H,0,-3.2155132458,0.4175409793,1.7303780139<br>H,0,-2.5086961456,-0.377298134,0.3088255104 |
| $\begin{array}{c} \text{H}_3\text{C} \\   \\ \text{C}-\text{OH} \\   \\ \text{H}_3\text{C} \end{array}$                                                                                                                                                                                                                                                                                                                                                                                                                                                                                                                                                                                                                                                                                                                                                                                                                                                             | $\begin{array}{c} (\text{H}_3\text{C})_2\text{HCO} \\   \\ \text{H}_2\text{B}-\text{NH}_3 \end{array}$                                                                                                                                                                                                                                                                                                                                                                                                                                                                                                                                                                                                                                                               |
| C,0,-0.0695666809,0.0103070677,1.1484734187<br>H,0,-0.5840545072,-0.8649039429,1.5753804968<br>H,0,-0.2145951894,-0.0048179026,-0.273504804<br>O,0,0.2477294242,-0.7814156008,-0.6033317551<br>C,0,1.3916128452,-0.0400491731,1.5478439549<br>H,0,1.9271528322,0.8179740176,1.1390742806                                                                                                                                                                                                                                                                                                                                                                                                                                                                                                                                                                                                                                                                            | B,0,-0.1322192354,0.4415472352,0.9632312009<br>H,0,0.9129942539,0.9097189848,1.3674127213<br>H,0,-0.9926849301,1.2875749514,0.8152852015<br>N,0,0.189375292,-0.0822339618,-0.5721196387<br>H,0,0.9347977385,-0.7706745195,-0.5554485258<br>H,0,0.4476998499,0.6647257681,-1.2060401659                                                                                                                                                                                                                                                                                                                                                                                                                                                                               |

|                                                                                                                                                                                                                                                                                       |                                                                                                                                                                                                                                                                                                                                                                                                                                                                                                                                                                                 |
|---------------------------------------------------------------------------------------------------------------------------------------------------------------------------------------------------------------------------------------------------------------------------------------|---------------------------------------------------------------------------------------------------------------------------------------------------------------------------------------------------------------------------------------------------------------------------------------------------------------------------------------------------------------------------------------------------------------------------------------------------------------------------------------------------------------------------------------------------------------------------------|
| H,0,1.8746552549,-0.9455157156,1.1755367962<br>H,0,1.5070264499,-0.0307773041,2.6322789213<br>C,0,-0.7591443369,1.2632405521,1.6310332985<br>H,0,-0.2677346129,2.1467672166,1.2217703474<br>H,0,-0.7310114537,1.3284698109,2.7182122907<br>H,0,-1.7999275953,1.2788423173,1.312277716 | H,0,-0.6366200916,-0.5452517981,-0.9381665743<br>O,0,-0.5551729264,-0.8089160037,1.5554937832<br>C,0,-0.5702078807,-0.9407974395,2.9635858793<br>H,0,-1.1289955524,-1.8649415441,3.1603837573<br>C,0,0.83420931,-1.1122865304,3.5199132945<br>H,0,1.340927183,-1.9466217941,3.0345759348<br>H,0,0.8104718443,-1.3081082957,4.5931443959<br>H,0,1.4288365021,-0.2127384942,3.3556013999<br>C,0,-1.302746753,0.2082922355,3.6343848907<br>H,0,-0.7628857303,1.146656231,3.4912434329<br>H,0,-1.399224909,0.0375760608,4.7075885898<br>H,0,-2.3007216277,0.3308857653,3.2146647996 |
| H-Cl                                                                                                                                                                                                                                                                                  | H2                                                                                                                                                                                                                                                                                                                                                                                                                                                                                                                                                                              |
| H,0,0.,0.,0.3432323259<br>Cl,0,0.,0.,-0.9432323259 H,0,0.,0.,0.3721688168<br>H,0,0.,0.,-0.3721688168                                                                                                                                                                                  | H,0,0.,0.,0.3721688168<br>H,0,0.,0.,-0.3721688168                                                                                                                                                                                                                                                                                                                                                                                                                                                                                                                               |

## References

- 1 A. V. Polezhaev, C.-H. Chen, Y. Losovyj and K. G. Caulton, *Chem. Eur. J.*, 2017, **23**, 8039-8050.
- 2 a) J.-F. Petit and U. B. Demirci, *Inorg. Chem.*, 2019, **58**, 489-494; b) W. J. James, L. Jagat, Q. Cai, W. B. Yelon and J. B. Yang, *Mater. Sci. Forum*, 2009, **610-613**, 425-430; c) M. G. Hu, J. M. Van Paasschen and R. A. Geanangel, *J. Inorg. Nucl. Chem.*, 1977, **39**, 2147-2150.
- 3 B. J. Cook, C.-H. Chen, M. Pink, R. L. Lord, K. G. Caulton, *Inorg. Chim. Acta* **2016**, *451*, 82-91.
- 4 C. Belger and B. Plietker, *Chem. Commun.*, 2012, **48**, 5419-5421.
- 5 W. Yang, Y. Chen, Y. Yao, X. Yang, Q. Lin and D. Yang, *J. Org. Chem.*, 2019, **84**, 11080-11090.
- 6 S. Wang, Y. Min, X. Zhang and C. Xi, *RSC Adv.*, 2017, **7**, 28308-28312.
- 7 N. Kalashnyk, P. Ganesh Nagaswaran, S. Kervyn, M. Riello, B. Moreton, T. S. Jones, A. De Vita, D. Bonifazi and G. Costantini, *Chem. Eur. J.*, 2014, **20**, 11856-11862.
- 8 H. Naeimi and F. Kiani, *J. Organomet. Chem.*, 2019, **885**, 65-72.
- 9 S. Sadjadi, *Appl. Organomet. Chem.* **2018**, *32*, e4211.
- 10 G. C. Edwin Raja, F. M. Irudayanathan, H.-S. Kim, J. Kim and S. Lee, *J. Org. Chem.*, 2016, **81**, 5244-5249.
- 11 M. J. Frisch, *et al.*, Gaussian 09, Revision C.01, Gaussian, Inc., Wallingford CT, 2010
- 12 Y. Zhao and D. G. Truhlar, *J. Chem. Phys.*, 2006, **125**, 194101: 1-18.
- 13 A. Schaefer, C. Huber and R. Ahlrichs, *J. Chem. Phys.*, 1994, **100**, 5829-5835.
- 14 J. Liu, Z. Wie and H Jiao, *ACS Catal.*, 2021, **11**, 4593-4605.
- 15 M. Garbe, S. Budweg, V. Papa, Z. Wei, H. Hornke, S. Bachmann, M. Scalone, A. Spannenberg, H. Jiao, K. Junge and M. Beller, *Catal. Sci. Technol.*, 2020, **10**, 3994-4001.
- 16 J. A. V. Marenich, C. J. Cramer and D. G. Truhlar, *J. Phys. Chem. B*, 2009, **113**, 6378-6396.
